# Supplementary material for: Palladium-catalyzed regio- and enantioselective migratory allylic C(sp3)-H functionalization
Source: PubMed Central journal article supplement (PMC8463607; doi:10.1038/s41467-021-25978-6), 2021-09-24
Supplement: 41467_2021_25978_MOESM1_ESM.pdf [file 41467_2021_25978_MOESM1_ESM.pdf]

Supplementary Information for

**Palladium-Catalyzed Regio- and Enantioselective Migratory  
Allylic C(sp<sup>3</sup>)-H Functionalization**

Ye-Wei Chen,<sup>1,2,3</sup> Yang Liu,<sup>1,3</sup> Han-Yu Lu,<sup>1,2</sup> Guo-Qiang Lin<sup>1,2,\*</sup> and Zhi-Tao He<sup>1,\*</sup>

<sup>1</sup> Key Laboratory of Synthetic Chemistry of Natural Substances, Center for Excellence in Molecular Synthesis, Shanghai Institute of Organic Chemistry, University of Chinese Academy of Sciences, Shanghai, 200032, China.

<sup>2</sup> School of Physical Science and Technology, ShanghaiTech University, Shanghai, 201210, China.

<sup>3</sup> These authors contributed equally to this work.

\*Correspondence to: lingq@sioc.ac.cn (G.-Q.L.); hezt@sioc.ac.cn (Z.-T.H.)

|                                                                                               |      |
|-----------------------------------------------------------------------------------------------|------|
| <b>Supplementary Methods</b> .....                                                            | S2   |
| 1. General information .....                                                                  | S2   |
| 2. Synthesis of substrates .....                                                              | S2   |
| 3. Development of reaction conditions.....                                                    | S13  |
| 4. General procedure for Pd-catalyzed migratory allylic functionalization.....                | S14  |
| 5. Chain walking test of different nucleophiles.....                                          | S38  |
| 6. Substrates ineffective for the migratory allylation.....                                   | S40  |
| 7. Mechanistic studies.....                                                                   | S41  |
| 8. Regioconvergent synthesis, gram-scale test and transformations of allylation products..... | S57  |
| 9. X-ray crystal structure of compound <b>11</b> .....                                        | S61  |
| 10. Copies of <sup>1</sup> H NMR, <sup>13</sup> C NMR, and <sup>19</sup> F NMR spectra.....   | S71  |
| <b>Supplementary References</b> .....                                                         | S155 |

## Supplementary Methods

### 1. General information

All air-sensitive procedures were conducted by Schlenk techniques under argon. Unless otherwise indicated, all commercially available starting materials and dry solvents were purchased and used directly without further purification.  $^1\text{H}$ ,  $^{13}\text{C}$  and  $^{19}\text{F}$  NMR spectra were acquired on 400 MHz Bruker or 500 MHz Agilent instruments at Shanghai Institute of Organic Chemistry. For High-resolution mass spectra: ESI mass spectra were recorded on Thermo Scientific Q Exactive HF Orbitrap-FTMS; MALDI was measured on Voyager-DE STR; EI mass spectra were recorded on Waters Premier GC-TOF MS; FI mass spectra were recorded on JEOL-AccuTOF-GCv4G-GCT MS. Optical rotation was measured using a 1 mL cell with 1.0 dm path length on a JASCO P-1030 polarimeter. HPLC analysis was conducted on a Shimadzu HPLC system equipped with Daicel or Chiralpak chiral-stationary-phase columns ( $\phi$  4.6 mm $\times$ 250 mm). Chemical shifts are reported in  $\delta$  (ppm) referenced to an internal TMS standard or  $\text{CHCl}_3$  in  $\text{CDCl}_3$  (7.26 ppm) for  $^1\text{H}$  NMR,  $\text{CDCl}_3$  ( $\delta = 77.10$  ppm) for  $^{13}\text{C}$  NMR, and  $\text{CFC}_l_3$  (0 ppm) for  $^{19}\text{F}$  NMR. Coupling constants ( $J$ ) are reported in Hz. Multiplicities are reported using the following abbreviations: br = broad, s = singlet, d = doublet, t = triplet, q = quartet, m = multiplet. Column chromatography was performed with 300-400 mesh silica gel using flash column chromatography technique.

### 2. Synthesis of substrates

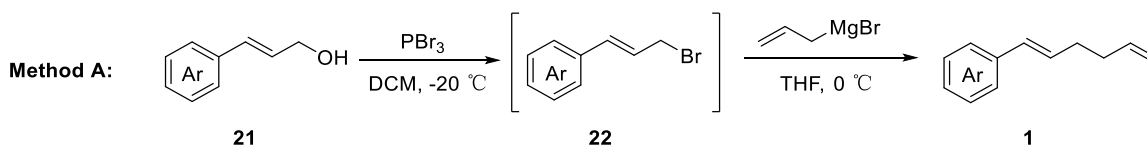

**Method A:** To a 25 mL flask were added the allyl alcohol **21** (1 mmol) and  $\text{DCM}$  (10 mL, 0.1 M) under nitrogen. Then  $\text{PBr}_3$  (0.3 mmol) was added to the solution dropwise at  $-20\text{ }^\circ\text{C}$ . The resulting mixture was stirred at  $-20\text{ }^\circ\text{C}$  and monitored by TLC until the complete consumption of substrate **21**. Then the reaction was condensed directly to afford the crude allyl bromide **22** without further purification. Next, the allyl bromide **22** was dissolved in dry  $\text{THF}$  (2 mL) and the reaction mixture was cooled down to  $0\text{ }^\circ\text{C}$ , followed by the addition of allyl magnesium bromide (2 mmol, 1 mL, 2 M in  $\text{THF}$ ) dropwise over 5 min. After the fully conversion of intermediate **22**, the reaction was condensed and purified by flash column chromatography to give the distant diene compound **1**.

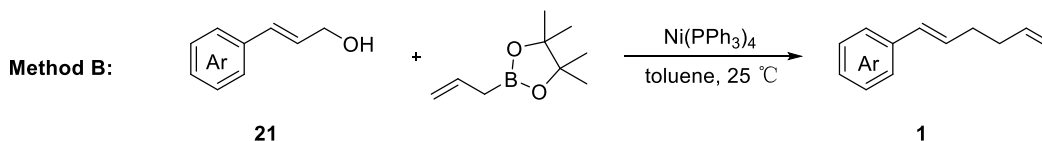

**Method B** was conducted according to the reported literature<sup>[1]</sup>: To a 25 mL Schlenk tube were added tetrakis(triphenylphosphine)nickel (0.15 mmol, 10 mol%), allyl alcohol (1.5 mmol, 1.0 equiv) and toluene (15 mL). The Allylboronic acid pinacol ester (1.8 mmol) was then added to the mixture dropwise over 5 min at room temperature. After this time, the resulting mixture continued to stir at room temperature and was monitored by TLC. The reaction was diluted with diethyl ether (6 mL), filtered through a pad of

silica gel, condensed and purified by flash column chromatography to give the distant diene compound **1**.

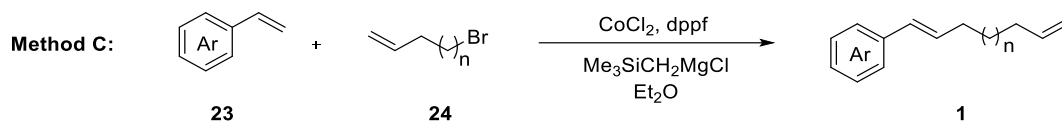

**Method C** was conducted according to the reported literature<sup>[2]</sup>. To a 50 mL flask were added CoCl<sub>2</sub> (0.15 mmol, 5.0 mol%) 1,1'-Bis(diphenylphosphino)ferrocene (dppf, 0.18 mmol, 6.0 mol%) and Et<sub>2</sub>O (10 mL) under nitrogen. The mixture was stirred at room temperature for 30 min. Then alkyl bromide **24** (4.5 mmol, 1.5 equiv), alkene **23** (3.0 mmol, 1.0 equiv) and (trimethylsilyl)methylmagnesium chloride (7.5 mmol, 2.5 equiv) were added to the reaction sequentially at 0 °C. The resulting mixture was stirred at room temperature for 6 h. After this time, the reaction was quenched by saturated aqueous NH<sub>4</sub>Cl solution (10 mL), extracted by ethyl acetate (10 mL × 3), condensed and purified by flash column chromatography to give the pure desired products **1**.

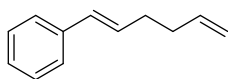

#### (E)-Hexa-1,5-dien-1-ylbenzene (**1a**)

**1a** was prepared according to method A. Known compound<sup>[1]</sup>. Colorless oil, 65% yield. <sup>1</sup>H NMR (600 MHz, chloroform-*d*) δ 7.33 – 7.32 (m, 2H), 7.29 – 7.23 (m, 2H), 7.21 – 7.13 (m, 1H), 6.39 (d, *J* = 15.8 Hz, 1H), 6.26 – 6.15 (m, 1H), 5.88 – 5.82 (m, 1H), 5.11 – 4.94 (m, 2H), 2.33 – 2.14 (m, 4H). HRMS (EI): [M]<sup>+</sup> calcd for C<sub>12</sub>H<sub>14</sub><sup>+</sup> 158.1090, found 158.1093.

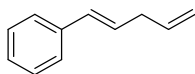

#### (E)-Penta-1,4-dien-1-ylbenzene (**1b**)

**1b** was prepared according to the reported literature<sup>[3]</sup>. Colorless oil, 65% yield. <sup>1</sup>H NMR (400 MHz, chloroform-*d*) δ 7.36 (d, *J* = 6.7 Hz, 2H), 7.33 – 7.27 (m, 2H), 7.25 – 7.17 (m, 1H), 6.42 (d, *J* = 15.8 Hz, 1H), 6.23 (dt, *J* = 15.7, 6.6 Hz, 1H), 5.99 – 5.84 (m, 1H), 5.17 – 5.07 (m, 1H), 5.11 – 5.04 (m, 1H), 2.97 (t, *J* = 6.6 Hz, 2H). HRMS (EI): [M]<sup>+</sup> calcd for C<sub>11</sub>H<sub>12</sub><sup>+</sup> 144.0934, found 144.0935.

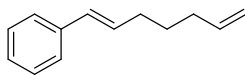

#### (E)-Hepta-1,6-dien-1-ylbenzene (**1c**)

**1c** was prepared according to method C. Known compound<sup>[4]</sup>. Colorless oil, 58% yield. <sup>1</sup>H NMR (400 MHz, chloroform-*d*) δ 7.35 – 7.26 (m, 4H), 7.22 – 7.14 (m, 1H), 6.39 (d, *J* = 15.8 Hz, 1H), 6.21 (dt, *J* = 15.8, 6.9 Hz, 1H), 5.89 – 5.77 (m, 1H), 5.07 – 4.97 (m, 2H), 2.25 – 2.20 (m, 2H), 2.14 – 2.09 (m, 2H), 1.61 – 1.54 (m, 2H). HRMS (EI): [M]<sup>+</sup> calcd for C<sub>13</sub>H<sub>16</sub><sup>+</sup> 172.1247, found 172.1250.

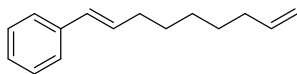

### (E)-Nona-1,8-dien-1-ylbenzene (1d)

**1d** was prepared according to method C. Colorless oil, 68% yield.  $^1\text{H}$  NMR (500 MHz, chloroform-*d*)  $\delta$  7.33 (d,  $J = 8.3$  Hz, 2H), 7.27 (t,  $J = 7.6$  Hz, 2H), 7.17 (t,  $J = 7.3$  Hz, 1H), 6.37 (d,  $J = 15.8$  Hz, 1H), 6.21 (dt,  $J = 15.6, 6.9$  Hz, 1H), 5.85 – 5.77 (m, 1H), 5.04 – 4.92 (m, 2H), 2.22 – 2.17 (m, 2H), 2.07 – 2.03 (m, 2H), 1.50 – 1.44 (m, 2H), 1.42 – 1.32 (m, 4H).  $^{13}\text{C}$  NMR (126 MHz, chloroform-*d*)  $\delta$  139.1, 138.0, 131.1, 129.8, 128.5, 126.8, 126.0, 114.3, 33.8, 33.1, 29.3, 28.9, 28.8. HRMS (EI):  $[\text{M}]^{\oplus}$  calcd for  $\text{C}_{15}\text{H}_{20}^{\oplus}$  200.1560, found 200.1564.

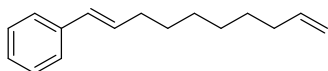

### (E)-Deca-1,9-dien-1-ylbenzene (1e)

**1e** was prepared according to method C. Colorless oil, 71% yield.  $^1\text{H}$  NMR (500 MHz, chloroform-*d*)  $\delta$  7.37 – 7.26 (m, 4H), 7.22 – 7.14 (m, 1H), 6.40 – 6.36 (m, 1H), 6.23 (dt,  $J = 15.8, 6.9$  Hz, 1H), 5.86 – 5.78 (m, 1H), 5.02 – 4.91 (m, 2H), 2.23 – 2.18 (m, 2H), 2.09 – 2.01 (m, 2H), 1.52 – 1.29 (m, 8H).  $^{13}\text{C}$  NMR (126 MHz, chloroform-*d*)  $\delta$  139.3, 138.0, 131.3, 129.8, 128.6, 126.8, 126.0, 114.3, 33.9, 33.1, 29.4, 29.1, 29.1, 29.0. HRMS (EI):  $[\text{M}]^{\oplus}$  calcd for  $\text{C}_{16}\text{H}_{22}^{\oplus}$  214.1716, found 214.1720.

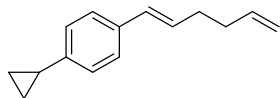

### (E)-1-Cyclopropyl-4-(hexa-1,5-dien-1-yl)benzene (1f)

**1f** was prepared according to method B. Colorless oil, 56% yield.  $^1\text{H}$  NMR (400 MHz, chloroform-*d*)  $\delta$  7.22 (d,  $J = 8.1$  Hz, 2H), 6.98 (d,  $J = 8.1$  Hz, 2H), 6.35 (d,  $J = 15.8$  Hz, 1H), 6.15 (dt,  $J = 15.8, 6.6$  Hz, 1H), 5.92 – 5.78 (m, 1H), 5.11 – 4.91 (m, 2H), 2.34 – 2.15 (m, 4H), 1.88 – 1.81 (m, 1H), 0.96 – 0.89 (m, 2H), 0.69 – 0.64 (m, 2H).  $^{13}\text{C}$  NMR (126 MHz, chloroform-*d*)  $\delta$  142.7, 138.2, 135.1, 130.1, 128.9, 125.9, 125.8, 114.9, 33.7, 32.5, 15.3, 9.2. HRMS (EI):  $[\text{M}]^{\oplus}$  calcd for  $\text{C}_{15}\text{H}_{18}^{\oplus}$  198.1403, found 198.1402.

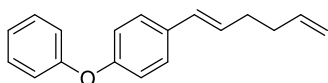

### (E)-1-(Hexa-1,5-dien-1-yl)-4-phenoxybenzene (1g)

**1g** was prepared according to method B. Colorless oil, 47% yield.  $^1\text{H}$  NMR (500 MHz, chloroform-*d*)  $\delta$  7.34 – 7.30 (m, 4H), 7.09 (t,  $J = 7.3$  Hz, 1H), 7.00 (d,  $J = 8.0$  Hz, 2H), 6.94 (d,  $J = 8.2$  Hz, 2H), 6.37 (d,  $J = 15.7$  Hz, 1H), 6.18 – 6.12 (m, 1H), 5.91 – 5.83 (m, 1H), 5.09 – 5.08 (m, 1H), 5.01 – 5.99 (m, 1H), 2.33 – 2.29 (m, 2H), 2.25 – 2.21 (m, 2H).  $^{13}\text{C}$  NMR (126 MHz, chloroform-*d*)  $\delta$  169.1, 168.0, 160.1, 138.2, 129.8, 129.4, 129.4, 127.3, 123.2, 119.1, 118.8, 115.0, 33.7, 32.5. HRMS (ESI):  $[\text{M}+\text{H}]^{\oplus}$  calcd for  $\text{C}_{18}\text{H}_{19}\text{O}^{\oplus}$  251.1430, found 251.1429.

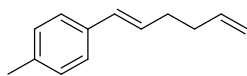

### (E)-1-(Hexa-1,5-dien-1-yl)-4-methylbenzene (1h)

**1h** was prepared according to method B. Known compound<sup>[5]</sup>. Colorless oil, 71% yield. <sup>1</sup>H NMR (400 MHz, chloroform-*d*)  $\delta$  7.23 (d,  $J$  = 8.0 Hz, 2H), 7.09 (d,  $J$  = 7.9 Hz, 2H), 6.36 (d,  $J$  = 15.8 Hz, 1H), 6.16 (dt,  $J$  = 15.8, 6.6 Hz, 1H), 5.93 – 5.78 (m, 1H), 5.10 – 5.00 (m, 1H), 5.02 – 4.94 (m, 1H), 2.33 – 2.24 (m, 5H), 2.28 – 2.16 (m, 2H). HRMS (EI):  $[M]^+$  calcd for C<sub>13</sub>H<sub>16</sub><sup>+</sup> 172.1247, found 172.1247.

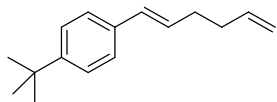

**(E)-1-(tert-Butyl)-4-(hexa-1,5-dien-1-yl)benzene (1i)**

**1i** was prepared according to method B. Known compound<sup>[6]</sup>. Colorless oil, 36% yield. <sup>1</sup>H NMR (500 MHz, chloroform-*d*)  $\delta$  7.47 – 7.38 (m, 4H), 6.52 (d,  $J$  = 15.8 Hz, 1H), 6.31 (dt,  $J$  = 15.9, 6.8 Hz, 1H), 6.07 – 5.91 (m, 1H), 5.23 – 5.15 (m, 1H), 5.15 – 5.09 (m, 1H), 2.45 – 2.41 (m, 2H), 2.39 – 2.31 (m, 2H), 1.44 (s, 9H). HRMS (EI):  $[M]^+$  calcd for C<sub>16</sub>H<sub>22</sub><sup>+</sup> 214.1716, found 214.1720.

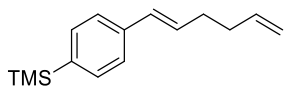

**(E)-4-(hexa-1,5-dien-1-yl)phenyltrimethylsilane (1j)**

**1j** was prepared according to method B. Colorless oil, 41% yield. <sup>1</sup>H NMR (500 MHz, chloroform-*d*)  $\delta$  7.62 – 7.54 (m, 2H), 7.47 – 7.42 (m, 2H), 6.51 (d,  $J$  = 15.9 Hz, 1H), 6.37 (dt,  $J$  = 15.9, 6.7 Hz, 1H), 6.01 – 5.93 (m, 1H), 5.27 – 5.04 (m, 2H), 2.47 – 2.39 (m, 2H), 2.38 – 2.30 (m, 2H), 0.38 (s, 9H). <sup>13</sup>C NMR (126 MHz, chloroform-*d*)  $\delta$  139.0, 138.3, 138.1, 133.6, 130.5, 130.3, 125.4, 115.0, 33.6, 32.6, -1.01. HRMS (EI):  $[M]^+$  calcd for C<sub>15</sub>H<sub>22</sub>Si<sup>+</sup> 230.1485, found 230.1489.

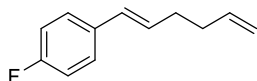

**(E)-1-fluoro-4-(hexa-1,5-dien-1-yl)benzene (1k)**

**1k** was prepared according to method B. Known compounds<sup>[7]</sup>. Colorless oil, 68% yield. <sup>1</sup>H NMR (400 MHz, chloroform-*d*)  $\delta$  7.38 – 7.24 (m, 2H), 7.03 – 6.92 (m, 2H), 6.36 (d,  $J$  = 15.8 Hz, 1H), 6.13 (dt,  $J$  = 15.9, 6.6 Hz, 1H), 5.96 – 5.78 (m, 1H), 5.14 – 4.95 (m, 2H), 2.35 – 2.17 (m, 4H). HRMS (EI):  $[M]^+$  calcd for C<sub>12</sub>H<sub>13</sub>F<sup>+</sup> 176.1003, found 176.1000.

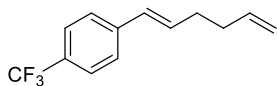

**(E)-1-(hexa-1,5-dien-1-yl)-4-(trifluoromethyl)benzene (1l)**

**1l** was prepared according to method B. Known compounds<sup>[7]</sup>. Colorless oil, 70% yield. <sup>1</sup>H NMR (500 MHz, chloroform-*d*)  $\delta$  7.56 (d,  $J$  = 7.9 Hz, 2H), 7.44 (d,  $J$  = 8.0 Hz, 2H), 6.49 – 6.33 (m, 1H), 6.41 – 6.32 (m, 1H), 5.99 – 5.81 (m, 1H), 5.20 – 4.97 (m, 2H), 2.41 – 2.33 (m, 2H), 2.32 – 2.24 (m, 2H). HRMS (EI):  $[M]^+$  calcd for C<sub>13</sub>H<sub>13</sub>F<sub>3</sub><sup>+</sup> 226.0694, found 226.0697.

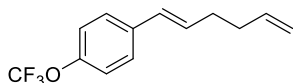

**(E)-1-(Hexa-1,5-dien-1-yl)-4-(trifluoromethoxy)benzene (1m)**

**1m** was prepared according to method A. Colorless oil, 51% yield. <sup>1</sup>H NMR (500 MHz, chloroform-*d*) δ 7.39 – 7.33 (m, 2H), 7.16 (d, *J* = 8.2 Hz, 2H), 6.41 (d, *J* = 15.8 Hz, 1H), 6.23 (dt, *J* = 15.8, 6.7 Hz, 1H), 5.93 – 5.85 (m, 1H), 5.15 – 4.97 (m, 2H), 2.38 – 2.31 (m, 2H), 2.28 – 2.24 (m, 2H). <sup>13</sup>C NMR (126 MHz, chloroform-*d*) δ 148.1, 138.0, 136.7, 131.3, 128.9, 127.2, 121.1, 120.6 (q, *J* = 257.0 Hz), 115.1, 33.5, 32.4. HRMS (EI): [*M*]<sup>+</sup> calcd for C<sub>13</sub>H<sub>13</sub>F<sub>3</sub>O<sup>+</sup> 242.0913, found 242.0910.

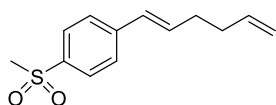

**(E)-1-(Hexa-1,5-dien-1-yl)-4-(methylsulfonyl)benzene (1n)**

**1n** was prepared according to method A. Yellow oil, 62% yield. <sup>1</sup>H NMR (600 MHz, chloroform-*d*) δ 7.88 – 7.83 (m, 2H), 7.52 – 7.47 (m, 2H), 6.48 – 6.37 (m, 2H), 5.88 – 5.82 (m, 1H), 5.14 – 4.95 (m, 2H), 3.04 (s, 3H), 2.39 – 2.33 (m, 2H), 2.29 – 2.22 (m, 2H). <sup>13</sup>C NMR (151 MHz, chloroform-*d*) δ 143.2, 138.3, 137.6, 134.7, 128.7, 127.7, 126.6, 115.3, 44.6, 33.1, 32.4. HRMS (ESI): [*M*+*H*]<sup>+</sup> calcd for C<sub>13</sub>H<sub>17</sub>O<sub>2</sub>S<sup>+</sup> 237.0944, found 237.0944.

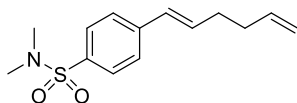

**(E)-4-(Hexa-1,5-dien-1-yl)-*N,N*-dimethylbenzenesulfonamide (1o)**

**1o** was prepared according to method A. Colorless oil, 42% yield. <sup>1</sup>H NMR (500 MHz, chloroform-*d*) δ 7.69 (d, *J* = 8.1 Hz, 2H), 7.48 (d, *J* = 8.1 Hz, 2H), 6.45 (d, *J* = 16.0 Hz, 1H), 6.44 – 6.34 (m, 1H), 5.90 – 5.82 (m, 1H), 5.12 – 4.99 (m, 2H), 2.69 (s, 6H), 2.40 – 2.32 (m, 2H), 2.30 – 2.21 (m, 2H). <sup>13</sup>C NMR (126 MHz, chloroform-*d*) δ 142.2, 137.7, 134.1, 133.2, 128.8, 128.1, 126.3, 115.3, 38.0, 33.2, 32.4. HRMS (EI): [*M*]<sup>+</sup> calcd for C<sub>14</sub>H<sub>19</sub>O<sub>2</sub>NS<sup>+</sup> 265.1131, found 265.1134.

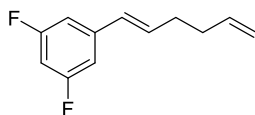

**(E)-1,3-Difluoro-5-(hexa-1,5-dien-1-yl)benzene (1p)**

**1p** was prepared according to method B. Colorless oil, 51% yield. <sup>1</sup>H NMR (500 MHz, chloroform-*d*) δ 6.84 (d, *J* = 7.2 Hz, 2H), 6.64 (t, *J* = 8.9 Hz, 1H), 6.37 – 6.20 (m, 2H), 5.92 – 5.78 (m, 1H), 5.05 (dd, *J* = 27.0, 13.7 Hz, 2H), 2.38 – 2.29 (m, 2H), 2.29 – 2.20 (m, 2H). <sup>13</sup>C NMR (126 MHz, chloroform-*d*) δ 163.3 (dd, *J* = 247.2, 13.2 Hz), 141.3 (t, *J* = 9.5 Hz), 137.8, 133.1, 128.6 (t, *J* = 2.8 Hz), 115.3, 108.7 (dd, *J* =

19.4, 5.7 Hz), 102.1 (t,  $J = 25.7$  Hz), 33.3, 32.3.  $^{19}\text{F}$  NMR (376 MHz, Methylene Chloride- $d_2$ )  $\delta$  -111.82 (t,  $J = 7.9$  Hz). HRMS (EI):  $[\text{M}]^{\oplus}$  calcd for  $\text{C}_{12}\text{H}_{12}\text{F}_2^{\oplus}$  194.0902, found 194.0905.

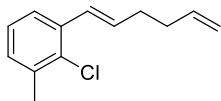

#### **(E)-2-Chloro-1-(hexa-1,5-dien-1-yl)-3-methylbenzene (1q)**

**1q** was prepared according to method B. Colorless oil, 58% yield.  $^1\text{H}$  NMR (500 MHz, chloroform- $d$ )  $\delta$  7.35 – 7.33 (m, 1H), 7.10 (d,  $J = 4.8$  Hz, 2H), 6.85 – 6.82 (m, 1H), 6.20 – 6.14 (m, 1H), 5.94 – 5.81 (m, 1H), 5.12 – 4.97 (m, 2H), 2.38 – 2.34 (m, 5H), 2.29 – 2.24 (m, 2H).  $^{13}\text{C}$  NMR (126 MHz, chloroform- $d$ )  $\delta$  138.1, 136.6, 136.3, 133.0, 129.3, 127.3, 126.2, 124.4, 115.1, 33.5, 32.6, 20.9 (one aromatic carbon signal was not observed because of overlapping). HRMS (EI):  $[\text{M}]^{\oplus}$  calcd for  $\text{C}_{13}\text{H}_{15}\text{Cl}^{\oplus}$  206.0857, found 206.0858.

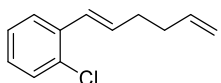

#### **(E)-1-Chloro-2-(hexa-1,5-dien-1-yl)benzene (1r)**

**1r** was prepared according to method A. Colorless oil, 24% yield.  $^1\text{H}$  NMR (500 MHz, chloroform- $d$ )  $\delta$  7.46 (dd,  $J = 7.7, 1.7$  Hz, 1H), 7.30 (d,  $J = 7.9$  Hz, 1H), 7.15 (t,  $J = 7.5$  Hz, 1H), 7.12 – 7.06 (m, 1H), 6.78 (d,  $J = 15.8$  Hz, 1H), 6.18 (dt,  $J = 15.8, 6.8$  Hz, 1H), 5.89 – 5.81 (m, 1H), 5.08 – 5.04 (m, 1H), 5.00 (d,  $J = 9.9$  Hz, 1H), 2.38 – 2.30 (m, 2H), 2.26 – 2.21 (m, 2H).  $^{13}\text{C}$  NMR (126 MHz, chloroform- $d$ )  $\delta$  137.9, 135.8, 133.0, 132.6, 129.6, 128.0, 126.8, 126.7, 126.5, 115.1, 100.0, 33.4, 32.6. HRMS (EI):  $[\text{M}]^{\oplus}$  calcd for  $\text{C}_{12}\text{H}_{13}\text{Cl}^{\oplus}$  192.0700, found 192.0702.

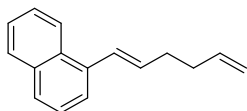

#### **(E)-1-(Hexa-1,5-dien-1-yl)naphthalene (1s)**

**1s** was prepared according to method B. Known compound<sup>[8]</sup>. Colorless oil, 50% yield.  $^1\text{H}$  NMR (500 MHz, chloroform- $d$ )  $\delta$  8.09 (d,  $J = 8.4$  Hz, 1H), 7.79 (dd,  $J = 7.6, 1.9$  Hz, 1H), 7.70 (d,  $J = 8.2$  Hz, 1H), 7.52 – 7.36 (m, 4H), 7.13 – 7.08 (m, 1H), 6.24 – 6.15 (m, 1H), 5.97 – 5.80 (m, 1H), 5.14 – 4.96 (m, 2H), 2.43 – 2.35 (m, 2H), 2.33 – 2.22 (m, 2H). HRMS (EI):  $[\text{M}]^{\oplus}$  calcd for  $\text{C}_{16}\text{H}_{16}^{\oplus}$  208.1247, found 208.1244.

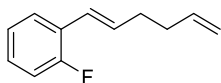

#### **(E)-1-Fluoro-2-(hexa-1,5-dien-1-yl)benzene (1t)**

**1t** was prepared according to method B. Known compound<sup>[9]</sup>. Colorless oil, 37% yield.  $^1\text{H}$  NMR (500 MHz, chloroform- $d$ )  $\delta$  7.42 (td,  $J = 7.7, 1.9$  Hz, 1H), 7.20 – 7.12 (m, 1H), 7.10 – 7.04 (m, 1H), 7.01 (ddd,  $J = 10.8, 8.1, 1.3$  Hz, 1H), 6.58 – 6.54 (m, 1H), 6.30 (dt,  $J = 16.0, 6.8$  Hz, 1H), 5.92 – 5.81 (m, 1H), 5.11

– 5.03 (m, 1H), 5.03 – 4.97 (m, 1H), 2.39 – 2.30 (m, 2H), 2.29 – 2.20 (m, 2H). HRMS (EI):  $[M]^+$  calcd for  $C_{12}H_{13}F^+$  176.0996, found 176.0995.

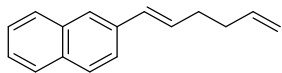

#### (E)-2-(Hexa-1,5-dien-1-yl)naphthalene (**1u**)

**1u** was prepared according to method B. Known compound<sup>[10]</sup>. Yellow solid, 80% yield.  $^1H$  NMR (400 MHz, chloroform-*d*)  $\delta$  7.80 – 7.74 (m, 3H), 7.67 (s, 1H), 7.60 – 7.55 (m, 1H), 7.46 – 7.38 (m, 2H), 6.56 (d,  $J = 15.9$  Hz, 1H), 6.36 (dt,  $J = 15.9, 6.6$  Hz, 1H), 5.97 – 5.82 (m, 1H), 5.14 – 5.05 (m, 1H), 5.05 – 4.98 (m, 1H), 2.42 – 2.32 (m, 2H), 2.32 – 2.22 (m, 2H). HRMS (EI):  $[M]^+$  calcd for  $C_{16}H_{16}^+$  208.1247, found 208.1251.

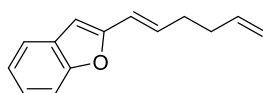

#### (E)-2-(Hexa-1,5-dien-1-yl)benzofuran (**1v**)

**1v** was prepared according to method B. Colorless oil, 47% yield.  $^1H$  NMR (600 MHz, chloroform-*d*)  $\delta$  7.49 – 7.47 (m, 1H), 7.41 (d,  $J = 8.1$  Hz, 1H), 7.26 – 7.14 (m, 2H), 6.50 – 6.45 (m, 2H), 6.35 – 6.32 (m, 1H), 5.90 – 5.83 (m, 1H), 5.13 – 5.05 (m, 1H), 5.04 – 4.99 (m, 1H), 2.39 – 2.32 (m, 2H), 2.31 – 2.23 (m, 2H).  $^{13}C$  NMR (151 MHz, chloroform-*d*)  $\delta$  155.1, 154.7, 137.9, 132.9, 129.2, 124.1, 122.8, 120.7, 119.1, 115.3, 110.9, 103.0, 33.2, 32.4. HRMS (EI):  $[M]^+$  calcd for  $C_{14}H_{14}O^+$  198.1039, found 198.1041.

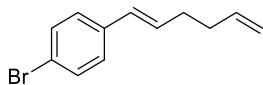

#### (E)-1-Bromo-4-(hexa-1,5-dien-1-yl)benzene (**1w**)

**1w** was prepared according to method A. Known compound<sup>[11]</sup>. Colorless oil, 80% yield.  $^1H$  NMR (500 MHz, chloroform-*d*)  $\delta$  7.39 (d,  $J = 8.4$  Hz, 2H), 7.19 (d,  $J = 8.5$  Hz, 2H), 6.33 (d,  $J = 15.8$  Hz, 1H), 6.25 – 6.16 (m, 1H), 5.90 – 5.79 (m, 1H), 5.08 – 5.03 (m, 1H), 5.01 – 4.99 (m, 1H), 2.33 – 2.26 (m, 2H), 2.26 – 2.18 (m, 2H).  $^{13}C$  NMR (126 MHz, chloroform-*d*)  $\delta$  137.99, 136.74, 131.60, 131.06, 129.15, 127.58, 120.58, 115.14, 33.45, 32.44. HRMS (EI):  $[M]^+$  calcd for  $C_{12}H_{13}Br^+$  236.0195, found 236.0197.

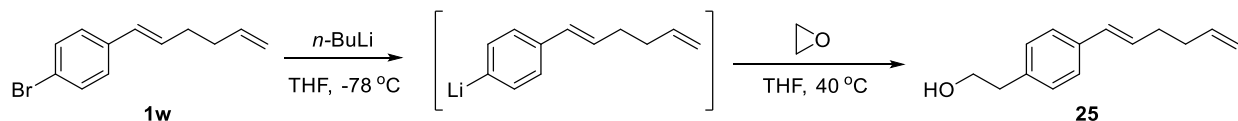

(E)-2-(4-(Hexa-1,5-dien-1-yl)phenyl)ethan-1-ol (**25**): To a 100 mL Schlenk tube with a magnetic stirring bar was added **1w** (2.4 g, 10 mmol) and THF (50 mL) under nitrogen. Then *n*-BuLi (1 M in THF, 15 mL) was added dropwise at  $-78$  °C and the mixture continued to stir at room temperature for 2 h. Next, epoxyethane (3 M in THF, 12 mmol) was added to the reaction. The resulting mixture stirred at  $40$  °C for 5 h. After this time, the reaction was quenched by ethyl acetate (15 mL), concentrated and purified by



flash column chromatography (hexane/ethyl acetate = 3/1) to give compound **25** as white solid in 58% yield.  $^1\text{H}$  NMR (500 MHz, chloroform-*d*)  $\delta$  7.29 (d,  $J = 7.8$  Hz, 2H), 7.16 (d,  $J = 7.8$  Hz, 2H), 6.38 (d,  $J = 15.8$  Hz, 1H), 6.20 (dt,  $J = 15.7, 6.7$  Hz, 1H), 5.90 – 5.82 (m, 1H), 5.06 (dd,  $J = 17.2, 2.0$  Hz, 1H), 4.99 (dd,  $J = 10.1, 2.0$  Hz, 1H), 3.84 (t,  $J = 6.5$  Hz, 2H), 2.84 (t,  $J = 6.6$  Hz, 2H), 2.33 – 2.29 (m, 2H), 2.25 – 2.21 (m, 2H), 1.42 (s, 1H).  $^{13}\text{C}$  NMR (126 MHz, chloroform-*d*)  $\delta$  138.2, 137.2, 136.2, 129.9, 129.9, 129.3, 126.3, 115.0, 63.7, 38.9, 33.6, 32.5. HRMS (EI):  $[\text{M}]^{\oplus}$  calcd for  $\text{C}_{14}\text{H}_{18}\text{O}^{\oplus}$  202.1352, found 202.1354.

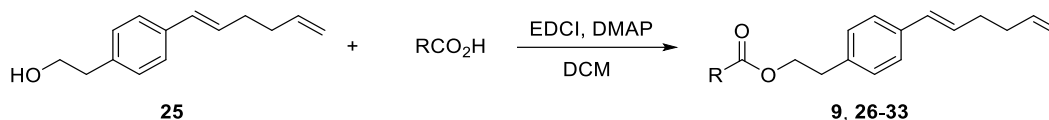

**General procedure for esterification:** To a 50 mL dry flask with a magnetic stirring bar were added **25** (0.4 g, 2 mmol), EDCI (0.42 g, 2.2 mmol), DMAP (0.6 g, 0.5 mmol), carboxylic acid (2 mmol) and DCM (10 mL). The reaction was stirred at room temperature for 12 h and monitored by TLC. The reaction was quenched by water (10 mL), extracted by DCM (10 mL  $\times$  3), condensed and purified by flash column chromatography to give the desired ester.

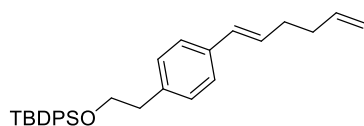

**(E)-tert-Butyl(4-(hexa-1,5-dien-1-yl)phenethoxy)diphenylsilane (26)**

Colorless oil, 95% yield.  $^1\text{H}$  NMR (500 MHz, chloroform-*d*)  $\delta$  7.61 – 7.56 (m, 4H), 7.40 (t,  $J = 7.3$  Hz, 2H), 7.34 (t,  $J = 7.4$  Hz, 4H), 7.23 (d,  $J = 7.8$  Hz, 2H), 7.06 (d,  $J = 7.8$  Hz, 2H), 6.37 (d,  $J = 15.8$  Hz, 1H), 6.23 – 6.12 (m, 1H), 5.92 – 5.81 (m, 1H), 5.09 – 4.96 (m, 2H), 3.82 (t,  $J = 6.9$  Hz, 2H), 2.82 (t,  $J = 6.9$  Hz, 2H), 2.34 – 2.26 (m, 2H), 2.22 (q,  $J = 7.1$  Hz, 2H), 1.02 (s, 9H).  $^{13}\text{C}$  NMR (126 MHz, chloroform-*d*)  $\delta$  138.4, 137.9, 135.8, 135.7, 133.9, 130.1, 129.6, 129.4, 129.4, 127.67, 125.9, 115.0, 65.3, 39.1, 33.7, 32.5, 26.9, 19.2. HRMS (ESI):  $[\text{M}+\text{NH}_4]^{\oplus}$  calcd for  $\text{C}_{30}\text{H}_{40}\text{ONSi}$  458.2874, found 458.2876.

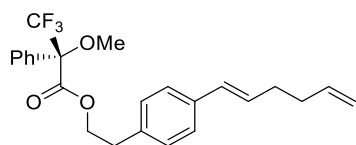

**(E) 4-(Hex-1-en-1-yl)phenethyl (S)-3,3,3-trifluoro-2-methoxy-2-phenylpropanoate (27)**

Colorless oil, 30% yield.  $^1\text{H}$  NMR (500 MHz, chloroform-*d*)  $\delta$  7.44 – 7.36 (m, 3H), 7.33 (dd,  $J = 8.2, 6.6$  Hz, 2H), 7.25 (d,  $J = 7.9$  Hz, 2H), 7.09 (d,  $J = 7.8$  Hz, 2H), 6.37 (d,  $J = 15.8$  Hz, 1H), 6.20 (dt,  $J = 15.7, 6.7$  Hz, 1H), 5.91 – 5.83 (m, 1H), 5.14 – 4.96 (m, 2H), 4.51 (t,  $J = 6.9$  Hz, 2H), 3.47 (s, 3H), 3.02 – 2.93 (m, 2H), 2.38 – 2.28 (m, 2H), 2.28 – 2.18 (m, 2H).  $^{13}\text{C}$  NMR (126 MHz, chloroform-*d*)  $\delta$  166.6, 138.2, 136.5, 135.7, 132.3, 130.1, 129.9, 129.6, 129.1, 128.5, 127.3, 126.2, 115.0, 66.9, 55.5, 51.0 (q,  $J = 2.52$  Hz), 34.5, 33.6, 32.5 (the carbon signal of  $\text{CF}_3$  was not observed).  $^{19}\text{F}$  NMR (376 MHz, Chloroform-*d*)  $\delta$  -71.69. HRMS (ESI):  $[\text{M}+\text{Na}]^{\oplus}$  calcd for  $\text{C}_{24}\text{H}_{25}\text{O}_3\text{F}_3\text{Na}^{\oplus}$  441.1648, found 441.1647.

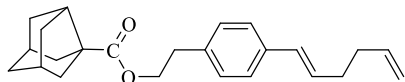

**4-((*E*)-Hexa-1,5-dien-1-yl)phenethyl-hexahydro-2,5-methanopentalene-3a(1*H*)-carboxylate (28)**

Yellow oil, 61% yield.  $^1\text{H}$  NMR (500 MHz, chloroform-*d*)  $\delta$  7.27 (d,  $J = 7.9$  Hz, 2H), 7.15 (d,  $J = 7.7$  Hz, 2H), 6.38 (d,  $J = 15.8$  Hz, 1H), 6.20 (dt,  $J = 15.7, 6.7$  Hz, 1H), 5.93 – 5.80 (m, 1H), 5.11 – 4.96 (m, 2H), 4.27 (t,  $J = 6.8$  Hz, 2H), 2.91 (t,  $J = 6.9$  Hz, 2H), 2.59 (t,  $J = 6.8$  Hz, 1H), 2.35 – 2.19 (m, 6H), 2.07 – 1.97 (m, 2H), 1.81 – 1.71 (m, 4H), 1.65 – 1.52 (m, 4H).  $^{13}\text{C}$  NMR (126 MHz, chloroform-*d*)  $\delta$  177.6, 138.2, 136.9, 136.1, 129.9, 129.7, 129.2, 126.0, 115.0, 64.8, 53.8, 46.9, 44.1, 43.7, 37.5, 35.0, 34.8, 33.6, 32.5. HRMS (ESI):  $[\text{M}+\text{Na}]^{\oplus}$  calcd for  $\text{C}_{24}\text{H}_{30}\text{O}_2\text{Na}^{\oplus}$  373.2138, found 373.2137.

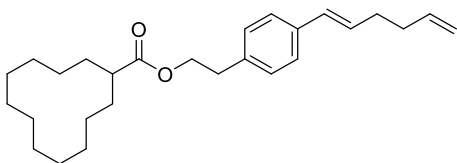

**(*E*)-4-(Hexa-1,5-dien-1-yl)phenethyl cyclododecanecarboxylate (29)**

Colorless oil, 83% yield.  $^1\text{H}$  NMR (500 MHz, chloroform-*d*)  $\delta$  7.25 (d,  $J = 7.8$  Hz, 2H), 7.12 (d,  $J = 7.8$  Hz, 2H), 6.18 (dt,  $J = 15.7, 6.7$  Hz, 1H), 5.01 (dd,  $J = 32.7, 13.6$  Hz, 2H), 4.25 (t,  $J = 7.0$  Hz, 2H), 2.88 (t,  $J = 7.0$  Hz, 2H), 2.47 – 2.42 (m, 1H), 2.31 – 2.27 (m, 2H), 2.23 – 2.19 (m, 2H), 1.58 – 1.54 (m, 4H), 1.35 – 1.26 (m, 18H).  $^{13}\text{C}$  NMR (126 MHz, chloroform-*d*)  $\delta$  176.5, 138.0, 136.6, 136.1, 129.9, 129.6, 129.0, 126.0, 114.9, 64.5, 40.3, 34.9, 33.6, 32.4, 26.6, 23.7, 23.5, 23.5, 23.4, 22.3. HRMS (ESI):  $[\text{M}+\text{Na}]^{\oplus}$  calcd for  $\text{C}_{27}\text{H}_{40}\text{O}_2\text{Na}^{\oplus}$  419.2921, found 419.2920.

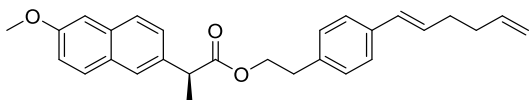

**(*E*)-4-(Hexa-1,5-dien-1-yl)phenethyl (*S*)-2-(6-methoxynaphthalen-2-yl)propanoate (9)**

White solid, 68% yield.  $^1\text{H}$  NMR (500 MHz, chloroform-*d*)  $\delta$  7.67 (d,  $J = 8.6$  Hz, 2H), 7.61 (s, 1H), 7.35 (dd,  $J = 8.5, 1.8$  Hz, 1H), 7.16 – 7.07 (m, 4H), 6.94 (d,  $J = 7.8$  Hz, 2H), 6.31 (d,  $J = 15.8$  Hz, 1H), 6.13 (dt,  $J = 15.8, 6.7$  Hz, 1H), 5.92 – 5.80 (m, 1H), 5.10 – 4.94 (m, 2H), 4.32 – 4.19 (m, 2H), 3.92 (s, 3H), 3.86 – 3.78 (m, 1H), 2.88 – 2.75 (m, 2H), 2.34 – 2.26 (m, 2H), 2.26 – 2.19 (m, 2H), 1.55 (d,  $J = 7.2$  Hz, 3H).  $^{13}\text{C}$  NMR (126 MHz, chloroform-*d*)  $\delta$  174.6, 157.7, 138.2, 136.5, 136.0, 135.7, 133.8, 129.9, 129.7, 129.4, 129.1, 129.0, 127.2, 126.3, 126.1, 126.0, 119.0, 115.0, 105.6, 65.3, 55.4, 45.6, 34.7, 33.7, 32.5, 18.4. HRMS (ESI):  $[\text{M}+\text{Na}]^{\oplus}$  calcd for  $\text{C}_{28}\text{H}_{30}\text{O}_3\text{Na}^{\oplus}$  437.2087, found 437.2087.

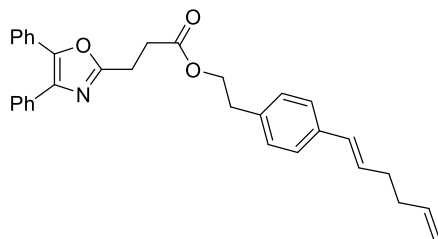

**(E)-4-(Hexa-1,5-dien-1-yl)phenethyl (S)-2-(6-methoxynaphthalen-2-yl)propanoate (30)**

Colorless oil, 60% yield.  $^1\text{H}$  NMR (500 MHz, chloroform-*d*)  $\delta$  7.66 – 7.60 (m, 2H), 7.59 – 7.54 (m, 2H), 7.39 – 7.28 (m, 6H), 7.25 (d,  $J = 7.9$  Hz, 2H), 7.12 (d,  $J = 7.8$  Hz, 2H), 6.35 (d,  $J = 15.8$  Hz, 1H), 6.17 (dt,  $J = 15.8, 6.7$  Hz, 1H), 5.89 – 5.81 (m, 1H), 5.05 (dd,  $J = 17.3, 1.9$  Hz, 1H), 4.99 (d,  $J = 10.1$  Hz, 1H), 4.32 (t,  $J = 7.0$  Hz, 2H), 3.16 (t,  $J = 7.5$  Hz, 2H), 2.94 – 2.86 (m, 4H), 2.31 – 2.27 (m, 2H), 2.24 – 2.19 (m, 2H).  $^{13}\text{C}$  NMR (126 MHz, chloroform-*d*)  $\delta$  172.0, 161.8, 154.4, 145.5, 138.2, 136.4, 136.2, 135.2, 132.5, 129.9, 129.1, 129.0, 128.7, 128.6, 128.5, 128.1, 127.9, 126.5, 126.1, 115.0, 65.3, 34.8, 33.6, 32.5, 31.2, 23.6. HRMS (ESI):  $[\text{M}+\text{H}]^{\oplus}$  calcd for  $\text{C}_{32}\text{H}_{32}\text{NO}_3^{\oplus}$  478.2377, found 478.2377.

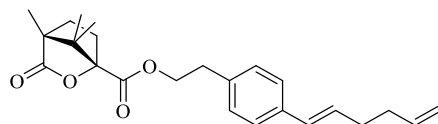

**4-(E)-Hexa-1,5-dien-1-ylphenethyl (1S,4R)-4,7,7-trimethyl-3-oxo-2-oxabicyclo[2.2.1]heptane-1-carboxylate (31)**

Yellow solid, 63% yield.  $^1\text{H}$  NMR (500 MHz, chloroform-*d*)  $\delta$  7.28 (d,  $J = 8.1$  Hz, 2H), 7.15 (d,  $J = 7.8$  Hz, 2H), 6.37 (d,  $J = 15.8$  Hz, 1H), 6.20 (dt,  $J = 15.5, 6.7$  Hz, 1H), 5.91 – 5.80 (m, 1H), 5.10 – 5.02 (m, 1H), 5.02 – 4.96 (m, 1H), 4.44 (t,  $J = 7.0$  Hz, 2H), 2.98 (t,  $J = 7.0$  Hz, 2H), 2.40 – 2.19 (m, 5H), 2.03 – 1.94 (m, 1H), 1.94 – 1.84 (m, 1H), 1.71 – 1.62 (m, 1H), 1.09 (s, 3H), 0.96 (s, 3H), 0.86 (s, 3H).  $^{13}\text{C}$  NMR (126 MHz, chloroform-*d*)  $\delta$  178.2, 167.5, 138.1, 136.4, 135.7, 130.0, 129.8, 129.1, 126.2, 115.0, 91.2, 65.9, 54.8, 54.2, 34.7, 33.6, 32.5, 30.7, 29.0, 16.71, 16.66, 9.7. HRMS (ESI):  $[\text{M}+\text{Na}]^{\oplus}$  calcd for  $\text{C}_{24}\text{H}_{30}\text{O}_4\text{Na}^{\oplus}$  405.2036, found 405.2036.

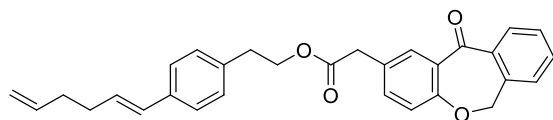

**(E)-4-(Hexa-1,5-dien-1-yl)phenethyl 2-(11-oxo-6,11-dihydrodibenzo[b,e]oxepin-2-yl)acetate (32)**

Colorless oil, 63% yield.  $^1\text{H}$  NMR (500 MHz, chloroform-*d*)  $\delta$  8.10 (d,  $J = 2.4$  Hz, 1H), 7.89 (d,  $J = 7.6$  Hz, 1H), 7.56 – 7.49 (m, 1H), 7.48 – 7.41 (m, 1H), 7.36 – 7.31 (m, 2H), 7.23 (d,  $J = 7.9$  Hz, 2H), 7.07 (d,  $J = 7.8$  Hz, 2H), 6.98 (d,  $J = 8.4$  Hz, 1H), 6.34 (d,  $J = 15.8$  Hz, 1H), 6.17 (dt,  $J = 15.7, 6.7$  Hz, 1H), 5.90 – 5.78 (m, 1H), 5.15 (s, 2H), 5.09 – 5.02 (m, 1H), 5.02 – 4.96 (m, 1H), 4.28 (t,  $J = 6.9$  Hz, 2H), 3.60 (s, 2H), 2.88 (t,  $J = 6.9$  Hz, 2H), 2.32 – 2.25 (m, 2H), 2.25 – 2.17 (m, 2H).  $^{13}\text{C}$  NMR (126 MHz, chloroform-*d*)  $\delta$  190.7, 171.3, 160.4, 140.4, 138.1, 136.3, 136.3, 136.1, 135.6, 132.7, 132.5, 129.8, 129.7, 129.5, 129.2,

129.0, 127.8, 127.8, 126.1, 125.1, 121.0, 114.9, 73.6, 65.4, 40.2, 34.7, 33.6, 32.4. HRMS (ESI):  $[M+H]^+$  calcd for  $C_{30}H_{29}O_4^+$  453.2060, found 453.2061.

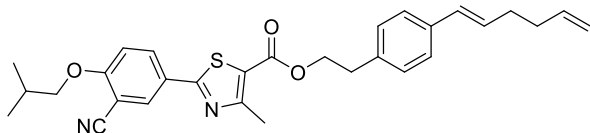

**(E)-4-(Hexa-1,5-dien-1-yl)phenethyl 2-(3-cyano-4-isobutoxyphenyl)-4-methylthiazole-5-carboxylate (33)**

White solid, 43% yield.  $^1H$  NMR (500 MHz, chloroform-*d*)  $\delta$  8.17 – 8.13 (m, 1H), 8.10 – 8.04 (m, 1H), 7.30 (d,  $J = 7.7$  Hz, 2H), 7.19 (d,  $J = 7.7$  Hz, 2H), 7.00 (d,  $J = 8.9$  Hz, 1H), 6.38 (d,  $J = 15.8$  Hz, 1H), 6.21 (dt,  $J = 15.4, 6.8$  Hz, 1H), 5.92 – 5.79 (m, 1H), 5.13 – 4.94 (m, 2H), 4.48 (t,  $J = 6.8$  Hz, 2H), 3.89 (d,  $J = 6.5$  Hz, 2H), 3.02 (t,  $J = 6.8$  Hz, 2H), 2.71 (s, 3H), 2.34 – 2.26 (m, 2H), 2.26 – 2.14 (m, 3H), 1.09 (d,  $J = 6.7$  Hz, 6H).  $^{13}C$  NMR (126 MHz, chloroform-*d*)  $\delta$  167.3, 162.5, 161.9, 161.3, 138.1, 136.3, 136.2, 132.6, 132.1, 129.9, 129.8, 129.1, 126.2, 126.0, 121.7, 115.4, 115.0, 112.6, 102.9, 75.7, 65.8, 34.8, 34.8, 33.6, 32.4, 28.2, 19.1, 17.5. HRMS (ESI):  $[M+H]^+$  calcd for  $C_{30}H_{33}O_3N_2S^+$  501.2206, found 501.2208.

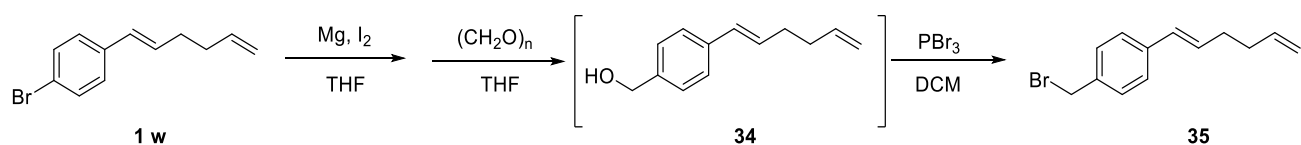

**(E)-1-(Bromomethyl)-4-(hexa-1,5-dien-1-yl)benzene (35):** To a 100 mL flask with a magnetic stirring bar were added Mg (0.48 g) activated by HCl and  $I_2$  (25 mg). The reaction was stirred at 60 °C for 5 min. Then **1w** (2.4 g, 10 mmol) in dry THF (20 mL) was added to the solution and the resulting mixture was stirred at 60 °C for 1 h before  $(CH_2O)_n$  (4.5 g, 15 mmol) was added to the reaction under nitrogen. After stirring at 60 °C for 5 h, the reaction was quenched by saturated aqueous NaCl solution (20 mL), extracted by ethyl acetate (20 mL  $\times$  3), condensed and purified by flash column chromatography to give the phenol product **34**. To a 100 mL flask with all the isolated **34** above and DCM (20 mL) was added  $PBr_3$  (0.8 g, 3 mmol) dropwise at -20 °C. After stirring at -20 °C for 5 h, the reaction was condensed and purified by flash column chromatography to give pure compound **35** as a colorless oil in 27% yield.  $^1H$  NMR (500 MHz, chloroform-*d*)  $\delta$  7.36 – 7.28 (m, 4H), 6.39 (d,  $J = 16.0$  Hz, 1H), 6.25 (dt,  $J = 15.7, 6.7$  Hz, 1H), 5.90 – 5.82 (m, 1H), 5.08 – 4.99 (m, 2H), 4.51 – 4.49 (m, 2H), 2.34 – 2.21 (m, 4H).  $^{13}C$  NMR (126 MHz, chloroform-*d*)  $\delta$  131.2, 129.7, 129.4, 129.4, 128.9, 126.4, 120.1, 115.1, 33.8, 33.5, 32.5. HRMS (EI):  $[M]^+$  calcd for  $C_{13}H_{15}Br^+$  250.0352, found 250.0346.

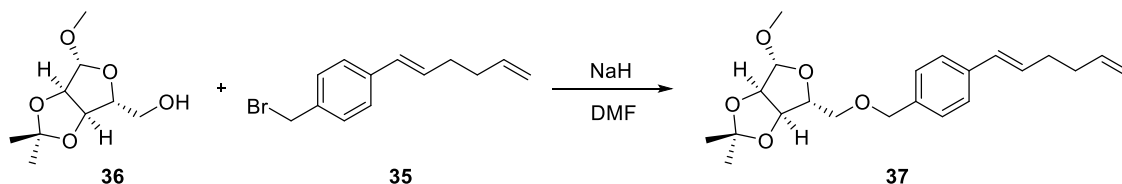

**(3aR,4R,6R,6aR)-4-(((4-((E)-Hexa-1,5-dien-1-yl)benzyl)oxy)methyl)-6-methoxy-2,2-dimethyltetrahydrofuro[3,4-*d*][1,3]dioxole (37):** To a 25 mL Schlenk tube with **36** (0.41 g, 2.0 mmol) and DMF (5 mL) was added NaH (48 mg, 2.0 mmol) under nitrogen. The reaction was stirred at room temperature for 1 h. Then **35** (0.50 g, 2.0 mmol) was added to the solution. The resulting mixture continued

to stir at room temperature for 6 h. After this time, the reaction was quenched by saturated NaCl solution (5 mL), extracted by ethyl acetate (20 mL  $\times$  3), condensed and purified by flash column chromatography to give diene compound **37** as a white solid in 61% yield.  $^1\text{H}$  NMR (500 MHz, chloroform-*d*)  $\delta$  7.32 (d,  $J$  = 7.9 Hz, 2H), 7.26 (d,  $J$  = 7.9 Hz, 2H), 6.39 (d,  $J$  = 15.8 Hz, 1H), 6.23 (dt,  $J$  = 15.9, 6.7 Hz, 1H), 5.92 – 5.81 (m, 1H), 5.10 – 5.03 (m, 1H), 5.03 – 4.97 (m, 1H), 4.96 (s, 1H), 4.67 (d,  $J$  = 6.0 Hz, 1H), 4.56 (d,  $J$  = 6.1 Hz, 1H), 4.52 (d,  $J$  = 1.6 Hz, 2H), 4.39 – 4.33 (m, 1H), 3.53 – 3.47 (m, 1H), 3.47 – 3.40 (m, 1H), 3.29 (s, 3H), 2.35 – 2.27 (m, 2H), 2.27 – 2.19 (m, 2H), 1.48 (s, 3H), 1.31 (s, 3H).  $^{13}\text{C}$  NMR (126 MHz, chloroform-*d*)  $\delta$  138.2, 137.4, 136.7, 130.3, 129.9, 128.0, 126.1, 115.0, 112.5, 109.3, 85.2, 85.2, 82.2, 73.1, 71.0, 54.9, 33.6, 32.5, 26.5, 25.1. HRMS (EI):  $[\text{M}]^{\oplus}$  calcd for  $\text{C}_{22}\text{H}_{30}\text{O}_5^{\oplus}$  374.2097, found 374.2094.

### 3. Development of reaction conditions

#### 3.1 Evaluation of chiral ligands

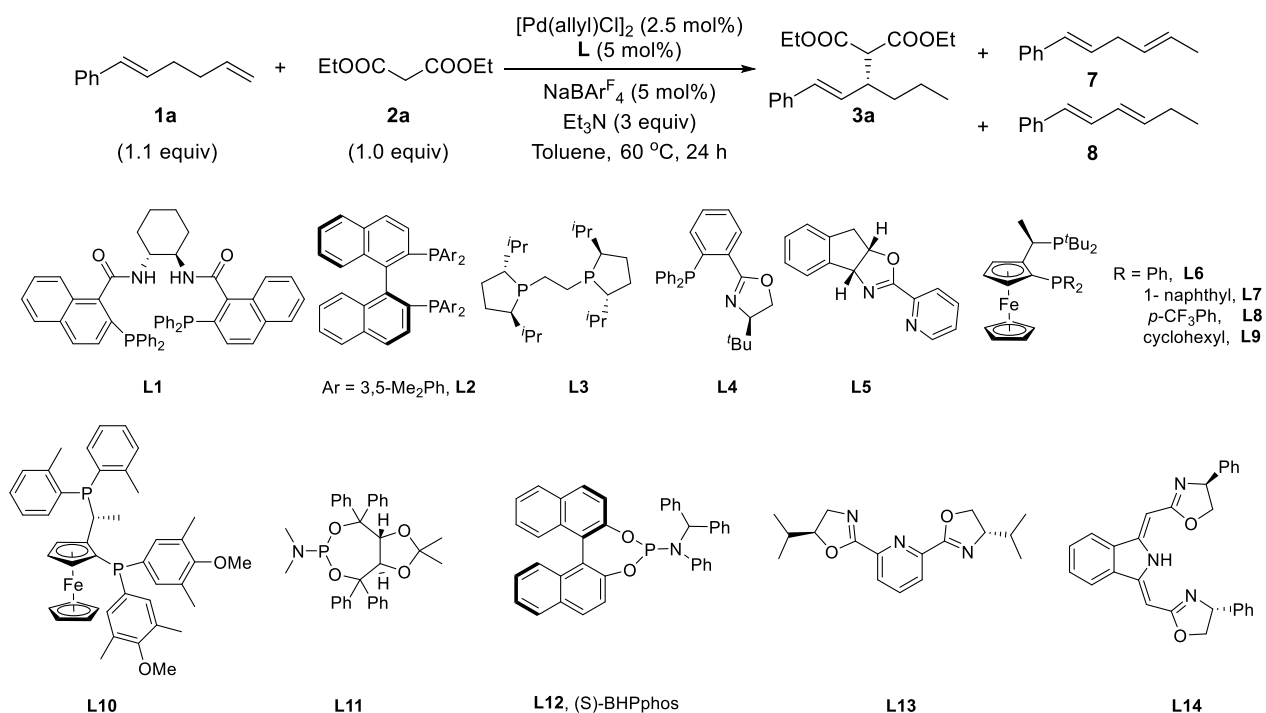

| Entry | L         | <b>7</b> (%) <sup>a</sup> | <b>8</b> (%) <sup>a</sup> | Yield (%) <sup>a</sup> | er <sup>b</sup> |
|-------|-----------|---------------------------|---------------------------|------------------------|-----------------|
| 1     | <b>L1</b> | 18                        | 0                         | 0                      |                 |
| 2     | <b>L2</b> | 0                         | 0                         | 8                      | 62:38           |
| 3     | <b>L3</b> | 22                        | 2                         | 0                      |                 |
| 4     | <b>L4</b> | 22                        | 2                         | 0                      |                 |
| 5     | <b>L5</b> | 0                         | 2                         | 0                      |                 |

|    |            |    |    |    |       |
|----|------------|----|----|----|-------|
| 6  | <b>L6</b>  | 14 | 14 | 23 | 95:5  |
| 7  | <b>L7</b>  | 11 | 13 | 21 | 90:10 |
| 8  | <b>L8</b>  | 7  | 3  | 21 | 97:3  |
| 9  | <b>L9</b>  | 9  | 12 | 29 | 97:3  |
| 10 | <b>L10</b> | 7  | 18 | 10 | 44:56 |
| 11 | <b>L11</b> | 12 | 4  | 0  |       |
| 12 | <b>L12</b> | 31 | 6  | 0  |       |
| 13 | <b>L13</b> | 18 | 0  | 0  |       |
| 14 | <b>L14</b> | 20 | 0  | 0  |       |

**Supplementary Fig. 1.** <sup>a</sup>Determined by crude <sup>1</sup>H NMR. <sup>b</sup>Determined by chiral HPLC.

### 3.2 Evaluation of solvents and temperatures

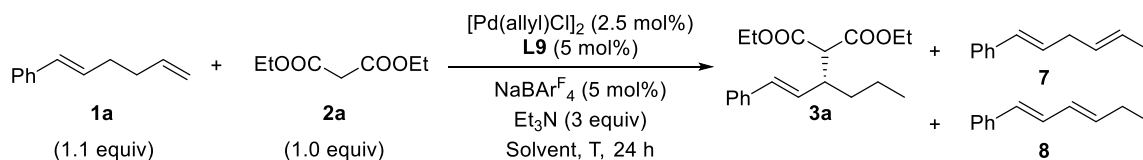

| Entry | Solvent            | T / °C | <b>7</b> (%) <sup>a</sup> | <b>8</b> (%) <sup>a</sup> | Yield (%) <sup>a</sup> | er <sup>c</sup> |
|-------|--------------------|--------|---------------------------|---------------------------|------------------------|-----------------|
| 1     | DCM                | 60     | 4                         | 9                         | Trace                  | 74:26           |
| 2     | THF                | 60     | 11                        | 12                        | Trace                  | 89:11           |
| 3     | CH <sub>3</sub> CN | 60     | 0                         | 0                         | 0                      |                 |
| 4     | DMF                | 60     | 0                         | 0                         | 0                      |                 |
| 5     | Hexane             | 60     | 5                         | 8                         | 52                     | 96.5:3.5        |
| 6     | CPME               | 60     | 6                         | 10                        | 34                     | 97:3            |
| 7     | Et <sub>3</sub> N  | 60     | 0                         | 8                         | 91 (82) <sup>b</sup>   | 97:3            |
| 8     | Et <sub>3</sub> N  | 40     | 4                         | 2                         | 76                     | 96:4            |
| 9     | Et <sub>3</sub> N  | 80     | 7                         | 24                        | 60                     | 94:6            |

**Supplementary Fig. 2.** <sup>a</sup>Determined by crude <sup>1</sup>H NMR. <sup>b</sup>Isolated yield. <sup>c</sup>Determined by chiral HPLC.

### 4. General procedure for Pd-catalyzed migratory allylic functionalization

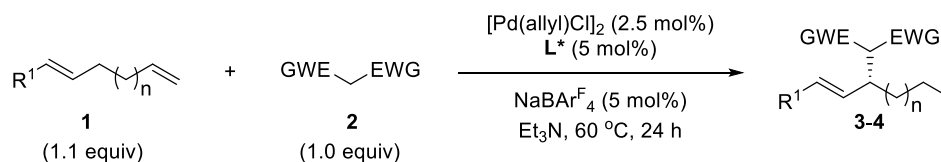

General procedure: To a 4 mL vial in the glovebox under nitrogen were added [Pd(allyl)Cl]<sub>2</sub> (1.8 mg, 0.0050 mmol), **L** (5.6 mg, 0.010 mmol), sodium tetrakis[3,5-bis(trifluoromethyl)phenyl]borate (NaBARF<sub>4</sub>, 8.8 mg, 0.010 mmol) and dry Et<sub>3</sub>N (0.2 mL). The mixture was stirred at room temperature for 5 min. Then the remote diene **1** (0.22 mmol) was added to the solution and the reaction continued to stir for 1 min. Finally, the nucleophile **2** (0.20 mmol) was added to the reaction and the resulting mixture was stirred at 60 °C for 24 h. After this time, the crude mixture was cooled to room temperature, condensed and crude <sup>1</sup>H NMR was obtained with dibromomethane (7 μL, 0.1 mmol) as internal standard to help determine the regioselectivity and conversion. The reaction was further purified by flash column chromatography to afford the pure allylation product **3-4**.

Notice: all the racemic products were prepared by using the racemic ligand **L6** under the standard catalytic conditions.

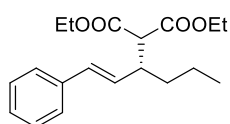

### Diethyl (*R,E*)-2-(1-phenylhex-1-en-3-yl)malonate (**3a**)

Colorless oil, 82% yield, [ $\alpha$ ]<sub>D</sub><sup>25</sup> +41.4 (*c* 2.1, CHCl<sub>3</sub>) for 97:3 er; <sup>1</sup>H NMR (500 MHz, chloroform-*d*)  $\delta$  7.33 (d, *J* = 7.1 Hz, 2H), 7.28 (t, *J* = 7.7 Hz, 2H), 7.23 – 7.18 (m, 1H), 6.43 (d, *J* = 15.8 Hz, 1H), 6.04 (dd, *J* = 15.8, 9.7 Hz, 1H), 4.20 (q, *J* = 7.2 Hz, 2H), 4.16 – 4.08 (m, 2H), 3.41 (d, *J* = 8.8 Hz, 1H), 2.98 – 2.92 (m, 1H), 1.54 – 1.48 (m, 1H), 1.46 – 1.36 (m, 2H), 1.30 – 1.25 (m, 4H), 1.17 (t, *J* = 7.1 Hz, 3H), 0.89 (t, *J* = 7.1 Hz, 3H). <sup>13</sup>C NMR (126 MHz, chloroform-*d*)  $\delta$  168.4, 168.3, 137.1, 132.4, 129.9, 128.5, 127.3, 126.3, 61.4, 61.2, 57.3, 43.4, 35.1, 20.4, 14.2, 13.9 (one alkyl carbon signal was not observed because of overlapping). HRMS (EI): [*M*]<sup>+</sup> calcd for C<sub>19</sub>H<sub>26</sub>O<sub>4</sub><sup>+</sup> 318.1826, found 318.1830. HPLC analysis: Chiracel AD-H column; detected at 254 nm, 40 °C; 1% *i*PrOH in *n*-Hexane; flow = 0.7 mL/min; Retention time: 20.7 min (major), 25.2 min (minor).

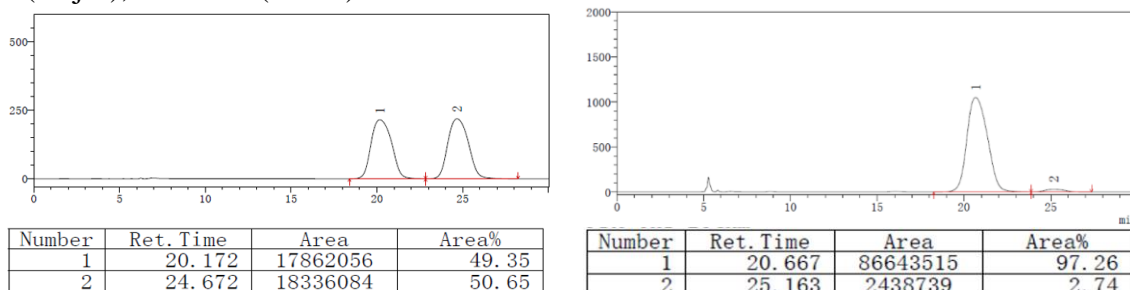

Supplementary Fig. 3. HPLC of **3a**.

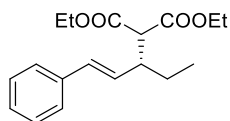

### Diethyl (*R,E*)-2-(1-phenylpent-1-en-3-yl)malonate (**3b**)

Colorless oil, 76% yield, [ $\alpha$ ]<sub>D</sub><sup>25</sup> +49.8 (*c* 1.6, CHCl<sub>3</sub>) for 96:4 er; <sup>1</sup>H NMR (500 MHz, chloroform-*d*)  $\delta$  7.36 – 7.26 (m, 4H), 7.25 – 7.18 (m, 1H), 6.45 (d, *J* = 15.7 Hz, 1H), 6.03 (dd, *J* = 15.7, 9.6 Hz, 1H), 4.23

– 4.17 (m, 2H), 4.15 – 4.07 (m, 2H), 3.43 (d,  $J = 8.8$  Hz, 1H), 2.89 – 2.82 (m, 1H), 1.68 – 1.58 (m, 1H), 1.48 – 1.37 (m, 1H), 1.26 (t,  $J = 7.1$  Hz, 3H), 1.17 (t,  $J = 7.1$  Hz, 3H), 0.92 (t,  $J = 7.4$  Hz, 3H).  $^{13}\text{C}$  NMR (126 MHz, chloroform- $d$ )  $\delta$  168.5, 168.3, 137.1, 132.7, 129.6, 128.5, 127.4, 126.3, 61.4, 61.2, 57.1, 45.3, 25.9, 14.2, 11.8 (one alkyl carbon signal was not observed because of overlapping). HRMS (ESI):  $[\text{M}+\text{Na}]^{\oplus}$  calcd for  $\text{C}_{18}\text{H}_{24}\text{O}_4\text{Na}^{\oplus}$  327.1567, found 327.1567. HPLC analysis: Chiracel (AD-H)+(AD-H) column; detected at 254 nm, 20 °C; 1%  $i$ PrOH in  $n$ -Hexane; flow = 0.7 mL/min; Retention time: 15.6 min (major), 19.1 min (minor).

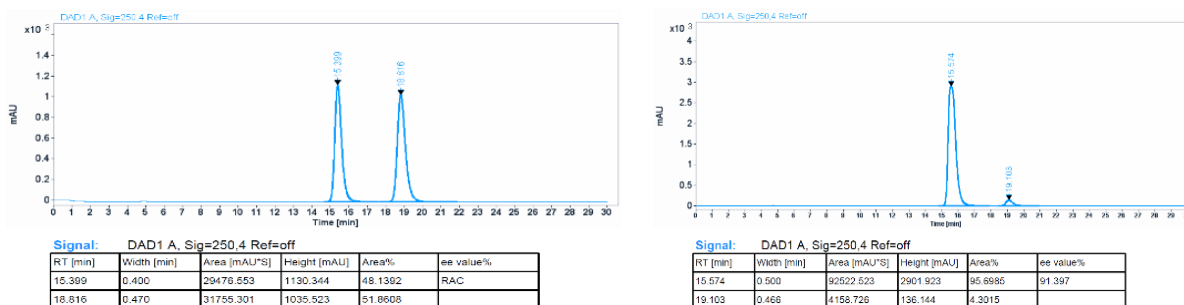

Supplementary Fig. 4. HPLC of 3b.

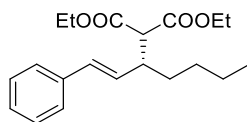

### Diethyl (*R,E*)-2-(1-phenylhept-1-en-3-yl)malonate (3c)

Colorless oil, 72% yield,  $[\alpha]_{\text{D}}^{25} +36.8$  ( $c$  1.7,  $\text{CHCl}_3$ ) for 97:3 er;  $^1\text{H}$  NMR (500 MHz, chloroform- $d$ )  $\delta$  7.36 – 7.27 (m, 4H), 7.23 – 7.18 (m, 1H), 6.43 (d,  $J = 15.8$  Hz, 1H), 6.04 (dd,  $J = 15.7, 9.6$  Hz, 1H), 4.24 – 4.17 (m, 2H), 4.15 – 4.08 (m, 2H), 3.41 (d,  $J = 8.9$  Hz, 1H), 2.96 – 2.89 (m, 1H), 1.59 – 1.50 (m, 1H), 1.44 – 1.37 (m, 1H), 1.36 – 1.30 (m, 2H), 1.29 – 1.23 (m, 5H), 1.17 (t,  $J = 7.1$  Hz, 3H), 0.86 (t,  $J = 6.4$  Hz, 3H).  $^{13}\text{C}$  NMR (126 MHz, chloroform- $d$ )  $\delta$  168.5, 168.3, 137.2, 132.4, 130.0, 128.5, 127.4, 126.3, 61.4, 61.3, 57.4, 43.6, 32.7, 29.4, 22.5, 14.2, 14.0 (one alkyl carbon signal was not observed because of overlapping). HRMS (EI):  $[\text{M}]^{\oplus}$  calcd for  $\text{C}_{20}\text{H}_{28}\text{O}_4^{\oplus}$  332.1982, found 332.1984. HPLC analysis: Chiralpak IE column; detected at 254 nm, 30 °C; 10%  $i$ PrOH in  $n$ -Hexane; flow = 0.7 mL/min; Retention time: 7.6 min (minor), 8.0 min (major).



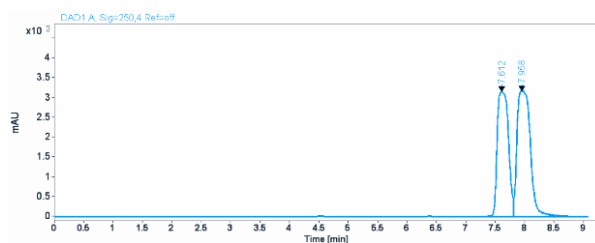

Signal: DAD1 A, Sig=250.4 Ref=off

| RT [min] | Width [min] | Area [mAU*S] | Height [mAU] | Area%   | ee value% |
|----------|-------------|--------------|--------------|---------|-----------|
| 7.612    | 0.214       | 41761.078    | 3150.719     | 45.3169 | RAC       |
| 7.958    | 0.255       | 50392.266    | 3169.843     | 54.6831 |           |

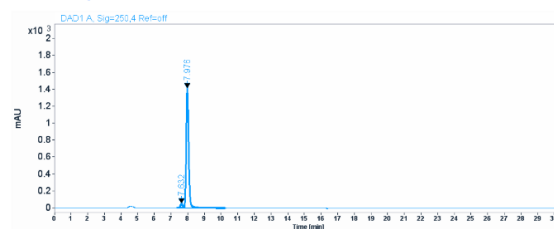

Signal: DAD1 A, Sig=250.4 Ref=off

| RT [min] | Width [min] | Area [mAU*S] | Height [mAU] | Area%   | ee value% |
|----------|-------------|--------------|--------------|---------|-----------|
| 7.632    | 0.143       | 457.090      | 49.850       | 3.0410  | 93.918    |
| 7.976    | 0.157       | 14573.830    | 1407.607     | 96.9590 |           |

Supplementary Fig. 5. HPLC of 3c.

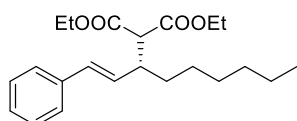

### Diethyl (*R,E*)-2-(1-phenylnon-1-en-3-yl)malonate (**3d**)

Colorless oil, 72% yield,  $[\alpha]_D^{25} +28.1$  ( $c$  1.6,  $\text{CHCl}_3$ ) for 97:3 er;  $^1\text{H}$  NMR (500 MHz, chloroform- $d$ )  $\delta$  7.39 – 7.34 (m, 2H), 7.34 – 7.29 (m, 2H), 7.27 – 7.21 (m, 1H), 6.46 (d,  $J = 15.8$  Hz, 1H), 6.06 (dd,  $J = 15.8, 9.7$  Hz, 1H), 4.26 – 4.21 (m, 2H), 4.18 – 4.10 (m, 2H), 3.45 (s, 1H), 2.99 – 2.93 (m, 1H), 1.61 – 1.51 (m, 1H), 1.48 – 1.25 (m, 12H), 1.20 (t,  $J = 7.1$  Hz, 3H), 0.89 (t,  $J = 6.9$  Hz, 3H).  $^{13}\text{C}$  NMR (126 MHz, chloroform- $d$ )  $\delta$  168.5, 168.3, 137.2, 132.4, 129.9, 128.5, 127.3, 126.3, 61.4, 61.2, 57.4, 43.7, 32.9, 31.8, 29.1, 27.2, 22.7, 14.2, 14.1 (one alkyl carbon signal was not observed because of overlapping). HRMS (EI):  $[\text{M}]^{\oplus}$  calcd for  $\text{C}_{22}\text{H}_{32}\text{O}_4^{\oplus}$  360.2295, found 360.2298. HPLC analysis: Chiralcel AD-H column; detected at 254 nm, 40 °C; 1%  $i$ PrOH in  $n$ -Hexane; flow = 0.7 mL/min; Retention time: 28.7 min (major), 30.0 min (minor).

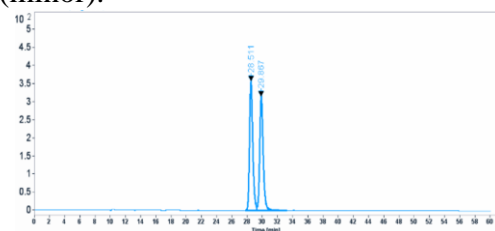

| RT [min] | Width [min] | Area [mAU*S] | Height [mAU] | Area%   | ee value% |
|----------|-------------|--------------|--------------|---------|-----------|
| 28.511   | 0.450       | 10522.397    | 356.638      | 51.2824 | 2.565     |
| 29.967   | 0.480       | 9996.132     | 314.837      | 48.7176 |           |

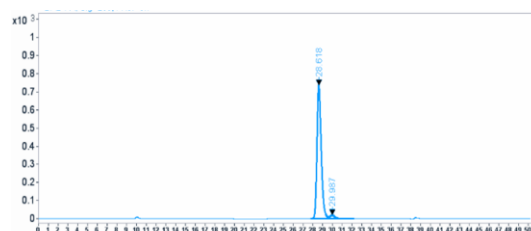

| RT [min] | Width [min] | Area [mAU*S] | Height [mAU] | Area%   | ee value% |
|----------|-------------|--------------|--------------|---------|-----------|
| 28.618   | 0.451       | 22038.631    | 735.772      | 96.7059 | 93.412    |
| 29.987   | 0.552       | 750.710      | 19.822       | 3.2941  |           |

Supplementary Fig. 6. HPLC of 3d.

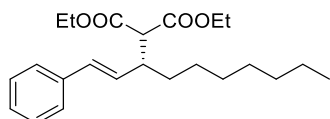

### Diethyl (*R,E*)-2-(1-phenyldec-1-en-3-yl)malonate (**3e**)

Colorless oil, 62% yield,  $[\alpha]_{\text{D}}^{25} +26.3$  ( $c$  1.7,  $\text{CHCl}_3$ ) for 98:2 er;  $^1\text{H}$  NMR (500 MHz, chloroform- $d$ )  $\delta$  7.35 – 7.32 (m, 2H), 7.31 – 7.26 (m, 2H), 7.24 – 7.16 (m, 1H), 6.43 (d,  $J$  = 15.8 Hz, 1H), 6.03 (dd, 1H), 4.23 – 4.17 (m, 2H), 4.15 – 4.07 (m, 2H), 3.41 (d,  $J$  = 8.8 Hz, 1H), 2.96 – 2.90 (m, 1H), 1.59 – 1.49 (m, 1H), 1.45 – 1.20 (m, 14H), 1.17 (t,  $J$  = 7.1 Hz, 3H), 0.86 (t,  $J$  = 6.9 Hz, 3H).  $^{13}\text{C}$  NMR (126 MHz,  $\text{CDCl}_3$ )  $\delta$  168.5, 168.3, 137.2, 132.4, 130.0, 128.5, 127.3, 126.3, 61.4, 61.2, 57.4, 43.7, 32.9, 31.9, 29.4, 29.2, 27.2, 22.7, 14.2, 14.1 (one alkyl carbon signal was not observed because of overlapping). HRMS (EI):  $[\text{M}]^{\oplus}$  calcd for  $\text{C}_{23}\text{H}_{34}\text{O}_4$  374.2452, found 374.2458. HPLC analysis: Chiralpak IE column; detected at 254 nm, 40 °C; 10%  $i$ PrOH in  $n$ -Hexane; flow = 0.7 mL/min; Retention time: 6.8 min (minor), 7.1 min (major).

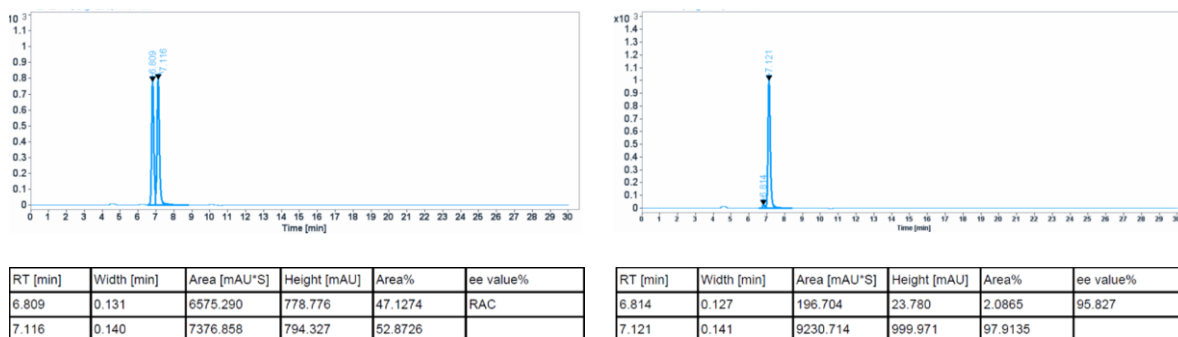

Supplementary Fig. 7. HPLC of 3e.

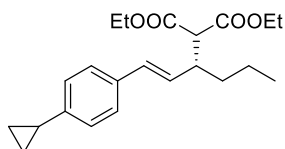

### Diethyl (*R,E*)-2-(1-(4-cyclopropylphenyl)hex-1-en-3-yl)malonate (3f)

Colorless oil, 91% yield,  $[\alpha]_{\text{D}}^{25} +40.6$  ( $c$  2.5,  $\text{CHCl}_3$ ) for 97:3 er;  $^1\text{H}$  NMR (500 MHz, chloroform- $d$ )  $\delta$  7.25 – 7.19 (m, 2H), 7.01 – 6.95 (m, 2H), 6.39 (d,  $J$  = 15.7 Hz, 1H), 5.95 (dd,  $J$  = 15.7, 9.7 Hz, 1H), 4.23 – 4.17 (m, 2H), 4.14 – 4.07 (m, 2H), 3.39 (d,  $J$  = 9.0 Hz, 1H), 2.95 – 2.89 (m, 1H), 1.89 – 1.83 (m, 1H), 1.54 – 1.45 (m, 1H), 1.45 – 1.33 (m, 2H), 1.26 (t,  $J$  = 7.1 Hz, 4H), 1.17 (t,  $J$  = 7.1 Hz, 3H), 0.98 – 0.90 (m, 2H), 0.88 (t,  $J$  = 7.2 Hz, 3H), 0.69 – 0.64 (m, 2H).  $^{13}\text{C}$  NMR (126 MHz,  $\text{CDCl}_3$ )  $\delta$  168.5, 168.3, 143.3, 134.4, 132.2, 128.7, 126.2, 125.8, 61.4, 61.2, 57.5, 43.5, 35.1, 20.4, 15.3, 14.21, 14.20, 13.9, 9.3 (one alkyl carbon signal was not observed because of overlapping). HRMS (EI):  $[\text{M}]^{\oplus}$  calcd for  $\text{C}_{22}\text{H}_{30}\text{O}_4$  358.2139, found 358.2142. HPLC analysis: Chiralcel AD-H column; detected at 254 nm, 40 °C; 2%  $i$ PrOH in  $n$ -Hexane; flow = 0.7 mL/min; Retention time: 14.9 min (major), 16.1 min (minor).

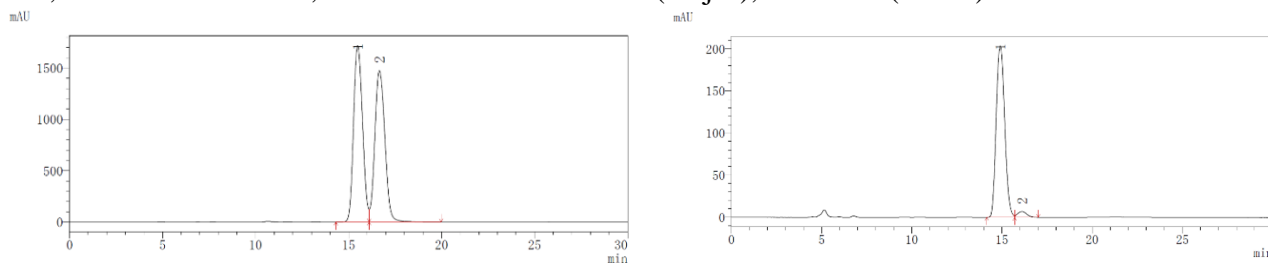

| Number | Ret. Time | Area     | Area% |
|--------|-----------|----------|-------|
| 1      | 15.487    | 57324029 | 50.80 |
| 2      | 16.657    | 55523754 | 49.20 |

| Number | Ret. Time | Area    | Area% |
|--------|-----------|---------|-------|
| 1      | 14.904    | 6690942 | 96.49 |
| 2      | 16.110    | 243590  | 3.51  |

Supplementary Fig. 8. HPLC of 3f.

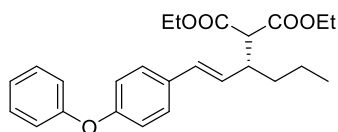

### Diethyl (*R,E*)-2-(1-(4-phenoxyphenyl)hex-1-en-3-yl)malonate (3g)

Colorless oil, 74% yield,  $[\alpha]_D^{25} +31.9$  (*c* 2.4, CHCl<sub>3</sub>) for 96:4 er; <sup>1</sup>H NMR (500 MHz, chloroform-*d*)  $\delta$  7.37 – 7.27 (m, 4H), 7.13 – 7.05 (m, 1H), 7.03 – 6.90 (m, 4H), 6.40 (d, *J* = 15.6 Hz, 1H), 6.03 – 5.86 (m, 1H), 4.26 – 4.01 (m, 4H), 3.48 – 3.33 (m, 1H), 3.00 – 2.84 (m, 1H), 1.56 – 1.46 (m, 1H), 1.45 – 1.34 (m, 2H), 1.30 – 1.23 (m, 4H), 1.18 (t, *J* = 7.3 Hz, 3H), 0.93 – 0.85 (m, 3H). <sup>13</sup>C NMR (126 MHz, CDCl<sub>3</sub>)  $\delta$  168.5, 168.3, 157.3, 156.6, 132.5, 131.6, 129.8, 129.0, 127.6, 123.3, 119.0, 118.8, 61.4, 61.2, 57.4, 43.4, 35.1, 20.4, 14.2, 13.9 (one alkyl carbon signal was not observed because of overlapping). HRMS (ESI):  $[M+Na]^+$  calcd for C<sub>25</sub>H<sub>30</sub>O<sub>5</sub>Na<sup>+</sup> 433.1985, found 433.1984. HPLC analysis: Chiralpak IE column; detected at 254 nm, 40 °C; 1% *i*PrOH in *n*-Hexane; flow = 0.7 mL/min; Retention time: 19.4 min (minor), 21.3 min (major).

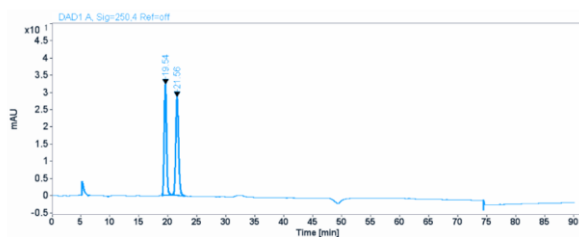

Signal: DAD1 A, Sig=250.4 Ref=off

| RT [min] | Width [min] | Area [mAU*S] | Height [mAU] | Area%   | ee value% |
|----------|-------------|--------------|--------------|---------|-----------|
| 19.540   | 0.450       | 916.633      | 32.247       | 48.6269 | RAC       |
| 21.560   | 0.524       | 968.399      | 28.563       | 51.3731 |           |

Method Description: IE-99-90-0, 7-40

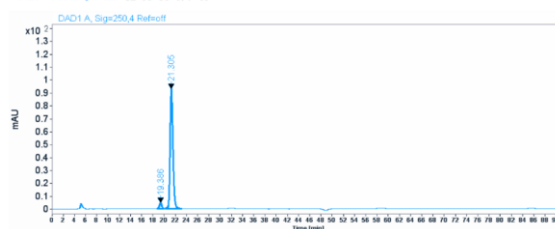

Signal: DAD1 A, Sig=250.4 Ref=off

| RT [min] | Width [min] | Area [mAU*S] | Height [mAU] | Area%   | ee value% |
|----------|-------------|--------------|--------------|---------|-----------|
| 19.386   | 0.448       | 122.460      | 4.272        | 3.6348  | 92.730    |
| 21.305   | 0.537       | 3246.673     | 92.548       | 96.3652 |           |

Supplementary Fig. 9. HPLC of 3g.

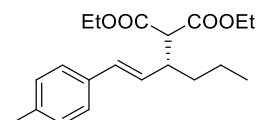

### Diethyl (*R,E*)-2-(1-(*p*-tolyl)hex-1-en-3-yl)malonate (3h)

Colorless oil, 76% yield,  $[\alpha]_D^{25} +41.5$  (*c* 1.9, CHCl<sub>3</sub>) for 96:4 er; <sup>1</sup>H NMR (500 MHz, chloroform-*d*)  $\delta$  7.23 (d, *J* = 7.9 Hz, 2H), 7.09 (d, *J* = 7.8 Hz, 2H), 6.40 (d, *J* = 15.8 Hz, 1H), 5.97 (dd, *J* = 15.7, 9.7 Hz, 1H), 4.23 – 4.17 (m, 2H), 4.14 – 4.06 (m, 2H), 3.40 (d, *J* = 9.0 Hz, 1H), 2.96 – 2.90 (m, 1H), 2.31 (s, 3H), 1.55 – 1.45 (m, 1H), 1.45 – 1.34 (m, 2H), 1.29 – 1.25 (m, 4H), 1.17 (t, *J* = 7.1 Hz, 3H), 0.89 (t, *J* = 7.2 Hz, 3H). <sup>13</sup>C NMR (126 MHz, chloroform-*d*)  $\delta$  168.5, 168.3, 137.1, 134.4, 132.3, 129.2, 128.8, 126.2, 61.4, 61.2, 57.4, 43.4, 35.1, 21.2, 20.4, 14.2, 13.9 (one alkyl carbon signal was not observed because of

overlapping). HRMS (EI):  $[M]^{\oplus}$  calcd for  $C_{20}H_{28}O_4^{\oplus}$  332.1982, found 332.1990. HPLC analysis: Chiracel AD-H column; detected at 254 nm, 40 °C; 2% *i*PrOH in *n*-Hexane; flow = 0.7 mL/min; Retention time: 11.6 min (major), 13.7 min (minor).

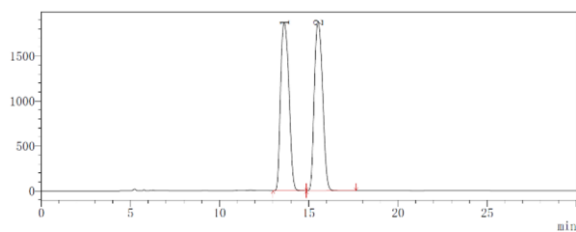

| Number | Ret. Time | Area     | Area% |
|--------|-----------|----------|-------|
| 1      | 13.621    | 60815591 | 49.96 |
| 2      | 15.520    | 60921090 | 50.04 |

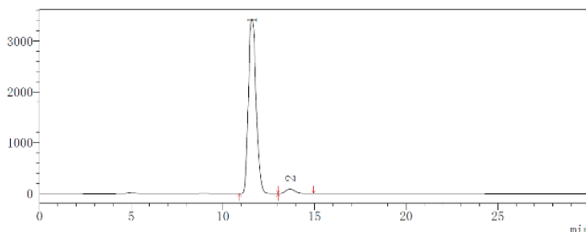

| Number | Ret. Time | Area      | Area% |
|--------|-----------|-----------|-------|
| 1      | 11.581    | 100333675 | 97.09 |
| 2      | 13.665    | 3002535   | 2.91  |

Supplementary Fig. 10. HPLC of 3h.

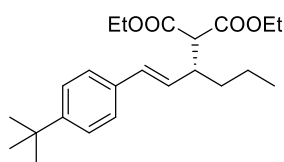

### Diethyl (*R,E*)-2-(1-(4-(*tert*-butyl)phenyl)hex-1-en-3-yl)malonate (**3i**)

Colorless oil, 79% yield,  $[\alpha]_D^{25} +37.0$  (*c* 2.6,  $CHCl_3$ ) for 97:3 er;  $^1H$  NMR (500 MHz, chloroform-*d*)  $\delta$  7.35 (d, *J* = 8.5 Hz, 2H), 7.31 (d, *J* = 8.3 Hz, 2H), 6.45 (d, *J* = 15.7 Hz, 1H), 6.02 (dd, *J* = 15.7, 9.7 Hz, 1H), 4.26 – 4.20 (m, 2H), 4.19 – 4.11 (m, 2H), 3.44 (d, *J* = 8.9 Hz, 1H), 3.00 – 2.94 (m, 1H), 1.57 – 1.48 (m, 1H), 1.48 – 1.41 (m, 2H), 1.34 (s, 9H), 1.33 – 1.27 (m, 4H), 1.22 (t, *J* = 7.1 Hz, 3H), 0.91 (t, *J* = 7.1 Hz, 3H).  $^{13}C$  NMR (126 MHz,  $CDCl_3$ )  $\delta$  168.5, 168.3, 150.4, 134.4, 132.2, 129.1, 126.0, 125.4, 61.4, 61.2, 57.4, 43.4, 35.1, 34.6, 31.3, 20.4, 14.21, 14.19, 13.9. HRMS (ESI):  $[M+Na]^{\oplus}$  calcd for  $C_{23}H_{34}O_4Na^{\oplus}$  397.2349, found 397.2347. HPLC analysis: Chiracel (AD-H)+(AD-H) column; detected at 254 nm, 20 °C; 1% *i*PrOH in *n*-Hexane; flow = 0.7 mL/min; Retention time: 22.8 min (major), 24.3 min (minor).

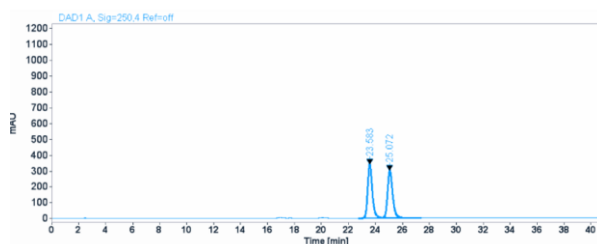

Signal: DAD1 A, Sig=250,4 Ref=off

| RT [min] | Width [min] | Area [mAU*s] | Height [mAU] | Area%   | ee value% |
|----------|-------------|--------------|--------------|---------|-----------|
| 23.583   | 0.360       | 8058.676     | 340.258      | 50.6061 | RAC       |
| 25.072   | 0.399       | 7865.625     | 300.618      | 49.3939 |           |

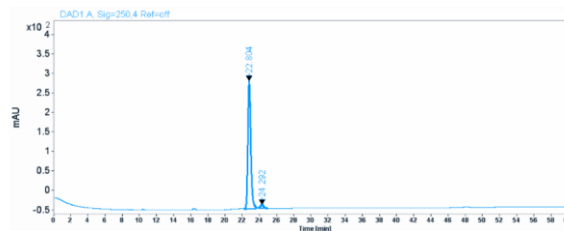

Signal: DAD1 A, Sig=250,4 Ref=off

| RT [min] | Width [min] | Area [mAU*s] | Height [mAU] | Area%   | ee value% |
|----------|-------------|--------------|--------------|---------|-----------|
| 22.804   | 0.391       | 7659.245     | 326.761      | 97.4356 | 94.871    |
| 24.292   | 0.353       | 201.581      | 8.738        | 2.5644  |           |

Supplementary Fig. 11. HPLC of 3i.

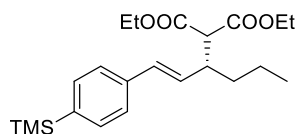

### Diethyl (*R,E*)-2-(1-(4-(trimethylsilyl)phenyl)hex-1-en-3-yl)malonate (**3j**)

Colorless oil, 82% yield,  $[\alpha]_D^{25} +28.0$  (*c* 3.1, CHCl<sub>3</sub>) for 96:4 er; <sup>1</sup>H NMR (500 MHz, chloroform-*d*)  $\delta$  7.48 – 7.42 (m, 2H), 7.32 (d, *J* = 8.0 Hz, 2H), 6.43 (d, *J* = 15.7 Hz, 1H), 6.06 (dd, *J* = 15.8, 9.7 Hz, 1H), 4.24 – 4.18 (m, 2H), 4.15 – 4.07 (m, 2H), 3.41 (d, *J* = 8.8 Hz, 1H), 2.98 – 2.92 (m, 1H), 1.56 – 1.46 (m, 1H), 1.46 – 1.34 (m, 2H), 1.27 (t, *J* = 7.1 Hz, 4H), 1.19 (t, *J* = 7.1 Hz, 3H), 0.89 (t, *J* = 7.2 Hz, 3H), 0.25 (s, 9H). <sup>13</sup>C NMR (126 MHz, CDCl<sub>3</sub>)  $\delta$  168.4, 168.3, 139.6, 137.6, 133.6, 132.5, 130.2, 125.6, 61.4, 61.2, 57.4, 43.4, 35.1, 20.4, 14.2, 14.2, 13.9, -1.1. HRMS (EI):  $[M]^+$  calcd for C<sub>22</sub>H<sub>34</sub>O<sub>4</sub>Si<sup>+</sup> 390.2221, found 390.2219. HPLC analysis: Chiralpak IE column; detected at 254 nm, 40 °C; 2% *i*PrOH in *n*-Hexane; flow = 0.7 mL/min; Retention time: 9.8 min (major), 11.5 min (minor).

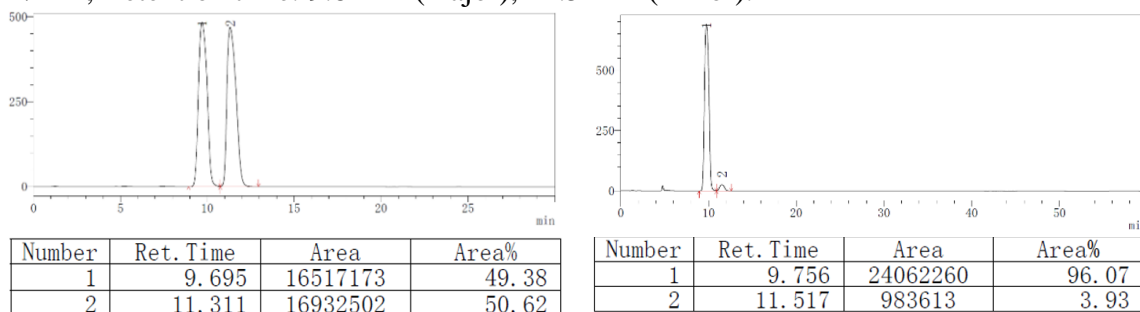

Supplementary Fig. 12. HPLC of **3j**.

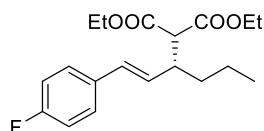

### Diethyl (*R,E*)-2-(1-(4-fluorophenyl)hex-1-en-3-yl)malonate (**3k**)

Colorless oil, 89% yield,  $[\alpha]_D^{25} +37.3$  (*c* 1.3, CHCl<sub>3</sub>) for 95:5 er; <sup>1</sup>H NMR (500 MHz, chloroform-*d*)  $\delta$  7.32 – 7.28 (m, 2H), 6.99 – 6.95 (m, 2H), 6.44 – 6.36 (m, 1H), 5.96 (dd, *J* = 15.9, 9.5 Hz, 1H), 4.24 – 4.18 (m, 2H), 4.16 – 4.07 (m, 2H), 3.41 (d, *J* = 8.6 Hz, 1H), 2.96 – 2.90 (m, 1H), 1.56 – 1.47 (m, 1H), 1.46 – 1.36 (m, 2H), 1.29 – 1.24 (m, 4H), 1.17 (t, *J* = 7.1 Hz, 3H), 0.90 (t, *J* = 7.1 Hz, 3H). <sup>13</sup>C NMR (126 MHz, CDCl<sub>3</sub>)  $\delta$  168.4, 168.3, 162.2 (d, *J* = 245.6 Hz), 133.3 (d, *J* = 4.1 Hz), 131.2, 129.6 (d, *J* = 2.7 Hz), 127.7 (d, *J* = 8.4 Hz), 115.4 (d, *J* = 21.5 Hz), 61.4, 61.2, 57.3, 43.4, 35.0, 20.4, 14.2, 13.9. <sup>19</sup>F NMR (376 MHz, Chloroform-*d*)  $\delta$  -115.03 (s). HRMS (ESI):  $[M+H]^+$  calcd for C<sub>19</sub>H<sub>26</sub>O<sub>4</sub>F<sup>+</sup> 337.1810, found 337.1808. HPLC analysis: Chiralcel AD-H column; detected at 254 nm, 40 °C; 5% *i*PrOH in *n*-Hexane; flow = 0.7 mL/min; Retention time: 9.4 min (major), 10.5 min (minor).

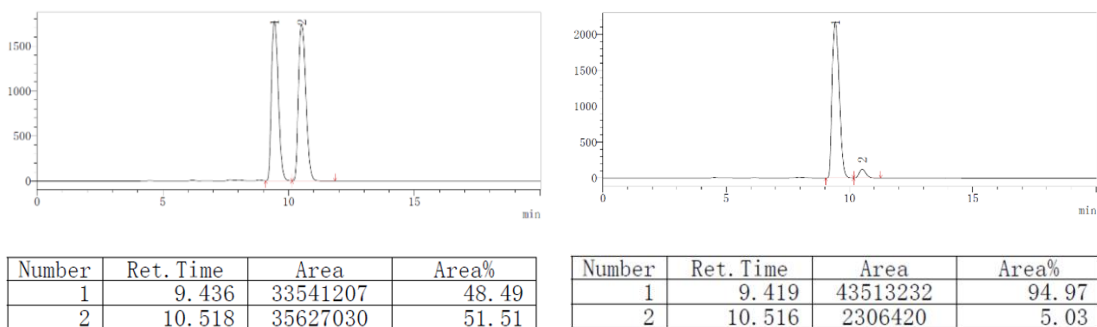

Supplementary Fig. 13. HPLC of 3k.

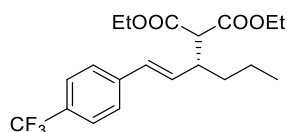

**Diethyl (*R,E*)-2-(1-(4-(trifluoromethyl)phenyl)hex-1-en-3-yl)malonate (3l)**

Colorless oil, 83% yield,  $[\alpha]_D^{25} +29.5$  ( $c$  2.4,  $\text{CHCl}_3$ ) for 93:7 er;  $^1\text{H}$  NMR (500 MHz, chloroform- $d$ )  $\delta$  7.54 (d,  $J = 8.0$  Hz, 2H), 7.43 (d,  $J = 8.0$  Hz, 2H), 6.47 (d,  $J = 15.8$  Hz, 1H), 6.18 (dd,  $J = 15.8, 9.6$  Hz, 1H), 4.24 – 4.18 (m, 2H), 4.16 – 4.09 (m, 2H), 3.44 (d,  $J = 8.6$  Hz, 1H), 3.01 – 2.94 (m, 1H), 1.59 – 1.38 (m, 3H), 1.29 – 1.25 (m, 4H), 1.18 (t,  $J = 7.1$  Hz, 3H), 0.90 (t,  $J = 7.2$  Hz, 3H).  $^{13}\text{C}$  NMR (126 MHz,  $\text{CDCl}_3$ )  $\delta$  168.31, 168.21, 140.61, 132.84, 131.15, 129.22 (q,  $J = 32.6$  Hz), 126.42, 125.52 (q,  $J = 4.1$  Hz), 124.3 (q,  $J = 270.9$  Hz), 61.50, 61.32, 57.08, 43.38, 34.94, 20.47, 14.19, 14.17, 13.88.  $^{19}\text{F}$  NMR (376 MHz, Chloroform- $d$ )  $\delta$  -62.55. HRMS (ESI):  $[\text{M}+\text{H}]^{\oplus}$  calcd for  $\text{C}_{20}\text{H}_{26}\text{O}_4\text{F}_3^{\oplus}$  387.1778, found 387.1776. HPLC analysis: Chiracel AD-H column; detected at 254 nm, 40 °C; 10%  $i$ PrOH in  $n$ -Hexane; flow = 0.7 mL/min; Retention time: 8.1 min (minor), 8.7 min (major).

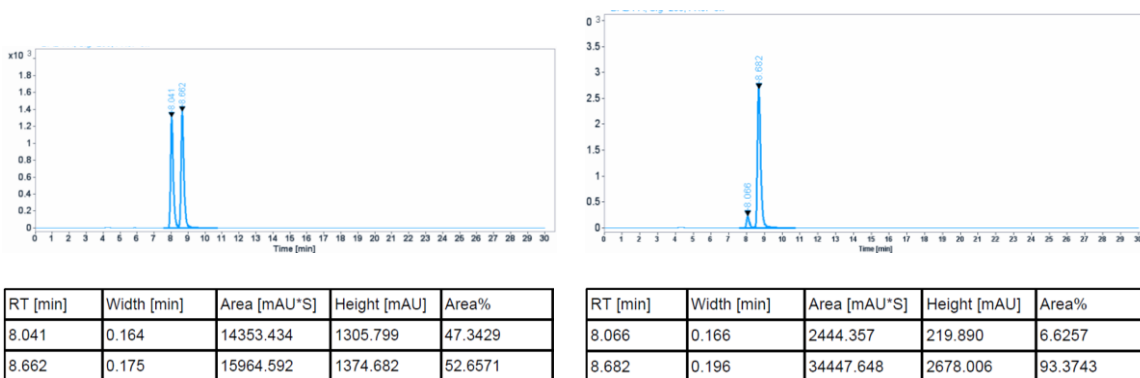

Supplementary Fig. 14. HPLC of 3l.

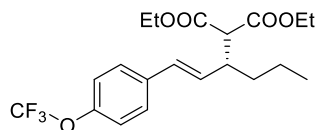

### Diethyl (*R,E*)-2-(1-(4-(trifluoromethoxy)phenyl)hex-1-en-3-yl)malonate (**3m**)

Colorless oil, 63% yield,  $[\alpha]_D^{25} +32.0$  (*c* 2.5, CHCl<sub>3</sub>) for 96:4 er; <sup>1</sup>H NMR (500 MHz, chloroform-*d*)  $\delta$  7.39 – 7.31 (m, 2H), 7.13 (d, *J* = 8.3 Hz, 2H), 6.42 (d, *J* = 15.7 Hz, 1H), 6.05 (dd, *J* = 15.7, 9.6 Hz, 1H), 4.24 – 4.18 (m, 2H), 4.17 – 4.09 (m, 2H), 3.42 (d, *J* = 8.6 Hz, 1H), 2.98 – 2.92 (m, 1H), 1.56 – 1.47 (m, 1H), 1.46 – 1.34 (m, 2H), 1.27 (t, *J* = 7.1 Hz, 4H), 1.18 (t, *J* = 7.1 Hz, 3H), 0.90 (t, *J* = 7.2 Hz, 3H). <sup>13</sup>C NMR (126 MHz, CDCl<sub>3</sub>)  $\delta$  168.4, 168.3, 148.4, 135.9, 131.1, 131.0, 127.4, 121.1, 61.5, 61.3, 57.2, 43.3, 35.0, 20.5, 14.2, 13.9 (one alkyl carbon signal was not observed because of overlapping. The carbon signal of CF<sub>3</sub> was also not observed). <sup>19</sup>F NMR (376 MHz, CDCl<sub>3</sub>)  $\delta$  -57.97. HRMS (EI): [M]<sup>+</sup> calcd for C<sub>20</sub>H<sub>25</sub>O<sub>5</sub>F<sub>3</sub><sup>+</sup> 402.1649, found 402.1651. HPLC analysis: Chiralpak IG column; detected at 254 nm, 40 °C; 5% *i*PrOH in *n*-Hexane; flow = 0.7 mL/min; Retention time: 8.4 min (major), 9.3 min (minor).

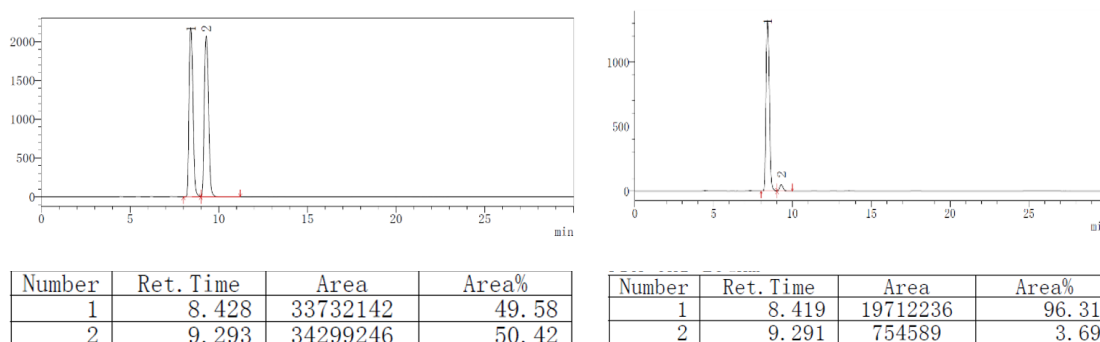

Supplementary Fig. 15. HPLC of **3m**.

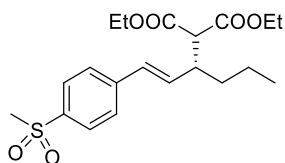

### Diethyl (*R,E*)-2-(1-(4-(methylsulfonyl)phenyl)hex-1-en-3-yl)malonate (**3n**)

Colorless oil, 48% yield,  $[\alpha]_D^{25} +33.9$  (*c* 1.2, CHCl<sub>3</sub>) for 97:3 er; <sup>1</sup>H NMR (400 MHz, chloroform-*d*)  $\delta$  7.90 – 7.82 (m, 2H), 7.55 – 7.47 (m, 2H), 6.50 (d, *J* = 15.8 Hz, 1H), 6.28 (dd, *J* = 15.8, 9.6 Hz, 1H), 4.21 (q, *J* = 7.2 Hz, 2H), 4.13 (qd, *J* = 7.1, 3.1 Hz, 2H), 3.45 (d, *J* = 8.4 Hz, 1H), 3.05 (s, 3H), 3.02 – 2.95 (m, 1H), 1.60 – 1.31 (m, 4H), 1.27 (t, *J* = 7.1 Hz, 3H), 1.19 (t, *J* = 7.1 Hz, 3H), 0.91 (t, *J* = 7.2 Hz, 3H). <sup>13</sup>C NMR (101 MHz, chloroform-*d*)  $\delta$  168.2, 168.1, 142.5, 138.8, 134.5, 130.7, 127.7, 126.9, 61.5, 61.3, 56.9, 44.6, 43.3, 34.8, 20.4, 14.2, 14.1, 13.8. HRMS (EI): [M]<sup>+</sup> calcd for C<sub>20</sub>H<sub>28</sub>O<sub>6</sub>S<sup>+</sup> 396.1601, found 396.1606. HPLC analysis: Chiralpak IA column; detected at 254 nm, 40 °C; 15% *i*PrOH in *n*-Hexane; flow = 0.7 mL/min; Retention time: 17.3 min (minor), 19.6 min (major).

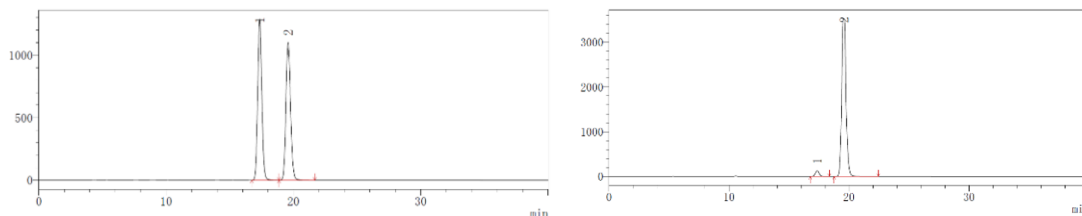

| Number | Ret. Time | Area     | Area% |
|--------|-----------|----------|-------|
| 1      | 17.352    | 29174655 | 51.16 |
| 2      | 19.581    | 27846616 | 48.84 |

| Number | Ret. Time | Area     | Area% |
|--------|-----------|----------|-------|
| 1      | 17.345    | 2920700  | 3.18  |
| 2      | 19.579    | 88979602 | 96.82 |

Supplementary Fig. 16. HPLC of 3n.

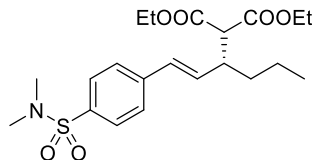

**Diethyl (*R,E*)-2-(1-(4-(*N,N*-dimethylsulfamoyl)phenyl)hex-1-en-3-yl)malonate (3o)**

Colorless oil, 51% yield,  $[\alpha]_D^{25} +26.1$  (*c* 2.2,  $\text{CHCl}_3$ ) for 97:3 er;  $^1\text{H NMR}$  (500 MHz, chloroform-*d*)  $\delta$  7.70 (d, *J* = 8.1 Hz, 2H), 7.49 (d, *J* = 8.1 Hz, 2H), 6.49 (d, *J* = 15.8 Hz, 1H), 6.25 (dd, *J* = 15.8, 9.6 Hz, 1H), 4.25 – 4.19 (m, 2H), 4.18 – 4.10 (m, 2H), 3.46 (d, *J* = 8.4 Hz, 1H), 3.02 – 2.96 (m, 1H), 2.71 (s, 6H), 1.59 – 1.37 (m, 3H), 1.28 (t, *J* = 7.1 Hz, 4H), 1.20 (t, *J* = 7.1 Hz, 3H), 0.92 (t, *J* = 7.2 Hz, 3H).  $^{13}\text{C NMR}$  (126 MHz,  $\text{CDCl}_3$ )  $\delta$  168.3, 168.2, 141.5, 133.9, 133.8, 130.8, 128.1, 126.6, 61.5, 61.3, 61.3, 57.0, 43.3, 38.0, 34.9, 20.5, 14.2, 13.9. HRMS (EI):  $[\text{M}]^{\oplus}$  calcd for  $\text{C}_{21}\text{H}_{31}\text{O}_6\text{NS}^{\oplus}$  425.1867, found 425.1870. HPLC analysis: Chiralpak IG column; detected at 254 nm, 40 °C; 5%  $i$ PrOH in *n*-Hexane; flow = 0.7 mL/min; Retention time: 21.5 min (minor), 25.4 min (major).

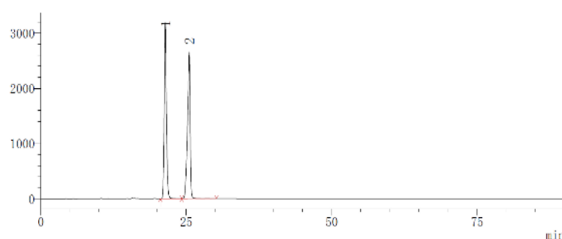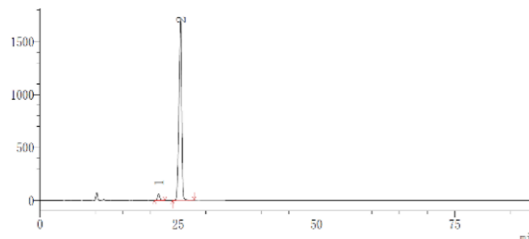

| Number | Ret. Time | Area     | Area% |
|--------|-----------|----------|-------|
| 1      | 21.383    | 81689009 | 49.61 |
| 2      | 25.503    | 82958198 | 50.39 |

| Number | Ret. Time | Area     | Area% |
|--------|-----------|----------|-------|
| 1      | 21.460    | 1718770  | 2.86  |
| 2      | 25.448    | 58361865 | 97.14 |

Supplementary Fig. 17. HPLC of 3o.

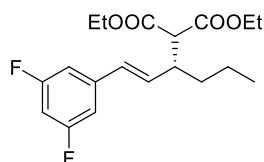

**Diethyl (*R,E*)-2-(1-(3,5-difluorophenyl)hex-1-en-3-yl)malonate (3p)**

Colorless oil, 73% yield,  $[\alpha]_D^{25} +34.9$  (*c* 0.78,  $\text{CHCl}_3$ ) for 96:4 er;  $^1\text{H NMR}$  (500 MHz, chloroform-*d*)  $\delta$  6.88 – 6.79 (m, 2H), 6.70 – 6.60 (m, 1H), 6.36 (d, *J* = 15.7 Hz, 1H), 6.10 (dd, *J* = 15.7, 9.7 Hz, 1H), 4.23 – 4.19 (m, 2H), 4.17 – 4.09 (m, 2H), 3.42 (d, *J* = 8.5 Hz, 1H), 2.98 – 2.91 (m, 1H), 1.57 – 1.47 (m, 1H), 1.47 – 1.35 (m, 2H), 1.29 – 1.24 (m, 4H), 1.19 (t, *J* = 7.1 Hz, 3H), 0.90 (t, *J* = 7.2 Hz, 3H).  $^{13}\text{C NMR}$  (126 MHz,  $\text{CDCl}_3$ )  $\delta$  168.3, 168.2, 163.2 (dd, 13.9, 248.2 Hz), 132.9, 130.5 (t, *J* = 3.0 Hz), 109.0 (d, *J* = 6.3 Hz), 108.8 (d, *J* = 6.0 Hz), 102.6 (t, *J* = 26.5 Hz), 61.5, 61.3, 57.0, 43.2, 34.9, 20.4, 14.2, 13.9 (one alkyl



carbon signal was not observed because of overlapping).  $^{19}\text{F}$  NMR (376 MHz, Chloroform-*d*)  $\delta$ , -110.55. HRMS (EI):  $[\text{M}]^{\oplus}$  calcd for  $\text{C}_{19}\text{H}_{24}\text{O}_4\text{F}_2^{\oplus}$  354.1637, found 354.1639. HPLC analysis: Chiracel AD-H column; detected at 254 nm, 40 °C; 5% *i*PrOH in *n*-Hexane; flow = 0.7 mL/min; Retention time: 7.7 min (major), 10.1 min (minor).

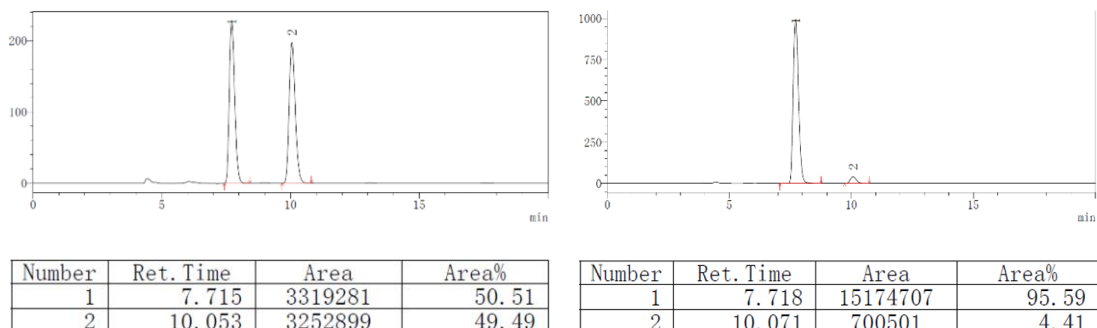

Supplementary Fig. 18. HPLC of 3p.

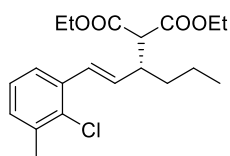

**Diethyl (*R,E*)-2-(1-(2-chloro-3-methylphenyl)hex-1-en-3-yl)malonate (3q)**

Colorless oil, 75% yield,  $[\alpha]_{\text{D}}^{25} +24.6$  (*c* 1.5,  $\text{CHCl}_3$ ) for 94:6 er;  $^1\text{H}$  NMR (400 MHz, chloroform-*d*)  $\delta$  7.32 (dd,  $J = 6.9, 2.6$  Hz, 1H), 7.14 – 7.05 (m, 2H), 6.86 (d,  $J = 15.7$  Hz, 1H), 6.00 (dd,  $J = 15.7, 9.6$  Hz, 1H), 4.25 – 4.11 (m, 4H), 3.44 (d,  $J = 8.6$  Hz, 1H), 3.05 – 2.97 (m, 1H), 2.36 (s, 3H), 1.60 – 1.49 (m, 1H), 1.48 – 1.37 (m, 2H), 1.33 – 1.25 (m, 4H), 1.21 (t,  $J = 7.1$  Hz, 3H), 0.91 (t,  $J = 7.1$  Hz, 3H).  $^{13}\text{C}$  NMR (101 MHz,  $\text{cdCl}_3$ )  $\delta$  168.4, 168.2, 136.6, 135.7, 133.0, 132.7, 129.7, 129.5, 126.2, 124.7, 61.4, 61.3, 57.3, 43.4, 34.9, 20.7, 20.4, 14.1, 14.1, 13.9. HRMS (EI):  $[\text{M}]^{\oplus}$  calcd for  $\text{C}_{20}\text{H}_{27}\text{O}_4\text{Cl}^{\oplus}$  366.1592, found 366.1596. HPLC analysis: Chiralpak ID column; detected at 254 nm, 40 °C; 5% *i*PrOH in *n*-Hexane; flow = 0.7 mL/min; Retention time: 16.7 min (minor), 18.8 min (major).

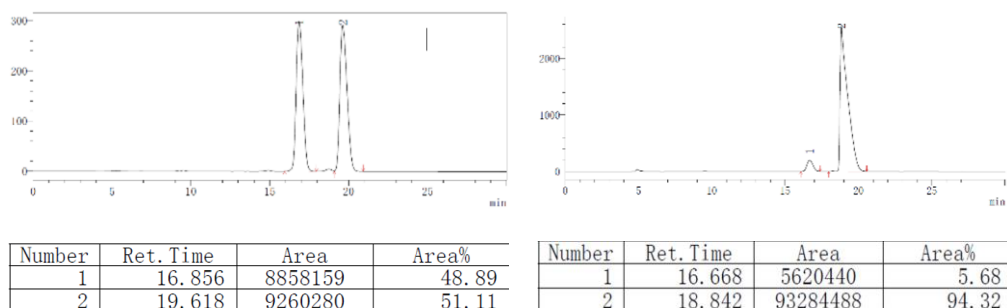

Supplementary Fig. 19. HPLC of 3q.

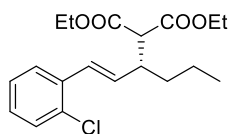

### Diethyl (*R,E*)-2-(1-(2-chlorophenyl)hex-1-en-3-yl)malonate (**3r**)

Colorless oil, 41% yield,  $[\alpha]_D^{25} +24.7$  (*c* 1.1,  $\text{CHCl}_3$ ) for 95:5 er;  $^1\text{H NMR}$  (500 MHz, Chloroform-*d*)  $\delta$  7.48 (dd,  $J = 7.7, 1.8$  Hz, 1H), 7.32 (dd,  $J = 7.8, 1.5$  Hz, 1H), 7.21 – 7.13 (m, 2H), 6.81 (d,  $J = 15.8$  Hz, 1H), 6.06 (dd,  $J = 15.8, 9.6$  Hz, 1H), 4.25 – 4.17 (m, 3H), 4.19 – 4.11 (m, 2H), 3.44 (d,  $J = 8.6$  Hz, 1H), 3.06 – 2.96 (m, 1H), 1.59 – 1.48 (m, 1H), 1.48 – 1.37 (m, 2H), 1.37 – 1.28 (m, 2H), 1.27 (t,  $J = 7.1$  Hz, 3H), 1.21 (t,  $J = 7.1$  Hz, 3H), 0.91 (t,  $J = 7.2$  Hz, 3H).  $^{13}\text{C NMR}$  (126 MHz,  $\text{CDCl}_3$ )  $\delta$  168.4, 168.2, 135.4, 132.9, 132.8, 129.6, 128.7, 128.4, 127.0, 126.8, 61.5, 61.4, 57.3, 43.4, 35.0, 20.4, 14.18, 14.16, 13.9. HRMS (ESI):  $[\text{M}+\text{Na}]^{\oplus}$  calcd for  $\text{C}_{19}\text{H}_{25}\text{O}_4\text{ClNa}^{\oplus}$  375.1334, found 375.1333. HPLC analysis: Chiracel AD-H column; detected at 254 nm, 40 °C; 5% *i*PrOH in *n*-Hexane; flow = 0.7 mL/min; Retention time: 7.1min (minor), 7.8 min (major).

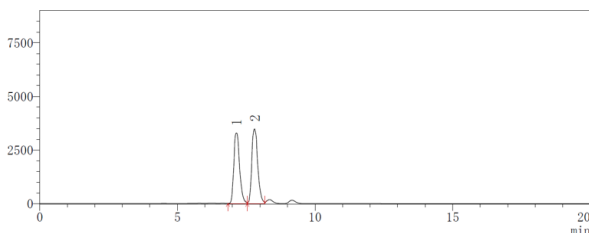

| Number | Ret. Time | Area     | Area% |
|--------|-----------|----------|-------|
| 1      | 7.145     | 48198465 | 47.90 |
| 2      | 7.805     | 52421412 | 52.10 |

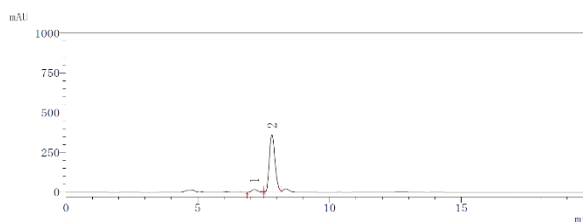

| PDA Ch1 254nm |           |         |       |
|---------------|-----------|---------|-------|
| Number        | Ret. Time | Area    | Area% |
| 1             | 7.147     | 260651  | 4.55  |
| 2             | 7.813     | 5464834 | 95.45 |

### Supplementary Fig. 20. HPLC of **3r**.

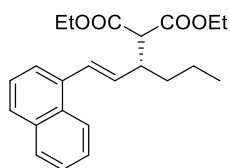

### Diethyl (*R,E*)-2-(1-(naphthalen-1-yl)hex-1-en-3-yl)malonate (**3s**)

Colorless oil, 58% yield,  $[\alpha]_D^{25} +19.8$  (*c* 2.3,  $\text{CHCl}_3$ ) for 91:9 er;  $^1\text{H NMR}$  (500 MHz, chloroform-*d*)  $\delta$  8.07 (dd,  $J = 8.2, 1.4$  Hz, 1H), 7.85 – 7.80 (m, 1H), 7.75 (d,  $J = 8.1$  Hz, 1H), 7.55 – 7.37 (m, 4H), 7.19 (d,  $J = 15.5$  Hz, 1H), 6.04 (dd,  $J = 15.5, 9.7$  Hz, 1H), 4.28 – 4.19 (m, 2H), 4.17 – 4.08 (m, 2H), 3.48 (d,  $J = 9.0$  Hz, 1H), 3.15 – 3.07 (m, 1H), 1.63 – 1.32 (m, 4H), 1.28 (t,  $J = 7.1$  Hz, 3H), 1.17 (t,  $J = 7.1$  Hz, 3H), 0.94 (t,  $J = 7.1$  Hz, 3H).  $^{13}\text{C NMR}$  (126 MHz,  $\text{CDCl}_3$ )  $\delta$  168.5, 168.4, 135.1, 133.6, 133.2, 131.2, 130.0, 128.5, 127.8, 126.0, 125.8, 125.7, 123.9, 123.9, 61.5, 61.3, 57.5, 43.7, 35.1, 20.6, 14.2, 14.2, 14.0. HRMS (EI):  $[\text{M}]^{\oplus}$  calcd for  $\text{C}_{23}\text{H}_{28}\text{O}_4$  368.1982, found 368.1977. HPLC analysis: Chiralpak IE column; detected at 254 nm, 40 °C; 1% *i*PrOH in *n*-Hexane; flow = 0.7 mL/min; Retention time: 18.1 min (major), 20.0 min (minor).

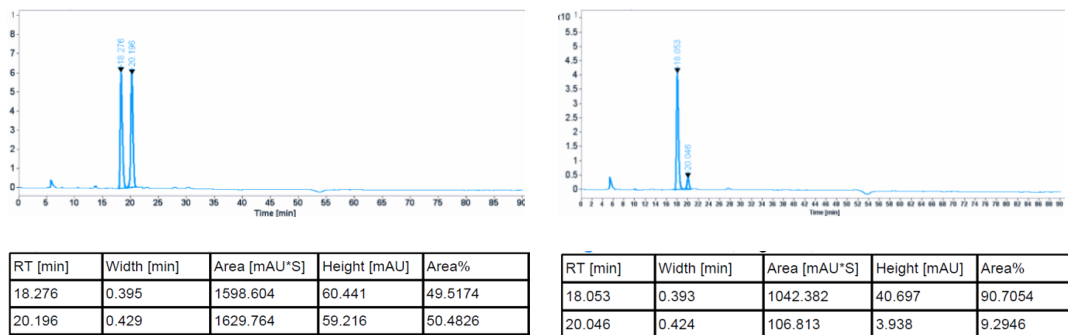

Supplementary Fig. 21. HPLC of 3s.

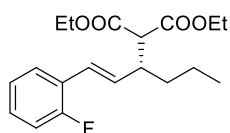

**Diethyl (*R,E*)-2-(1-(2-fluorophenyl)hex-1-en-3-yl)malonate (3t)**

Colorless oil, 68% yield,  $[\alpha]_D^{25} +32.7$  (*c* 1.9,  $\text{CHCl}_3$ ) for 96:4 er;  $^1\text{H}$  NMR (500 MHz, chloroform-*d*)  $\delta$  7.45 – 7.38 (m, 1H), 7.21 – 7.13 (m, 1H), 7.10 – 7.03 (m, 1H), 7.03 – 6.95 (m, 1H), 6.59 (d, *J* = 16.0 Hz, 1H), 6.14 (dd, *J* = 16.0, 9.7 Hz, 1H), 4.24 – 4.19 (m, 2H), 4.16 – 4.10 (m, 2H), 3.43 (d, *J* = 8.7 Hz, 1H), 3.00 – 2.94 (m, 1H), 1.58 – 1.48 (m, 1H), 1.48 – 1.36 (m, 2H), 1.32 – 1.25 (m, 4H), 1.20 (t, *J* = 7.1 Hz, 3H), 0.90 (t, *J* = 7.2 Hz, 3H).  $^{13}\text{C}$  NMR (126 MHz,  $\text{CDCl}_3$ )  $\delta$  168.4, 168.2, 160.1 (d, *J* = 248.8 Hz), 132.6 (d, *J* = 5.0 Hz), 128.6 (d, *J* = 8.5 Hz), 127.4 (d, *J* = 4.2 Hz), 124.9 (d, *J* = 12.3 Hz), 124.8 (d, *J* = 3.9 Hz), 124.1 (d, *J* = 3.8 Hz), 115.7 (d, *J* = 22.1 Hz), 61.4, 61.3, 57.3, 43.7, 35.0, 20.4, 14.2, 14.1, 13.9.  $^{19}\text{F}$  NMR (376 MHz,  $\text{CDCl}_3$ )  $\delta$  -118.52. HRMS (EI):  $[\text{M}]^{\oplus}$  calcd for  $\text{C}_{19}\text{H}_{25}\text{O}_4\text{F}^{\oplus}$  336.1731, found 336.1730. HPLC analysis: Chiralpak ID column; detected at 254 nm, 40 °C; 5% *i*PrOH in *n*-Hexane; flow = 0.7 mL/min; Retention time: 9.3 min (minor), 9.7 min (major).

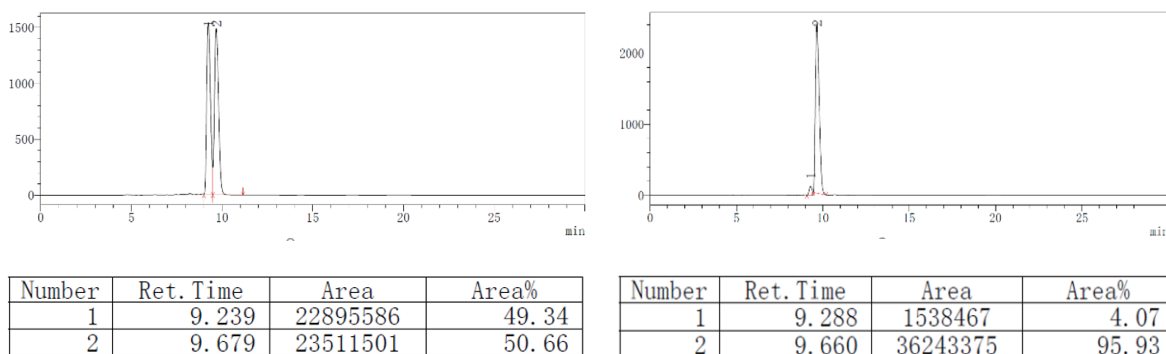

Supplementary Fig. 22. HPLC of 3t.

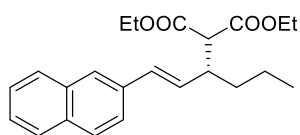

### Diethyl (*R,E*)-2-(1-(naphthalen-2-yl)hex-1-en-3-yl)malonate (**3u**)

Colorless oil, 72% yield,  $[\alpha]_D^{25} +36.4$  (*c* 0.62,  $\text{CHCl}_3$ ) for 95:5 er;  $^1\text{H NMR}$  (500 MHz, chloroform-*d*)  $\delta$  7.81 – 7.73 (m, 3H), 7.68 (s, 1H), 7.61 – 7.53 (m, 1H), 7.48 – 7.38 (m, 2H), 6.60 (d,  $J = 15.7$  Hz, 1H), 6.17 (dd,  $J = 15.8, 9.6$  Hz, 1H), 4.26 – 4.17 (m, 2H), 4.17 – 4.06 (m, 2H), 3.45 (d,  $J = 8.8$  Hz, 1H), 3.04 – 2.98 (m, 1H), 1.60 – 1.52 (m, 1H), 1.50 – 1.38 (m, 2H), 1.36 – 1.30 (m, 1H), 1.27 (t,  $J = 7.2$  Hz, 3H), 1.16 (t,  $J = 7.1$  Hz, 3H), 0.91 (t,  $J = 7.2$  Hz, 3H).  $^{13}\text{C NMR}$  (126 MHz,  $\text{CDCl}_3$ )  $\delta$  168.5, 168.4, 134.6, 133.7, 132.9, 132.6, 130.3, 128.2, 128.0, 127.7, 126.3, 126.0, 125.8, 123.7, 61.5, 61.3, 57.4, 43.6, 35.2, 20.5, 14.2, 13.9. HRMS (ESI):  $[\text{M}+\text{Na}]^{\oplus}$  calcd for  $\text{C}_{23}\text{H}_{28}\text{O}_4\text{Na}^{\oplus}$  391.1880, found 391.1879. HPLC analysis: Chiralpak IE column; detected at 254 nm, 40 °C; 1% *i*PrOH in *n*-Hexane; flow = 0.7 mL/min; Retention time: 25.7 min (major), 28.4 min (minor).

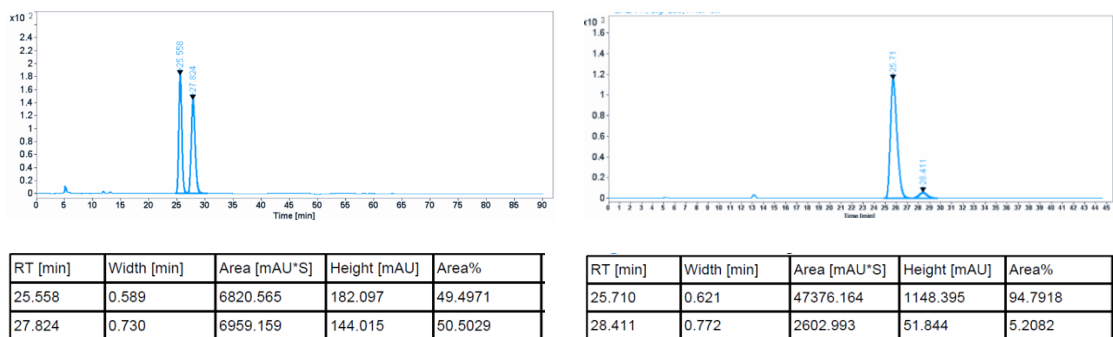

Supplementary Fig. 23. HPLC of **3u**.

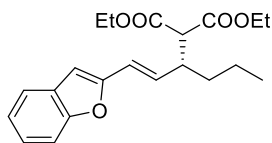

### Diethyl (*R,E*)-2-(1-(benzofuran-2-yl)hex-1-en-3-yl)malonate (**3v**)

Colorless oil, 93% yield,  $[\alpha]_D^{25} +37.1$  (*c* 2.7,  $\text{CHCl}_3$ ) for 96:4 er;  $^1\text{H NMR}$  (500 MHz, chloroform-*d*)  $\delta$  7.51 (dd,  $J = 7.7, 1.4$  Hz, 1H), 7.44 (d,  $J = 8.2$  Hz, 1H), 7.28 – 7.23 (m, 1H), 7.23 – 7.17 (m, 1H), 6.53 (s, 1H), 6.42 (d,  $J = 15.7$  Hz, 1H), 6.31 (dd,  $J = 15.7, 9.6$  Hz, 1H), 4.27 – 4.23 (m, 2H), 4.18 – 4.14 (m, 2H), 3.47 (d,  $J = 9.0$  Hz, 1H), 3.04 – 2.97 (m, 1H), 1.58 – 1.53 (m, 1H), 1.52 – 1.41 (m, 2H), 1.35 – 1.29 (m, 4H), 1.21 (t,  $J = 7.1$  Hz, 3H), 0.94 (t,  $J = 7.2$  Hz, 3H).  $^{13}\text{C NMR}$  (126 MHz,  $\text{CDCl}_3$ )  $\delta$  168.3, 168.2, 154.7, 154.3, 132.2, 129.0, 124.4, 122.8, 121.1, 120.8, 110.9, 104.0, 61.5, 61.4, 57.1, 43.3, 35.0, 20.4, 14.2, 14.1, 13.9. HRMS (ESI):  $[\text{M}+\text{Na}]^{\oplus}$  calcd for  $\text{C}_{21}\text{H}_{26}\text{O}_5\text{Na}^{\oplus}$  381.1672, found 381.1670. HPLC analysis: Chiralcel AD-H column; detected at 254 nm, 40 °C; 5% *i*PrOH in *n*-Hexane; flow = 0.7 mL/min; Retention time: 9.6 min (major), 12.4 min (minor).

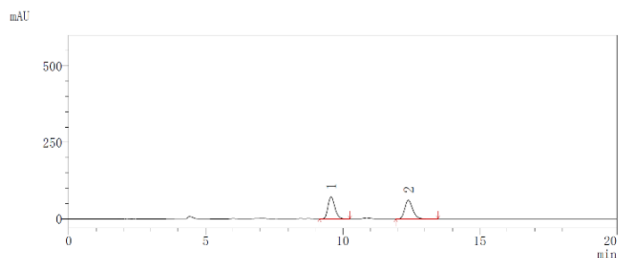

PDA Ch1 254nm

| Number | Ret. Time | Area    | Area% |
|--------|-----------|---------|-------|
| 1      | 9.578     | 1254988 | 50.70 |
| 2      | 12.395    | 1220576 | 49.30 |

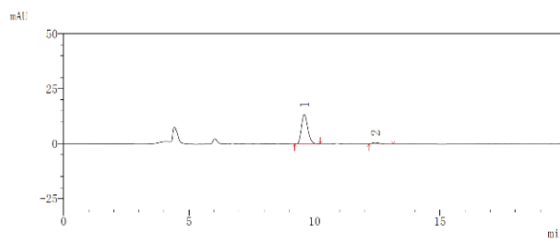

PDA Ch1 254nm

| Number | Ret. Time | Area   | Area% |
|--------|-----------|--------|-------|
| 1      | 9.595     | 236089 | 95.78 |
| 2      | 12.416    | 10402  | 4.22  |

Supplementary Fig. 24. HPLC of 3v.

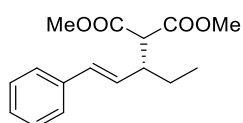

**Dimethyl (*R,E*)-2-(1-phenylpent-1-en-3-yl)malonate (3w)**

Colorless oil, 61% yield,  $[\alpha]_D^{25} +38.0$  (*c* 0.48, CHCl<sub>3</sub>) for 96:4 er; <sup>1</sup>H NMR (500 MHz, chloroform-*d*) δ 7.34 (d, *J* = 8.4 Hz, 2H), 7.29 (t, *J* = 7.8 Hz, 2H), 7.25 – 7.18 (m, 1H), 6.45 (d, *J* = 15.7 Hz, 1H), 6.01 (dd, *J* = 15.7, 9.6 Hz, 1H), 3.74 (s, 3H), 3.65 (s, 3H), 3.48 (d, *J* = 9.0 Hz, 1H), 2.89 – 2.82 (m, 1H), 1.65 – 1.56 (m, 1H), 1.47 – 1.35 (m, 1H), 0.92 (t, *J* = 7.3 Hz, 3H). <sup>13</sup>C NMR (126 MHz, CDCl<sub>3</sub>) δ 168.9, 168.7, 137.2, 132.8, 129.4, 128.6, 127.5, 126.4, 56.9, 52.5, 52.4, 45.3, 25.9, 11.9. HRMS (ESI): [M+Na]<sup>+</sup> calcd for C<sub>16</sub>H<sub>20</sub>O<sub>4</sub>Na<sup>+</sup> 299.1254, found 299.1255. HPLC analysis: Chiracel AD-H column; detected at 254 nm, 40 °C; 5% *i*PrOH in *n*-Hexane; flow = 0.7 mL/min; Retention time: 9.8 min (major), 11.3 min (minor).

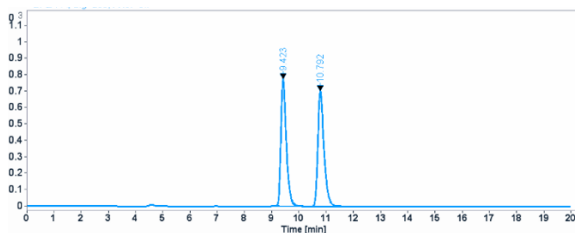

| RT [min] | Width [min] | Area [mAU*S] | Height [mAU] | Area%   |
|----------|-------------|--------------|--------------|---------|
| 9.423    | 0.207       | 10745.709    | 776.276      | 49.6722 |
| 10.792   | 0.233       | 10887.542    | 702.109      | 50.3278 |

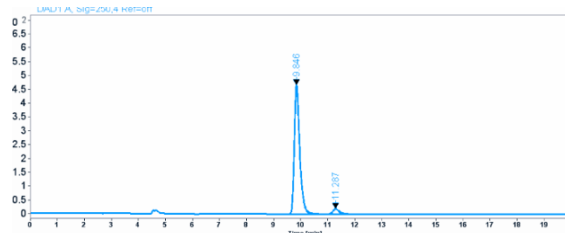

| RT [min] | Width [min] | Area [mAU*S] | Height [mAU] | Area%   |
|----------|-------------|--------------|--------------|---------|
| 9.846    | 0.208       | 6478.008     | 467.711      | 95.5120 |
| 11.287   | 0.231       | 304.397      | 19.624       | 4.4880  |

Supplementary Fig. 25. HPLC of 3w.

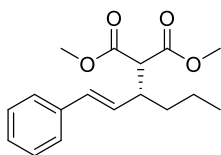

### Dimethyl (*R,E*)-2-(1-phenylhex-1-en-3-yl)malonate (**3x**)

Colorless oil, 74% yield,  $[\alpha]_D^{25} +41.2$  (*c* 1.4, CHCl<sub>3</sub>) for 95:5 er; <sup>1</sup>H NMR (400 MHz, chloroform-*d*)  $\delta$  7.37 – 7.31 (m, 2H), 7.32 – 7.23 (m, 2H), 7.25 – 7.17 (m, 1H), 6.44 (d, *J* = 15.8 Hz, 1H), 6.01 (dd, *J* = 15.8, 9.6 Hz, 1H), 3.74 (s, 3H), 3.64 (s, 3H), 3.46 (d, *J* = 8.8 Hz, 1H), 2.99 – 2.91 (m, 1H), 1.55 – 1.34 (m, 3H), 1.32 – 1.21 (m, 1H), 0.89 (t, *J* = 7.0 Hz, 3H). <sup>13</sup>C NMR (101 MHz, cdcl<sub>3</sub>)  $\delta$  168.8, 168.6, 137.1, 132.5, 129.7, 128.5, 127.4, 126.3, 57.1, 52.5, 52.3, 43.5, 35.0, 20.4, 13.9. HRMS (EI): [M]<sup>+</sup> calcd for C<sub>17</sub>H<sub>22</sub>O<sub>4</sub><sup>+</sup> 290.1506, found 290.1509. HPLC analysis: Chiracel AD-H column; detected at 254 nm, 40 °C; 1% *i*PrOH in *n*-Hexane; flow = 0.7 mL/min; Retention time: 12.1 min (major), 14.9 min (minor).

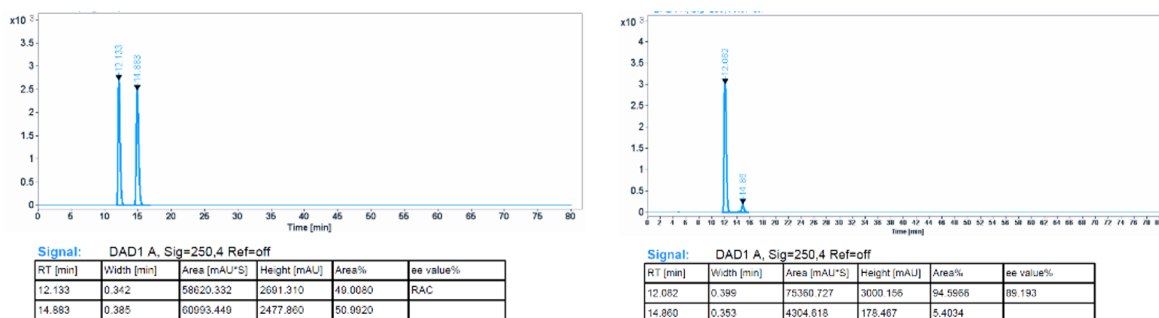

Supplementary Fig. 26. HPLC of **3x**.

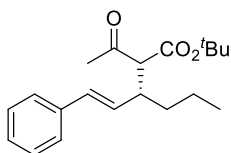

### *tert*-Butyl (2*S*)-2-acetyl-3-((*E*)-styryl)hexanoate (**3y**)

Colorless oil, 68% yield,  $[\alpha]_D^{25} +49.7$  (*c* 2.1, CHCl<sub>3</sub>) for 97:3 er, dr = 3:2; The data of spectra were given as a mixture of two diastereoisomers. <sup>1</sup>H NMR (400 MHz, Chloroform-*d*)  $\delta$  7.36 – 7.26 (m, 4H), 7.25 – 7.14 (m, 1H), 6.47 – 6.37 (m, 1H), 6.04 – 5.87 (m, 1H), 3.45 – 3.34 (m, 1H), 2.99 – 2.87 (m, 1H), 2.29 – 2.10 (m, 3H), 1.53 – 1.27 (m, 13H), 0.92 – 0.85 (m, 3H). <sup>13</sup>C NMR (101 MHz, chloroform-*d*)  $\delta$  202.9, 168.0, 167.8, 137.1, 137.0, 132.3, 132.3, 130.01, 129.97, 128.6, 128.5, 127.4, 127.3, 126.3, 126.2, 82.1, 81.9, 66.44, 66.37, 43.12, 43.08, 35.2, 35.1, 29.4, 29.3, 27.99, 27.95, 20.4, 20.2, 13.94, 13.91. HRMS (EI): [M]<sup>+</sup> calcd for C<sub>20</sub>H<sub>28</sub>O<sub>3</sub><sup>+</sup> 316.2033, found 316.2028. HPLC analysis: Chiracel AD-H column; detected at 254 nm, 40 °C; 1% *i*PrOH in *n*-Hexane; flow = 0.7 mL/min; Retention time: 8.4 min (major), 10.4 min (minor).

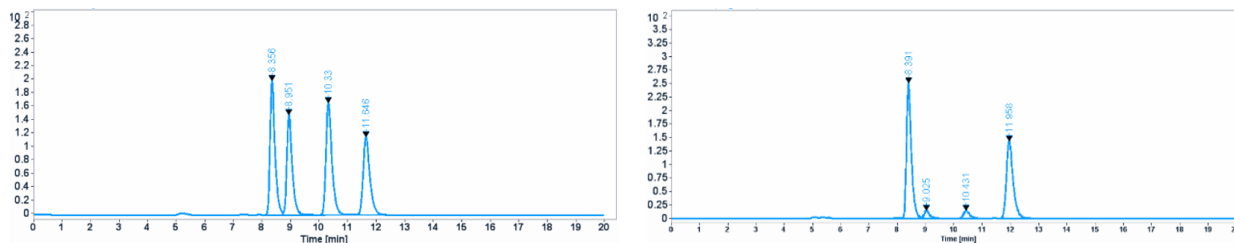

| RT [min] | Width [min] | Area [mAU*S] | Height [mAU] | Area%   |
|----------|-------------|--------------|--------------|---------|
| 8.356    | 0.178       | 2391.716     | 199.227      | 27.6124 |
| 8.951    | 0.195       | 1956.320     | 148.869      | 22.5858 |
| 10.330   | 0.220       | 2422.573     | 166.686      | 27.9687 |
| 11.646   | 0.245       | 1891.128     | 115.502      | 21.8331 |

| RT [min] | Width [min] | Area [mAU*S] | Height [mAU] | Area%   |
|----------|-------------|--------------|--------------|---------|
| 8.391    | 0.178       | 3015.917     | 250.813      | 52.1604 |
| 9.025    | 0.204       | 188.753      | 13.625       | 3.2645  |
| 10.431   | 0.223       | 217.655      | 14.545       | 3.7643  |
| 11.958   | 0.246       | 2359.683     | 143.019      | 40.8108 |

**Supplementary Fig. 27. HPLC of 3y.**

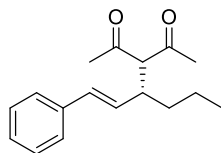

**(*R,E*)-3-(1-phenylhex-1-en-3-yl)pentane-2,4-dione (3z)**

Colorless oil, 45% yield,  $[\alpha]_D^{25} +72.0$  (*c* 0.68, CHCl<sub>3</sub>) for 84:16 er; <sup>1</sup>H NMR (400 MHz, chloroform-*d*) δ 7.35 – 7.27 (m, 4H), 7.24 – 7.16 (m, 1H), 6.43 (d, *J* = 15.8 Hz, 1H), 5.85 (dd, *J* = 15.8, 9.6 Hz, 1H), 3.76 (d, *J* = 10.5 Hz, 1H), 3.09 – 3.01 (m, 1H), 2.23 (s, 3H), 2.10 (s, 3H), 1.47 – 1.26 (m, 4H), 0.88 (t, *J* = 6.9 Hz, 3H). <sup>13</sup>C NMR (101 MHz, cdcl<sub>3</sub>) δ 203.7, 203.6, 136.8, 132.7, 129.4, 128.6, 127.6, 126.3, 74.9, 43.6, 35.3, 30.2, 29.8, 20.2, 13.9. HRMS (EI):  $[M]^+$  calcd for C<sub>17</sub>H<sub>22</sub>O<sub>2</sub><sup>+</sup> 258.1614, found 258.1613. HPLC analysis: Chiracel AD-H column; detected at 254 nm, 40 °C; 2% <sup>i</sup>PrOH in *n*-Hexane; flow = 0.7 mL/min; Retention time: 12.9 min (major), 13.7 min (minor).

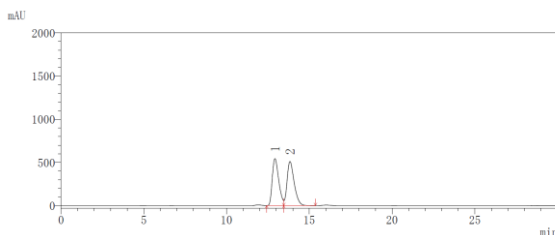

PDA Ch1 254nm

| Number | Ret. Time | Area     | Area% |
|--------|-----------|----------|-------|
| 1      | 12.927    | 14888425 | 49.16 |
| 2      | 13.834    | 15399510 | 50.84 |

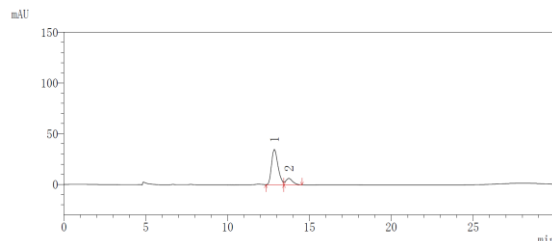

PDA Ch1 254nm

| Number | Ret. Time | Area   | Area% |
|--------|-----------|--------|-------|
| 1      | 12.853    | 971374 | 83.77 |
| 2      | 13.735    | 188151 | 16.23 |

**Supplementary Fig. 28. HPLC of 3z.**

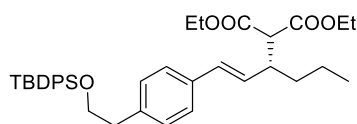

**Diethyl (*R,E*)-2-(1-(4-(2-((*tert*-butyldiphenylsilyl)oxy)ethyl)phenyl)hex-1-en-3-yl)malonate (4a)**

Colorless oil, 78% yield,  $[\alpha]_D^{25} +23.8$  (*c* 0.57, CHCl<sub>3</sub>) for 97:3 er; <sup>1</sup>H NMR (500 MHz, chloroform-*d*) δ 7.60 – 7.55 (m, 4H), 7.43 – 7.37 (m, 2H), 7.37 – 7.30 (m, 4H), 7.23 – 7.19 (m, 2H), 7.06 (d, *J* = 7.9 Hz, 2H), 6.40 (d, *J* = 15.8 Hz, 1H), 5.97 (dd, *J* = 15.7, 9.6 Hz, 1H), 4.24 – 4.16 (m, 2H), 4.14 – 4.05 (m, 2H), 3.81 (t, *J* = 6.9 Hz, 2H), 3.43 – 3.35 (m, 1H), 2.95 – 2.87 (m, 1H), 2.81 (t, *J* = 6.8 Hz, 2H), 1.48 (d, *J* = 11.6 Hz, 1H), 1.39 (d, *J* = 10.6 Hz, 2H), 1.29 – 1.23 (m, 4H), 1.19 – 1.11 (m, 3H), 1.02 (s, 9H), 0.89 (t, *J*

= 7.2 Hz, 3H).  $^{13}\text{C}$  NMR (126 MHz,  $\text{CDCl}_3$ )  $\delta$  168.5, 168.4, 138.5, 135.6, 135.1, 133.8, 132.3, 129.6, 129.4, 129.1, 127.7, 126.1, 65.2, 61.4, 61.3, 57.5, 43.5, 39.1, 35.2, 26.9, 20.4, 19.2, 14.22, 13.9 (one alkyl carbon signal was not observed because of overlapping). HRMS (ESI):  $[\text{M}+\text{Na}]^{\oplus}$  calcd for  $\text{C}_{37}\text{H}_{48}\text{O}_5\text{NaSi}^{\oplus}$  623.3163, found 623.3166. The er value was determined by the HPLC analysis of the desilyl derivative of **4a** as shown below.

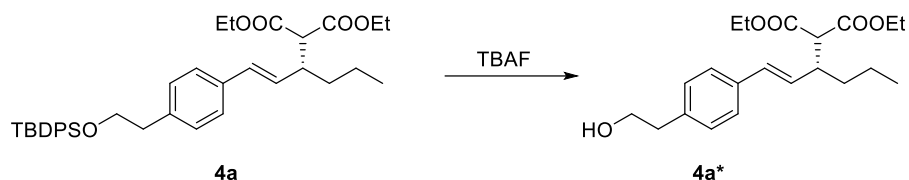

**Diethyl (*R,E*)-2-(1-(4-(2-hydroxyethyl)phenyl)hex-1-en-3-yl)malonate (**4a\***):** To a 25mL flask were added **4a** (43 mg, 0.070 mmol) and TBAF (1M in THF, 0.7 mL). The mixture was stirred at room temperature for 12 h and monitored by TLC. The reaction was quenched by water (3 mL), extracted by ethyl acetate (3 mL  $\times$  3), condensed and purified by flash column chromatography (hexane / ethyl acetate = 3/1) to give **4a\*** as a colorless oil in 67% yield.  $[\alpha]_{\text{D}}^{25} +35.1$  ( $c$  0.90,  $\text{CHCl}_3$ ) for 97:3 er;  $^1\text{H}$  NMR (500 MHz, chloroform- $d$ )  $\delta$  7.29 (d,  $J = 7.9$  Hz, 2H), 7.16 (d,  $J = 7.8$  Hz, 2H), 6.41 (d,  $J = 15.7$  Hz, 1H), 6.00 (dd,  $J = 15.7, 9.6$  Hz, 1H), 4.23 – 4.18 (m, 2H), 4.15 – 4.08 (m, 2H), 3.84 (t,  $J = 6.6$  Hz, 2H), 3.41 (d,  $J = 8.8$  Hz, 1H), 2.97 – 2.90 (m, 1H), 2.84 (t,  $J = 6.5$  Hz, 2H), 1.54 – 1.47 (m, 1H), 1.45 – 1.35 (m, 3H), 1.32 – 1.23 (m, 4H), 1.18 (t,  $J = 7.1$  Hz, 3H), 0.89 (t,  $J = 7.1$  Hz, 3H).  $^{13}\text{C}$  NMR (126 MHz,  $\text{CDCl}_3$ )  $\delta$  168.5, 168.3, 137.7, 135.6, 132.1, 129.5, 129.2, 126.5, 63.7, 61.4, 61.3, 57.4, 43.4, 38.9, 35.1, 20.4, 14.2, 14.2, 13.9. HRMS (ESI):  $[\text{M}+\text{Na}]^{\oplus}$  calcd for  $\text{C}_{21}\text{H}_{30}\text{O}_5\text{Na}^{\oplus}$  385.1985, found 385.1987. HPLC analysis: Chiralcel AD-H column; detected at 254 nm, 40  $^{\circ}\text{C}$ ; 10 %  $i$ PrOH in  $n$ -Hexane; flow = 0.7 mL/min; Retention time: 20.9 min (minor), 22.6 min (major).

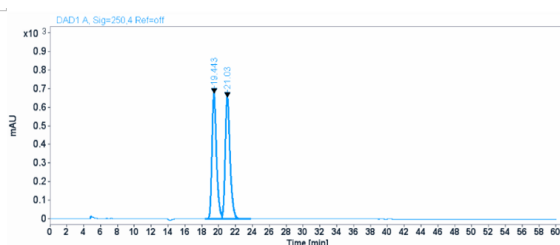

Signal: DAD1 A, Sig=250.4 Ref=off

| RT [min] | Width [min] | Area [mAU*s] | Height [mAU] | Area%   | ee value% |
|----------|-------------|--------------|--------------|---------|-----------|
| 19.443   | 0.564       | 24971.553    | 671.975      | 49.0951 | RAC       |
| 21.030   | 0.597       | 25892.043    | 652.505      | 50.9049 |           |

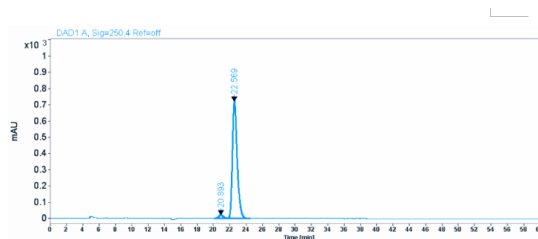

Signal: DAD1 A, Sig=250.4 Ref=off

| RT [min] | Width [min] | Area [mAU*s] | Height [mAU] | Area%   | ee value% |
|----------|-------------|--------------|--------------|---------|-----------|
| 20.893   | 0.579       | 801.211      | 20.909       | 2.6853  | 94.629    |
| 22.569   | 0.606       | 29035.691    | 718.347      | 97.3147 |           |

Supplementary Fig. 29. HPLC of **4a\***.

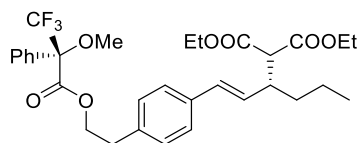



**Diethyl 2-((*R,E*)-1-(4-(2-(((*S*)-3,3,3-trifluoro-2-methoxy-2-phenylpropanoyl)oxy)ethyl)phenyl)hex-1-en-3-yl)malonate (4b)**

Colorless oil, 81% yield,  $[\alpha]_D^{25} +21.5$  (*c* 3.3, CHCl<sub>3</sub>) for 97:3 dr; <sup>1</sup>H NMR (500 MHz, chloroform-*d*) δ 7.41 – 7.35 (m, 3H), 7.35 – 7.28 (m, 2H), 7.24 (d, *J* = 7.8 Hz, 2H), 7.09 (d, *J* = 7.8 Hz, 2H), 6.41 (d, *J* = 15.7 Hz, 1H), 6.02 (dd, *J* = 15.7, 9.7 Hz, 1H), 4.56 – 4.47 (m, 2H), 4.24 – 4.18 (m, 2H), 4.15 – 4.05 (m, 2H), 3.47 (s, 3H), 3.42 (d, *J* = 8.8 Hz, 1H), 3.04 – 2.91 (m, 3H), 1.53 – 1.49 (m, 1H), 1.46 – 1.35 (m, 2H), 1.29 – 1.22 (m, 4H), 1.16 (t, *J* = 7.1 Hz, 3H), 0.90 (t, *J* = 7.1 Hz, 3H). <sup>13</sup>C NMR (126 MHz, CDCl<sub>3</sub>) δ 168.4, 168.3, 166.6, 136.2, 135.8, 132.0, 129.7, 129.6, 129.1, 128.4, 127.3 (q, *J* = 1.7 Hz), 126.5, 66.8, 61.4, 61.2, 57.3, 55.4 (q, *J* = 1.9 Hz), 43.4, 35.01, 34.4, 20.4, 14.2, 14.2, 13.9 (the carbon signal of CF<sub>3</sub> was not observed; one more alkyl carbon signal was also not observed because of overlapping). <sup>19</sup>F NMR (376 MHz, chloroform-*d*) δ -91.68. HRMS (ESI): [M+Na]<sup>+</sup> calcd for C<sub>31</sub>H<sub>37</sub>O<sub>7</sub>F<sub>3</sub>Na<sup>+</sup> 601.2384, found 601.2391. HPLC analysis: Chiracel AD-H column; detected at 254 nm, 30 °C; 5% <sup>i</sup>PrOH in *n*-Hexane; flow = 0.7 mL/min; Retention time: 24.6 min (major), 26.3 min (minor).

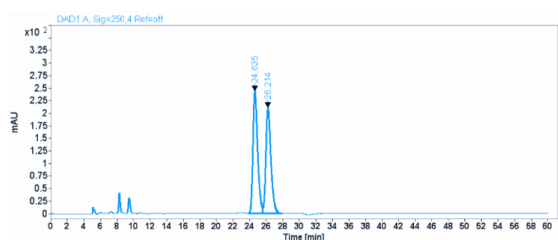

Signal: DAD1 A, Sig=250,4 Ref=off

| RT [min] | Width [min] | Area [mAU*S] | Height [mAU] | Area%   | ee value% |
|----------|-------------|--------------|--------------|---------|-----------|
| 24.635   | 0.584       | 9459.979     | 243.295      | 51.6061 | RAC       |
| 26.214   | 0.631       | 8871.154     | 210.138      | 48.3939 |           |

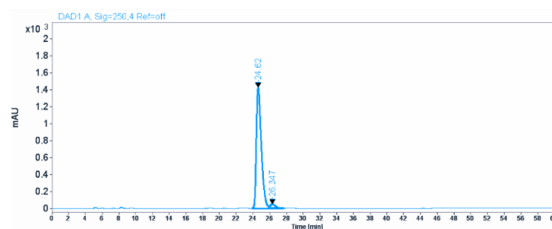

Signal: DAD1 A, Sig=250,4 Ref=off

| RT [min] | Width [min] | Area [mAU*S] | Height [mAU] | Area%   | ee value% |
|----------|-------------|--------------|--------------|---------|-----------|
| 24.620   | 0.622       | 58689.242    | 1427.052     | 96.7699 | 93.540    |
| 26.347   | 0.486       | 1959.005     | 47.770       | 3.2301  |           |

**Supplementary Fig. 30. HPLC of 4b.**

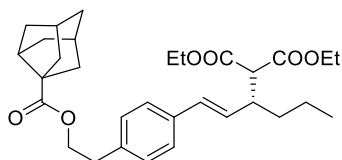

**Diethyl 2-((*R,E*)-1-(4-(2-(octahydro-2,5-methanopentalene-2-carbonyl)oxy)ethyl)phenyl)hex-1-en-3-yl)malonate (4c)**

Colorless oil, 58% yield,  $[\alpha]_D^{25} +25.2$  (*c* 1.2, CHCl<sub>3</sub>) for 98:2 er; <sup>1</sup>H NMR (500 MHz, chloroform-*d*) δ 7.29 – 7.26 (m, 2H), 7.15 (d, *J* = 7.8 Hz, 2H), 6.41 (d, *J* = 15.8 Hz, 1H), 6.00 (dd, *J* = 15.7, 9.6 Hz, 1H), 4.27 (t, *J* = 6.8 Hz, 2H), 4.20 (q, *J* = 7.1 Hz, 2H), 4.13 – 4.08 (m, 2H), 3.40 (d, *J* = 8.8 Hz, 1H), 2.98 – 2.84 (m, 3H), 2.58 (t, *J* = 6.8 Hz, 1H), 2.27 (s, 2H), 2.01 (d, *J* = 11.0 Hz, 2H), 1.81 – 1.72 (m, 4H), 1.63 – 1.55 (m, 4H), 1.53 – 1.46 (m, 1H), 1.43 – 1.36 (m, 2H), 1.29 – 1.23 (m, 4H), 1.17 (t, *J* = 7.1 Hz, 3H), 0.89 (t, *J* = 7.1 Hz, 3H). <sup>13</sup>C NMR (126 MHz, CDCl<sub>3</sub>) δ 177.6, 168.5, 168.3, 137.4, 135.5, 132.1, 129.5, 129.2, 126.3, 64.8, 61.4, 61.2, 57.4, 53.8, 46.9, 44.1, 44.1, 43.7, 43.45, 37.5, 35.1, 35.0, 34.8, 20.4, 14.2, 13.9. HRMS (EI): [M]<sup>+</sup> calcd for C<sub>31</sub>H<sub>42</sub>O<sub>6</sub><sup>+</sup> 510.2976, found 510.2982. HPLC analysis: Chiracel AD-H column; detected at 254 nm, 40 °C; 5% <sup>i</sup>PrOH in *n*-Hexane; flow = 0.7 mL/min; Retention time: 19.9 min (major), 21.3 min (minor).

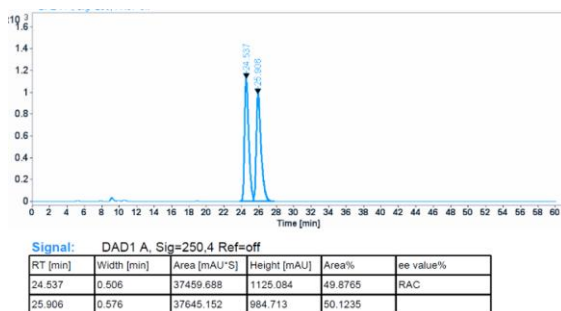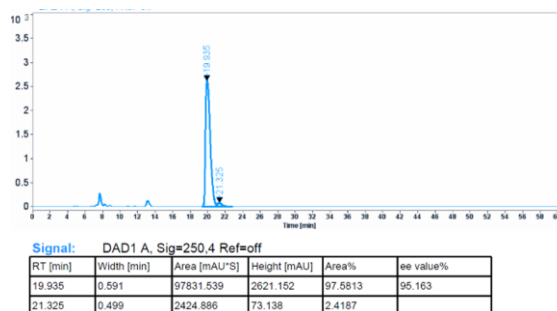

Supplementary Fig. 31. HPLC of 4c.

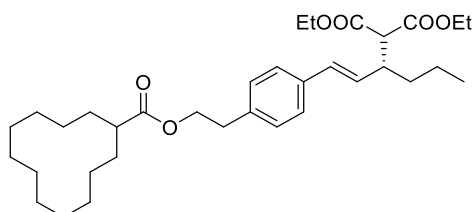

**Diethyl (*R,E*)-2-(1-(4-(2-((cyclododecanecarbonyl)oxy)ethyl)phenyl)hex-1-en-3-yl)malonate (4d)**

Colorless oil, 54% yield,  $[\alpha]_D^{25} +32.2$  (*c* 1.8,  $\text{CHCl}_3$ ) for 98:2 er;  $^1\text{H NMR}$  (500 MHz, chloroform-*d*)  $\delta$  7.26 (d, *J* = 5.8 Hz, 2H), 7.14 (d, *J* = 7.8 Hz, 2H), 6.41 (d, *J* = 15.8 Hz, 1H), 6.00 (dd, *J* = 15.8, 9.6 Hz, 1H), 4.29 – 4.16 (m, 4H), 4.16 – 4.06 (m, 2H), 3.40 (d, *J* = 8.9 Hz, 1H), 2.97 – 2.87 (m, 3H), 2.48 – 2.43 (m, 1H), 1.60 – 1.48 (m, 5H), 1.41 – 1.25 (m, 24H), 1.17 (t, *J* = 7.1 Hz, 3H), 0.89 (t, *J* = 7.1 Hz, 3H).  $^{13}\text{C NMR}$  (126 MHz,  $\text{CDCl}_3$ )  $\delta$  176.7, 168.4, 168.3, 137.2, 135.5, 132.1, 129.5, 129.1, 126.3, 64.6, 61.4, 61.2, 57.4, 43.4, 40.4, 35.1, 35.0, 34.9, 26.6, 23.8, 23.6, 23.5, 22.3, 20.4, 14.2, 13.9 (one alkyl carbon signal was not observed because of overlapping). HRMS (ESI):  $[\text{M}+\text{Na}]^+$  calcd for  $\text{C}_{34}\text{H}_{52}\text{O}_6\text{Na}$  579.3656, found 579.3659. HPLC analysis: Chiralpak AY3 column; detected at 214 nm, 40 °C; 5% *i*PrOH in *n*-Hexane; flow = 0.7 mL/min; Retention time: 13.1 min (major), 25.2 min (minor).

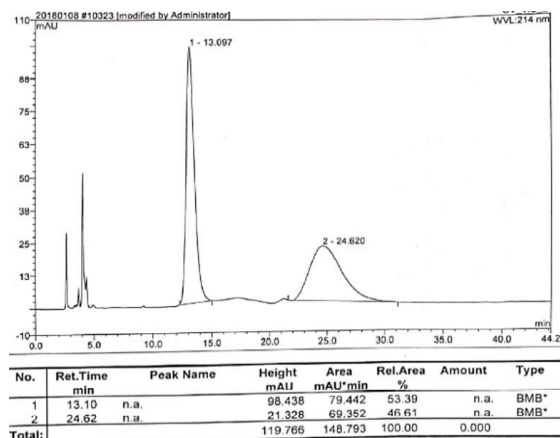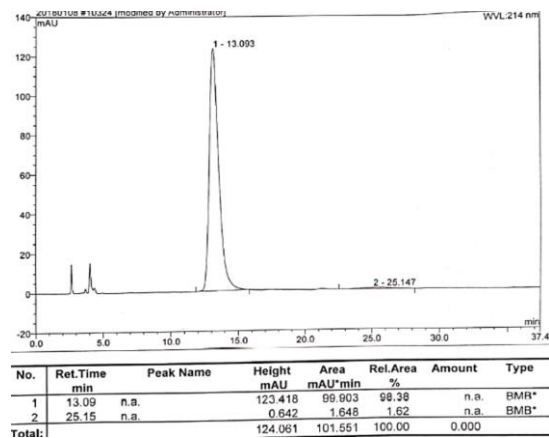

Supplementary Fig. 32. HPLC of 4d.

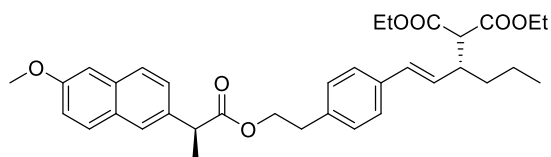

**Diethyl 2-((*R,E*)-1-(4-(2-(((*S*)-2-(6-methoxynaphthalen-2-yl)propanoyl)oxy)ethyl)phenyl)hex-1-en-3-yl)malonate (4e)**

Colorless oil, 88% yield,  $[\alpha]_D^{25} +30.0$  ( $c$  1.8,  $\text{CHCl}_3$ ) for 97:3 dr;  $^1\text{H NMR}$  (500 MHz, chloroform- $d$ )  $\delta$  7.71 – 7.65 (m, 2H), 7.65 – 7.61 (m, 1H), 7.35 (dd,  $J = 8.5, 1.9$  Hz, 1H), 7.18 – 7.11 (m, 2H), 7.11 – 7.07 (m, 2H), 6.97 – 6.92 (m, 2H), 6.36 (d,  $J = 15.7$  Hz, 1H), 5.94 (dd,  $J = 15.7, 9.6$  Hz, 1H), 4.33 – 4.18 (m, 4H), 4.17 – 4.03 (m, 2H), 3.93 (s, 3H), 3.82 (q,  $J = 7.1$  Hz, 1H), 3.40 (d,  $J = 8.9$  Hz, 1H), 2.98 – 2.88 (m, 1H), 2.84 – 2.78 (m, 2H), 1.55 (d,  $J = 7.1$  Hz, 3H), 1.52 – 1.34 (m, 3H), 1.28 – 1.25 (m, 4H), 1.16 (t,  $J = 7.1$  Hz, 3H), 0.90 (t,  $J = 7.2$  Hz, 3H).  $^{13}\text{C NMR}$  (126 MHz,  $\text{CDCl}_3$ )  $\delta$  174.6, 168.5, 168.3, 157.7, 137.0, 135.7, 135.4, 133.8, 132.1, 129.4, 129.4, 129.1, 129.0, 127.20, 126.3, 126.3, 126.1, 119.1, 105.6, 65.2, 61.4, 61.2, 57.4, 55.4, 45.5, 43.4, 35.1, 34.8, 20.4, 18.4, 14.2, 13.9 (one alkyl carbon signal was not observed because of overlapping). HRMS (ESI):  $[\text{M}]^{\oplus}$  calcd for  $\text{C}_{35}\text{H}_{43}\text{O}_7$  575.3003, found 575.3001. HRMS (ESI):  $[\text{M}+\text{H}]^{\oplus}$  calcd for  $\text{C}_{35}\text{H}_{43}\text{O}_7$  575.3003, found 575.3001. HPLC analysis: Chiracel AD-H column; detected at 214 nm, 40 °C; 10%  $i$ PrOH in  $n$ -Hexane; flow = 0.7 mL/min; Retention time: 25.9 min (major), 28.0 min (minor).

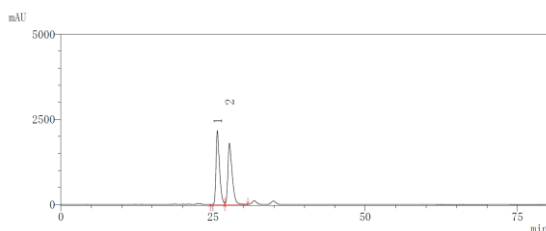

| PDA Ch1 254nm |           |          |       |
|---------------|-----------|----------|-------|
| Number        | Ret. Time | Area     | Area% |
| 1             | 25.701    | 85969048 | 49.48 |
| 2             | 27.686    | 87773256 | 50.52 |

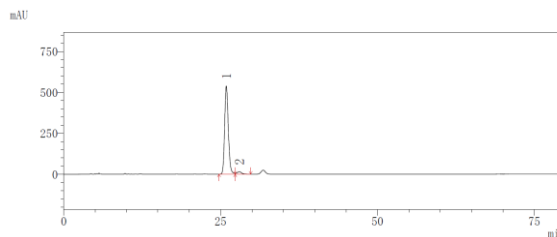

| PDA Ch1 254nm |           |          |       |
|---------------|-----------|----------|-------|
| Number        | Ret. Time | Area     | Area% |
| 1             | 25.909    | 21889800 | 96.54 |
| 2             | 27.990    | 783757   | 3.46  |

**Supplementary Fig. 33. HPLC of 4e.**

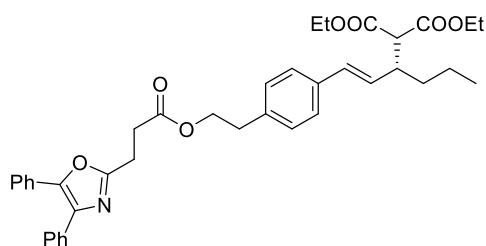

**Diethyl (*R,E*)-2-(1-(4-(2-((3-(4,5-diphenyloxazol-2-yl)propanoyl)oxy)ethyl)phenyl)hex-1-en-3-yl)malonate (4f)**

Colorless oil, 90% yield,  $[\alpha]_D^{25} +18.7$  ( $c$  4.2,  $\text{CHCl}_3$ ) for 97:3 er;  $^1\text{H NMR}$  (500 MHz, chloroform- $d$ )  $\delta$  7.66 – 7.60 (m, 2H), 7.59 – 7.52 (m, 2H), 7.39 – 7.28 (m, 6H), 7.28 – 7.23 (m, 2H), 7.16 – 7.08 (m, 2H),

6.40 (d,  $J = 15.7$  Hz, 1H), 5.99 (dd,  $J = 15.7, 9.6$  Hz, 1H), 4.32 (t,  $J = 7.0$  Hz, 2H), 4.20 (q,  $J = 7.1$  Hz, 2H), 4.14 – 4.07 (m, 2H), 3.40 (d,  $J = 8.8$  Hz, 1H), 3.16 (dd,  $J = 8.3, 6.8$  Hz, 2H), 2.99 – 2.86 (m, 5H), 1.56 – 1.46 (m, 1H), 1.46 – 1.33 (m, 2H), 1.33 – 1.20 (m, 4H), 1.17 (t,  $J = 7.1$  Hz, 3H), 0.89 (t,  $J = 7.1$  Hz, 3H).  $^{13}\text{C}$  NMR (126 MHz,  $\text{CDCl}_3$ )  $\delta$  171.9, 168.4, 168.3, 161.7, 145.4, 136.9, 135.5, 135.1, 132.5, 132.0, 129.5, 129.0, 129.0, 128.6, 128.6, 128.5, 128.1, 127.9, 126.5, 126.4, 65.2, 61.3, 61.2, 57.3, 43.4, 35.0, 34.7, 31.1, 23.5, 20.4, 14.2, 13.9 (one alkyl carbon signal was not observed because of overlapping). HRMS (EI):  $[\text{M}+\text{H}]^{\oplus}$  calcd for  $\text{C}_{39}\text{H}_{44}\text{O}_7\text{N}^{\oplus}$  638.3112, found 638.3111. HPLC analysis: Chiralpak AY3 column; detected at 254 nm, 40 °C; 15%  $i$ PrOH in  $n$ -Hexane; flow = 0.7 mL/min; Retention time: 12.5 min (major), 13.2 min (minor).

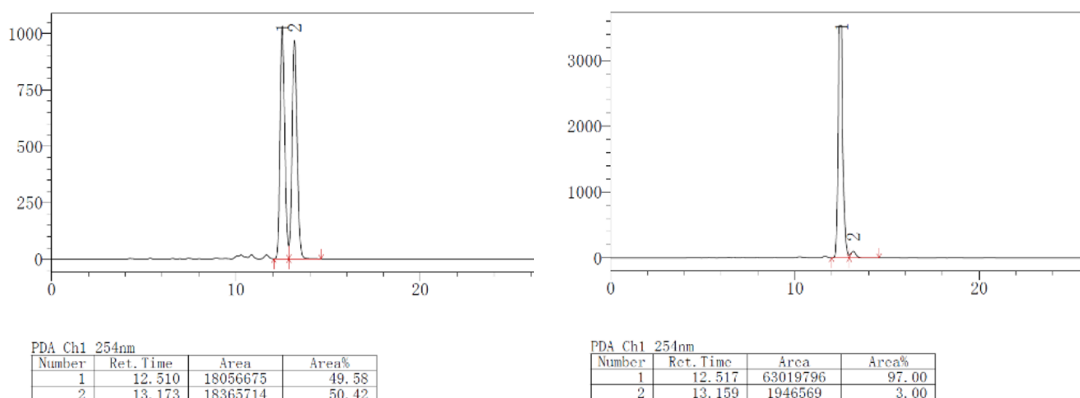

Supplementary Fig. 34. HPLC of 4f.

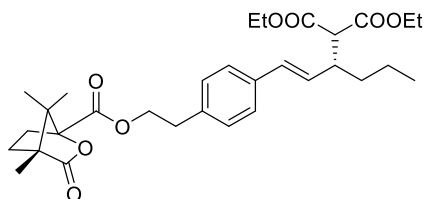

**Diethyl 2-((*R,E*)-1-(4-(2-(((1*R*,4*S*)-4,7,7-trimethyl-3-oxo-2-oxabicyclo[2.2.1]heptane-1-carbonyloxy)ethyl)phenyl)hex-1-en-3-yl)malonate (4g)**

Colorless oil, 54% yield,  $[\alpha]_{\text{D}}^{25} +24.5$  ( $c$  2.1,  $\text{CHCl}_3$ ) for 98:2 dr;  $^1\text{H}$  NMR (500 MHz, chloroform- $d$ )  $\delta$  7.27 (d,  $J = 7.3$  Hz, 2H), 7.15 (d,  $J = 7.8$  Hz, 2H), 6.40 (d,  $J = 15.8$  Hz, 1H), 6.01 (dd,  $J = 15.7, 9.6$  Hz, 1H), 4.43 (t,  $J = 7.0$  Hz, 2H), 4.20 (q,  $J = 7.1$  Hz, 2H), 4.16 – 4.06 (m, 2H), 3.41 (d,  $J = 8.8$  Hz, 1H), 3.01 – 2.88 (m, 3H), 2.41 – 2.32 (m, 1H), 2.03 – 1.94 (m, 1H), 1.94 – 1.85 (m, 1H), 1.71 – 1.63 (m, 1H), 1.56 – 1.46 (m, 1H), 1.45 – 1.34 (m, 2H), 1.31 – 1.23 (m, 4H), 1.17 (t,  $J = 7.1$  Hz, 3H), 1.10 (s, 3H), 0.97 (s, 3H), 0.92 – 0.82 (m, 6H).  $^{13}\text{C}$  NMR (126 MHz,  $\text{CDCl}_3$ )  $\delta$  178.1, 168.4, 168.3, 167.4, 136.2, 135.7, 131.9, 129.7, 129.1, 126.4, 91.1, 65.8, 61.4, 61.2, 57.3, 54.8, 54.1, 43.4, 35.1, 34.7, 30.7, 29.0, 20.4, 16.7, 16.6, 14.18, 14.16, 13.9, 9.7. HRMS (ESI):  $[\text{M}+\text{H}]^{\oplus}$  calcd for  $\text{C}_{31}\text{H}_{43}\text{O}_8^{\oplus}$  543.2952, found 539.2958. HPLC analysis: Chiralcel AD-H column; detected at 254 nm, 40 °C; 10%  $i$ PrOH in  $n$ -Hexane; flow = 0.7 mL/min; Retention time: 32.6 min (major), 36.3 min (minor).

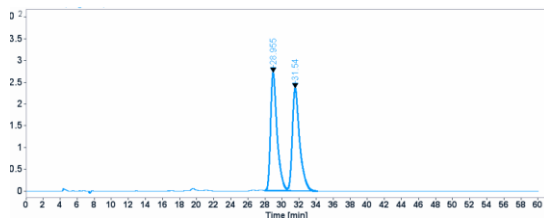

| RT [min] | Width [min] | Area [mAU*S] | Height [mAU] | Area%   |
|----------|-------------|--------------|--------------|---------|
| 28.955   | 0.789       | 14273.158    | 270.095      | 50.4409 |
| 31.540   | 0.893       | 14023.617    | 234.876      | 49.5591 |

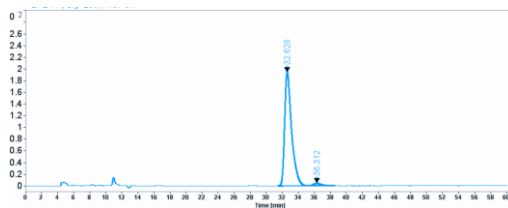

| RT [min] | Width [min] | Area [mAU*S] | Height [mAU] | Area%   |
|----------|-------------|--------------|--------------|---------|
| 32.628   | 0.890       | 11662.672    | 194.805      | 97.7482 |
| 36.312   | 0.866       | 268.671      | 4.268        | 2.2518  |

Supplementary Fig. 35. HPLC of 4g.

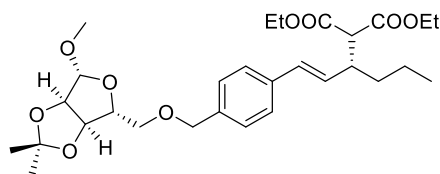

**Diethyl 2-((*R,E*)-1-(4-(((3*aR*,4*R*,6*R*,6*aR*)-6-methoxy-2,2-dimethyltetrahydrofuro[3,4-*d*][1,3]dioxol-4-yl)methoxy)methyl)phenyl)hex-1-en-3-yl)malonate (4h)**

Colorless oil, 80% yield,  $[\alpha]_D^{25}$  -0.30 (*c* 1.5,  $\text{CHCl}_3$ ) for 96:4 dr;  $^1\text{H NMR}$  (500 MHz, chloroform-*d*)  $\delta$  7.31 (d, *J* = 8.0 Hz, 2H), 7.26 (d, *J* = 8.2 Hz, 2H), 6.42 (d, *J* = 15.7 Hz, 1H), 6.03 (dd, *J* = 15.8, 9.7 Hz, 1H), 4.96 (s, 1H), 4.67 (d, *J* = 6.0 Hz, 1H), 4.60 – 4.47 (m, 3H), 4.36 (t, *J* = 7.2 Hz, 1H), 4.21 (q, *J* = 7.1 Hz, 2H), 4.15 – 4.07 (m, 2H), 3.50 (dd, *J* = 9.5, 6.4 Hz, 1H), 3.43 (dd, *J* = 16.9, 8.6 Hz, 2H), 3.29 (s, 3H), 2.99 – 2.89 (m, 1H), 1.56 – 1.49 (m, 2H), 1.46 – 1.35 (m, 2H), 1.35 – 1.23 (m, 9H), 1.18 (t, *J* = 7.1 Hz, 3H), 0.89 (t, *J* = 7.1 Hz, 3H).  $^{13}\text{C NMR}$  (126 MHz,  $\text{CDCl}_3$ )  $\delta$  168.4, 168.3, 137.1, 136.7, 132.1, 130.0, 128.0, 126.3, 112.4, 109.3, 85.22, 85.19, 82.2, 73.0, 71.0, 61.4, 61.3, 57.3, 54.9, 43.4, 35.1, 26.5, 25.1, 20.4, 14.2, 13.9 (one alkyl carbon signal was not observed because of overlapping). HRMS (EI):  $[\text{M}]^{\oplus}$  calcd for  $\text{C}_{29}\text{H}_{42}\text{O}_9$  534.2823, found 5334.2822. HPLC analysis: Chiracel AD-H column; detected at 254 nm, 40 °C; 10% *i*PrOH in *n*-Hexane; flow = 0.7 mL/min; Retention time: 15.2 min (major), 17.0 min (minor).

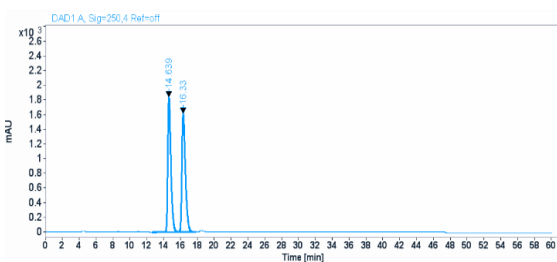

Signal: DAD1 A, Sig=250.4 Ref=off

| RT [min] | Width [min] | Area [mAU*S] | Height [mAU] | Area%   | ee value% |
|----------|-------------|--------------|--------------|---------|-----------|
| 14.639   | 0.392       | 47518.449    | 1837.856     | 50.6710 | RAC       |
| 16.330   | 0.436       | 46259.934    | 1614.657     | 49.3290 |           |

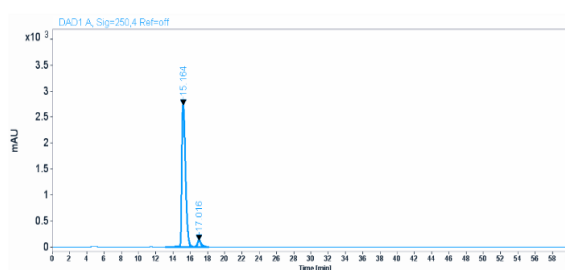

Signal: DAD1 A, Sig=250.4 Ref=off

| RT [min] | Width [min] | Area [mAU*S] | Height [mAU] | Area%   | ee value% |
|----------|-------------|--------------|--------------|---------|-----------|
| 15.164   | 0.464       | 81190.961    | 2724.909     | 95.9977 | 91.995    |
| 17.016   | 0.437       | 3384.995     | 117.070      | 4.0023  |           |

Supplementary Fig. 36. HPLC of 4h.

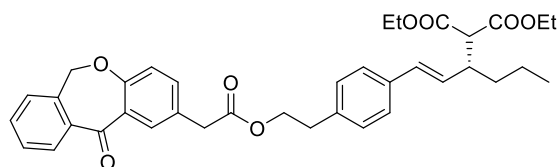

**Diethyl (*R,E*)-2-(1-(4-(2-(2-(11-oxo-6,11-dihydrodibenzo[b,e]oxepin-2-yl)acetoxy)ethyl)phenyl)hex-1-en-3-yl)malonate (**4i**)**

Colorless oil, 61% yield,  $[\alpha]_D^{25} +20.6$  (*c* 3.6,  $\text{CHCl}_3$ ) for 98:2 er;  $^1\text{H NMR}$  (500 MHz, chloroform-*d*)  $\delta$  8.11 (d,  $J = 2.4$  Hz, 1H), 7.89 (dd,  $J = 7.8, 1.3$  Hz, 1H), 7.55 (td,  $J = 7.5, 1.3$  Hz, 1H), 7.47 (td,  $J = 7.6, 1.1$  Hz, 1H), 7.39 – 7.32 (m, 2H), 7.24 (d,  $J = 7.9$  Hz, 2H), 7.09 (d,  $J = 7.8$  Hz, 2H), 7.00 (d,  $J = 8.5$  Hz, 1H), 6.40 (d,  $J = 15.8$  Hz, 1H), 6.00 (dd,  $J = 15.8, 9.7$  Hz, 1H), 5.18 (s, 2H), 4.29 (t,  $J = 7.0$  Hz, 2H), 4.23 – 4.18 (m, 2H), 4.14 – 4.08 (m, 2H), 3.61 (s, 2H), 3.41 (d,  $J = 8.9$  Hz, 1H), 2.99 – 2.86 (m, 3H), 1.56 – 1.46 (m, 1H), 1.45 – 1.34 (m, 2H), 1.31 – 1.23 (m, 4H), 1.17 (t,  $J = 7.1$  Hz, 3H), 0.89 (t,  $J = 7.1$  Hz, 3H).  $^{13}\text{C NMR}$  (126 MHz,  $\text{CDCl}_3$ )  $\delta$  190.8, 171.3, 168.4, 168.2, 160.5, 140.4, 136.8, 136.3, 135.6, 135.5, 132.8, 132.5, 132.0, 129.5, 129.5, 129.3, 129.1, 127.8, 127.7, 126.3, 125.1, 121.0, 73.6, 65.4, 61.3, 61.2, 57.3, 43.3, 40.2, 35.0, 34.7, 20.4, 14.15, 14.14, 13.9. HRMS (ESI):  $[\text{M}+\text{H}]^{\oplus}$  calcd for  $\text{C}_{37}\text{H}_{41}\text{O}_8^{\oplus}$  613.2796, found 613.2794. HPLC analysis: Chiracel (AD-H)+(AD-H) column; detected at 254 nm, 40 °C; 8% *i*PrOH in *n*-Hexane; flow = 0.7 mL/min; Retention time: 144.5 min (major), 154.2 min (minor).

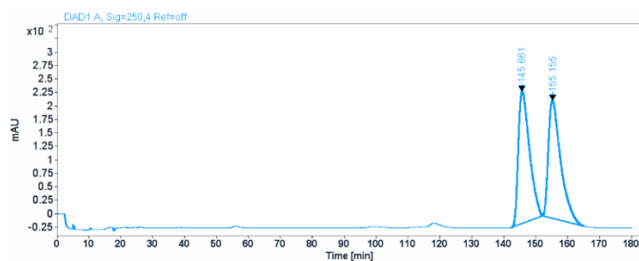

Signal: DAD1 A, Sig=250,4 Ref=off

| RT [min] | Width [min] | Area [mAU*s] | Height [mAU] | Area%   | ee value% |
|----------|-------------|--------------|--------------|---------|-----------|
| 145.661  | 2.834       | 59318.648    | 244.920      | 50.1797 | RAC       |
| 155.155  | 3.159       | 58893.738    | 218.065      | 49.8203 |           |

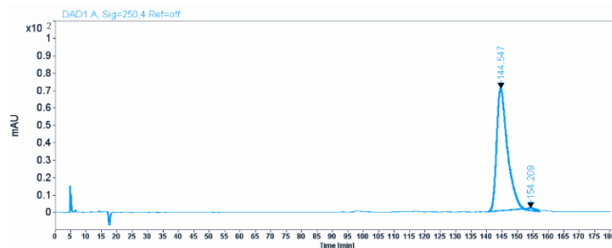

Signal: DAD1 A, Sig=250,4 Ref=off

| RT [min] | Width [min] | Area [mAU*s] | Height [mAU] | Area%   | ee value% |
|----------|-------------|--------------|--------------|---------|-----------|
| 144.547  | 2.854       | 17131.633    | 70.223       | 98.4972 | 96.994    |
| 154.209  | 3.265       | 261.384      | 1.334        | 1.5028  |           |

**Supplementary Fig. 37. HPLC of 4i.**

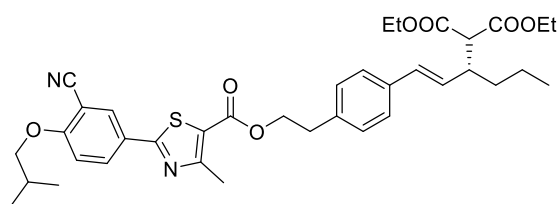

**Diethyl (*R,E*)-2-(1-(4-(2-((2-(3-cyano-4-isobutoxyphenyl)-4-methylthiazole-5-carbonyl)oxy)ethyl)phenyl)hex-1-en-3-yl)malonate (**4j**)**

Colorless oil, 57% yield,  $[\alpha]_D^{25} +17.4$  (*c* 2.9,  $\text{CHCl}_3$ ) for 98:2 er;  $^1\text{H NMR}$  (500 MHz, chloroform-*d*)  $\delta$  8.17 (d,  $J = 2.4$  Hz, 1H), 8.08 (dd,  $J = 8.9, 2.4$  Hz, 1H), 7.30 (d,  $J = 7.9$  Hz, 2H), 7.20 (d,  $J = 8.0$  Hz, 2H), 7.02 (d,  $J = 8.8$  Hz, 1H), 6.42 (d,  $J = 15.7$  Hz, 1H), 6.03 (dd,  $J = 15.8, 9.7$  Hz, 1H), 4.48 (t,  $J = 6.8$  Hz,

2H), 4.22 – 4.18 (m, 2H), 4.14 – 4.08 (m, 2H), 3.90 (d,  $J = 6.5$  Hz, 2H), 3.41 (d,  $J = 8.8$  Hz, 1H), 3.03 (t,  $J = 6.8$  Hz, 2H), 2.99 – 2.90 (m, 1H), 2.72 (s, 3H), 2.23 – 2.18 (m, 1H), 1.56 – 1.46 (m, 1H), 1.46 – 1.36 (m, 3H), 1.31 – 1.24 (m, 7H), 1.17 (t,  $J = 7.2$  Hz, 3H), 1.09 (d,  $J = 6.7$  Hz, 6H), 0.89 (t,  $J = 7.1$  Hz, 3H).  $^{13}\text{C}$  NMR (126 MHz,  $\text{CDCl}_3$ )  $\delta$  168.4, 168.3, 167.3, 162.5, 161.9, 161.3, 136.7, 135.7, 132.6, 132.1, 132.0, 129.7, 129.1, 126.5, 126.0, 121.6, 115.4, 112.6, 102.9, 75.7, 65.8, 61.4, 61.2, 57.3, 43.4, 35.0, 34.8, 28.2, 20.4, 19.1, 17.5, 14.1, 13.9 (one alkyl carbon signal was not observed because of overlapping). HRMS (ESI):  $[\text{M}+\text{H}]^{\oplus}$  calcd for  $\text{C}_{37}\text{H}_{45}\text{O}_7\text{N}_2\text{S}^{\oplus}$  661.2942, found 661.2936. HPLC analysis: Chiracel AD-H column; detected at 254 nm, 40 °C; 20% *i*-PrOH in *n*-Hexane; flow = 0.7 mL/min; Retention time: 28.2 min (major), 30.8 min (minor).

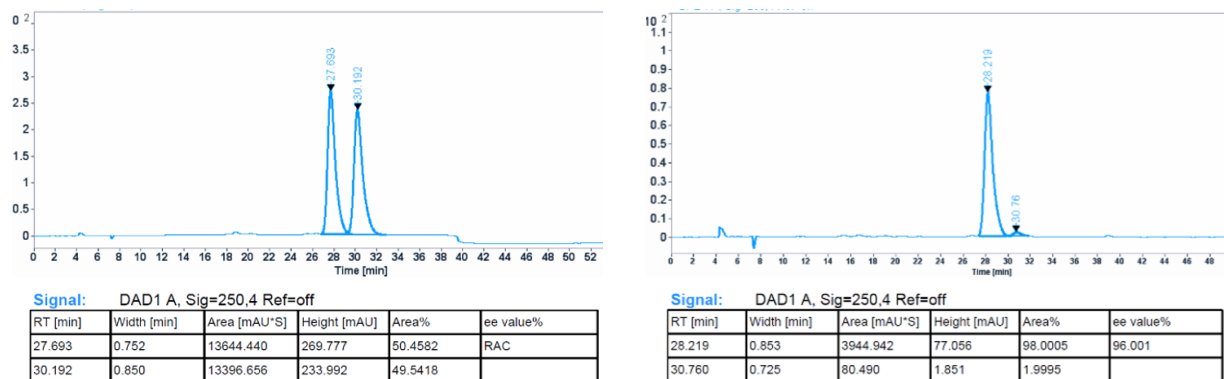

Supplementary Fig. 38. HPLC of **4j**.

## 5. Chain walking test of different nucleophiles

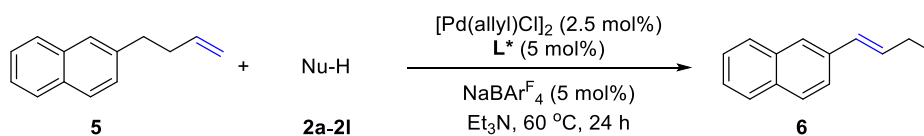

General procedure: To a 4 mL vial in the glovebox under nitrogen were added  $[\text{Pd}(\text{allyl})\text{Cl}]_2$  (0.90 mg, 0.0025 mmol), **L** (2.8 mg, 0.0050 mmol), sodium tetrakis[3,5-bis(trifluoromethyl)phenyl]borate ( $\text{NaBAR}_4^{\text{F}_4}$ , 4.4 mg, 0.0050 mmol) and dry  $\text{Et}_3\text{N}$  (0.2 mL). The mixture was stirred at room temperature for 5 min. Then 2-(but-3-en-1-yl)naphthalene **5** (20 mg, 0.11 mmol) was added to the solution and the reaction continued to stir for 1 min. Finally, the nucleophile **2** (0.1 mmol) was added to the reaction and the resulting mixture was stirred at 60 °C for 24 h. After this time, the reaction solution was cooled to room temperature, condensed and crude  $^1\text{H}$  NMR was obtained with dibromomethane (7  $\mu\text{L}$ , 0.1 mmol) as internal standard to help determine the reaction results.

The procedure for the test of migratory allylic substitution with different nucleophiles was the same as that described in the above part “General procedure for Pd-catalyzed migratory allylic substitution”.

|                     |           |           |           |           |
|---------------------|-----------|-----------|-----------|-----------|
|                     |           |           |           |           |
|                     | <b>2e</b> | <b>2f</b> | <b>2g</b> | <b>2h</b> |
| pKa in DMSO:        | ~ 9.1     | 10.3      | 11.1      | 12.2      |
| Yield of <b>6</b> : | 46%       | 78%       | 56%       | 76%       |
| Yield of <b>3</b> : | N.D.      | N.D.      | trace     | <10%      |
| <hr/>               |           |           |           |           |
|                     |           |           |           |           |
|                     | <b>2d</b> | <b>2c</b> | <b>2b</b> | <b>2a</b> |
| pKa in DMSO:        | 13.3      | ~14.2     | 15.9      | 16.4      |
| Yield of <b>6</b> : | 49%       | 79%       | 75%       | 84%       |
| Yield of <b>3</b> : | 45%       | 68%       | 74%       | 82%       |
| <hr/>               |           |           |           |           |
|                     |           |           |           |           |
|                     | <b>2i</b> | <b>2j</b> | <b>2k</b> | <b>2l</b> |
| pKa in DMSO:        | 18.2      | 21.9      | 22.7      | ~ 24.4    |
| Yield of <b>6</b> : | 55%       | 14%       | N.D.      | N.D.      |
| Yield of <b>3</b> : | N.D.      | N.D.      | N.D.      | N.D.      |

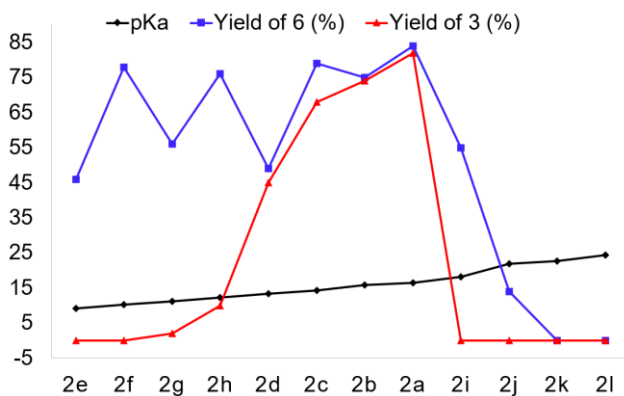

**Supplementary Fig. 39.** Chain-walking test of different nucleophiles.



## 6. Substrates ineffective for the migratory allylation

### 6.1 Test of diene substrates ineffective for the transformation

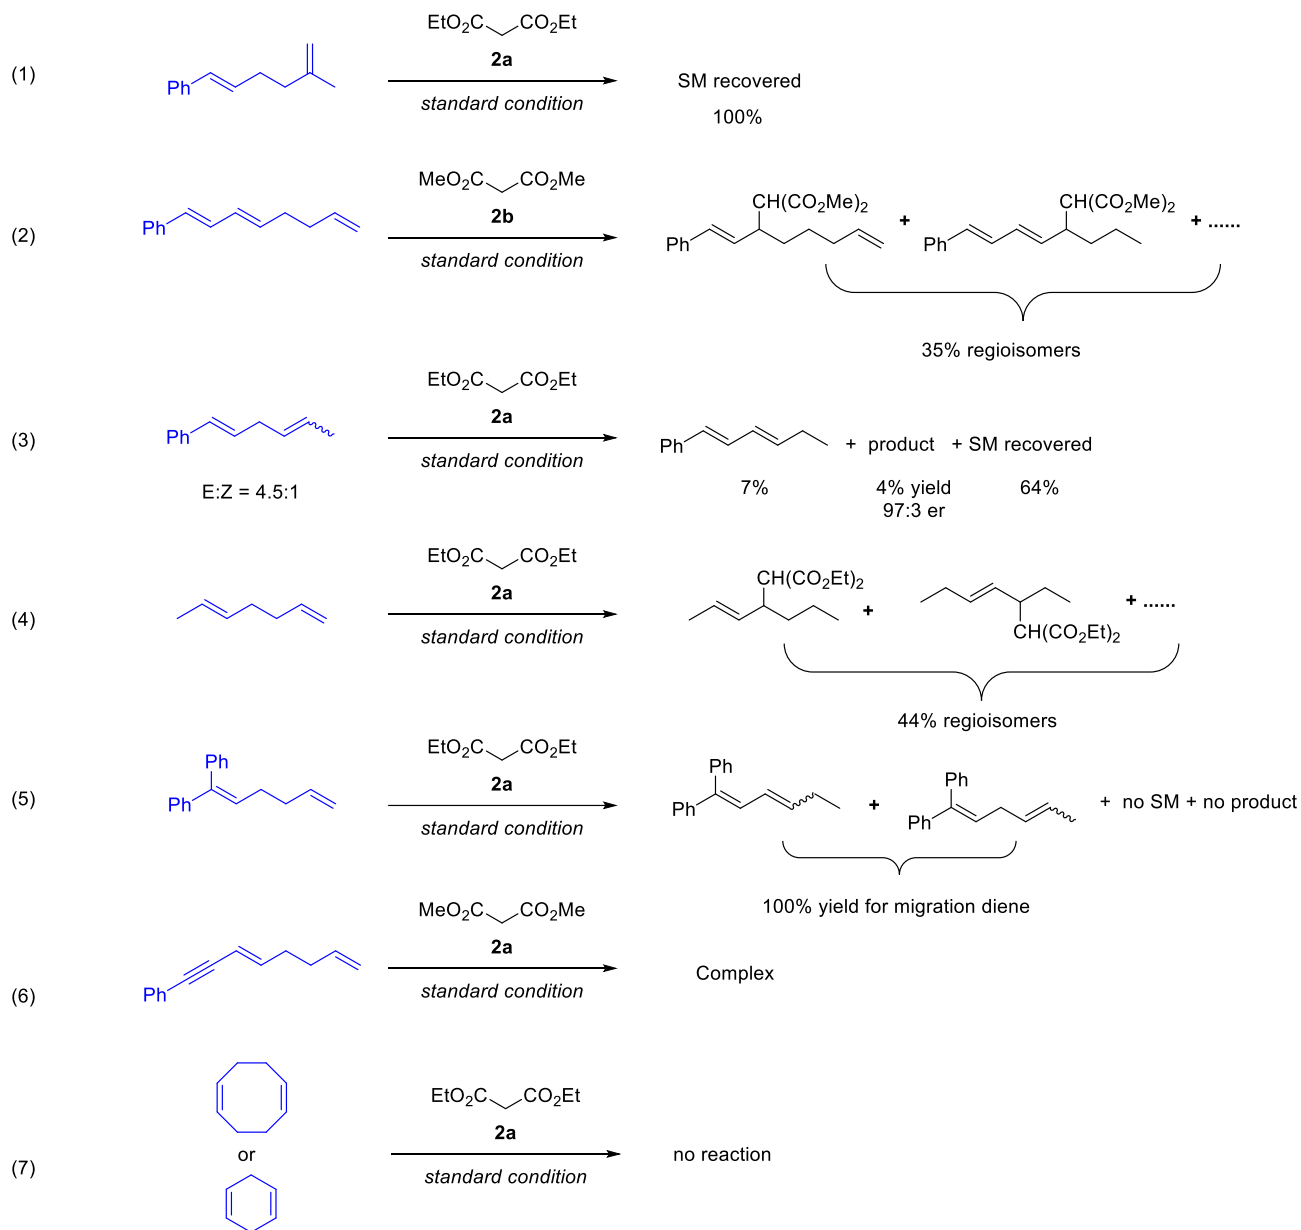

Supplementary Fig. 40. Other ineffective substrates tested for migratory allylation.

## 6.2 Test of nucleophiles ineffective for the transformation

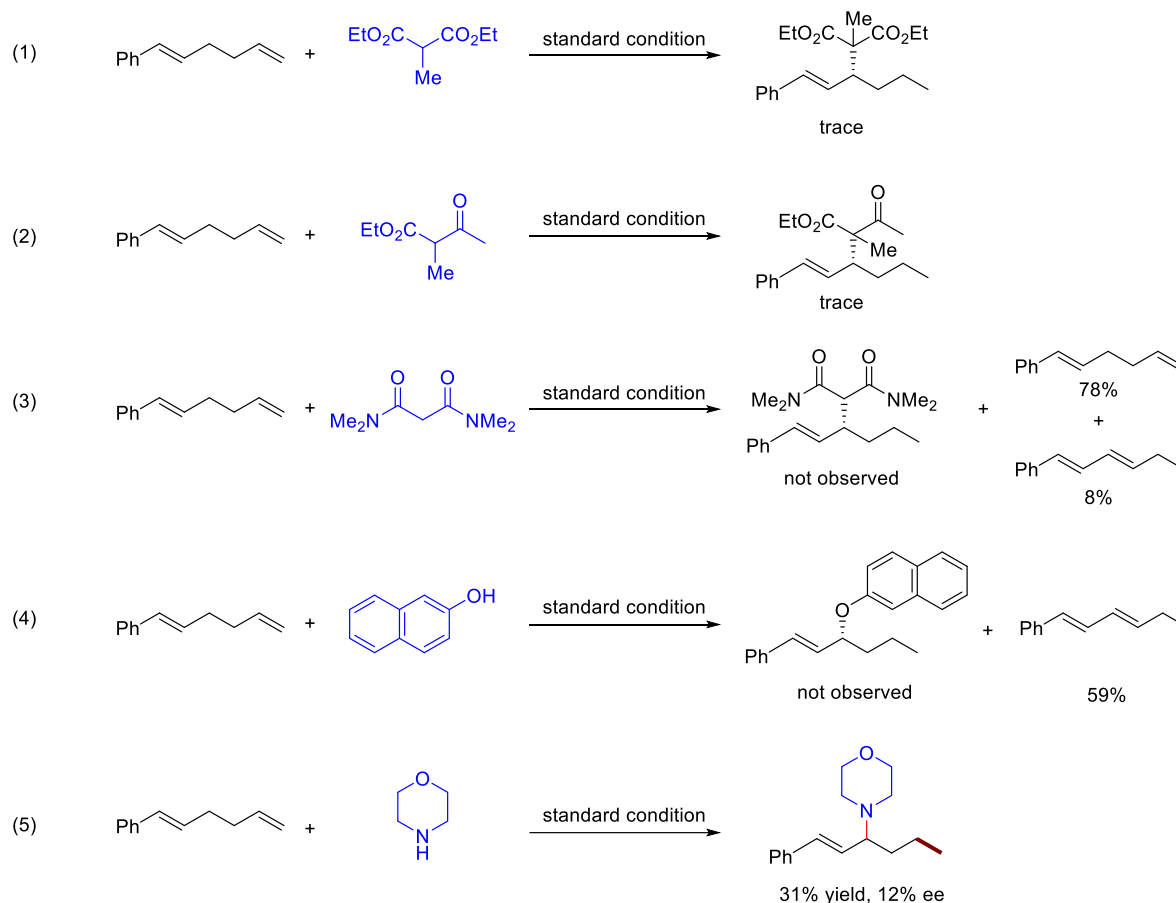

Supplementary Fig. 41. More substrates tested for migratory allylation.

## 7. Mechanistic studies

### 7.1 Control experiment

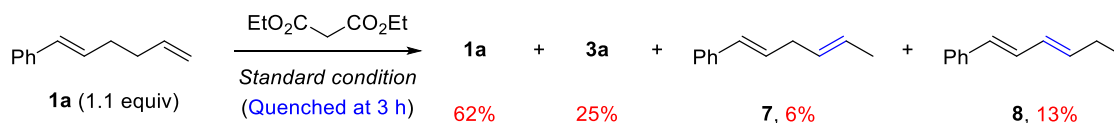

To a 4 mL vial in the glovebox under nitrogen were added [Pd(allyl)Cl]<sub>2</sub> (1.8 mg, 0.0050 mmol), **L** (5.6 mg, 0.010 mmol), sodium tetrakis[3,5-bis(trifluoromethyl)phenyl]borate (NaBAr<sup>F</sup><sub>4</sub>, 8.8 mg, 0.010 mmol) and dry Et<sub>3</sub>N (0.2 mL). The mixture was stirred at room temperature for 5 min. Then the remote diene **1a** (35 mg, 0.22 mmol) was added to the solution and the reaction continued to stir for 1 min. Finally, the



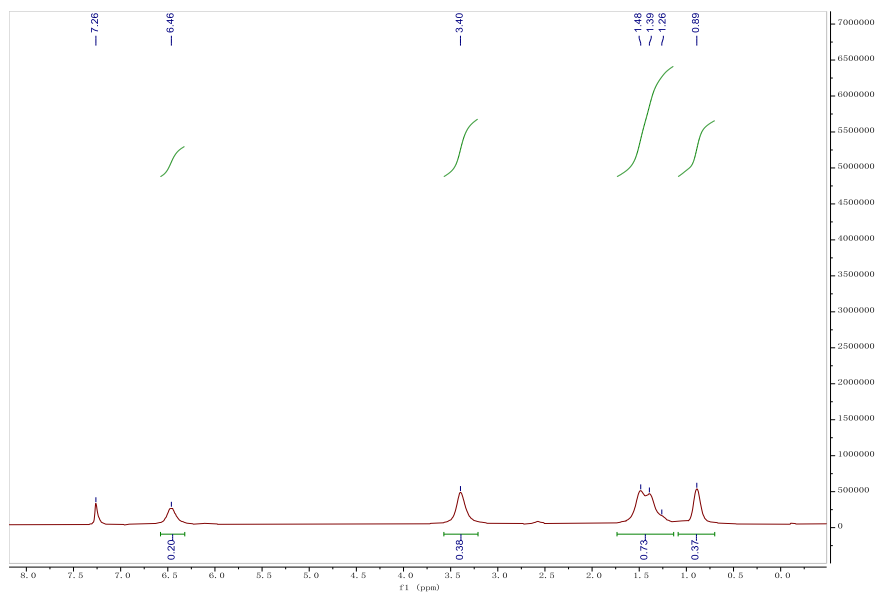

**Supplementary Fig. 42.**  $^1\text{H}$  NMR and  $^2\text{D}$  NMR of *d*-**3a**.

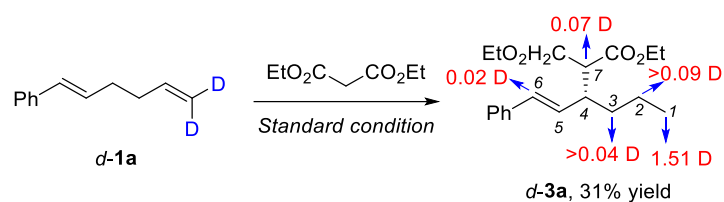

The procedure for deuteration experiment with deuterated-**1a** as electrophile was the same as that described in the above part “General procedure for Pd-catalyzed migratory allylic substitution”. The *d*-**3a** was isolated in 31% yield and according  $^1\text{H}$  NMR and  $^2\text{D}$  NMR were shown as below.

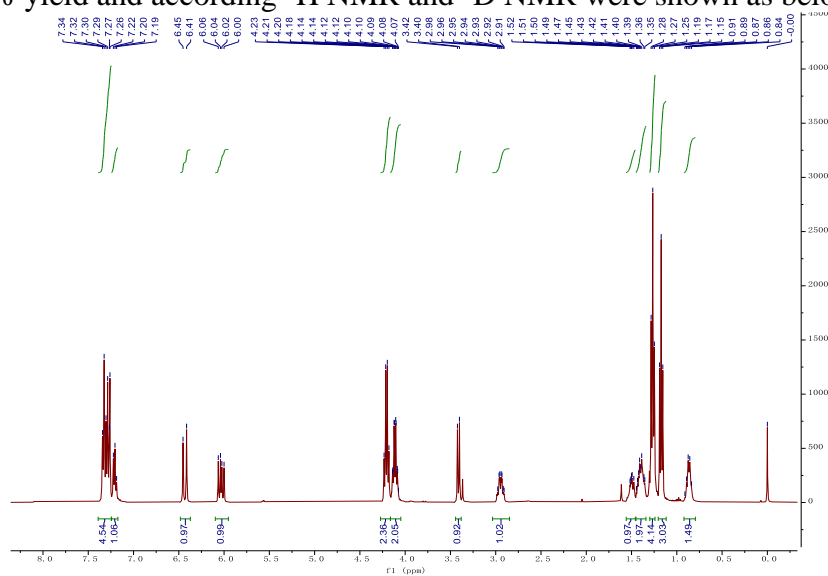

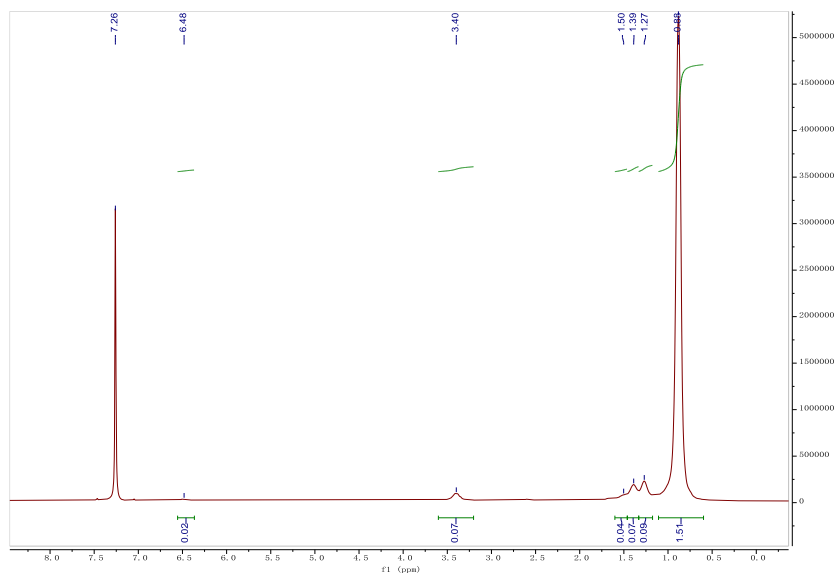

Supplementary Fig. 43.  $^1\text{H}$  NMR and  $^2\text{D}$  NMR of *d*-**3a**.

### 7.3 Crossover experiment

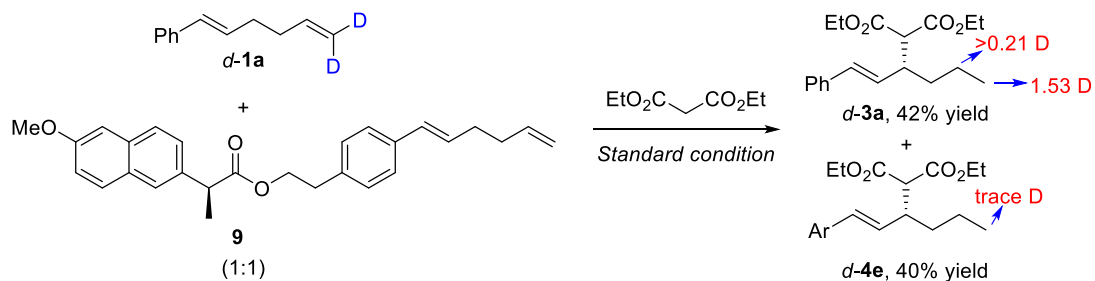

The procedure for crossover experiment with deuterated-**1a** and another diene **9** as competing electrophiles (Each electrophile was used in 0.055 mmol under standard condition) was the same as that described in the above part “General procedure for Pd-catalyzed migratory allylic substitution”. The allylation product *d*-**3a** and *d*-**4e** were isolated in 42% and 40% yield respectively.

The related  $^1\text{H}$  NMR of isolated *d*-**3a** was shown as below.

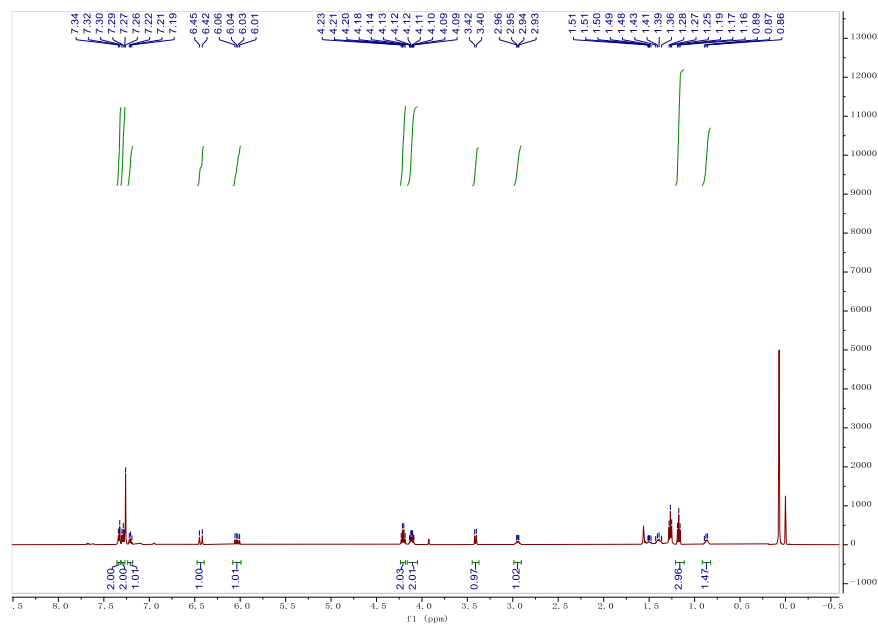

**Supplementary Fig. 44.**  $^1\text{H}$  NMR of *d-3a*.

The related  $^2\text{D}$  NMR of isolated *d-3a* was shown as below.

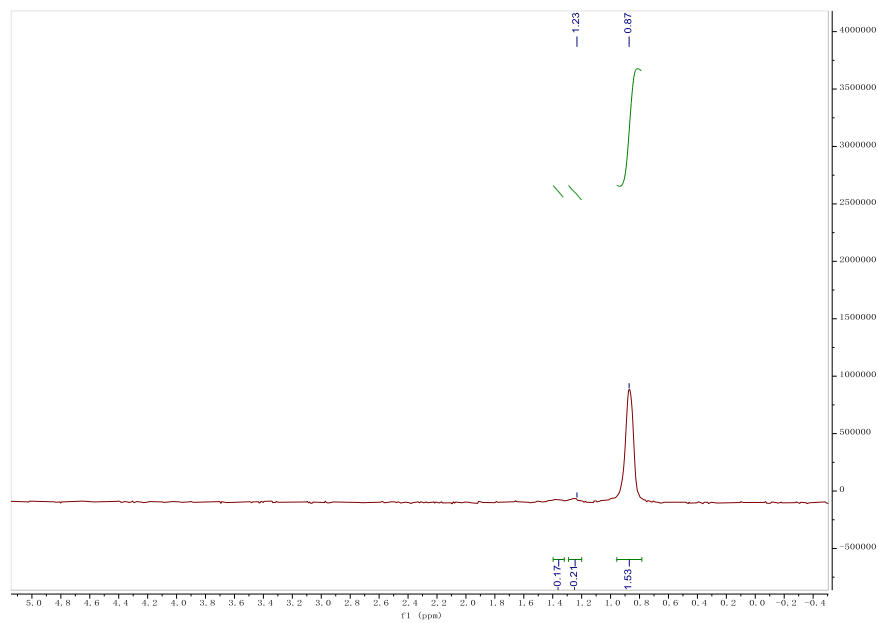

**Supplementary Fig. 45.**  $^2\text{D}$  NMR of compound *d-3a*.

The related  $^2\text{D}$  NMR of isolated *d-4e* was shown as below.

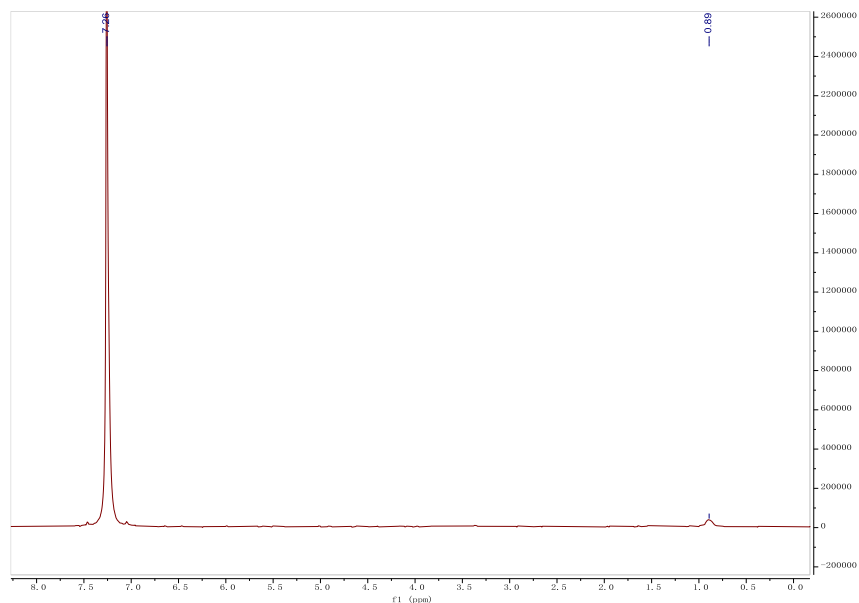

**Supplementary Fig. 46.**  $^2\text{D}$  NMR of compound *d-4e*.

#### 7.4 Kinetic isotope experiment

The non-deuteration experiment was conducted as the following procedure: To a 25 mL Schlenk tube in a  $\text{N}_2$  box was added  $[\text{Pd}(\text{allyl})\text{Cl}]_2$  (4.6 mg, 0.013 mmol), **L9** (14 mg, 0.025 mmol), sodium tetrakis[3,5-bis(trifluoromethyl)phenyl]borate ( $\text{NaBAR}^{\text{F}_4}$ , 22 mg, 0.025 mmol) and dry  $\text{Et}_3\text{N}$  (5 mL). The mixture was then stirred at 25 °C for 5 min. Next, dodecane (0.050 mL, 38 mg, 0.22 mmol) and skipped diene **1a** (79 mg, 0.50 mmol) were added sequentially. After the mixture was stirred for 1 min, nucleophile **2a** (80 mg, 0.50 mmol) was added to the reaction. The reaction was stirred at 60 °C and analyzed by GC.

The deuteration experiment was conducted similarly as above, except that *d-2a* (81 mg, 0.50 mmol) was used instead.

## KIE experiments, K1/K2=1.04

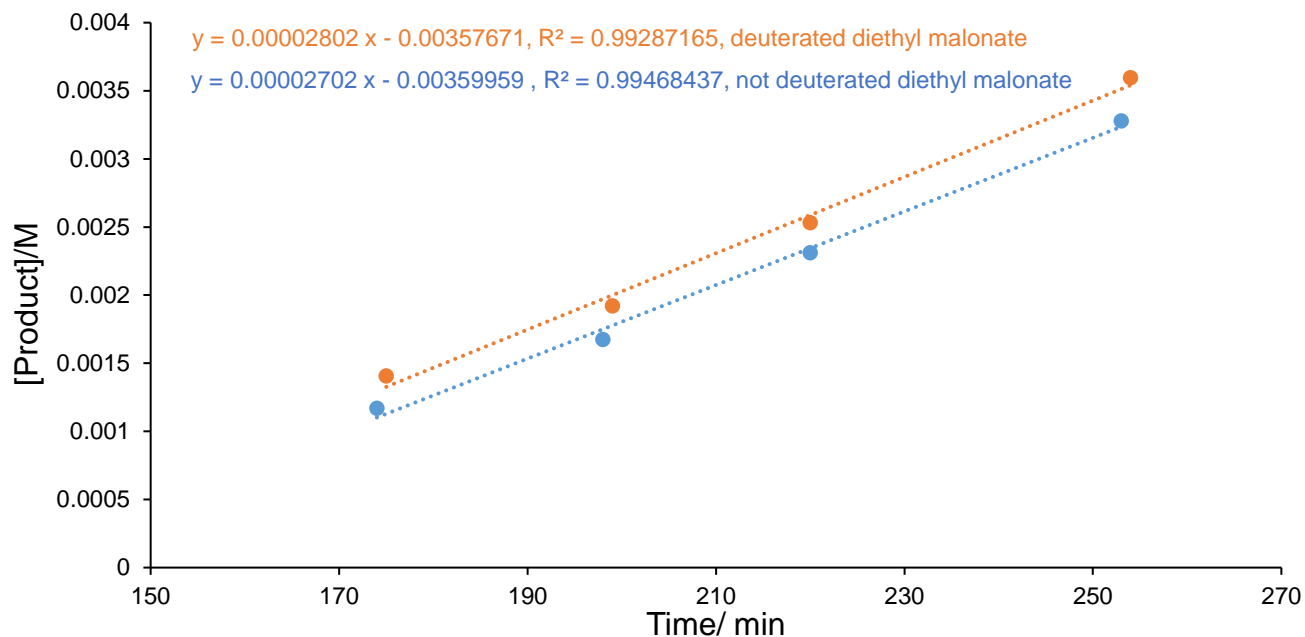

Supplementary Fig. 47. KIE test.

The KIE value was calculated as below:

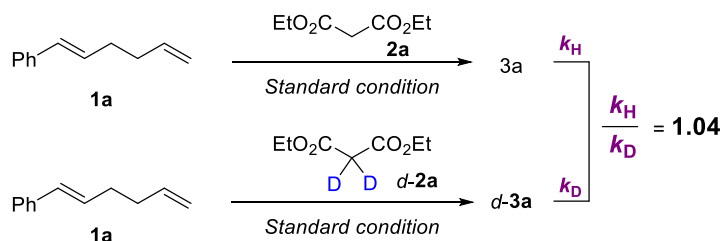

## 7.5 Kinetic studies

### 7.5.1 Kinetic order of nucleophile 2a

To a 25 mL Schlenk tube in a N<sub>2</sub> box was added [Pd(allyl)Cl]<sub>2</sub>, **L9**, sodium tetrakis[3,5-bis(trifluoromethyl)phenyl]borate (NaBAR<sub>F</sub><sup>4</sup>) and dry Et<sub>3</sub>N. The mixture was then stirred at 25 °C for 5 min. Next, dodecane and skipped diene **1a** were added sequentially. After the mixture was stirred for 1 min, nucleophile **2a** was added to the reaction. The reaction was stirred at 60 °C and analyzed by GC along time. The detailed amount of each substrate was shown in the table below.

Supplementary Table 1. The amount of materials used for kinetic order test of **2a**.

|       |    |           |                                 |                   |           |           |          |
|-------|----|-----------|---------------------------------|-------------------|-----------|-----------|----------|
| Entry | Pd | <b>L9</b> | NaBAR <sub>F</sub> <sup>4</sup> | Et <sub>3</sub> N | <b>1a</b> | <b>2a</b> | Dodecane |
|-------|----|-----------|---------------------------------|-------------------|-----------|-----------|----------|



|   | mg  | mg   | mg   | mL | mg | mg    | mmol | c / mol*L <sup>-1</sup> | mg   |
|---|-----|------|------|----|----|-------|------|-------------------------|------|
| 1 | 4.6 | 13.9 | 22.2 | 5  | 80 | 96.6  | 0.60 | 0.12                    | 37.7 |
| 2 | 4.6 | 13.9 | 22.2 | 5  | 80 | 112.2 | 0.70 | 0.14                    | 37.7 |
| 3 | 4.6 | 13.9 | 22.2 | 5  | 80 | 159.3 | 1.00 | 0.20                    | 37.7 |

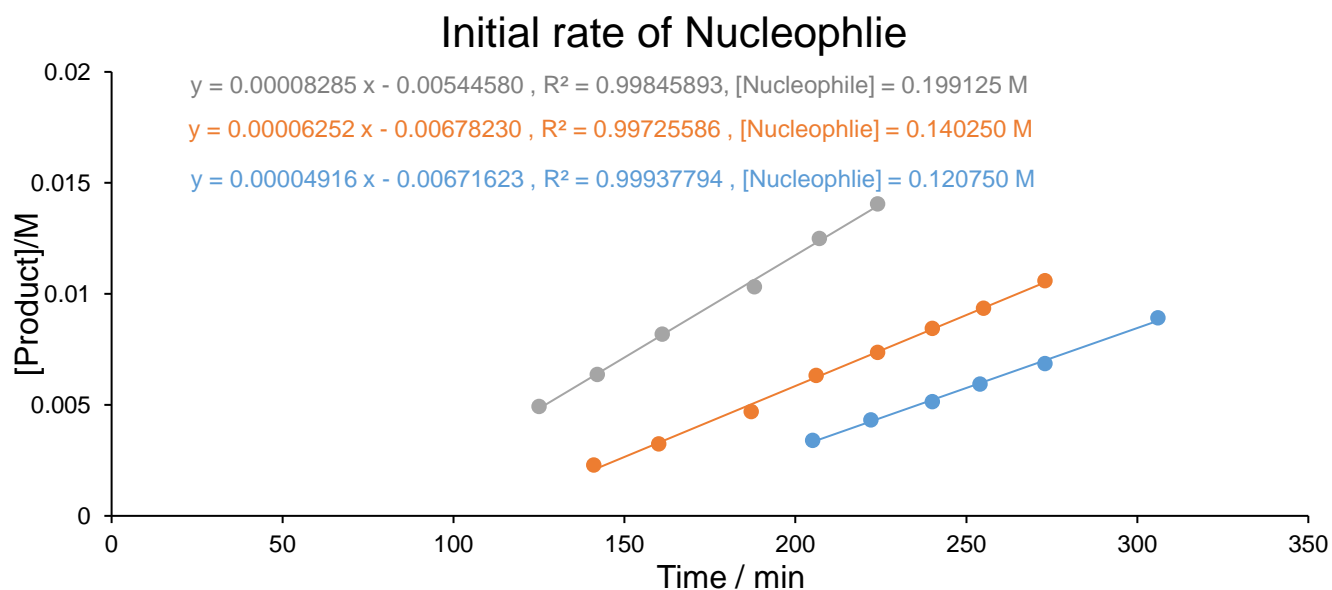

**Supplementary Fig. 48.** Plot of concentration of **3a** over time with reactions performed with varying concentration of **2a**

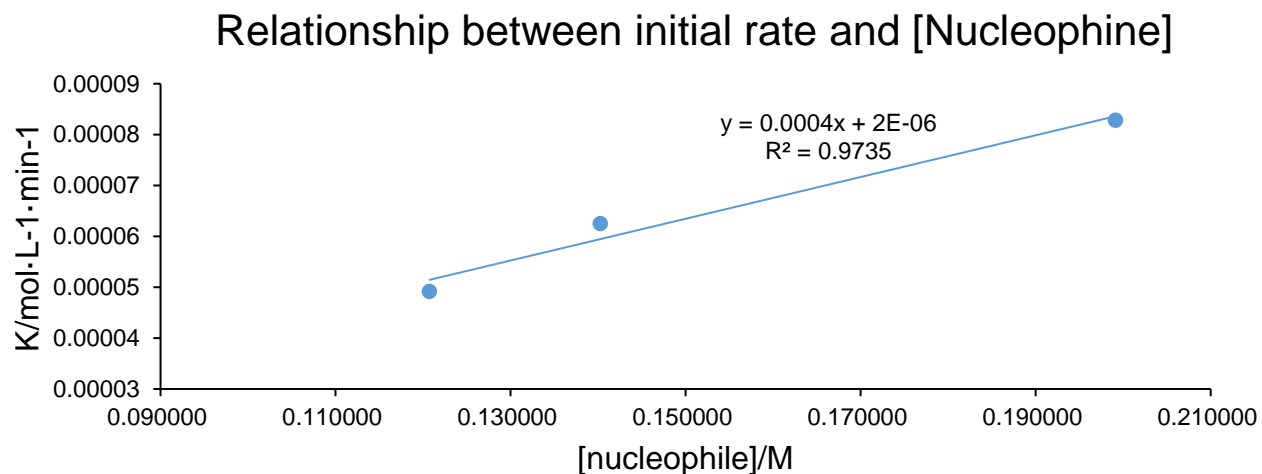

**Supplementary Fig. 49.** Plot of the initial rates of formation of **3a** vs. **[2a]** for the migratory allylation reaction.

## Kinetic order of [nucleophile]

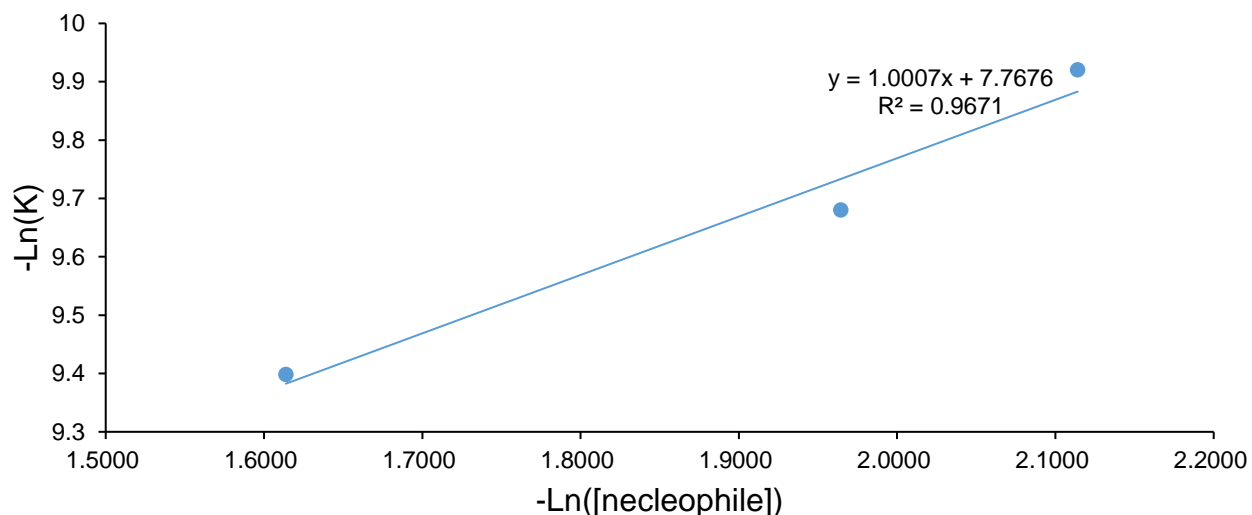

**Supplementary Fig. 50.** Plot of  $\ln(\text{Initial Rates})$  vs.  $\ln(\mathbf{2a})$  for the migratory allylation reaction.

### 7.5.2 Kinetic order of catalyst

To a 25 mL Schlenk tube in a  $\text{N}_2$  box was added  $[\text{Pd}(\text{allyl})\text{Cl}]_2$ , **L9**, sodium tetrakis[3,5-bis(trifluoromethyl)phenyl]borate ( $\text{NaBAr}_4^{\text{F}}$ ) and dry  $\text{Et}_3\text{N}$ . The mixture was then stirred at 25 °C for 5 min. Next, dodecane and skipped diene **1a** were added sequentially. After the mixture was stirred for 1 min, nucleophile **2a** was added to the reaction. The reaction was stirred at 60 °C and analyzed by GC along time. The detailed amount of each substrate was shown in the table below.

**Supplementary Table 2.** The amount of materials used for kinetic order test of catalyst.

| Entry | Pd    |     |        | <b>L9</b> |      |       | $\text{NaBAr}_4^{\text{F}}$ |      |       | $\text{Et}_3\text{N}$ | <b>1a</b> | <b>2a</b> | Dodecane |
|-------|-------|-----|--------|-----------|------|-------|-----------------------------|------|-------|-----------------------|-----------|-----------|----------|
|       | mmol  | mg  | c / M  | mmol      | mg   | c / M | mmol                        | mg   | c / M | mL                    | mg        | mg        | mg       |
| 1     | 0.005 | 1.8 | 0.0010 | 0.01      | 5.5  | 0.002 | 0.01                        | 8.9  | 0.002 | 5                     | 79        | 80        | 37.7     |
| 2     | 0.01  | 3.7 | 0.0019 | 0.02      | 11.1 | 0.004 | 0.02                        | 17.7 | 0.004 | 5                     | 79        | 80        | 37.7     |
| 3     | 0.015 | 5.5 | 0.0029 | 0.03      | 16.6 | 0.006 | 0.03                        | 26.6 | 0.006 | 5                     | 79        | 80        | 37.7     |
| 4     | 0.02  | 7.3 | 0.0038 | 0.04      | 22.2 | 0.008 | 0.04                        | 35.4 | 0.008 | 5                     | 79        | 80        | 37.7     |
| 5     | 0.025 | 9.1 | 0.0048 | 0.05      | 27.7 | 0.010 | 0.05                        | 44.3 | 0.010 | 5                     | 79        | 80        | 37.7     |

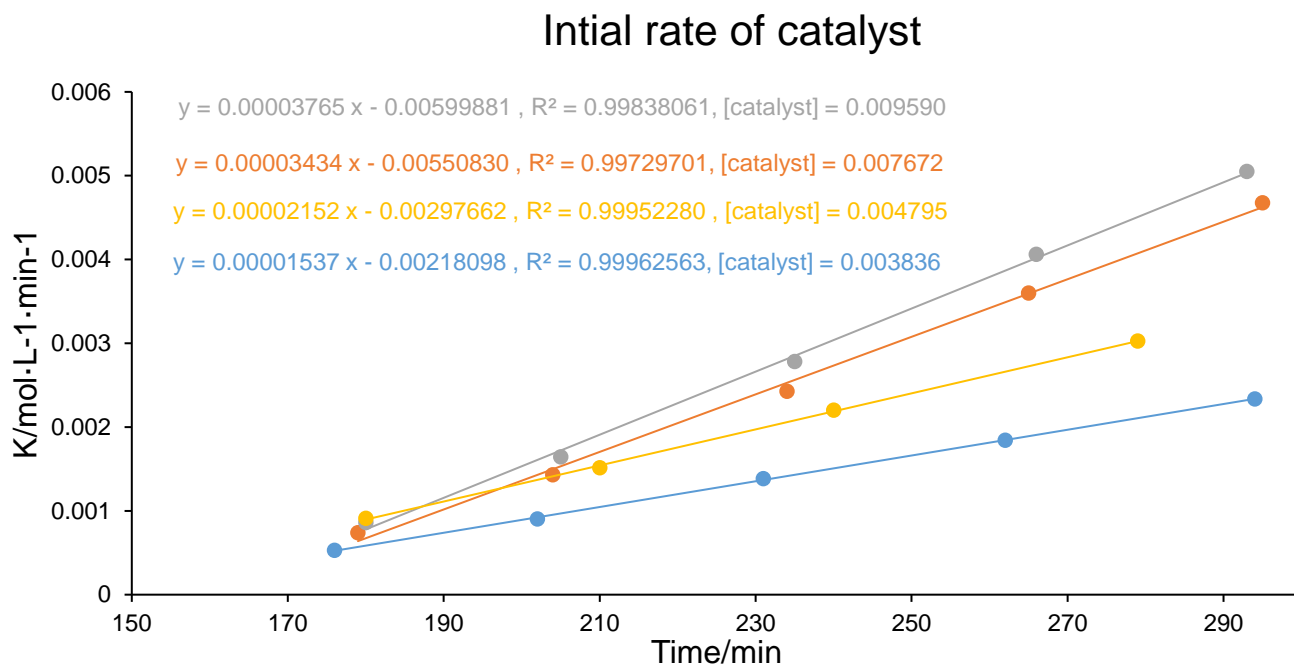

**Supplementary Fig. 51.** Plot of concentration of **3a** over time with reactions performed with varying concentration of catalyst.

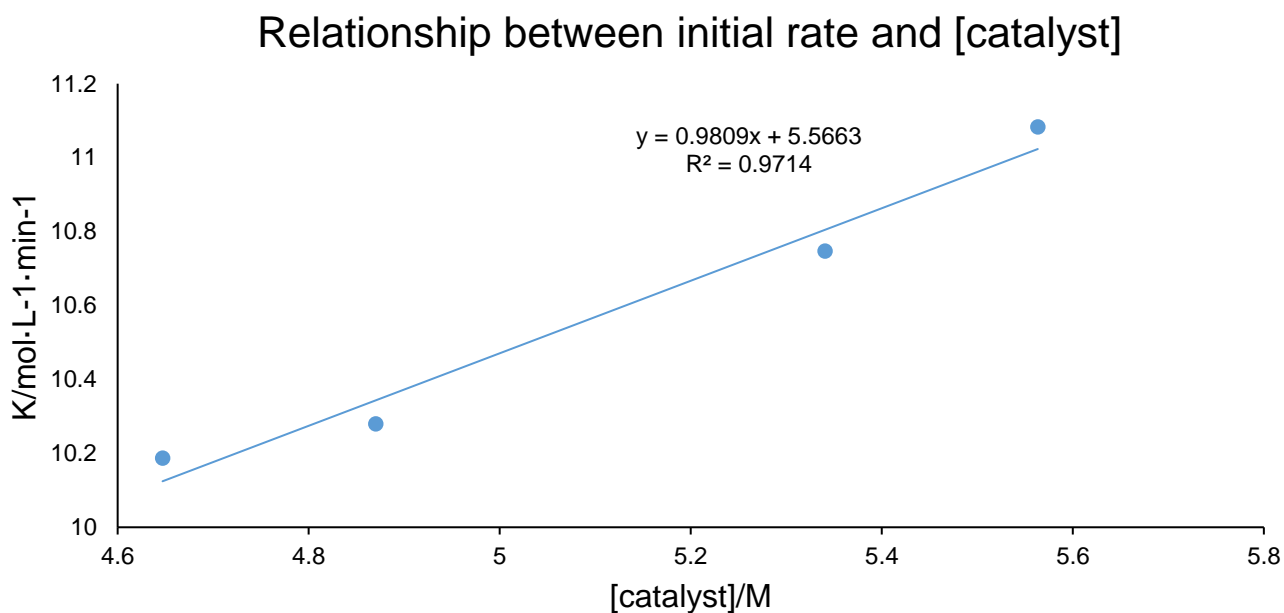

**Supplementary Fig. 52.** Plot of the initial rates of formation of **3a** vs. [catalyst] for the migratory allylation reaction.

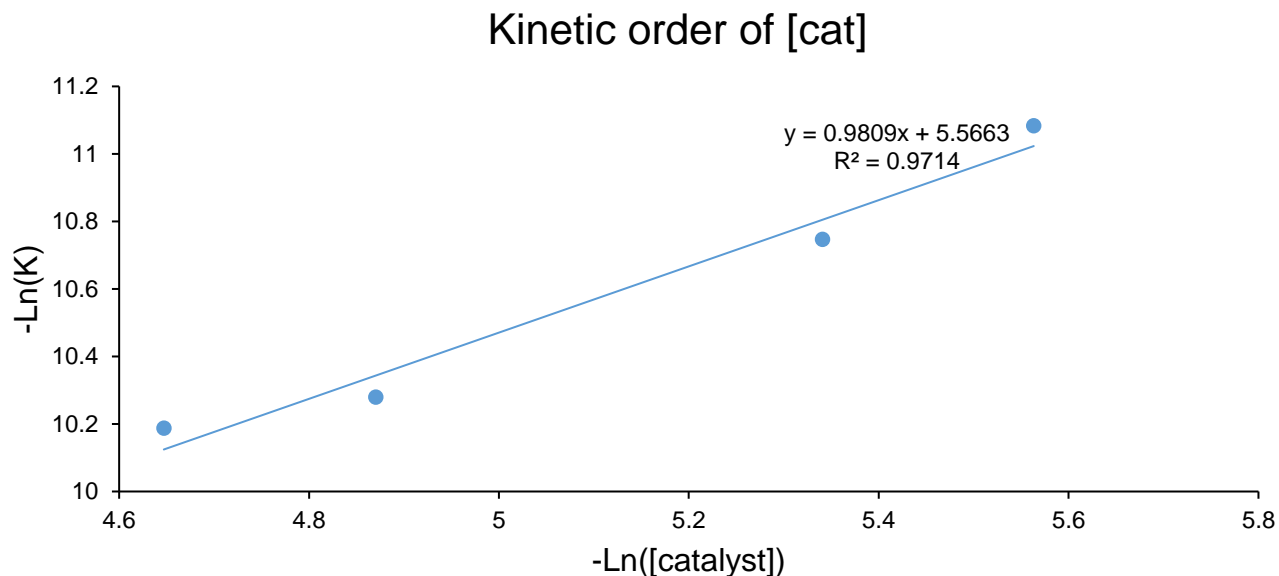

**Supplementary Fig. 53.** Plot of  $\ln(\text{Initial Rates})$  vs.  $\ln(\text{catalyst})$  for the migratory allylation reaction.

### 7.5.3 Kinetic studies on diene **1a**

To a 25 mL Schlenk tube in a  $\text{N}_2$  box was added  $[\text{Pd}(\text{allyl})\text{Cl}]_2$ , **L9**, sodium tetrakis[3,5-bis(trifluoromethyl)phenyl]borate ( $\text{NaBAr}_4^{\text{F}}$ ) and dry  $\text{Et}_3\text{N}$ . The mixture was then stirred at 25 °C for 5 min. Next, dodecane and skipped diene **1a** were added sequentially. After the mixture was stirred for 1 min, nucleophile **2a** was added to the reaction. The reaction was stirred at 60 °C and analyzed by GC along time. The detailed amount of each substrate was shown in the table below.

**Supplementary Table 3.** The amount of each material used for kinetic order test of **1a**.

| Entry | Pd  | <b>L9</b> | $\text{NaBAr}_4^{\text{F}}$ | $\text{Et}_3\text{N}$ | <b>1a</b> |       |       | <b>2a</b> | dodecane | Additional $\text{Et}_3\text{N}/\text{mL}$ | Total volume/<br>mL |
|-------|-----|-----------|-----------------------------|-----------------------|-----------|-------|-------|-----------|----------|--------------------------------------------|---------------------|
|       | mg  | mg        | mg                          | mL                    | mmol      | mg    | c / M | mg        | mg       |                                            |                     |
| 1     | 4.6 | 13.9      | 22.2                        | 5                     | 0.60      | 95.1  | 0.108 | 79        | 37.7     | 0.251                                      | 5.487               |
| 2     | 4.6 | 13.9      | 22.2                        | 5                     | 1.00      | 157.8 | 0.179 | 79        | 37.7     | 0.180                                      | 5.487               |
| 3     | 4.6 | 13.9      | 22.2                        | 5                     | 1.20      | 190.2 | 0.216 | 79        | 37.7     | 0.143                                      | 5.487               |
| 4     | 4.6 | 13.9      | 22.2                        | 5                     | 1.50      | 237.6 | 0.270 | 79        | 37.7     | 0.089                                      | 5.487               |
| 5     | 4.6 | 13.9      | 22.2                        | 5                     | 2.00      | 316.6 | 0.359 | 79        | 37.7     | 0.000                                      | 5.487               |

The initial kinetic data of **1a** fits perfectly with Michaelis-Menten kinetic model as shown below:

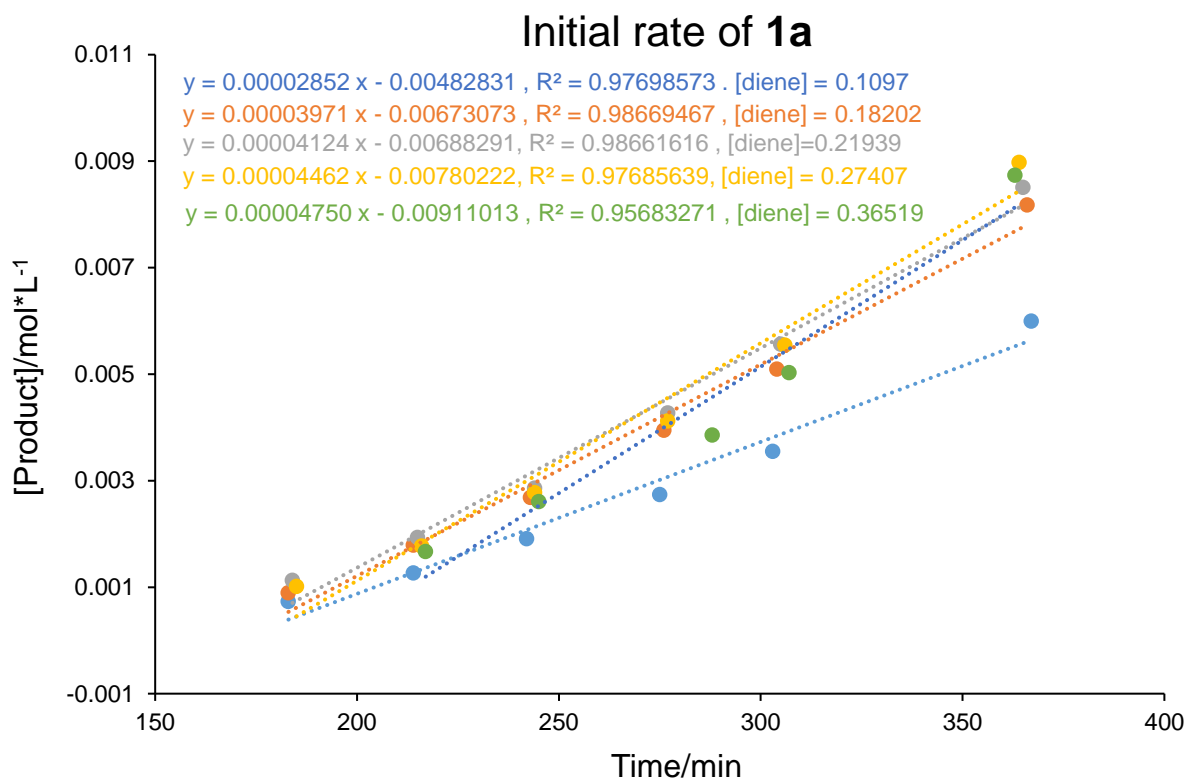

**Supplementary Fig. 54.** Plot of concentration of **3a** over time with reactions performed with varying concentration of **1a**.

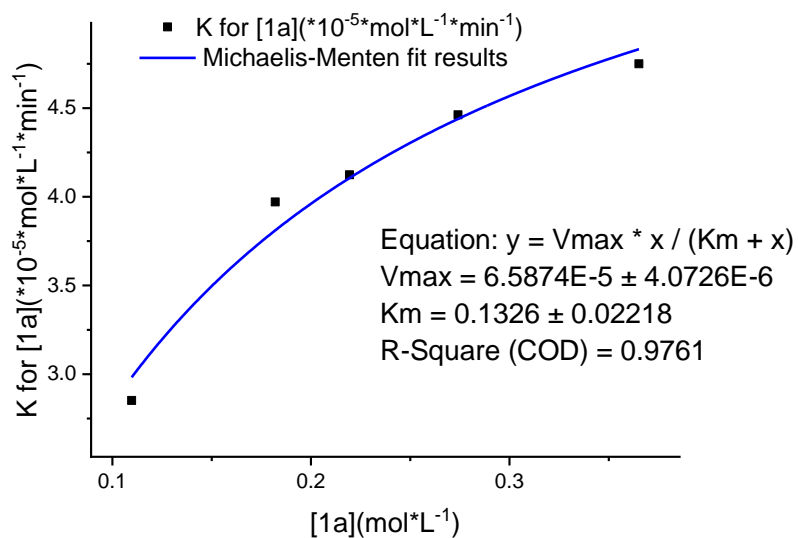

**Supplementary Fig. 55.** Plot of the initial rates of formation of **3a** vs. **[1a]** for the migratory allylation reaction.

Base on the Michaelis-Menten equation, the relationship of  $1/k$  with  $1/[\mathbf{1a}]$  should be linear, consistent with our detected data below:

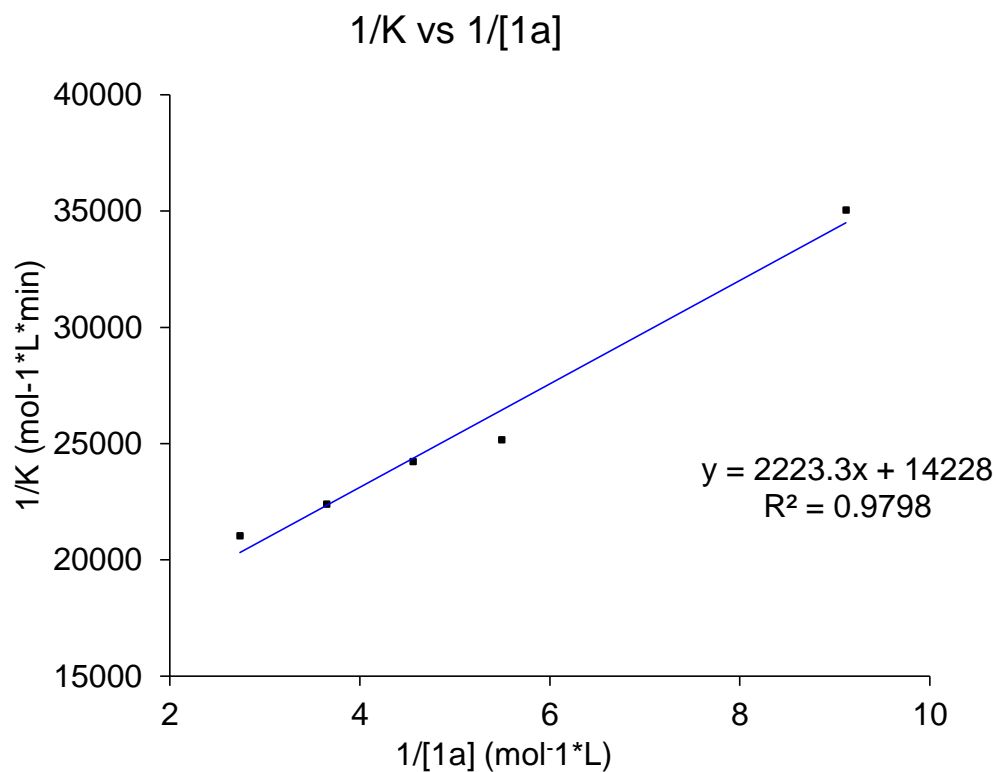

**Supplementary Fig. 56.** Plot of  $[\text{Initial Rates}]^{-1}$  vs.  $[\mathbf{1a}]^{-1}$  for the migratory allylation reaction.

### 7.6 Determination of initial rate equation

If the allylic substitution step was the rate-determining step, then

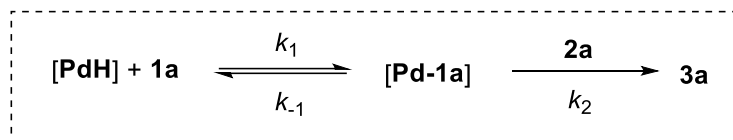

$$\frac{d[\text{Pd} - \mathbf{1a}]}{dt} = k_1[\text{PdH}][\mathbf{1a}] - k_{-1}[\text{Pd} - \mathbf{1a}] - k_2[\text{Pd} - \mathbf{1a}][\mathbf{2a}] = 0$$

Based on the Steady-State Approximation (SSA) theory:

Also 
$$[\text{PdH}] = [\text{cat}] - [\text{Pd} - \mathbf{1a}]$$

So 
$$[\text{Pd} - \mathbf{1a}] = \frac{k_1[\text{cat}][\mathbf{1a}]}{k_1[\mathbf{1a}] + k_{-1}[\mathbf{1a}] + k_{-1}}$$

Finally 
$$\text{initial rate} = \frac{d[\mathbf{3a}]}{dt} = k_2[\text{Pd} - \mathbf{1a}][\mathbf{2a}] = \frac{k_1 k_2 [\text{cat}][\mathbf{1a}][\mathbf{2a}]}{k_1[\mathbf{1a}] + k_2[\mathbf{1a}] + k_{-1}}$$

As 
$$k_2 \ll k_1 \sim k_{-1}$$

So 
$$\text{initial rate} \approx \frac{k_1 k_2 [\text{cat}][\mathbf{1a}][\mathbf{2a}]}{k_1[\mathbf{1a}] + k_{-1}} = K_{\text{obs}}[\text{cat}][\mathbf{2a}] \frac{[\mathbf{1a}]}{k_1[\mathbf{1a}] + k_{-1}}$$

- 1st order on [cat]
- 1st order on [2a]
- saturation kinetics on [1a]

The deduced equation above was perfectly consistent with the kinetic studies. Thus, combining with the KIE data, we proposed the rate-determining step was the allylic substitution.

On the other hand, the observed kinetic data for **1a** with a perfect fitting by Michaelis-Menten kinetic model also demonstrated the above conclusion.

## 7.7 Induction period detection

To a 25 mL Schlenk tube in a N<sub>2</sub> box was added [Pd(allyl)Cl]<sub>2</sub> (4.6 mg, 0.013 mmol), L (14 mg, 0.025 mmol), sodium tetrakis[3,5-bis(trifluoromethyl)phenyl]borate (NaBAr<sup>F</sup><sub>4</sub>, 22 mg, 0.025 mmol) and dry Et<sub>3</sub>N (5 mL). The mixture was then stirred at 25 °C for 5 min. Next, dodecane (38 mg, 0.22 mmol) and skipped diene **1a** (79 mg, 0.50 mmol) were added sequentially. After the mixture was stirred for 1 min,

skipped diene **1a** (79 mg, 0.50 mmol) were added sequentially. After the mixture was stirred for 1 min, nucleophile **2a** was added to the reaction. The reaction was stirred at 60 °C and analyzed by GC along time.

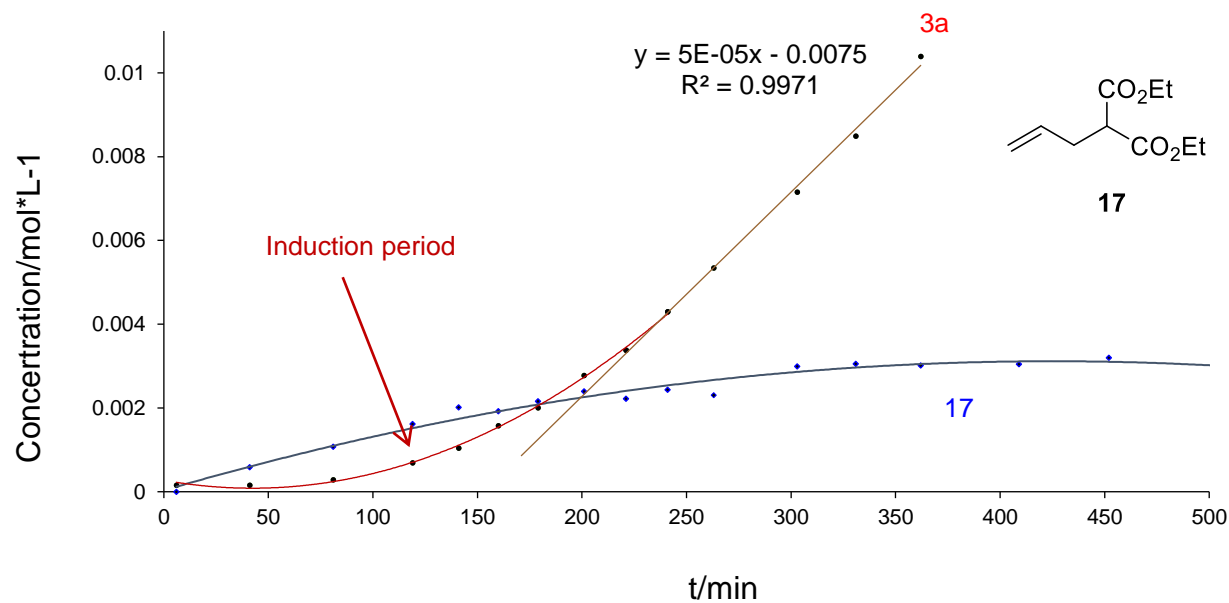

**Supplementary Fig. 57.** Kinetic data for the formation of **3a** and **17**.

**17** generated from the allylic substitution of nucleophile with  $[Pd(allyl)Cl]_2$  is a known compound (ref *J. Am. Chem. Soc.* **2009**, *131*, 8772–8774).



## 8. Regioconvergent synthesis, gram-scale test and transformations of allylation products

### 8.1 Regioconvergent synthesis

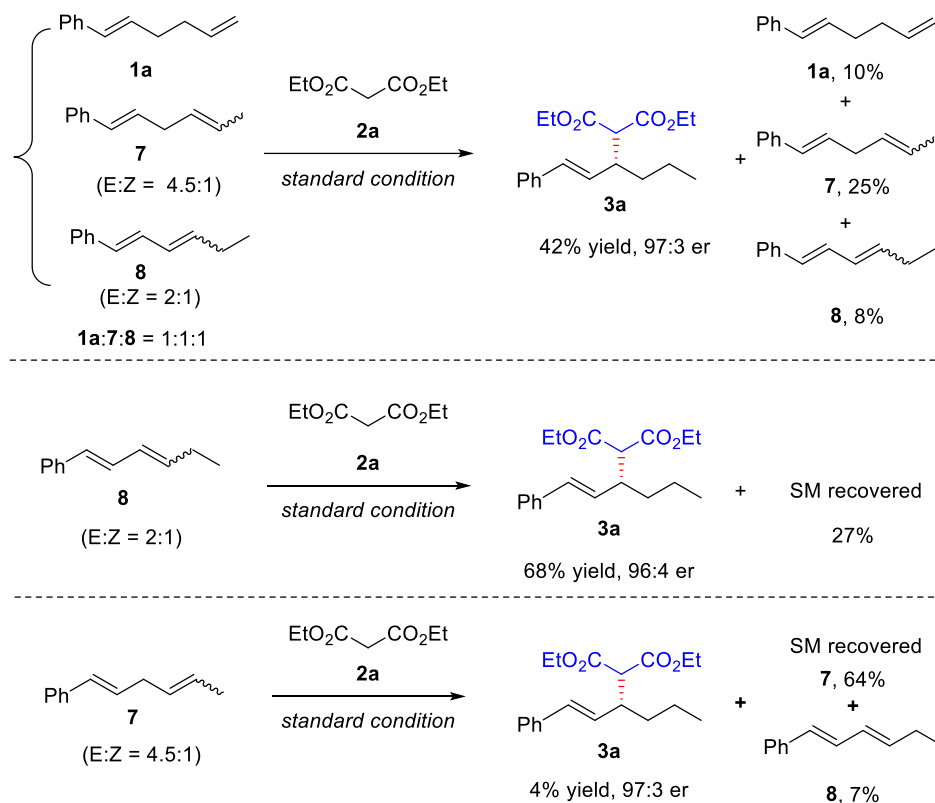

Supplementary Fig. 58. Regioconvergent synthesis.

The procedures of these experiment were similar as that described in part 4 titled “General procedure for Pd-catalyzed migratory allylic functionalization”.

### 8.2 Gram-scale test

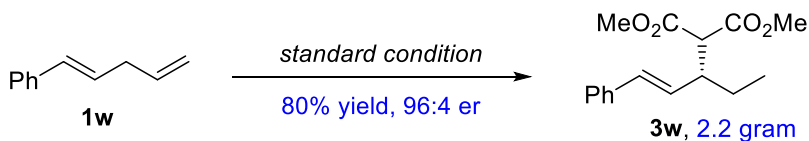

**Procedure for the gram-scale test:** To a 50 mL Schlenk tube in the glovebox under nitrogen were added [Pd(allyl)Cl]<sub>2</sub> (90 mg, 0.25 mmol), **L** (0.28 g, 0.50 mmol), sodium tetrakis[3,5-bis(trifluoromethyl)phenyl]borate (NaBAR<sup>F</sup><sub>4</sub>, 0.44 g, 0.50 mmol) and dry Et<sub>3</sub>N (10 mL). The mixture was stirred at room temperature for 5 min. Then the skipped diene **1** (1.4 g, 10 mmol) was added to the solution and the reaction continued to stir for 1 min. Finally, the nucleophile **2** (1.5 g, 10 mmol) was added to the reaction. The resulting mixture was stirred at 60 °C for 24 h. After this time, the reaction solution was

cooled to room temperature and then condensed. The crude  $^1\text{H}$  NMR was obtained with dibromomethane (0.7 mL, 10 mmol) as internal standard to help determine the regioselectivity and conversion. The reaction was further purified by flash column chromatography to afford the pure allylation product **3w** (2.2 g) as a colorless oil in 80% yield with 96:4 er.

### 8.3 Transformations of allylation products

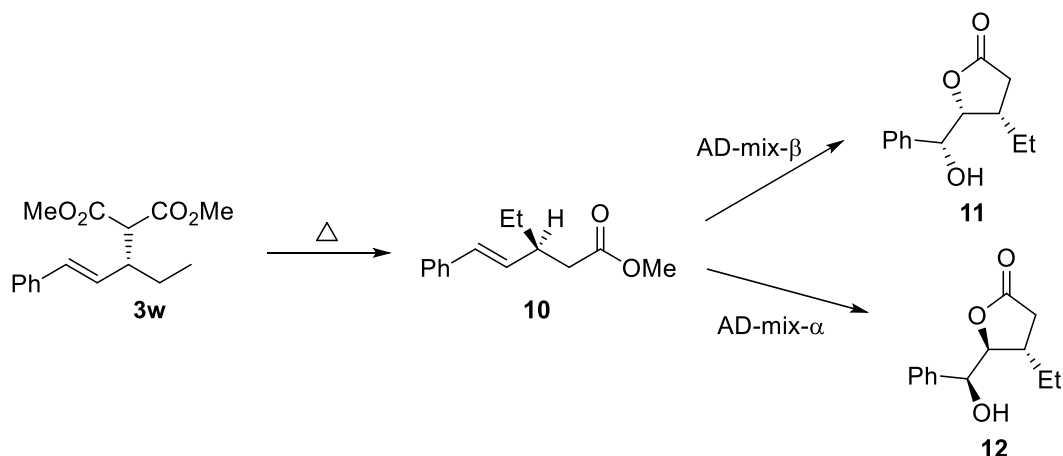

**Methyl (*S,E*)-3-ethyl-5-phenylpent-4-enoate (**10**):** To a 10 mL flask was added **3w** (0.28 g, 1.0 mmol), NaCl (0.17 g, 3.0 mmol), DMSO (1.5 mL) and H<sub>2</sub>O (1.0 mL). The mixture was stirred at 180 °C under reflux for 8 h. After **3w** was fully consumed, the solution was cooled to room temperature, extracted by ethyl acetate (5 mL  $\times$  3), dried by anhydrous NaSO<sub>4</sub>, and purified by flash column chromatography to afford the pure product **10** (0.17 g) as a colorless oil in 76% yield.  $^1\text{H}$  NMR (500 MHz, chloroform-*d*)  $\delta$  7.38 – 7.32 (m, 2H), 7.30 (dd,  $J$  = 8.5, 6.8 Hz, 2H), 7.24 – 7.17 (m, 1H), 6.42 (d,  $J$  = 15.8 Hz, 1H), 6.01 (dd,  $J$  = 15.8, 8.7 Hz, 1H), 3.65 (s, 3H), 2.68 – 2.57 (m, 1H), 2.51 – 2.44 (m, 1H), 2.43 – 2.34 (m, 1H), 1.61 – 1.49 (m, 1H), 1.49 – 1.36 (m, 1H), 0.93 (t,  $J$  = 7.4 Hz, 3H).  $^{13}\text{C}$  NMR (126 MHz, chloroform-*d*)  $\delta$  = 173.0, 137.5, 132.7, 130.6, 128.5, 127.2, 126.2, 51.5, 41.6, 40.0, 27.8, 11.7. HRMS (ESI):  $[\text{M}+\text{H}]^{\oplus}$  calcd for C<sub>14</sub>H<sub>19</sub>O<sub>2</sub><sup>+</sup> 219.1380, found 219.1380.

**(*4S,5R*)-4-Ethyl-5-((*R*)-hydroxy(phenyl)methyl)dihydrofuran-2(*3H*)-one (**11**):** Compound **11** was prepared according to a reported literature<sup>[12]</sup>: To a 25 mL flask was added AD-mix  $\alpha$  (0.78 g, 1.0 mmol), MeSO<sub>2</sub>NH<sub>2</sub> (38 mg, 0.4 mmol) and *t*-BuOH/H<sub>2</sub>O (1 mL/1 mL). **10** (0.87 g, 0.40 mmol) was then added to the reaction. The mixture was allowed to stir vigorously at 25 °C for 16 h. Next, sodium sulfite (0.30 g) was added and the mixture continued to stir at room temperature for 1 h. The reaction was quenched by aqueous KOH (2 M, 2 mL), extracted by EtOAc (5 mL  $\times$  3), dried by anhydrous MgSO<sub>4</sub>, filtered, condensed and purified by flash column chromatography to give **11** (55 mg) in 62% yield as a white solid.  $[\alpha]_{\text{D}}^{25}$  -150.4 ( $c$  0.69, CHCl<sub>3</sub>).  $^1\text{H}$  NMR (500 MHz, Chloroform-*d*)  $\delta$  7.42 – 7.27 (m, 5H), 4.86 (t,  $J$  = 3.2 Hz, 1H), 4.57 (dd,  $J$  = 6.9, 2.8 Hz, 1H), 2.60 – 2.45 (m, 3H), 2.41 (d,  $J$  = 3.8 Hz, 1H), 1.80 – 1.61 (m, 2H), 0.98 (t,  $J$  = 7.4 Hz, 3H).  $^{13}\text{C}$  NMR (126 MHz, CDCl<sub>3</sub>)  $\delta$  = 177.5, 140.3, 128.7, 128.4, 127.0, 84.8, 73.2, 40.4, 34.4, 22.1, 12.7. HRMS (ESI):  $[\text{M}+\text{Na}]^{\oplus}$  calcd for C<sub>13</sub>H<sub>16</sub>O<sub>3</sub>Na<sup>+</sup> 243.0992, found 243.0992.

**(*4S,5R*)-4-Ethyl-5-((*R*)-hydroxy(phenyl)methyl)dihydrofuran-2(*3H*)-one (**12**):** The synthesis of **12** was the same as that for **11**, except that AD-mix  $\beta$  (0.47 g, 0.60 mmol), MeSO<sub>2</sub>NH<sub>2</sub> (19 mg, 0.20 mmol), **10** (44 mg, 0.20 mmol) was used instead. The compound **12** was obtained in 84% yield (37 mg) as a colorless oil.  $[\alpha]_{\text{D}}^{25}$  +58.1 ( $c$  0.38, CHCl<sub>3</sub>).  $^1\text{H}$  NMR (500 MHz, chloroform-*d*)  $\delta$  7.46 – 7.31 (m, 5H), 4.70

(d,  $J = 5.5$  Hz, 1H), 4.29 (t,  $J = 5.6$  Hz, 1H), 2.71 – 2.57 (m, 1H), 2.54 (s, 1H), 2.45 – 2.32 (m, 1H), 2.21 – 2.13 (m, 1H), 1.24 – 1.06 (m, 4H), 0.78 (t,  $J = 7.0$  Hz, 3H).  $^{13}\text{C}$  NMR (126 MHz, chloroform- $d$ )  $\delta = 176.4, 138.8, 128.8, 128.8, 127.1, 88.3, 77.4, 77.1, 76.8, 75.8, 36.3, 35.9, 34.9, 20.3, 13.7$ . HRMS (ESI):  $[\text{M}+\text{Na}]^{\oplus}$  calcd for  $\text{C}_{13}\text{H}_{16}\text{O}_3\text{Na}^{\oplus}$  243.0992, found 243.0992.

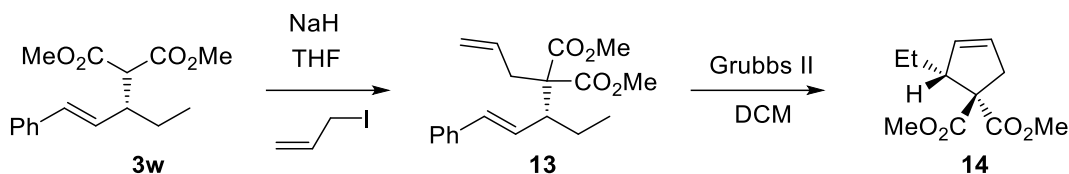

**Dimethyl (*R,E*)-2-allyl-2-(1-phenylpent-1-en-3-yl)malonate (**13**):** To a suspension of NaH (60% wt in mineral oil, 30 mg, 0.75 mmol) in THF (2 mL) at 0 °C under  $\text{N}_2$  was added dimethyl malonate **3w** (0.14 g, 0.50 mmol) in 20 minutes. Then allyl iodide (0.71 g, 2.5 mmol) was added dropwise. The resulting solution was stirred at room temperature overnight. After this time, the reaction was quenched with saturated aqueous  $\text{NH}_4\text{Cl}$  solution (5 mL), extracted with ethyl acetate (5 mL  $\times$  3) and purified by flash column chromatography to give **13** (142 mg) as a colorless oil in 90% yield.  $^1\text{H}$  NMR (500 MHz, chloroform- $d$ )  $\delta$  7.36 (d,  $J = 7.0$  Hz, 2H), 7.30 (t,  $J = 7.5$  Hz, 2H), 7.22 (t,  $J = 7.3$  Hz, 1H), 6.42 (d,  $J = 15.7$  Hz, 1H), 5.93 (dd,  $J = 15.7, 10.2$  Hz, 1H), 5.85 – 5.73 (m, 1H), 5.09 – 5.06 (m, 1H), 5.05 (s, 1H), 3.73 (d,  $J = 3.4$  Hz, 6H), 2.71 – 2.58 (m, 3H), 1.82 – 1.73 (m, 1H), 1.28 – 1.22 (m, 1H), 0.89 (t,  $J = 7.3$  Hz, 3H).  $^{13}\text{C}$  NMR (126 MHz,  $\text{CDCl}_3$ )  $\delta = 171.2, 170.9, 137.2, 133.8, 133.3, 128.58, 128.57, 127.4, 126.4, 118.6, 77.4, 77.1, 76.8, 62.0, 52.1, 52.1, 49.9, 39.2, 24.0, 12.7$ . HRMS (ESI):  $[\text{M}+\text{H}]^{\oplus}$  calcd for  $\text{C}_{19}\text{H}_{24}\text{O}_4$  339.1567, found 339.1567.

**Dimethyl (*R*)-2-ethylcyclopent-3-ene-1,1-dicarboxylate (**14**):** Diene **13** (67 mg, 0.20 mmol) was dissolved in  $\text{CH}_2\text{Cl}_2$  (4 ml) and Grubbs 2nd generation catalyst (9 mg, 0.007 mmol) was added. The mixture was stirred at room temperature for 1 hour. Next, DMSO (0.1 mL) was added and the resulting solution continued to stir for another one hour. After this time, the reaction was condensed and purified by flash column chromatography (hexane: ethyl acetate = 20:1) to afford **14** (27 mg) in 91% as a colorless oil.  $[\alpha]_{\text{D}}^{25} -179.7$  ( $c$  0.15,  $\text{CHCl}_3$ ) for 96:4 er;  $^1\text{H}$  NMR (500 MHz, chloroform- $d$ )  $\delta$  5.78 – 5.72 (m, 1H), 5.67 – 5.61 (m, 1H), 3.72 (s, 3H), 3.71 (s, 3H), 3.44 – 3.38 (m, 1H), 3.27 – 3.21 (m, 1H), 2.78 – 2.70 (m, 1H), 1.50 – 1.42 (m, 1H), 1.20 – 1.09 (m, 1H), 0.94 (t,  $J = 7.4$  Hz, 3H).  $^{13}\text{C}$  NMR (126 MHz, chloroform- $d$ )  $\delta = 172.9, 171.1, 132.3, 127.3, 77.4, 77.1, 76.8, 63.5, 52.8, 52.3, 52.1, 40.1, 24.0, 12.2$ . HRMS (ED):  $[\text{M}]^{\oplus}$  calcd for  $\text{C}_{11}\text{H}_{16}\text{O}_4$  212.1043, found 212.1045. The enantiomeric ratio was determined by chiral GC using CP-ChiraSil-DEX (J&W CP7502) (25 m $\times$ 0.25 mm $\times$ 0.25  $\mu\text{m}$ ) column ( $\text{N}_2$  carrier gas, initial flow: 1.0 ml/min; initial temp. 90 °C, hold 50 min, ramp 10 °C/min to 200 °C, hold 5 min). Retention time: 32.7 min (major), 33.9 min (minor).

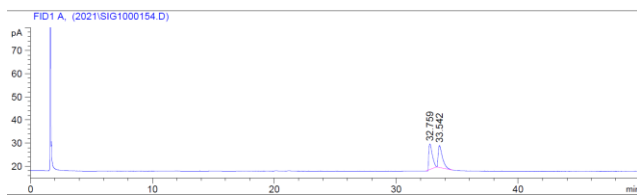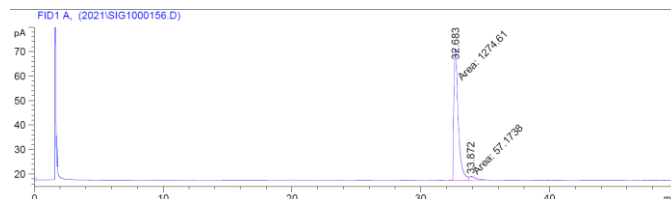

| Peak # | RetTime [min] | Type | Width [min] | Area [pA*s] | Height [pA] | Area %   | Peak # | RetTime [min] | Type | Width [min] | Area [pA*s] | Height [pA] | Area %   |
|--------|---------------|------|-------------|-------------|-------------|----------|--------|---------------|------|-------------|-------------|-------------|----------|
| 1      | 32.759        | BB   | 0.3060      | 220.02219   | 10.97005    | 49.39639 | 1      | 32.683        | MM   | 0.3957      | 1274.61011  | 53.67958    | 95.70698 |
| 2      | 33.542        | BB   | 0.3601      | 225.39941   | 9.38839     | 50.60361 | 2      | 33.872        | MM   | 0.6013      | 57.17379    | 1.58460     | 4.29302  |

Supplementary Fig. 59. HPLC data of compound **14**.

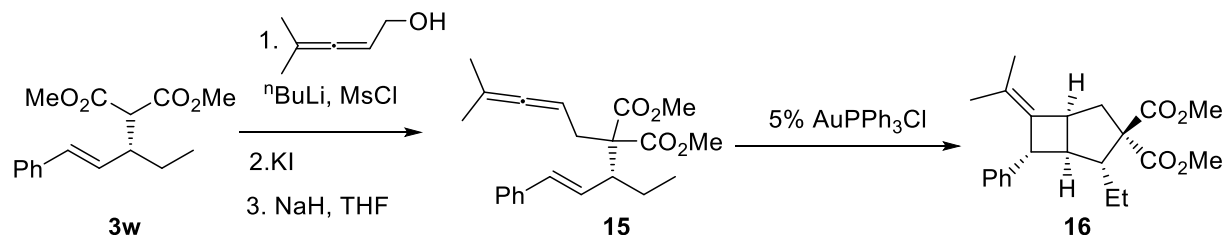

**Dimethyl (R,E)-2-(4-methylpenta-2,3-dien-1-yl)-2-(1-phenylpent-1-en-3-yl)malonate (15):** To a dry 25 mL Schlenk tube charged with a stir bar was added 4-methylpenta-2,3-dien-1-ol (98 mg, 1.0 mmol) and dry THF (5 mL) at  $-78\text{ }^\circ\text{C}$ . Then  $n\text{BuLi}$  (2.5 M in hexane, 0.44 mL) was added dropwise to the reaction above under  $\text{N}_2$  and the resulting mixture continued to stir for 30 min. Then methanesulfonyl chloride (0.11 g, 1.0 mmol) was added and the reaction stirred at  $-78\text{ }^\circ\text{C}$  for another 30 min. Next,  $\text{KI}$  (0.83 g, 5.0 mmol) was added. The mixture was stirred at room temperature for 12 h. Meanwhile, to the second vial with a suspension of  $\text{NaH}$  (60% wt in mineral oil, 22 mg, 0.55 mmol) in THF (5 mL) at  $0\text{ }^\circ\text{C}$  under  $\text{N}_2$  was added **3w** (138 mg, 0.500 mmol) dropwise. After 30 min, the freshly prepared solution of the first vial was added dropwise to the second one. The mixture continued to stir at  $0\text{ }^\circ\text{C}$  for 24 h. The reaction was quenched with sat.  $\text{NH}_4\text{Cl}$  aqueous solution, extracted with ethyl acetate (5 mL  $\times$  3), condensed and purified by flash column chromatography to give **15** (142 mg) as a colorless oil in 80% yield.  $^1\text{H}$  NMR (500 MHz, chloroform- $d$ )  $\delta$  7.38 – 7.27 (m, 5H), 7.25 – 7.18 (m, 1H), 6.43 (d,  $J = 15.7$  Hz, 1H), 5.95 (dd,  $J = 15.8, 10.1$  Hz, 1H), 4.92 (tt,  $J = 7.4, 2.8$  Hz, 1H), 3.73 (d,  $J = 2.4$  Hz, 6H), 2.75 – 2.67 (m, 1H), 2.63 – 2.55 (m, 2H), 1.86 – 1.76 (m, 1H), 1.65 (t,  $J = 2.6$  Hz, 6H), 1.29 – 1.16 (m, 1H), 0.89 (t,  $J = 7.3$  Hz, 3H).  $^{13}\text{C}$  NMR (126 MHz, chloroform- $d$ )  $\delta = 203.6, 171.1, 171.0, 137.3, 133.6, 128.9, 128.6, 127.4, 126.4, 95.0, 83.7, 62.1, 52.2, 52.1, 49.6, 35.0, 23.9, 20.6, 20.6, 12.8$ . HRMS (ESI):  $[\text{M}+\text{H}]^{\oplus}$  calcd for  $\text{C}_{22}\text{H}_{29}\text{O}_4$   $^{\oplus}$  357.2060, found 357.2060.

**Dimethyl (1S,2R,5S,7R)-2-ethyl-7-phenyl-6-(propan-2-ylidene)bicyclo[3.2.0]heptane-3,3-dicarboxylate (16):** To a 4 mL vial was added  $\text{Ph}_3\text{AuCl}$  (2.5 mg, 5.0 mol%),  $\text{AgBF}_4$  (1.0 mg, 5.0 mol%) and dry  $\text{CH}_2\text{Cl}_2$  (1 mL) under nitrogen. The mixture was stirred at room temperature for 5 minutes. Then the solution was transferred to another 4 mL vial with **15** (32 mg, 0.10 mmol) in  $\text{CH}_2\text{Cl}_2$  (1 mL). The reaction was stirred at room temperature and monitored by TLC analysis. The reaction was filtered through a short silica plug and eluted with  $\text{CH}_2\text{Cl}_2$ , condensed and purified by flash column chromatography to obtain **16** as a colorless oil (22 mg) in 72% yield.  $[\alpha]_{\text{D}}^{25} +12.7$  ( $c$  1.1,  $\text{CHCl}_3$ ).  $^1\text{H}$  NMR (400 MHz, chloroform- $d$ )  $\delta$  7.32 – 7.26 (m, 2H), 7.23 – 7.12 (m, 3H), 3.73 (s, 1H), 3.71 (s, 3H), 3.68 (s, 3H), 3.59 (s, 1H), 2.80 – 2.69 (m, 1H), 2.58 (dd,  $J = 13.5, 8.4$  Hz, 1H), 2.32 – 2.21 (m, 2H), 1.59 (s, 3H), 1.31 (d,  $J = 1.6$  Hz, 3H), 1.07 – 0.95 (m, 1H), 0.92 (t,  $J = 7.0$  Hz, 3H), 0.89 – 0.83 (m, 1H).  $^{13}\text{C}$  NMR (126 MHz, chloroform- $d$ )  $\delta = 172.1, 171.5, 144.9, 135.8, 128.6, 128.5, 127.2, 125.8, 66.9, 53.8, 52.4, 52.2, 52.1, 49.8, 43.0, 39.0, 24.7, 19.0, 18.8, 13.1$ . HRMS (ESI):  $[\text{M}+\text{H}]^{\oplus}$  calcd for  $\text{C}_{22}\text{H}_{29}\text{O}_4$   $^{\oplus}$  357.2060, found 357.2060.

## 9. X-ray crystal structure of compound **11**

The X-ray crystallographic data for **11** (CCDC 2076792) have been deposited at the Cambridge Crystallographic Data Center ([www.ccdc.cam.ac.uk/data\\_request/cif](http://www.ccdc.cam.ac.uk/data_request/cif)).

The data was collected by using copper irradiation source for the determination of absolute configuration of **11**.

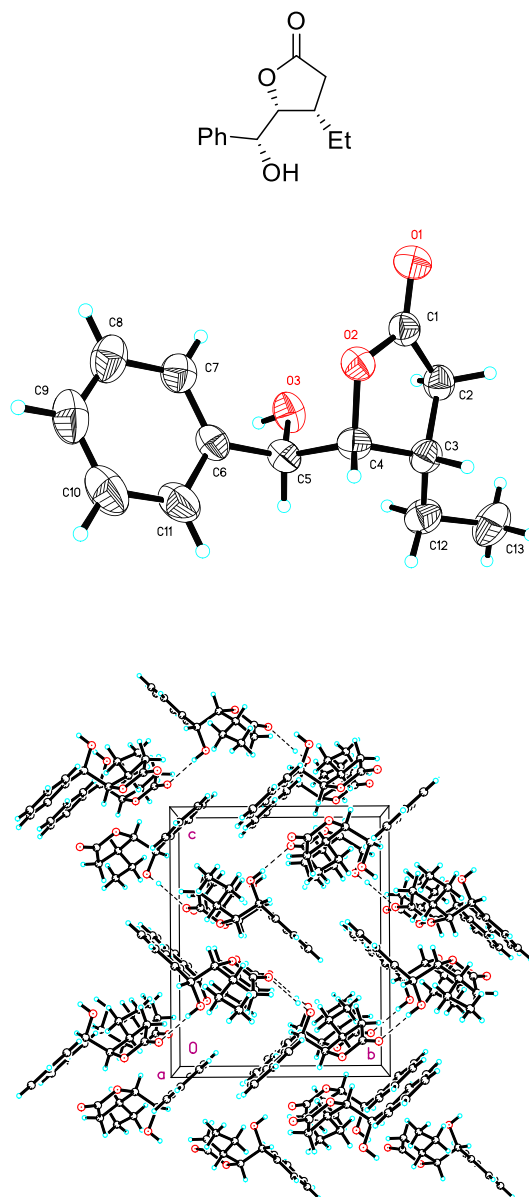

Table 1. Crystal data and structure refinement for **11**.

|                     |                                                |
|---------------------|------------------------------------------------|
| Identification code | <b>11</b>                                      |
| Empirical formula   | C <sub>13</sub> H <sub>16</sub> O <sub>3</sub> |
| Formula weight      | 220.26                                         |

|                                   |                                             |          |
|-----------------------------------|---------------------------------------------|----------|
| Temperature                       | 293(2) K                                    |          |
| Wavelength                        | 1.54178 Å                                   |          |
| Crystal system                    | Orthorhombic                                |          |
| Space group                       | P 21 21 21                                  |          |
| Unit cell dimensions              | a = 7.9175(2) Å                             | a = 90°. |
|                                   | b = 11.1634(2) Å                            | b = 90°. |
|                                   | c = 13.7663(3) Å                            | g = 90°. |
| Volume                            | 1216.75(5) Å <sup>3</sup>                   |          |
| Z                                 | 4                                           |          |
| Density (calculated)              | 1.202 Mg/m <sup>3</sup>                     |          |
| Absorption coefficient            | 0.687 mm <sup>-1</sup>                      |          |
| F(000)                            | 472                                         |          |
| Crystal size                      | 0.200 x 0.150 x 0.120 mm <sup>3</sup>       |          |
| Theta range for data collection   | 7.561 to 70.113°.                           |          |
| Index ranges                      | -8<=h<=9, -13<=k<=12, -14<=l<=16            |          |
| Reflections collected             | 7620                                        |          |
| Independent reflections           | 2245 [R(int) = 0.0305]                      |          |
| Completeness to theta = 67.679°   | 96.8 %                                      |          |
| Absorption correction             | Semi-empirical from equivalents             |          |
| Max. and min. transmission        | 0.7533 and 0.5542                           |          |
| Refinement method                 | Full-matrix least-squares on F <sup>2</sup> |          |
| Data / restraints / parameters    | 2245 / 0 / 147                              |          |
| Goodness-of-fit on F <sup>2</sup> | 1.066                                       |          |
| Final R indices [I>2sigma(I)]     | R1 = 0.0463, wR2 = 0.1253                   |          |
| R indices (all data)              | R1 = 0.0476, wR2 = 0.1274                   |          |
| Absolute structure parameter      | -0.11(9)                                    |          |
| Extinction coefficient            | n/a                                         |          |
| Largest diff. peak and hole       | 0.133 and -0.101 e.Å <sup>-3</sup>          |          |

Table 2. Atomic coordinates ( $\times 10^4$ ) and equivalent isotropic displacement parameters ( $\text{\AA}^2 \times 10^3$ ) for **11**.  $U(\text{eq})$  is defined as one third of the trace of the orthogonalized  $U_{ij}$  tensor.

|       | x        | y       | z       | $U(\text{eq})$ |
|-------|----------|---------|---------|----------------|
| O(1)  | 4480(2)  | 535(2)  | 6319(2) | 79(1)          |
| O(2)  | 5627(2)  | 2174(1) | 5709(1) | 61(1)          |
| O(3)  | 5902(3)  | 3618(2) | 7350(1) | 78(1)          |
| C(1)  | 5635(3)  | 1232(2) | 6313(2) | 62(1)          |
| C(2)  | 7228(3)  | 1213(2) | 6897(2) | 66(1)          |
| C(3)  | 8374(3)  | 2089(2) | 6361(2) | 63(1)          |
| C(4)  | 7096(3)  | 2927(2) | 5871(2) | 59(1)          |
| C(5)  | 6561(3)  | 4026(2) | 6449(2) | 64(1)          |
| C(6)  | 5309(3)  | 4794(2) | 5887(2) | 65(1)          |
| C(7)  | 3592(4)  | 4631(3) | 5988(2) | 75(1)          |
| C(8)  | 2472(4)  | 5329(3) | 5463(2) | 90(1)          |
| C(9)  | 3053(6)  | 6186(3) | 4832(3) | 101(1)         |
| C(10) | 4766(7)  | 6343(3) | 4716(3) | 108(1)         |
| C(11) | 5909(5)  | 5654(3) | 5240(2) | 91(1)          |
| C(12) | 9734(4)  | 2690(3) | 6970(2) | 81(1)          |
| C(13) | 10983(4) | 1789(4) | 7383(3) | 105(1)         |

Table 3. Bond lengths [ $\text{\AA}$ ] and angles [ $^\circ$ ] for **11**.

|                 |            |
|-----------------|------------|
| O(1)-C(1)       | 1.201(3)   |
| O(2)-C(1)       | 1.340(3)   |
| O(2)-C(4)       | 1.452(3)   |
| O(3)-C(5)       | 1.420(3)   |
| O(3)-H(3)       | 0.8200     |
| C(1)-C(2)       | 1.496(3)   |
| C(2)-C(3)       | 1.525(3)   |
| C(2)-H(2A)      | 0.9700     |
| C(2)-H(2B)      | 0.9700     |
| C(3)-C(12)      | 1.520(4)   |
| C(3)-C(4)       | 1.535(3)   |
| C(3)-H(3A)      | 0.9800     |
| C(4)-C(5)       | 1.523(3)   |
| C(4)-H(4)       | 0.9800     |
| C(5)-C(6)       | 1.522(3)   |
| C(5)-H(5)       | 0.9800     |
| C(6)-C(7)       | 1.379(4)   |
| C(6)-C(11)      | 1.392(4)   |
| C(7)-C(8)       | 1.384(4)   |
| C(7)-H(7)       | 0.9300     |
| C(8)-C(9)       | 1.371(5)   |
| C(8)-H(8)       | 0.9300     |
| C(9)-C(10)      | 1.377(7)   |
| C(9)-H(9)       | 0.9300     |
| C(10)-C(11)     | 1.390(5)   |
| C(10)-H(10)     | 0.9300     |
| C(11)-H(11)     | 0.9300     |
| C(12)-C(13)     | 1.521(4)   |
| C(12)-H(12A)    | 0.9700     |
| C(12)-H(12B)    | 0.9700     |
| C(13)-H(13A)    | 0.9600     |
| C(13)-H(13B)    | 0.9600     |
| C(13)-H(13C)    | 0.9600     |
|                 |            |
| C(1)-O(2)-C(4)  | 110.79(17) |
| C(5)-O(3)-H(3)  | 109.5      |
| O(1)-C(1)-O(2)  | 120.6(2)   |
| O(1)-C(1)-C(2)  | 128.9(2)   |
| O(2)-C(1)-C(2)  | 110.43(19) |
| C(1)-C(2)-C(3)  | 103.43(18) |
| C(1)-C(2)-H(2A) | 111.1      |
| C(3)-C(2)-H(2A) | 111.1      |
| C(1)-C(2)-H(2B) | 111.1      |



|                     |            |
|---------------------|------------|
| C(3)-C(2)-H(2B)     | 111.1      |
| H(2A)-C(2)-H(2B)    | 109.0      |
| C(12)-C(3)-C(2)     | 115.9(2)   |
| C(12)-C(3)-C(4)     | 116.1(2)   |
| C(2)-C(3)-C(4)      | 102.19(17) |
| C(12)-C(3)-H(3A)    | 107.3      |
| C(2)-C(3)-H(3A)     | 107.3      |
| C(4)-C(3)-H(3A)     | 107.3      |
| O(2)-C(4)-C(5)      | 108.92(18) |
| O(2)-C(4)-C(3)      | 104.04(17) |
| C(5)-C(4)-C(3)      | 116.40(18) |
| O(2)-C(4)-H(4)      | 109.1      |
| C(5)-C(4)-H(4)      | 109.1      |
| C(3)-C(4)-H(4)      | 109.1      |
| O(3)-C(5)-C(6)      | 112.7(2)   |
| O(3)-C(5)-C(4)      | 107.48(18) |
| C(6)-C(5)-C(4)      | 111.66(18) |
| O(3)-C(5)-H(5)      | 108.3      |
| C(6)-C(5)-H(5)      | 108.3      |
| C(4)-C(5)-H(5)      | 108.3      |
| C(7)-C(6)-C(11)     | 119.5(3)   |
| C(7)-C(6)-C(5)      | 121.1(2)   |
| C(11)-C(6)-C(5)     | 119.4(2)   |
| C(6)-C(7)-C(8)      | 120.3(3)   |
| C(6)-C(7)-H(7)      | 119.8      |
| C(8)-C(7)-H(7)      | 119.8      |
| C(9)-C(8)-C(7)      | 120.5(3)   |
| C(9)-C(8)-H(8)      | 119.7      |
| C(7)-C(8)-H(8)      | 119.7      |
| C(8)-C(9)-C(10)     | 119.5(3)   |
| C(8)-C(9)-H(9)      | 120.2      |
| C(10)-C(9)-H(9)     | 120.2      |
| C(9)-C(10)-C(11)    | 120.7(4)   |
| C(9)-C(10)-H(10)    | 119.7      |
| C(11)-C(10)-H(10)   | 119.7      |
| C(10)-C(11)-C(6)    | 119.5(3)   |
| C(10)-C(11)-H(11)   | 120.3      |
| C(6)-C(11)-H(11)    | 120.3      |
| C(3)-C(12)-C(13)    | 112.0(3)   |
| C(3)-C(12)-H(12A)   | 109.2      |
| C(13)-C(12)-H(12A)  | 109.2      |
| C(3)-C(12)-H(12B)   | 109.2      |
| C(13)-C(12)-H(12B)  | 109.2      |
| H(12A)-C(12)-H(12B) | 107.9      |
| C(12)-C(13)-H(13A)  | 109.5      |

|                     |       |
|---------------------|-------|
| C(12)-C(13)-H(13B)  | 109.5 |
| H(13A)-C(13)-H(13B) | 109.5 |
| C(12)-C(13)-H(13C)  | 109.5 |
| H(13A)-C(13)-H(13C) | 109.5 |
| H(13B)-C(13)-H(13C) | 109.5 |

---

Symmetry transformations used to generate equivalent atoms:

Table 4. Anisotropic displacement parameters ( $\text{\AA}^2 \times 10^3$ ) for **11**. The anisotropic displacement factor exponent takes the form:  $-2p^2[h^2 a^*2U^{11} + \dots + 2hk a^* b^* U^{12}]$

|       | U <sup>11</sup> | U <sup>22</sup> | U <sup>33</sup> | U <sup>23</sup> | U <sup>13</sup> | U <sup>12</sup> |
|-------|-----------------|-----------------|-----------------|-----------------|-----------------|-----------------|
| O(1)  | 74(1)           | 71(1)           | 92(1)           | 7(1)            | 8(1)            | -10(1)          |
| O(2)  | 65(1)           | 58(1)           | 59(1)           | 0(1)            | -4(1)           | -1(1)           |
| O(3)  | 110(1)          | 66(1)           | 57(1)           | -3(1)           | 5(1)            | 13(1)           |
| C(1)  | 66(1)           | 57(1)           | 63(1)           | 0(1)            | 6(1)            | 4(1)            |
| C(2)  | 74(1)           | 63(1)           | 62(1)           | 6(1)            | 3(1)            | 7(1)            |
| C(3)  | 63(1)           | 70(1)           | 58(1)           | 0(1)            | 5(1)            | 5(1)            |
| C(4)  | 62(1)           | 63(1)           | 53(1)           | 4(1)            | 2(1)            | -4(1)           |
| C(5)  | 75(1)           | 57(1)           | 61(1)           | 2(1)            | -6(1)           | -5(1)           |
| C(6)  | 81(1)           | 51(1)           | 64(1)           | -4(1)           | -6(1)           | -3(1)           |
| C(7)  | 82(2)           | 73(1)           | 69(1)           | -10(1)          | -1(1)           | 5(1)            |
| C(8)  | 93(2)           | 95(2)           | 84(2)           | -22(2)          | -15(2)          | 26(2)           |
| C(9)  | 128(3)          | 80(2)           | 95(2)           | -7(2)           | -34(2)          | 29(2)           |
| C(10) | 148(4)          | 75(2)           | 102(2)          | 25(2)           | -20(2)          | -4(2)           |
| C(11) | 107(2)          | 72(2)           | 95(2)           | 22(1)           | -15(2)          | -15(2)          |
| C(12) | 68(1)           | 95(2)           | 81(2)           | 3(1)            | -10(1)          | -1(1)           |
| C(13) | 76(2)           | 140(3)          | 100(2)          | -8(2)           | -18(2)          | 27(2)           |

Table 5. Hydrogen coordinates ( $\times 10^4$ ) and isotropic displacement parameters ( $\text{\AA}^2 \times 10^{-3}$ ) for **11**.

|        | x     | y    | z    | U(eq) |
|--------|-------|------|------|-------|
| H(3)   | 5753  | 4192 | 7712 | 116   |
| H(2A)  | 7717  | 417  | 6910 | 79    |
| H(2B)  | 7023  | 1476 | 7559 | 79    |
| H(3A)  | 8947  | 1640 | 5845 | 76    |
| H(4)   | 7548  | 3185 | 5242 | 71    |
| H(5)   | 7568  | 4510 | 6581 | 77    |
| H(7)   | 3184  | 4050 | 6411 | 90    |
| H(8)   | 1315  | 5215 | 5538 | 108   |
| H(9)   | 2296  | 6658 | 4486 | 121   |
| H(10)  | 5163  | 6916 | 4282 | 130   |
| H(11)  | 7064  | 5766 | 5160 | 109   |
| H(12A) | 9205  | 3123 | 7500 | 97    |
| H(12B) | 10337 | 3265 | 6572 | 97    |
| H(13A) | 11499 | 1351 | 6862 | 158   |
| H(13B) | 10400 | 1243 | 7805 | 158   |
| H(13C) | 11839 | 2205 | 7745 | 158   |

Table 6. Torsion angles [°] for **11**.

|                       |            |
|-----------------------|------------|
| C(4)-O(2)-C(1)-O(1)   | 176.6(2)   |
| C(4)-O(2)-C(1)-C(2)   | -4.8(2)    |
| O(1)-C(1)-C(2)-C(3)   | 163.8(2)   |
| O(2)-C(1)-C(2)-C(3)   | -14.7(2)   |
| C(1)-C(2)-C(3)-C(12)  | 153.9(2)   |
| C(1)-C(2)-C(3)-C(4)   | 26.6(2)    |
| C(1)-O(2)-C(4)-C(5)   | -102.6(2)  |
| C(1)-O(2)-C(4)-C(3)   | 22.1(2)    |
| C(12)-C(3)-C(4)-O(2)  | -156.8(2)  |
| C(2)-C(3)-C(4)-O(2)   | -29.6(2)   |
| C(12)-C(3)-C(4)-C(5)  | -36.9(3)   |
| C(2)-C(3)-C(4)-C(5)   | 90.3(2)    |
| O(2)-C(4)-C(5)-O(3)   | 60.6(2)    |
| C(3)-C(4)-C(5)-O(3)   | -56.5(3)   |
| O(2)-C(4)-C(5)-C(6)   | -63.5(2)   |
| C(3)-C(4)-C(5)-C(6)   | 179.37(19) |
| O(3)-C(5)-C(6)-C(7)   | -28.9(3)   |
| C(4)-C(5)-C(6)-C(7)   | 92.2(3)    |
| O(3)-C(5)-C(6)-C(11)  | 152.8(2)   |
| C(4)-C(5)-C(6)-C(11)  | -86.1(3)   |
| C(11)-C(6)-C(7)-C(8)  | -1.0(4)    |
| C(5)-C(6)-C(7)-C(8)   | -179.3(2)  |
| C(6)-C(7)-C(8)-C(9)   | 0.3(4)     |
| C(7)-C(8)-C(9)-C(10)  | 0.7(5)     |
| C(8)-C(9)-C(10)-C(11) | -0.9(6)    |
| C(9)-C(10)-C(11)-C(6) | 0.2(6)     |
| C(7)-C(6)-C(11)-C(10) | 0.8(5)     |
| C(5)-C(6)-C(11)-C(10) | 179.0(3)   |
| C(2)-C(3)-C(12)-C(13) | 62.7(3)    |
| C(4)-C(3)-C(12)-C(13) | -177.3(3)  |

Symmetry transformations used to generate equivalent atoms:

Table 7. Hydrogen bonds for **11** [Å and °].

| D-H...A            | d(D-H) | d(H...A) | d(D...A) | <(DHA) |
|--------------------|--------|----------|----------|--------|
| O(3)-H(3)...O(1)#1 | 0.82   | 2.02     | 2.833(3) | 175.2  |
| O(3)-H(3)...O(1)#1 | 0.82   | 2.02     | 2.833(3) | 175.2  |

Symmetry transformations used to generate equivalent atoms:

#1 -x+1,y+1/2,-z+3/2

**10. Copies of  $^1\text{H}$  NMR,  $^{13}\text{C}$  NMR and  $^{19}\text{F}$  NMR spectra**

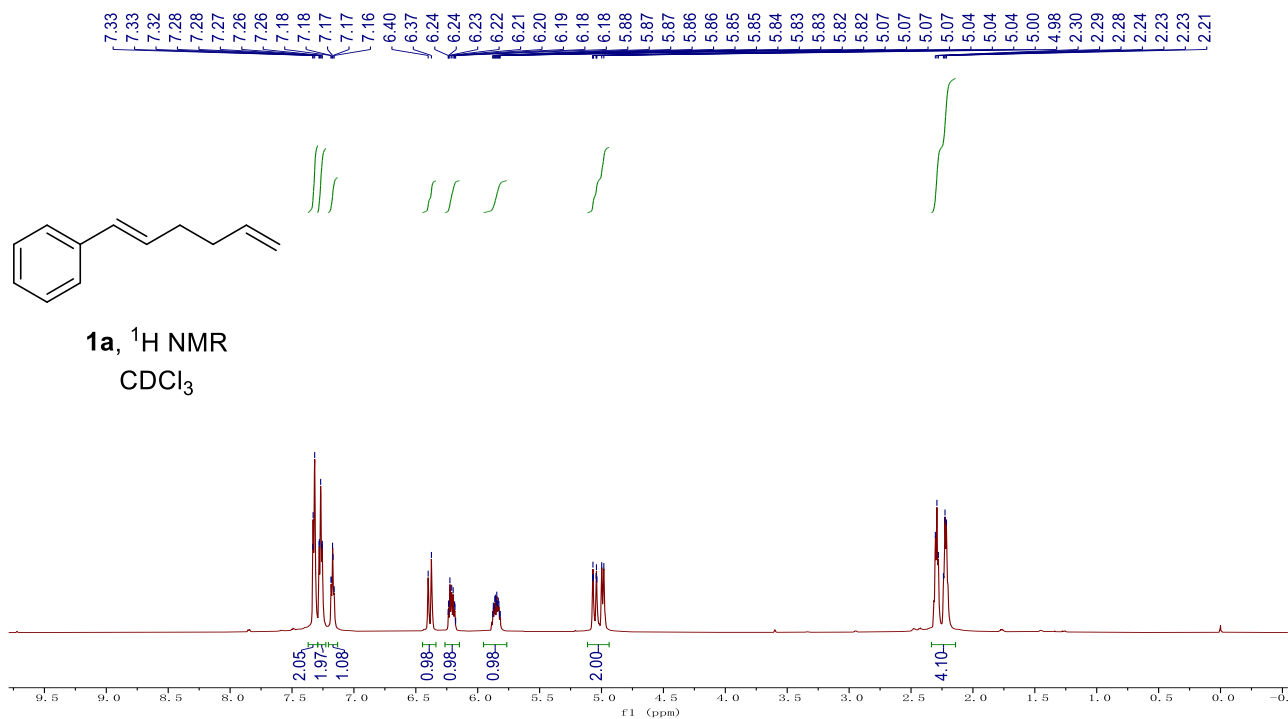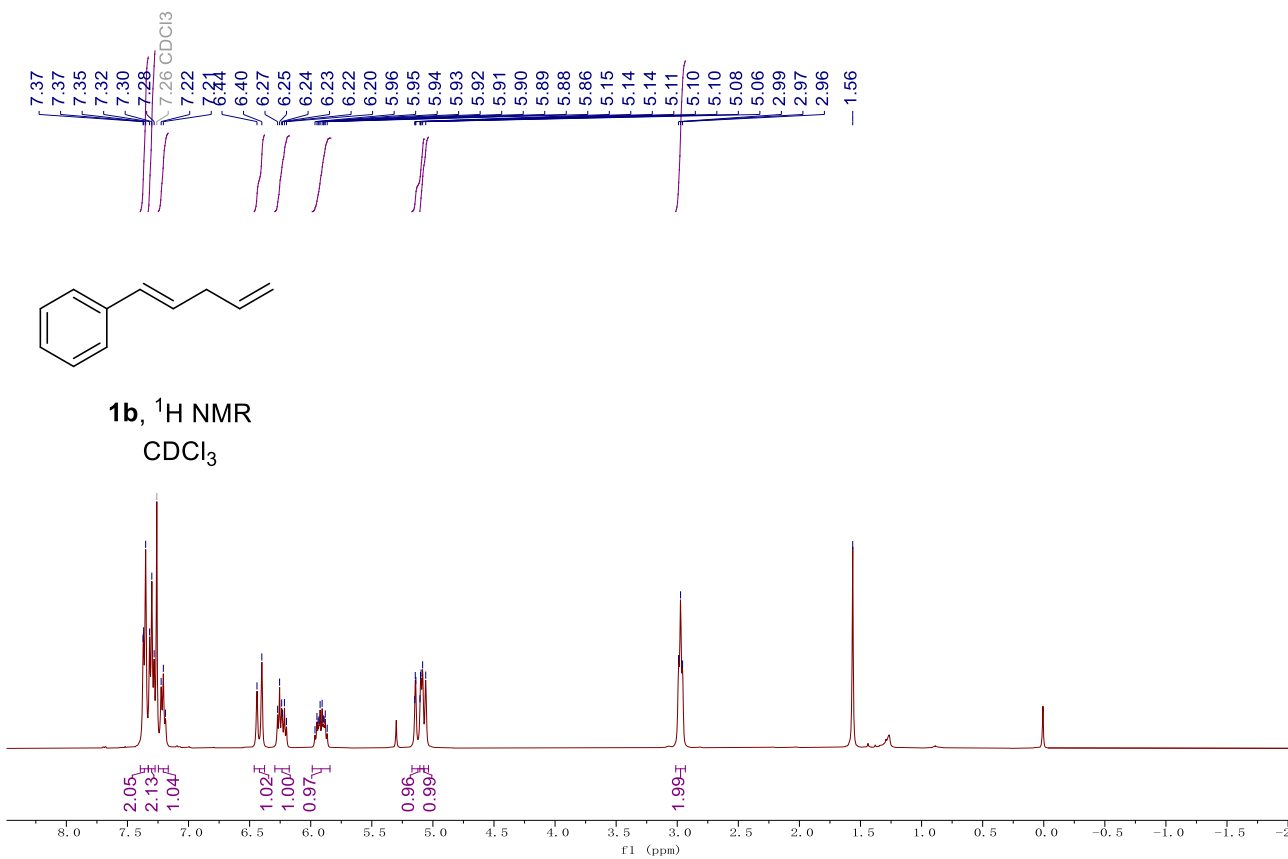

**Supplementary Fig. 60.**  $^1\text{H}$  NMR spectra of compound **1a** and **1b**.



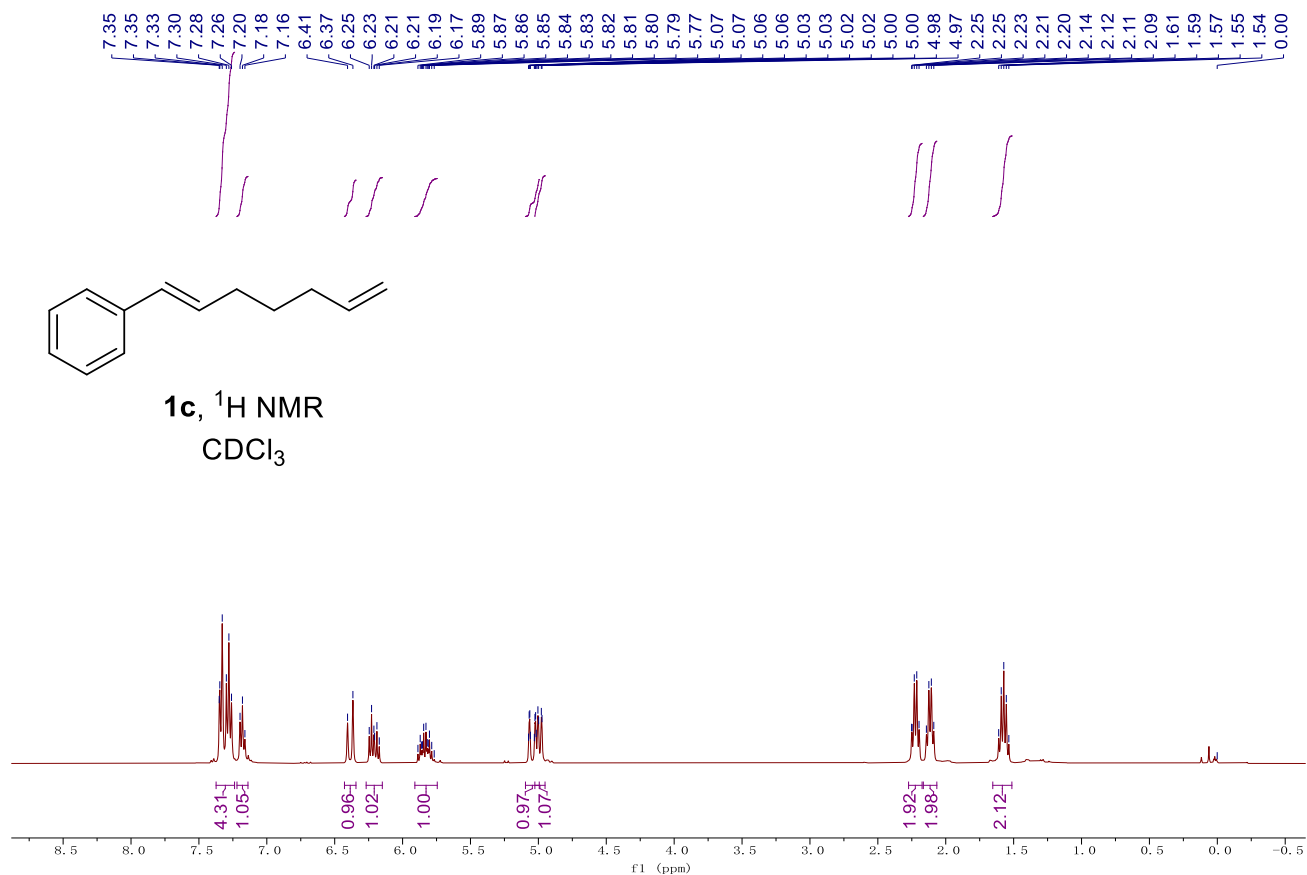

**Supplementary Fig. 61.**  $^1\text{H NMR}$  spectra of compound **1c**.

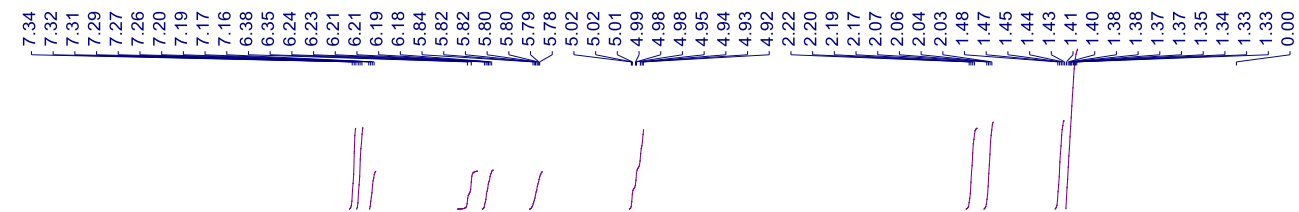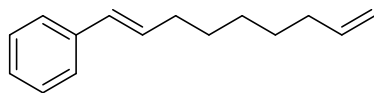

**1d**,  $^1\text{H}$  NMR  
 $\text{CDCl}_3$

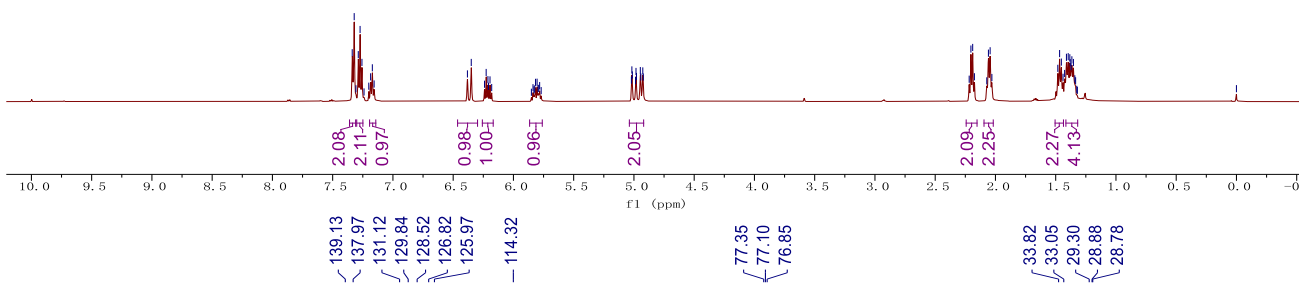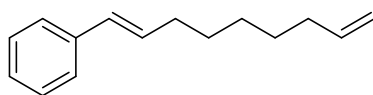

**1d**,  $^{13}\text{C}$  NMR  
 $\text{CDCl}_3$

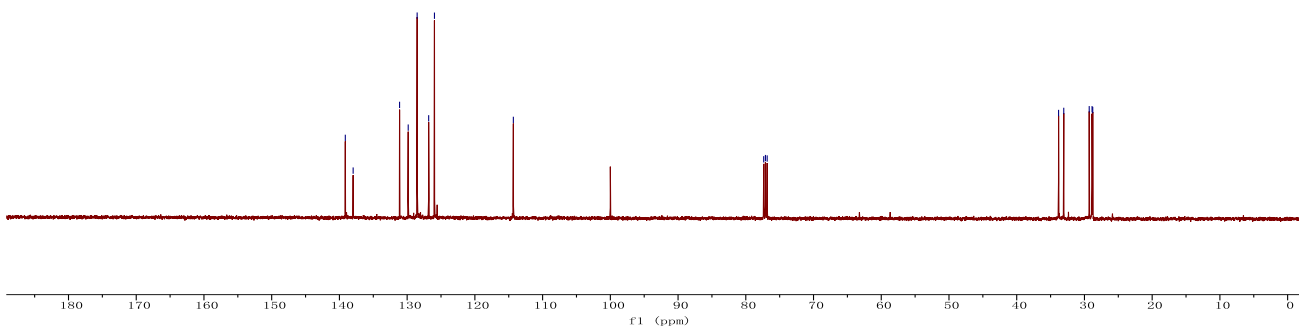

**Supplementary Fig. 62.**  $^1\text{H}$  NMR and  $^{13}\text{C}$  NMR spectra of compound **1d**.

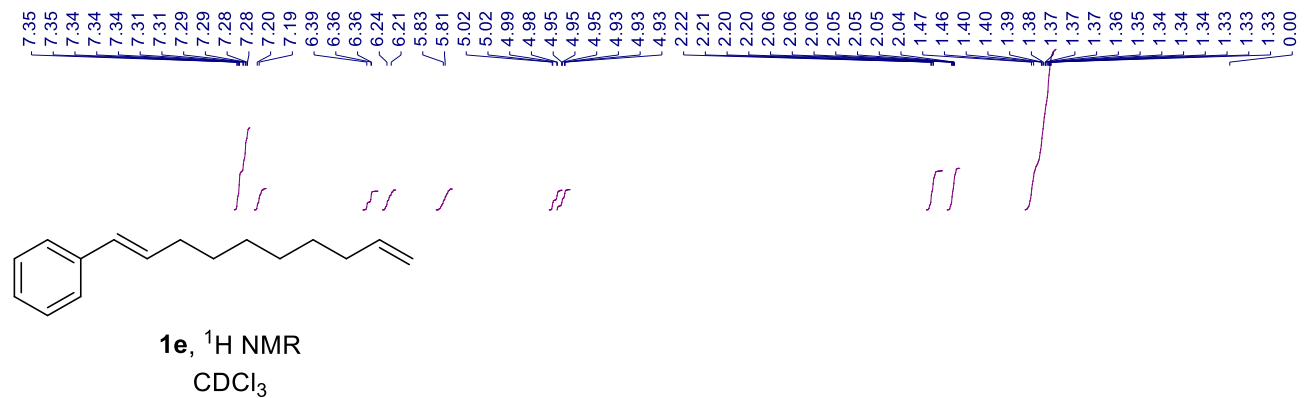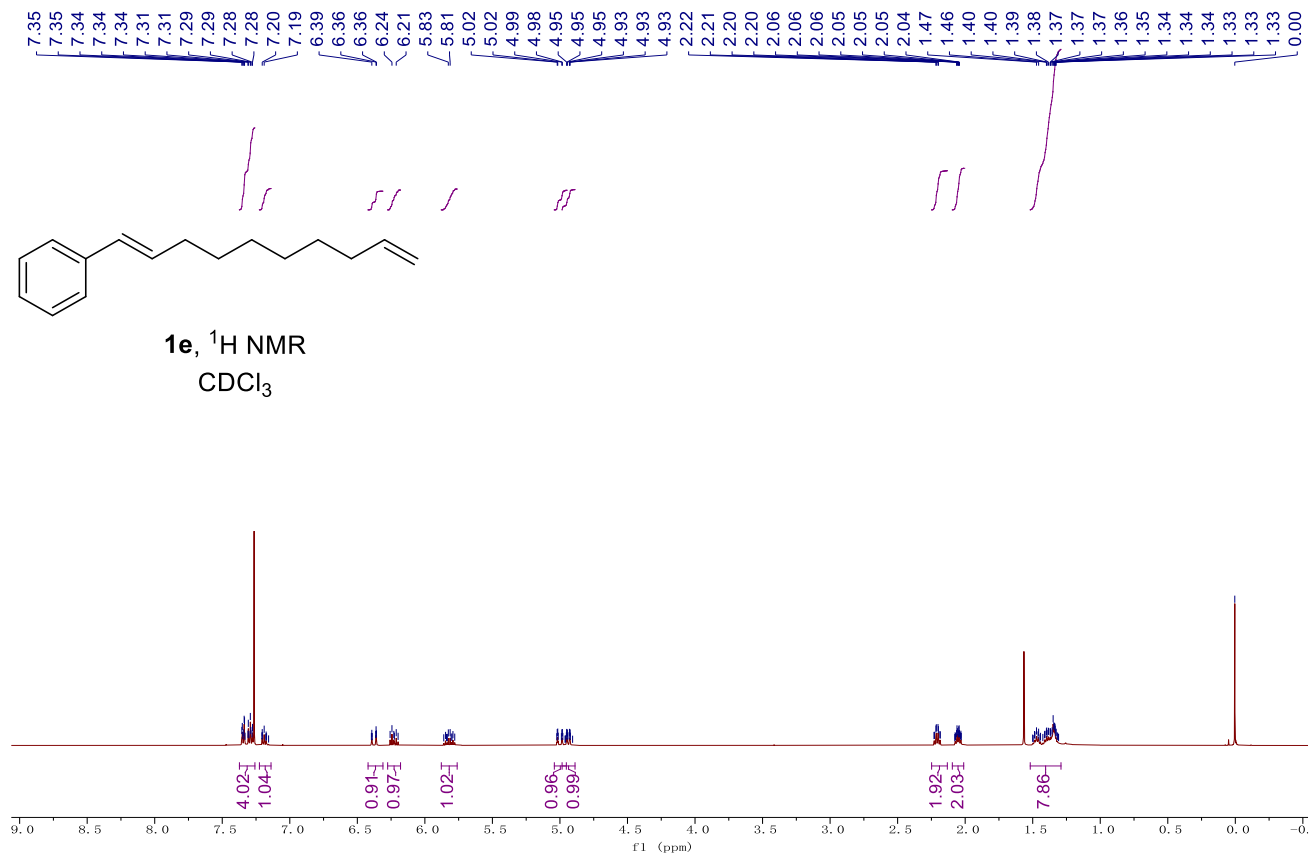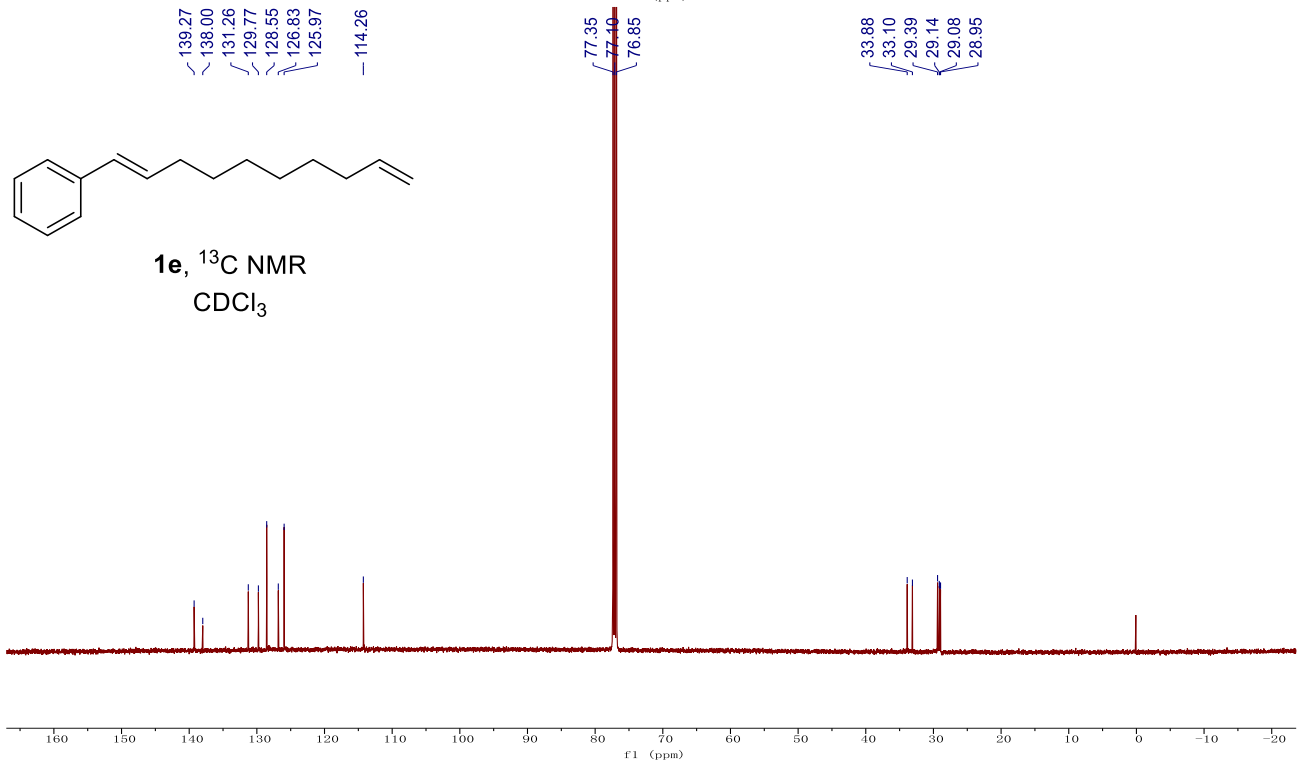

**Supplementary Fig. 63.**  $^1\text{H NMR}$  and  $^{13}\text{C NMR}$  spectra of compound **1e**.

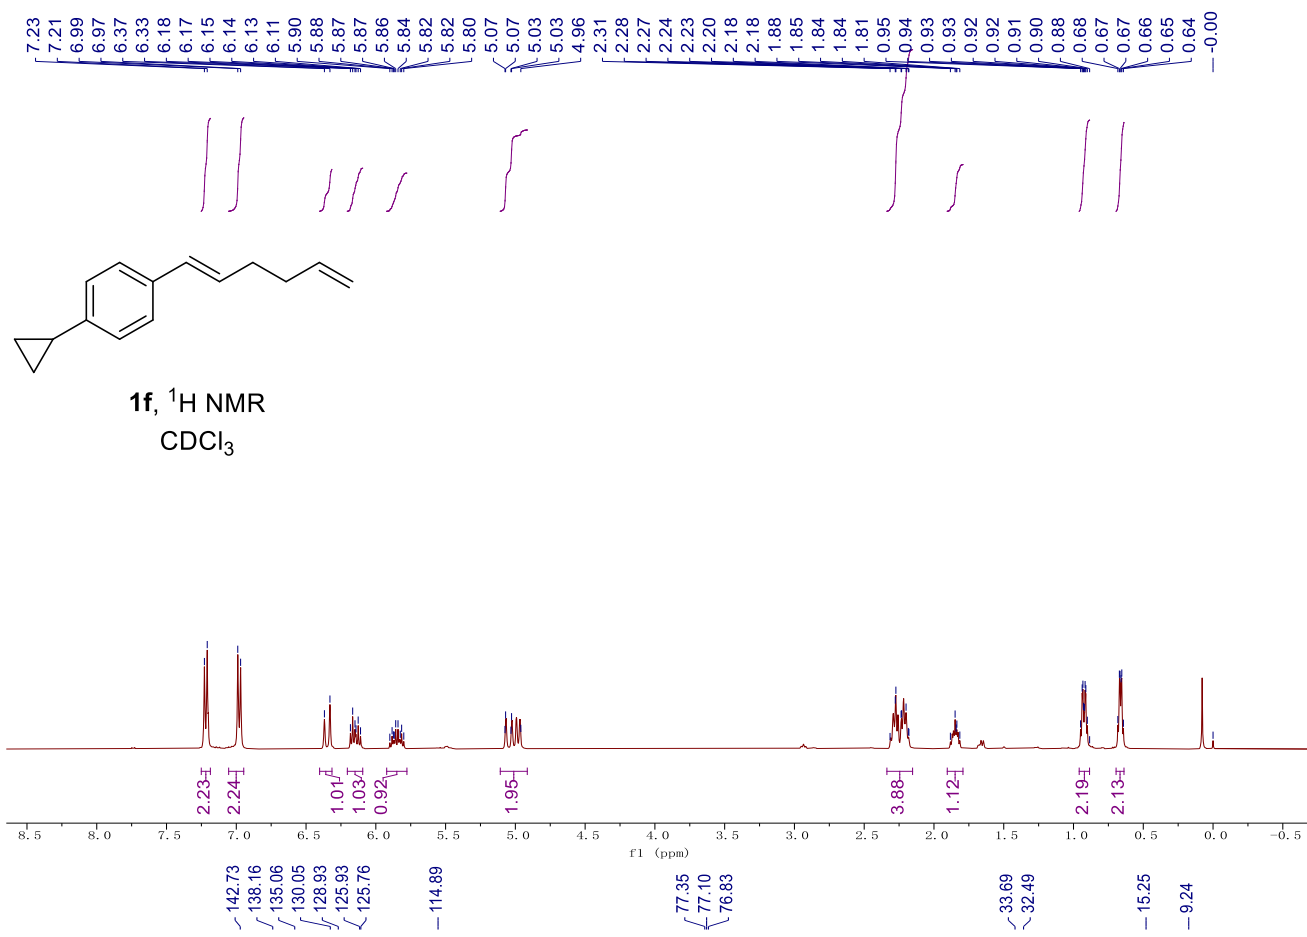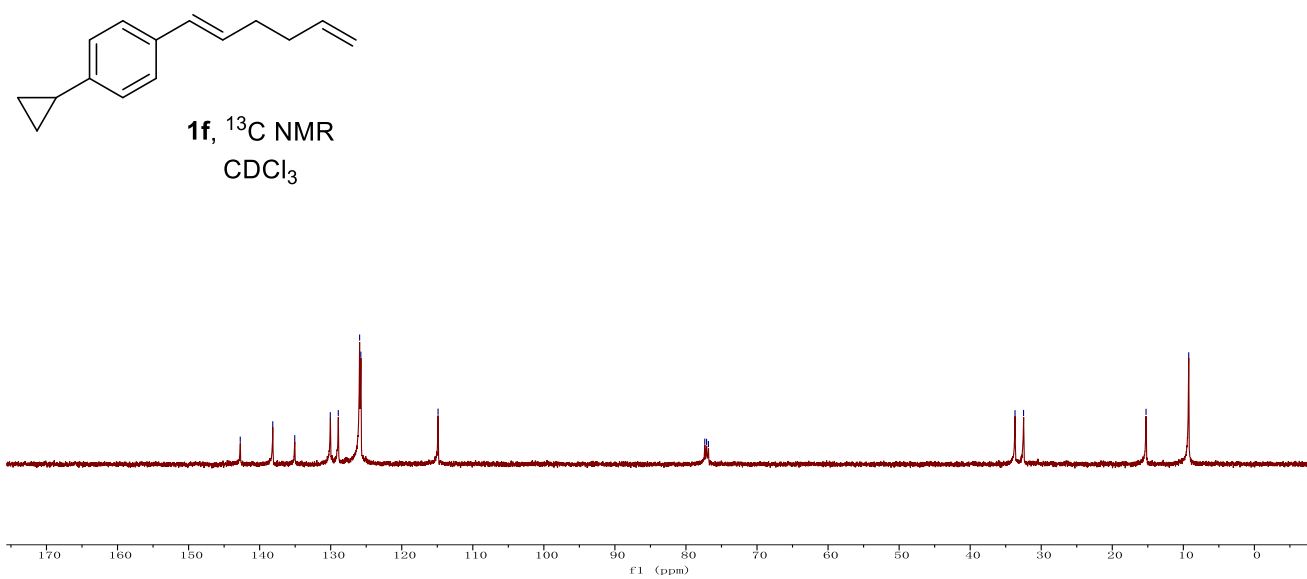

Supplementary Fig. 64.  $^1\text{H}$  NMR and  $^{13}\text{C}$  NMR spectra of compound **1f**.

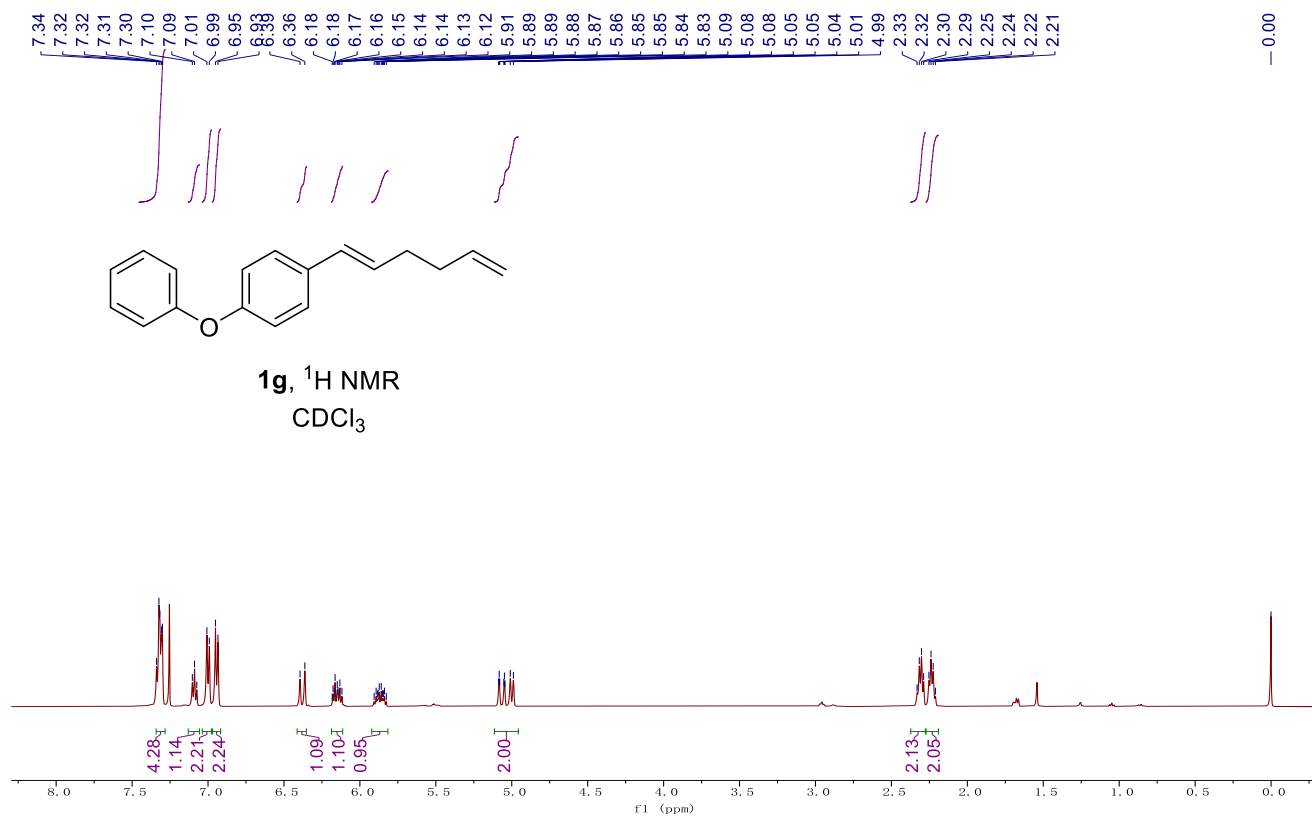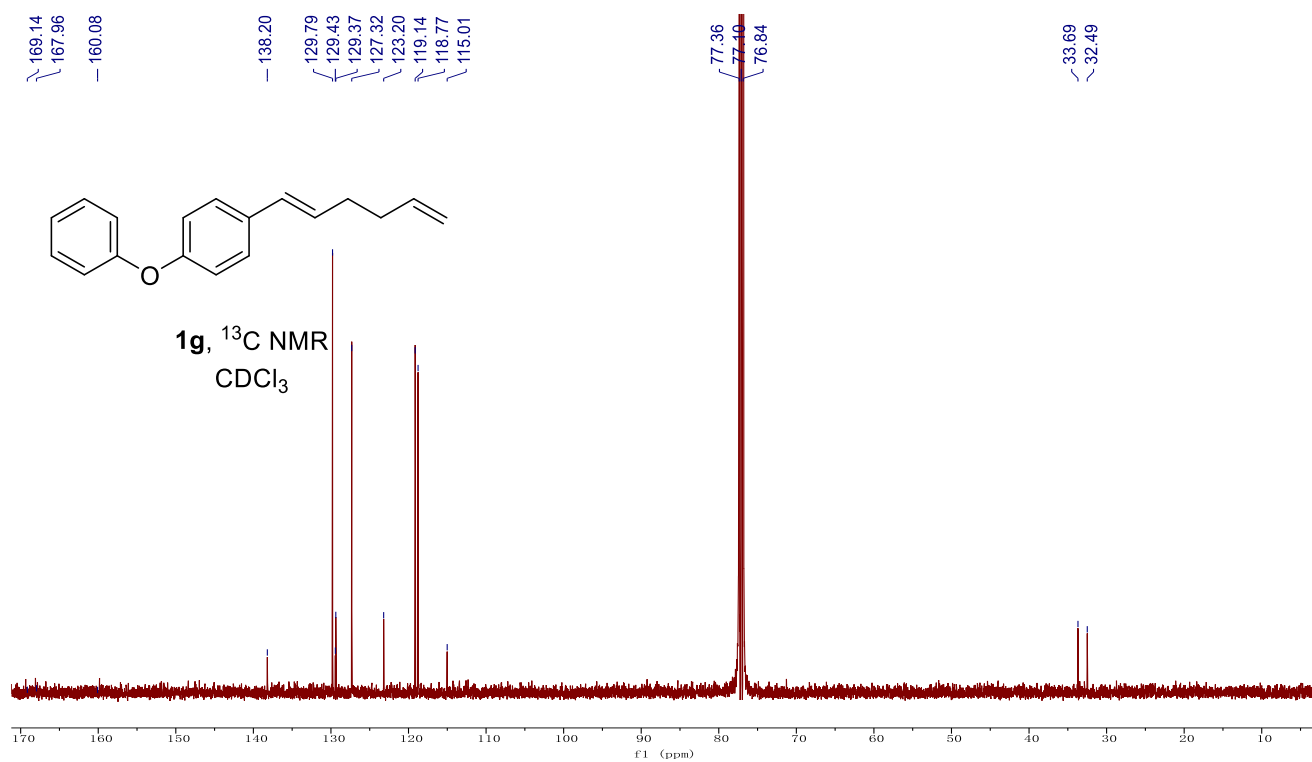

Supplementary Fig. 65. <sup>1</sup>H NMR and <sup>13</sup>C NMR spectra of compound **1g**.

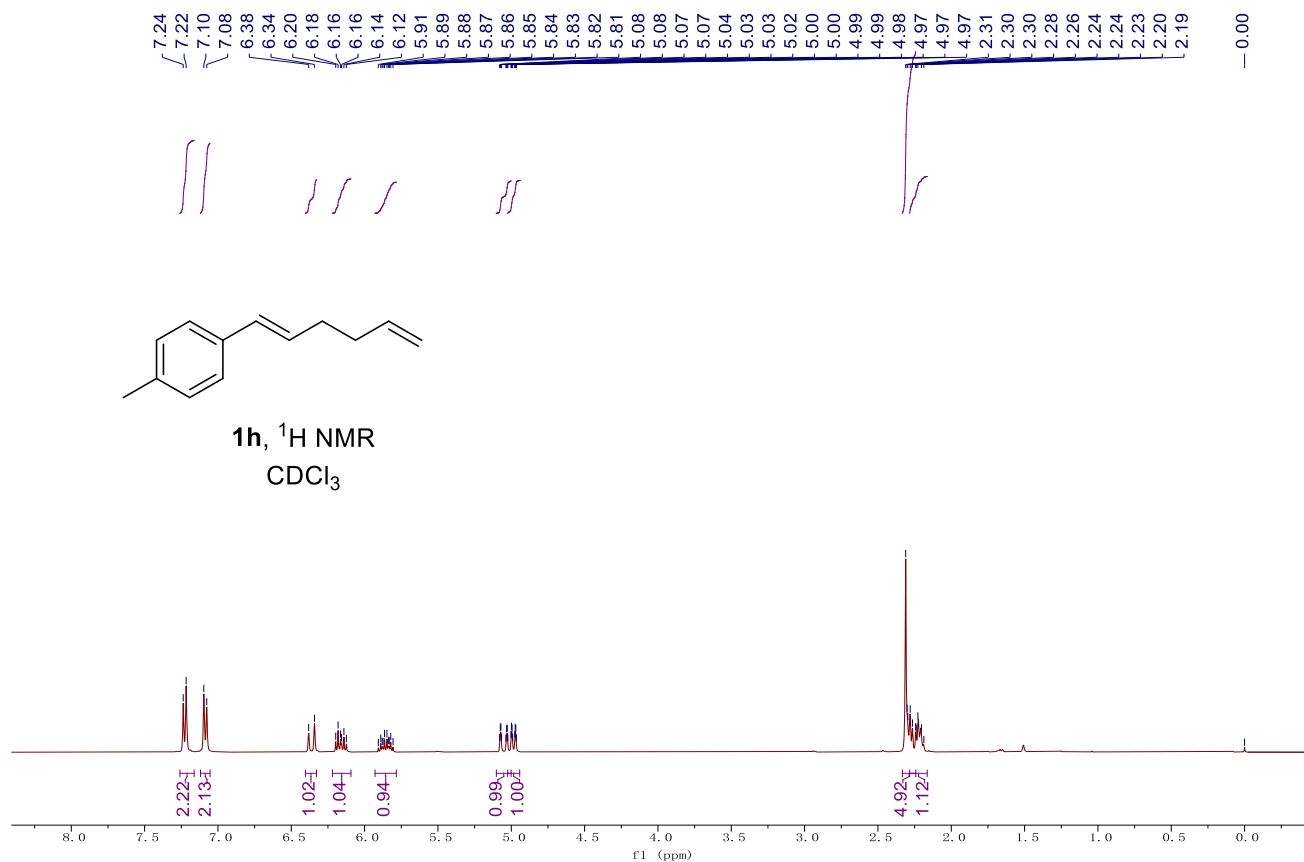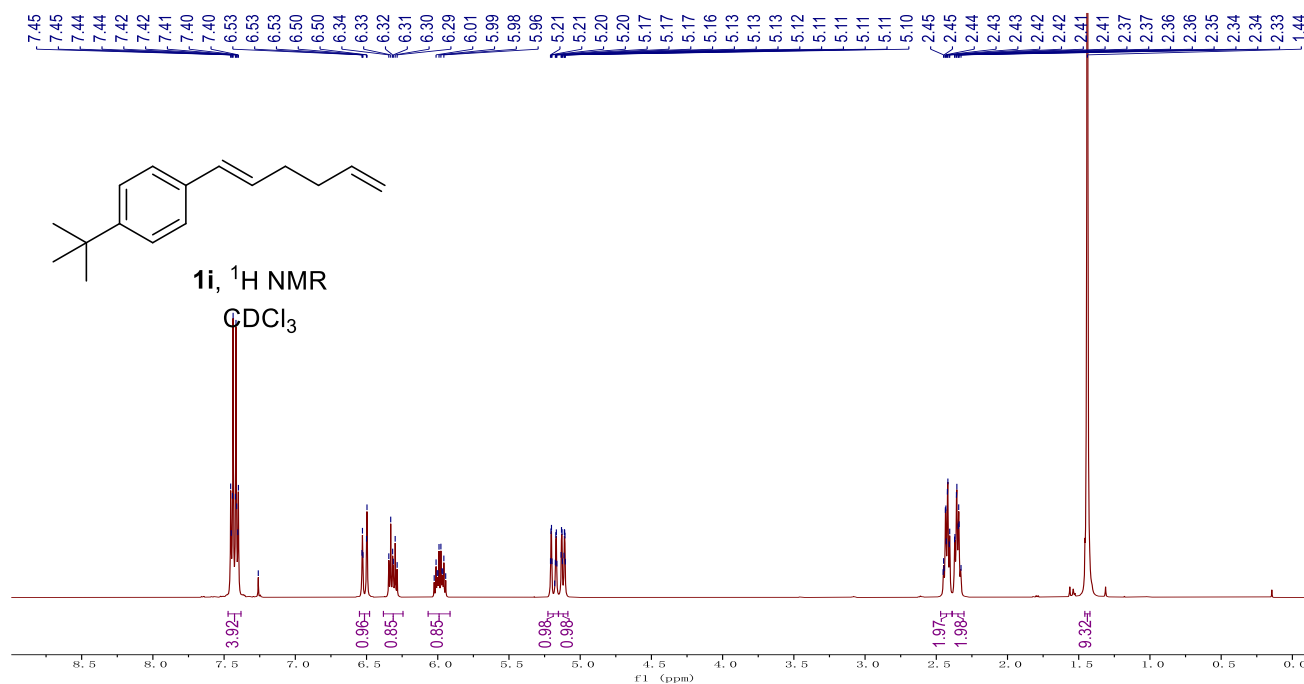

**Supplementary Fig. 66.** <sup>1</sup>H NMR spectra of compound **1h** and **1i**.

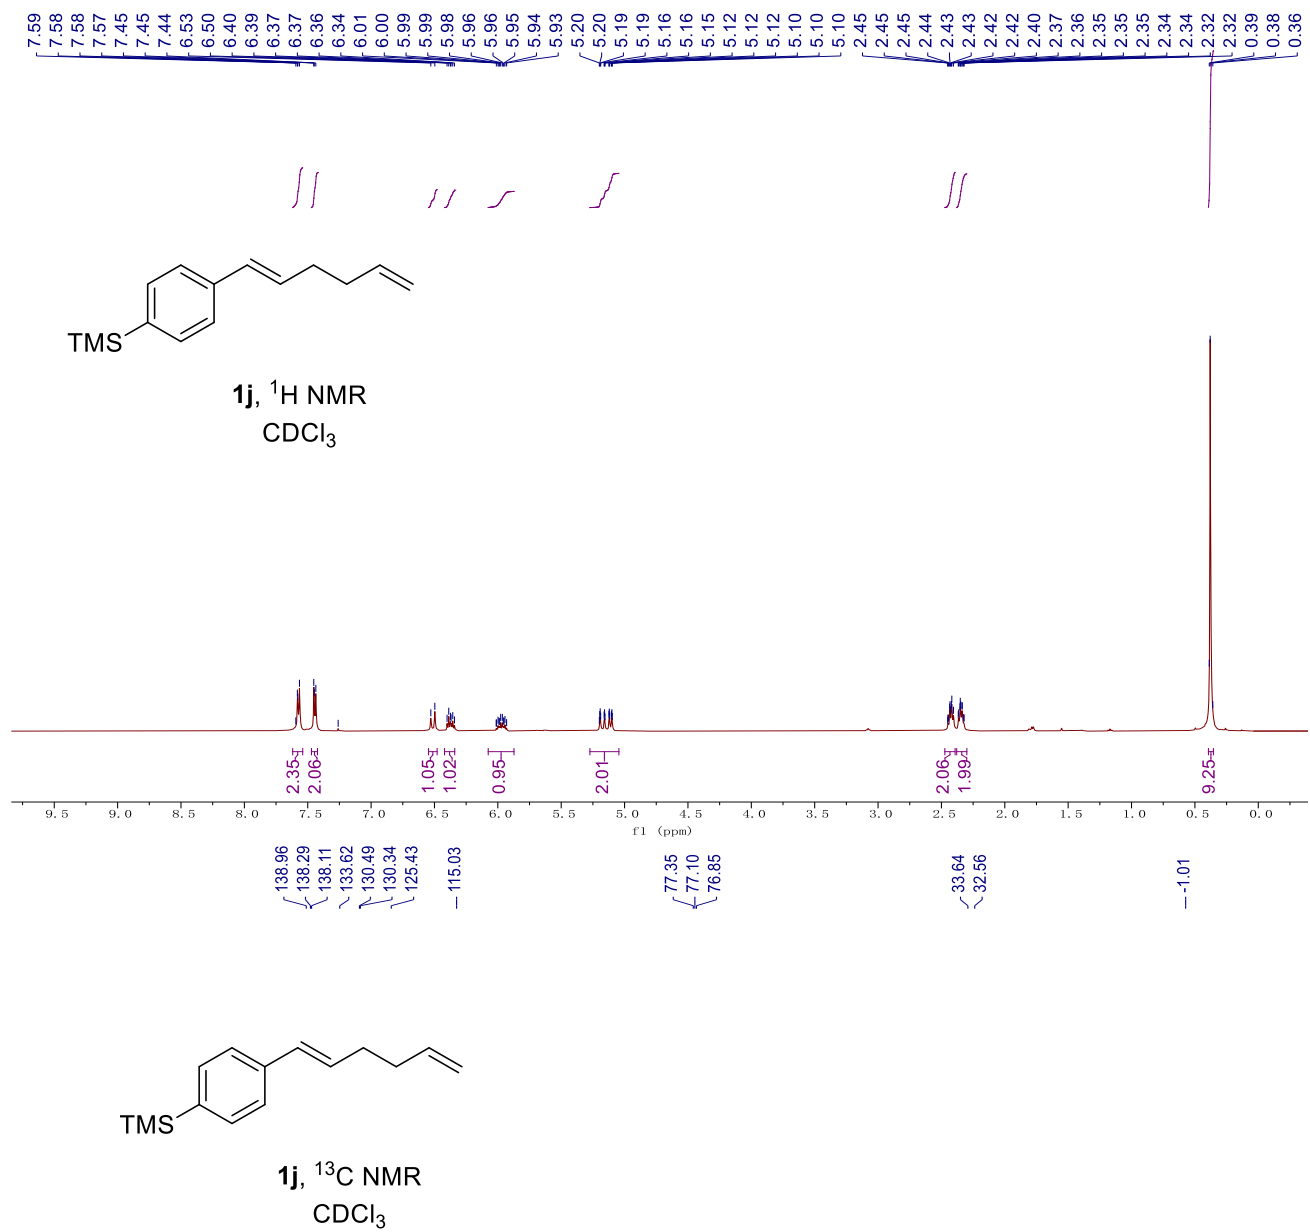

Supplementary Fig. 67.  $^1\text{H}$  NMR and  $^{13}\text{C}$  NMR spectra of compound **1j**.

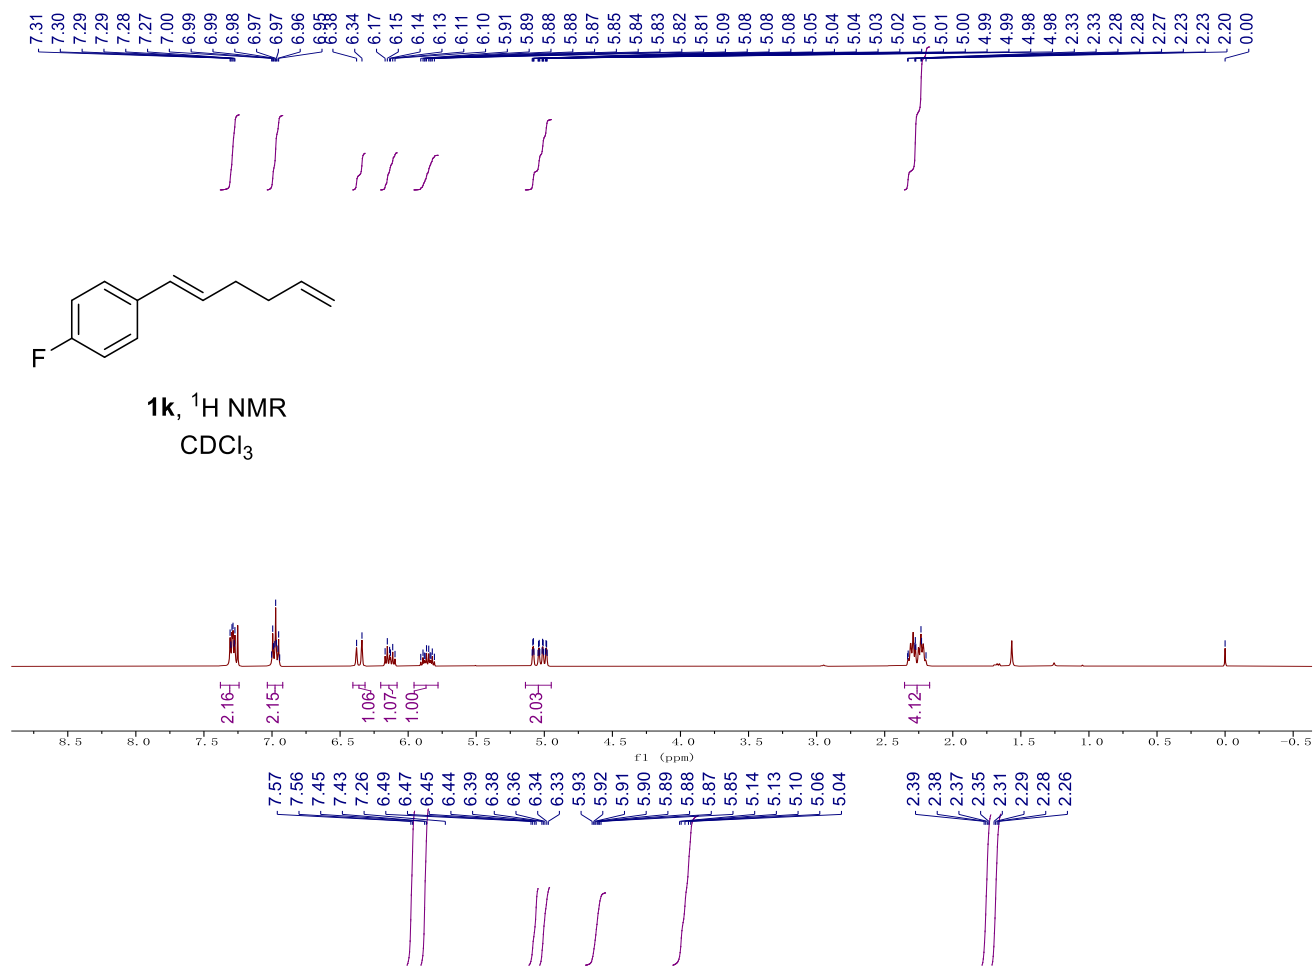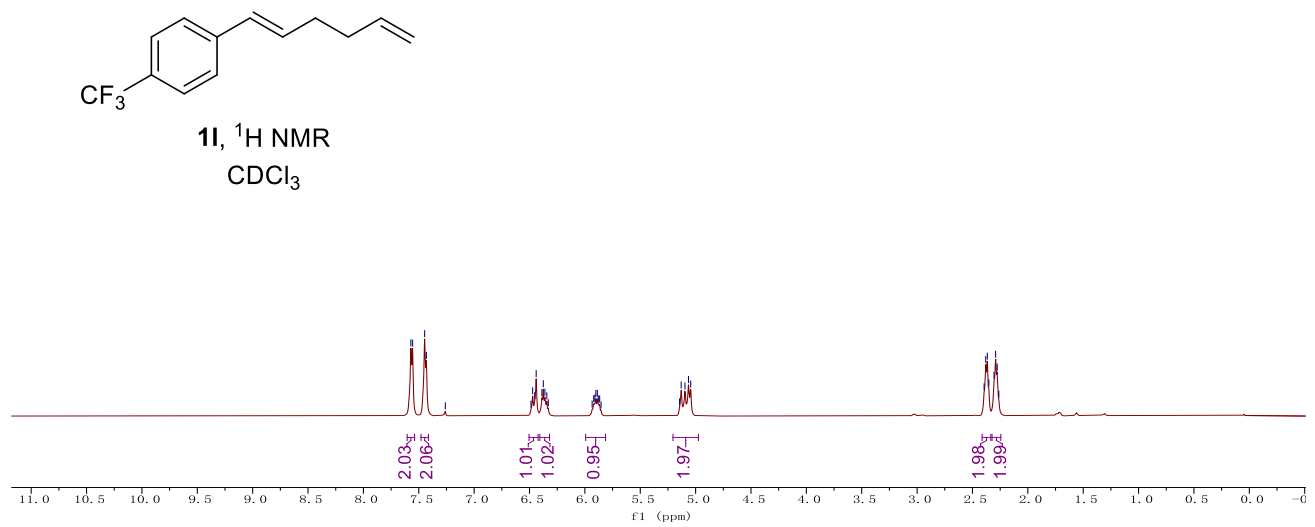

**Supplementary Fig. 68.**  $^1\text{H}$  NMR spectra of compound **1k** and **1l**.



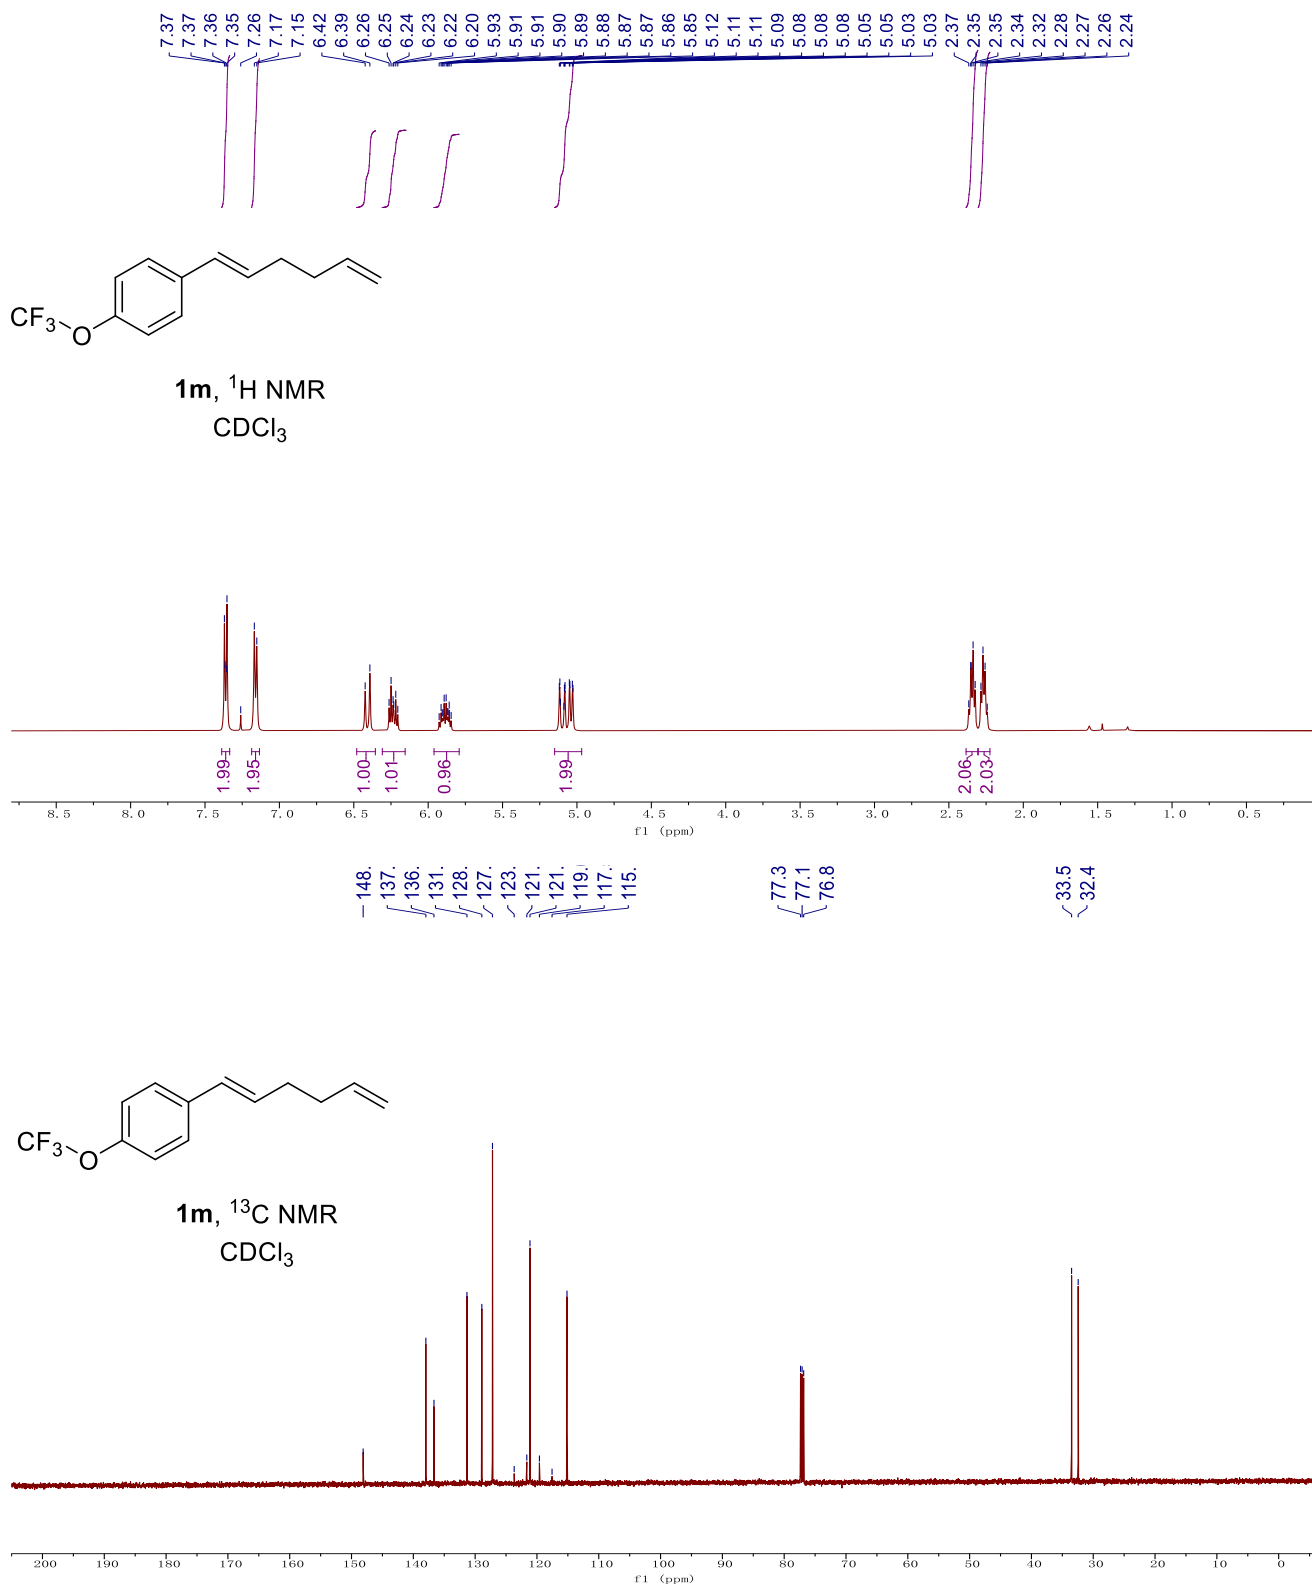

**Supplementary Fig. 69.**  $^1\text{H}$  NMR and  $^{13}\text{C}$  NMR spectra of compound **1m**.

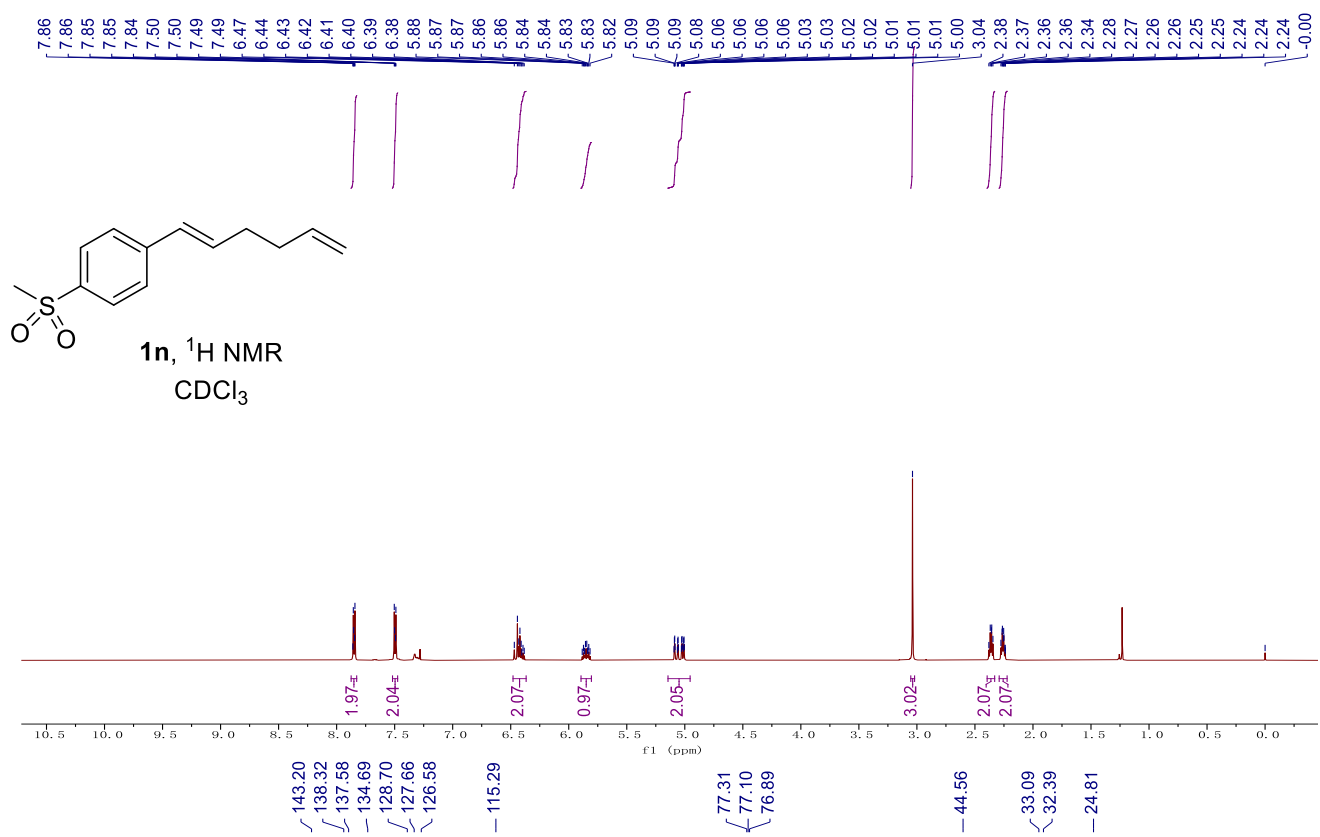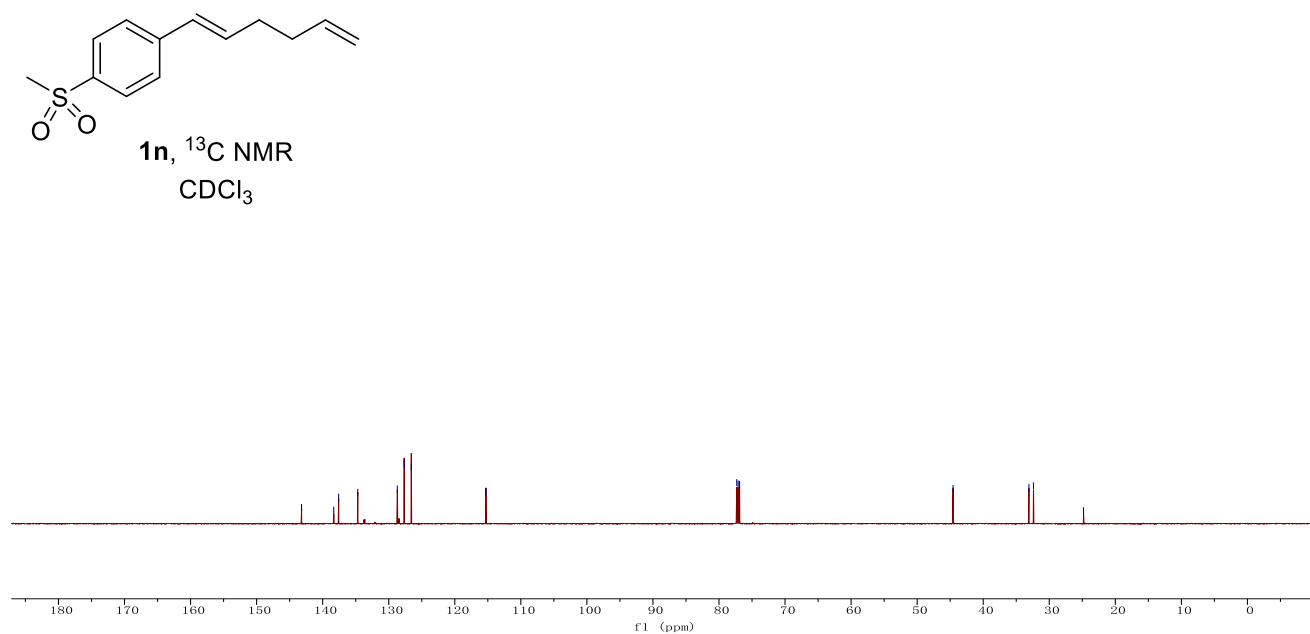

Supplementary Fig. 70.  $^1\text{H}$  NMR and  $^{13}\text{C}$  NMR spectra of compound **1n**.

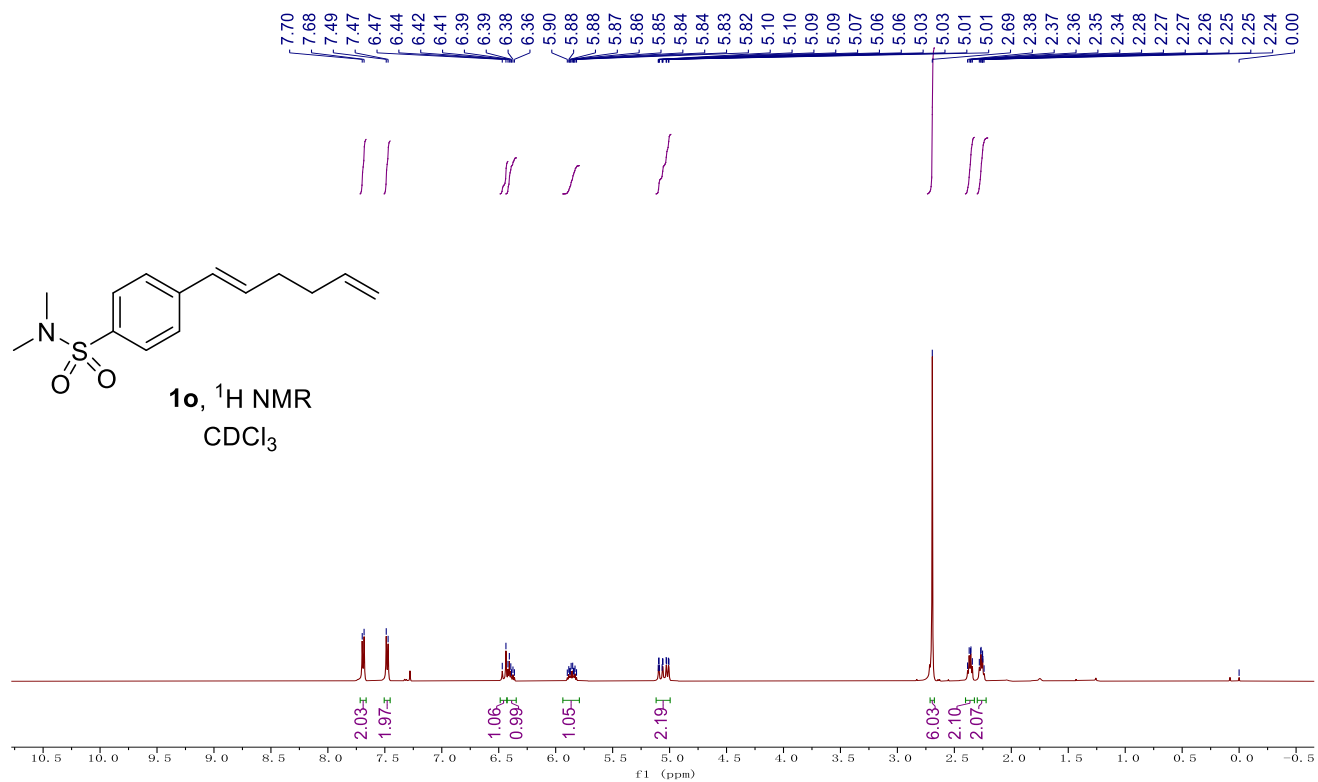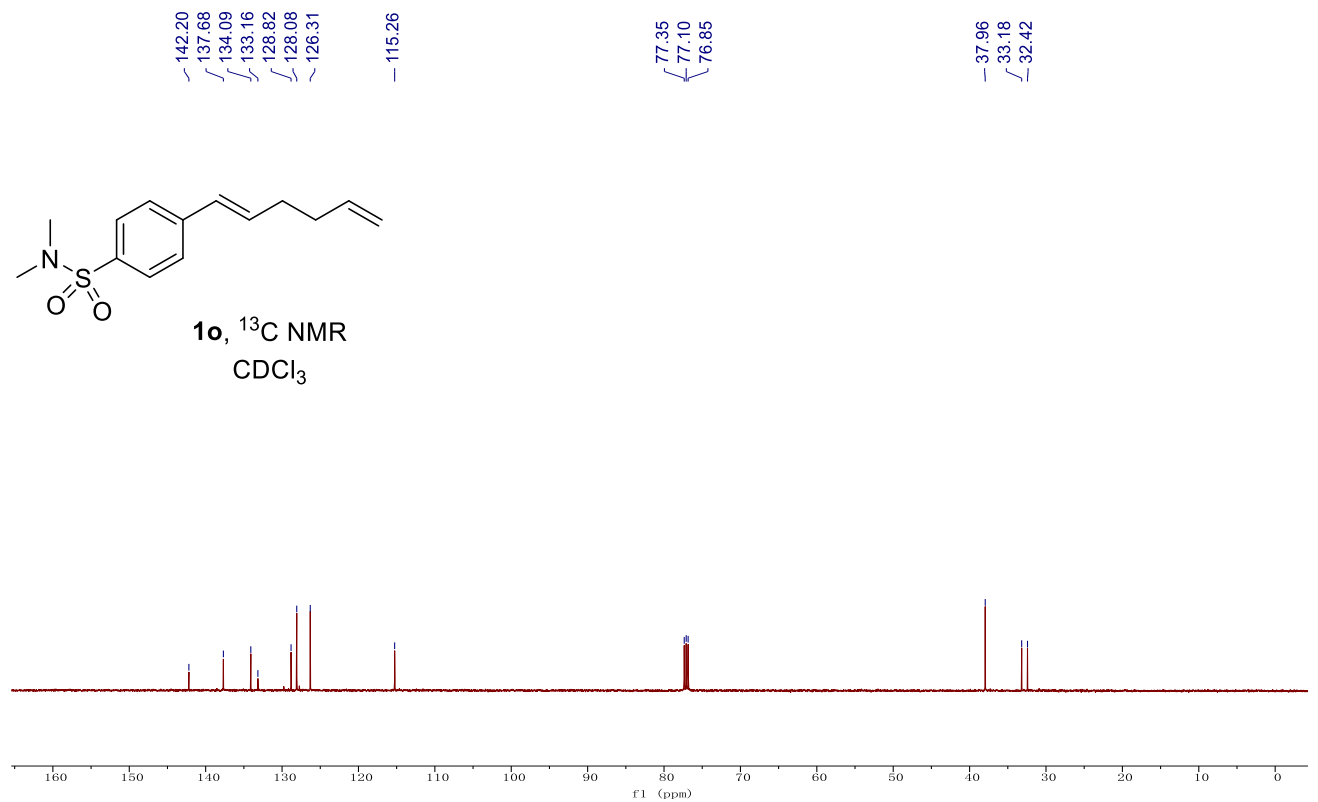

**Supplementary Fig. 71.**  $^1\text{H NMR}$  and  $^{13}\text{C NMR}$  spectra of compound **1o**.

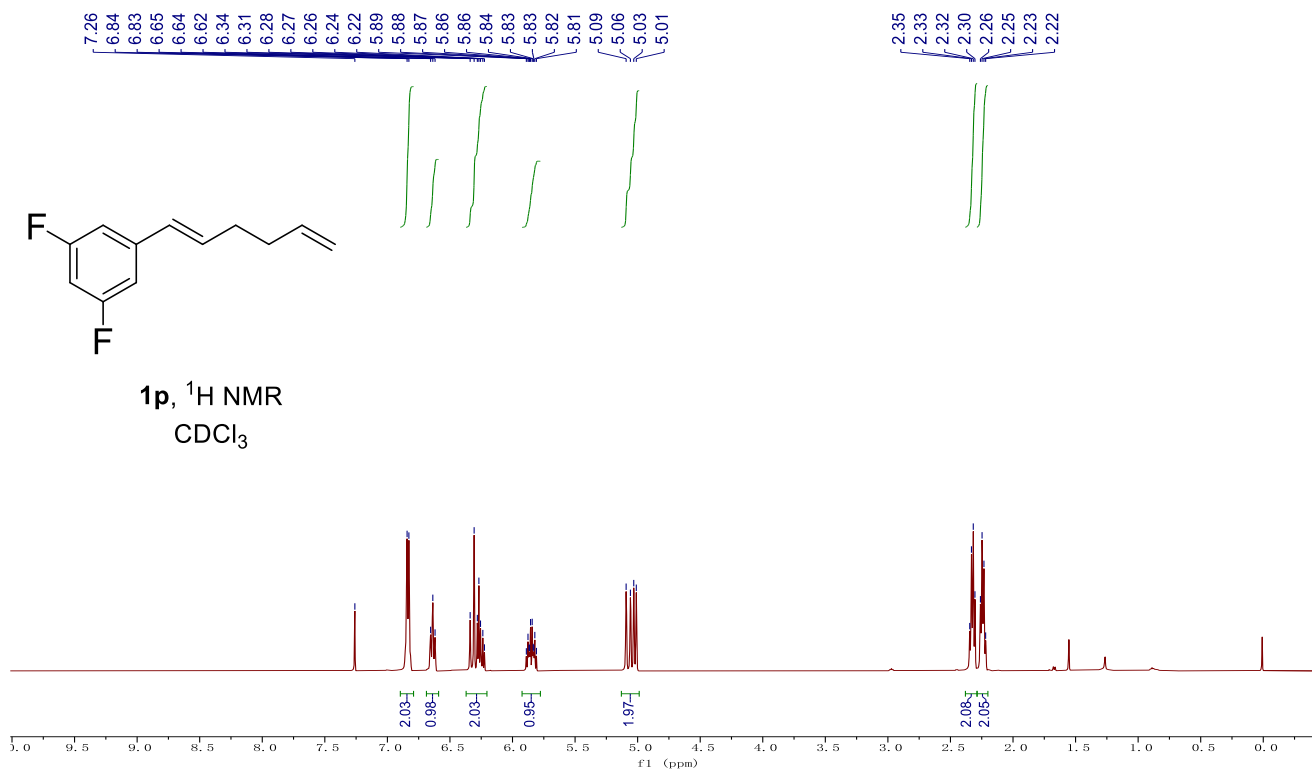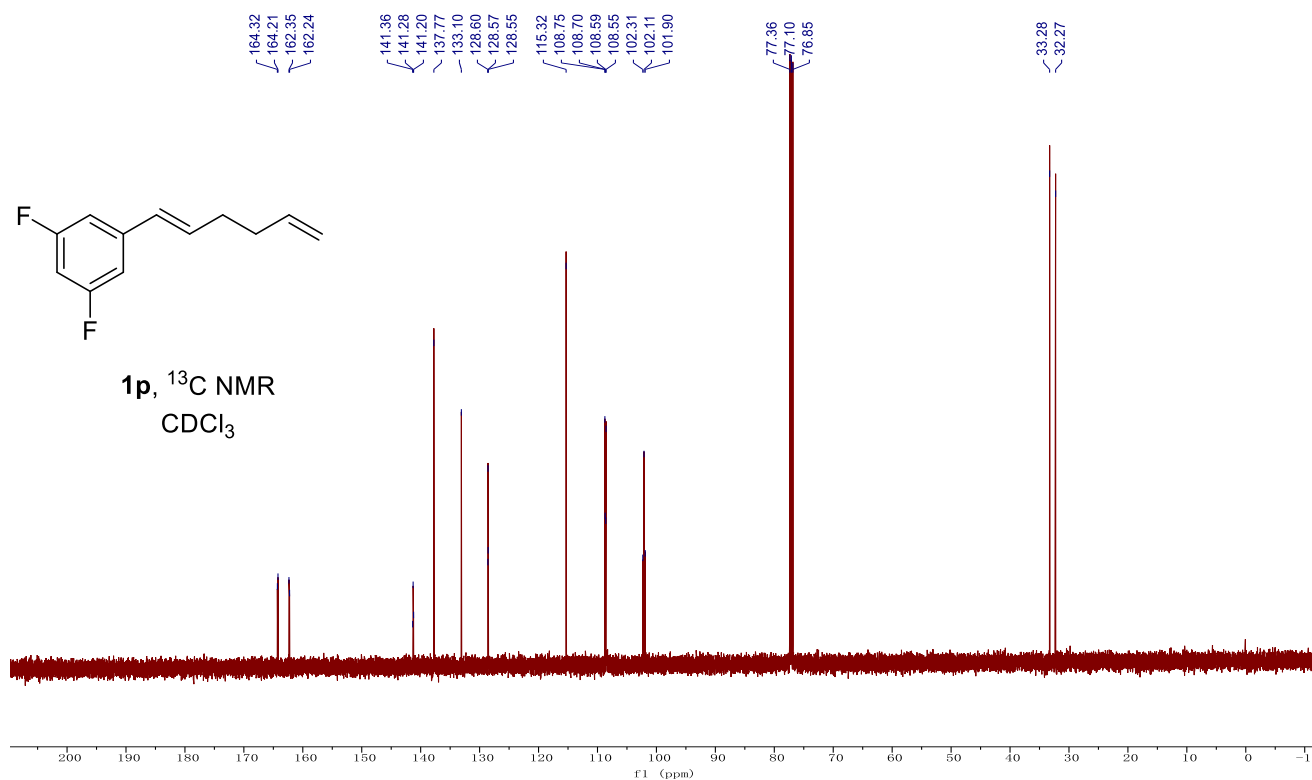

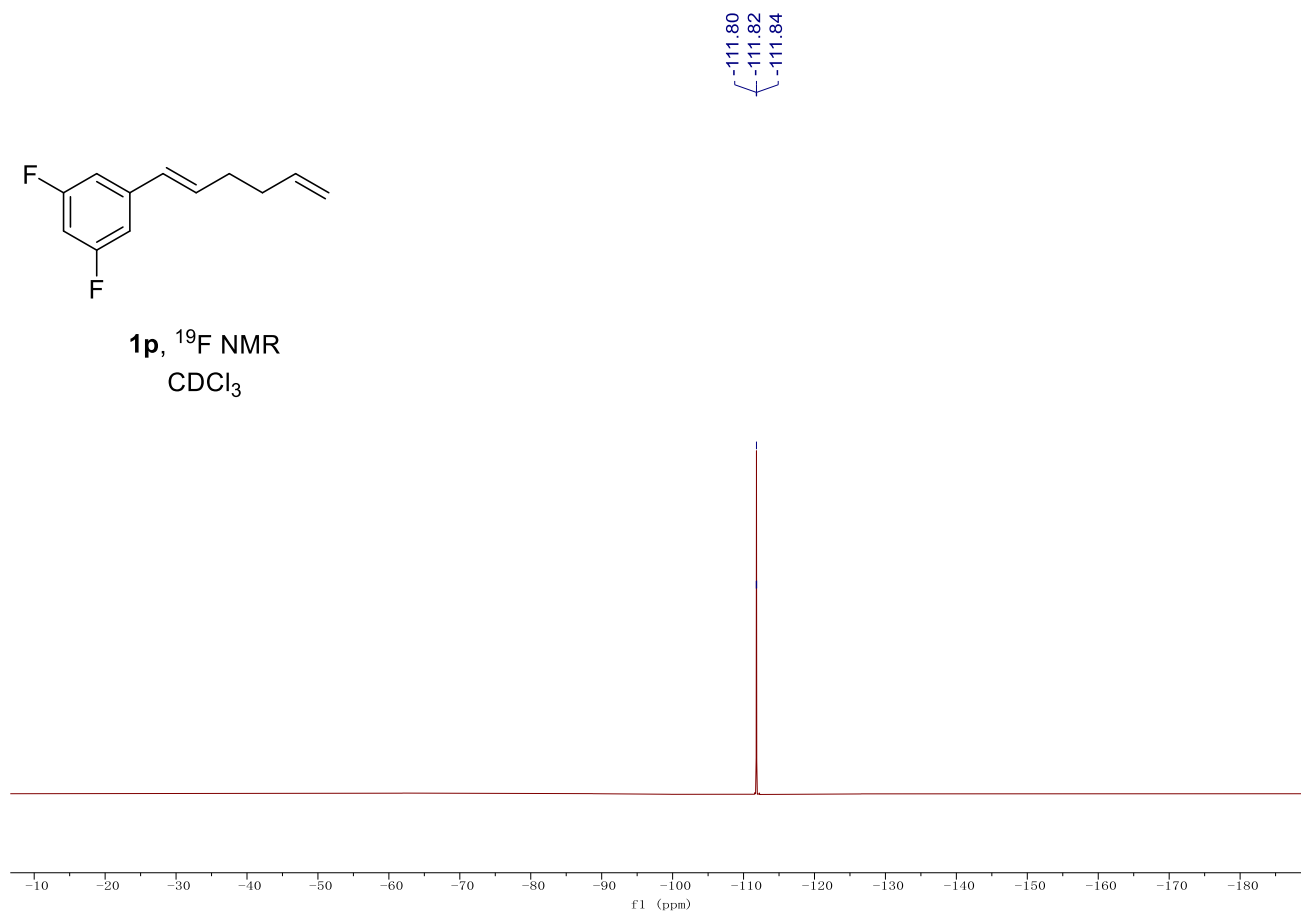

**Supplementary Fig. 72.**  $^1\text{H}$  NMR,  $^{13}\text{C}$  NMR and  $^{19}\text{F}$  NMR spectra of compound **1p**.

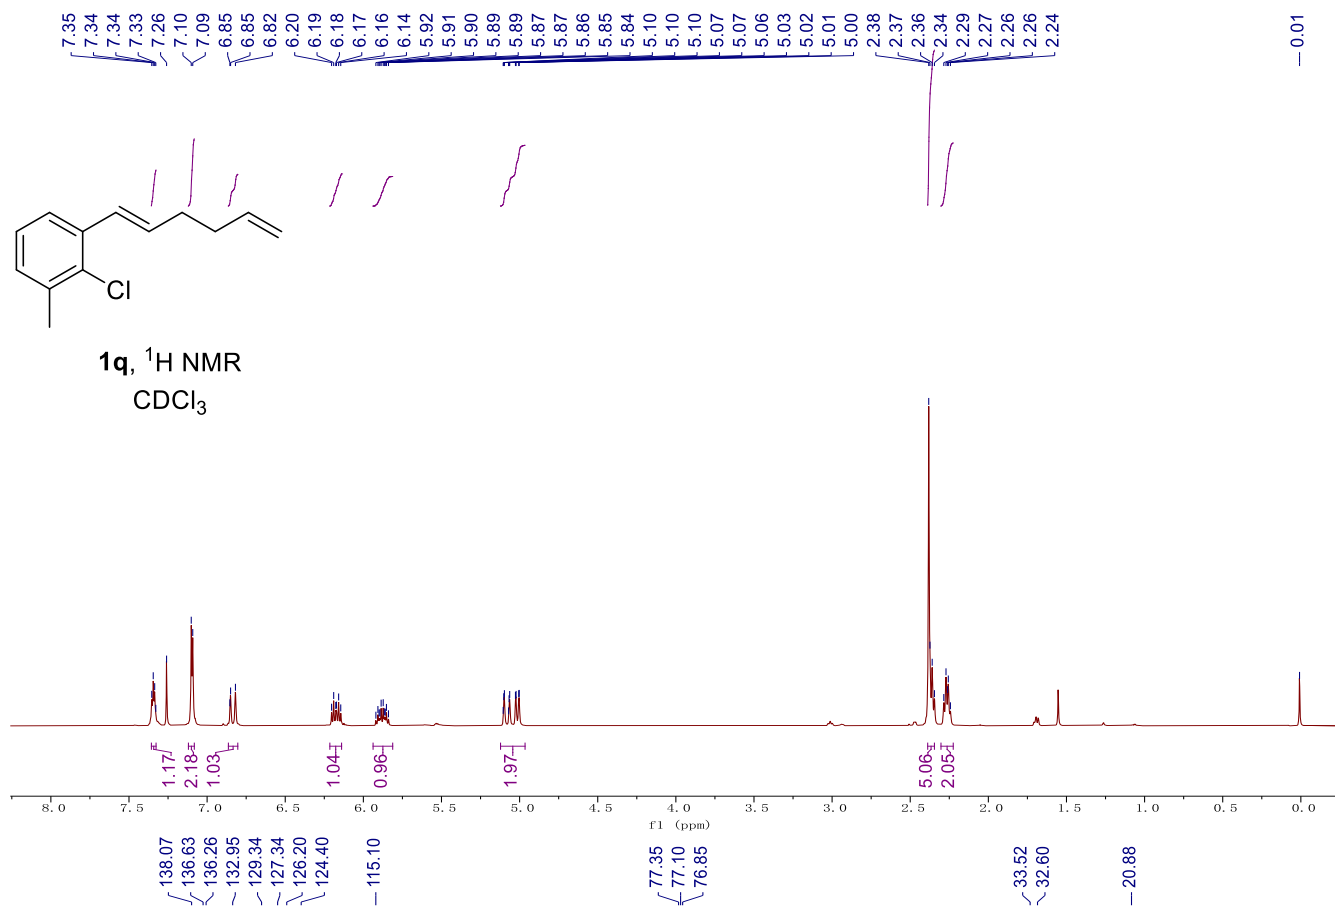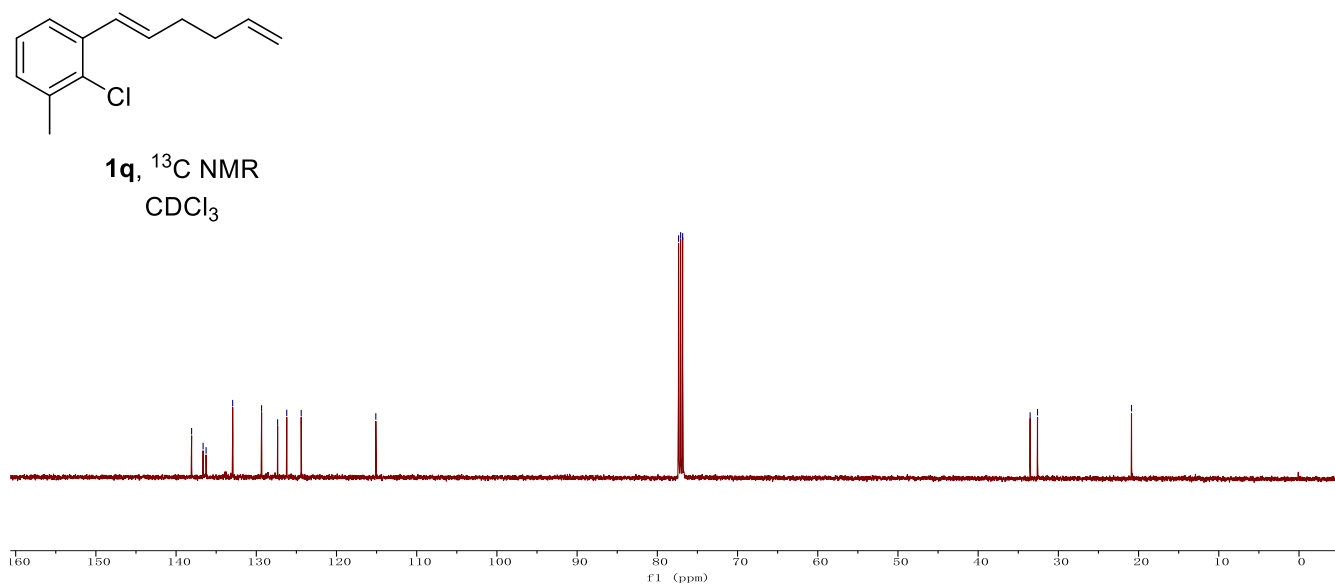

Supplementary Fig. 73. <sup>1</sup>H NMR and <sup>13</sup>C NMR spectra of compound 1q.

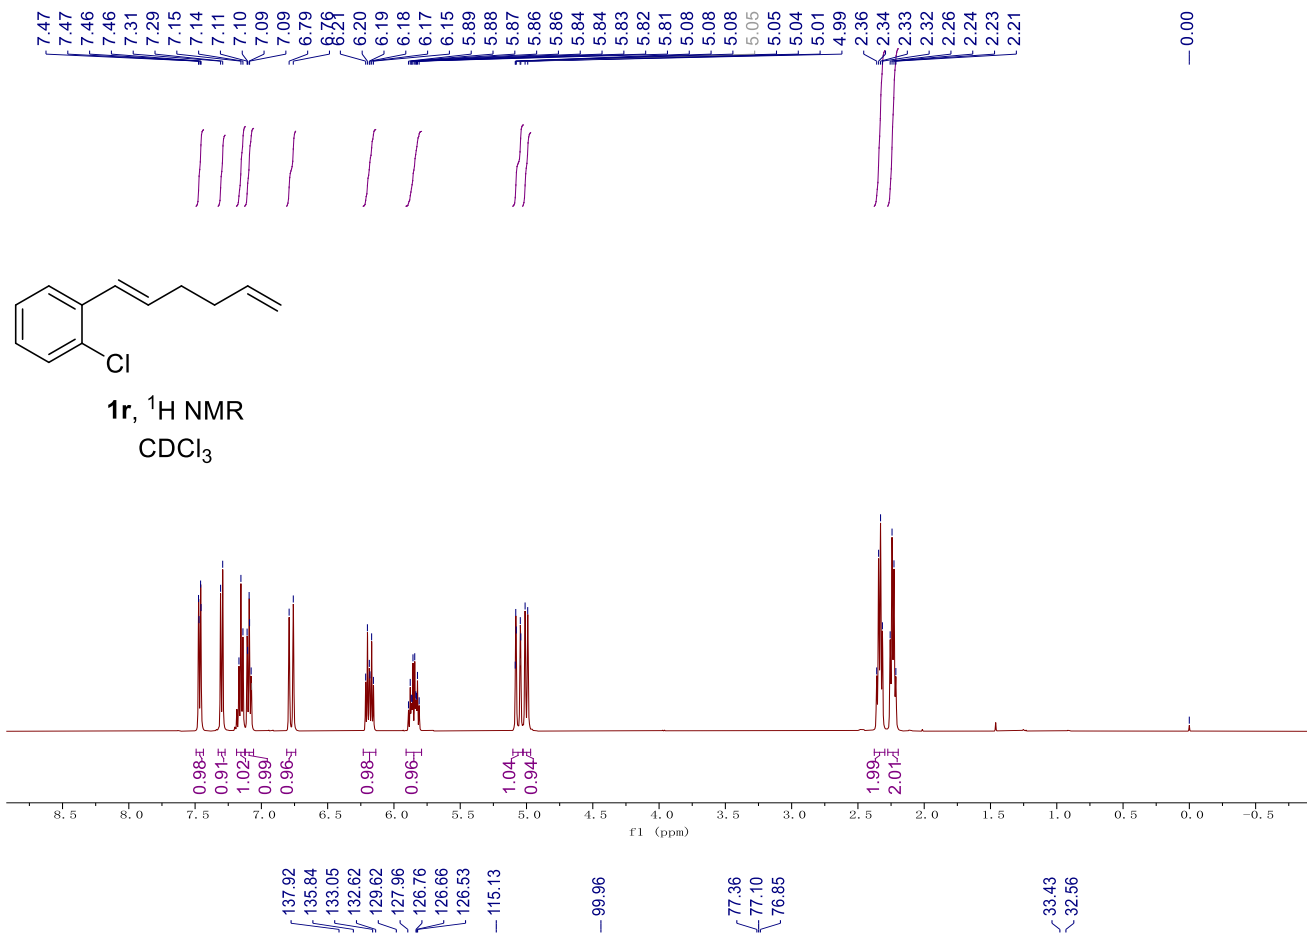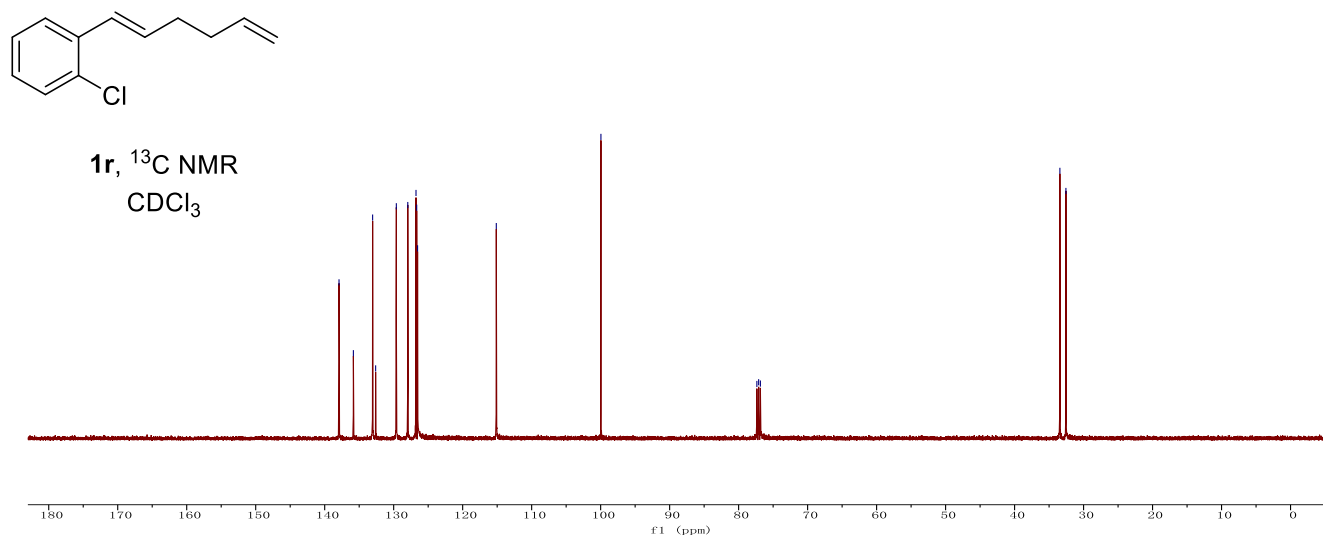

**Supplementary Fig. 74.**  $^1\text{H}$  NMR and  $^{13}\text{C}$  NMR spectra of compound **1r**.

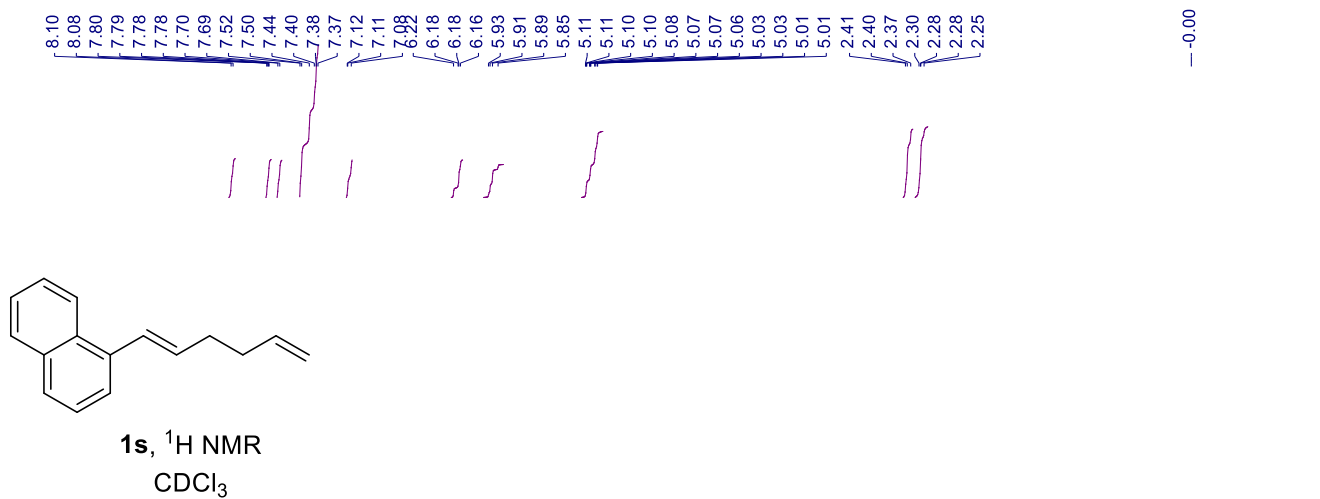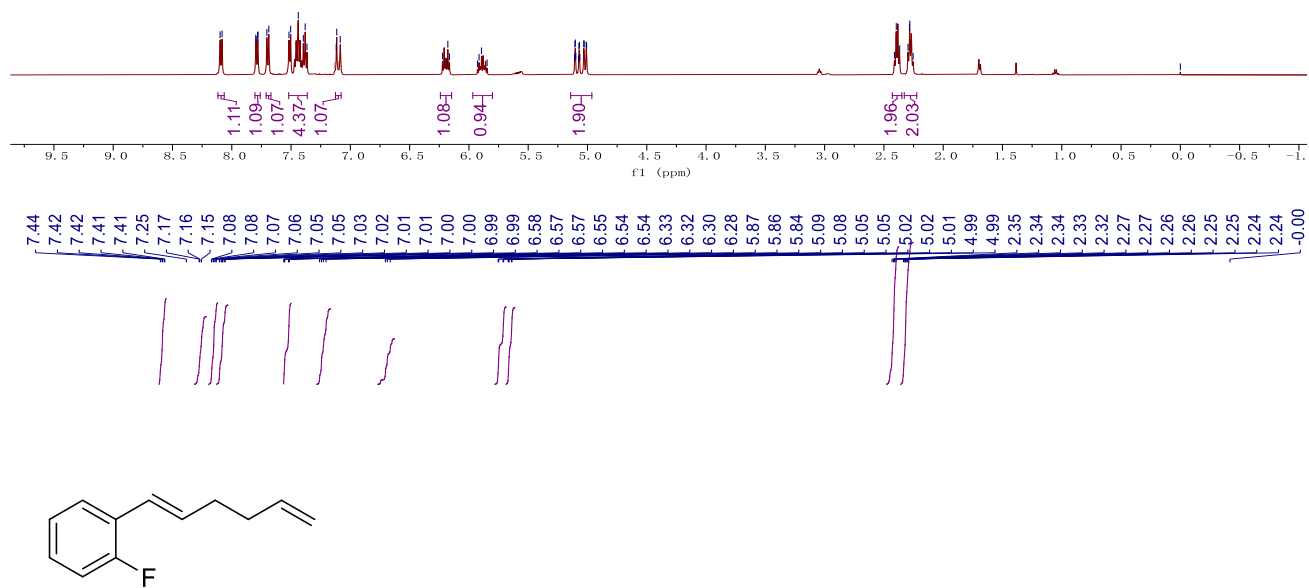

**Supplementary Fig. 75.**  $^1\text{H NMR}$  spectra of compound **1s** and **1t**.



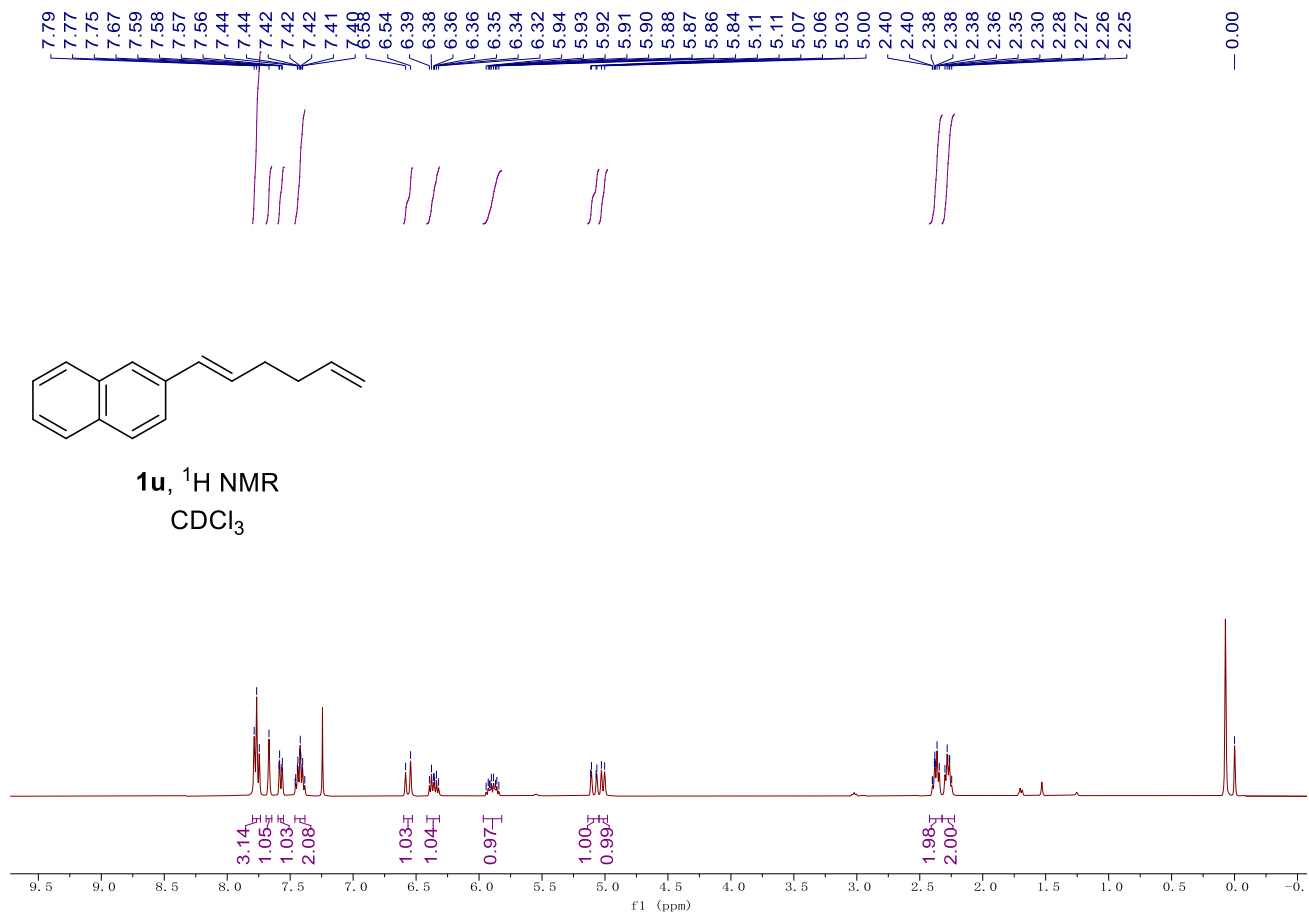

**Supplementary Fig. 76.**  $^1\text{H}$  NMR spectra of compound **1u**.

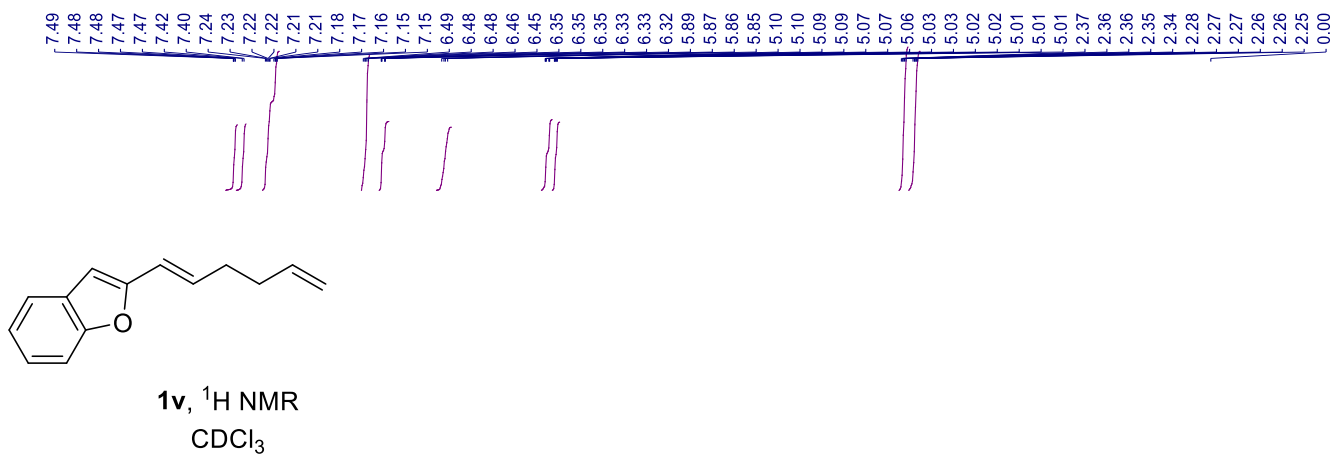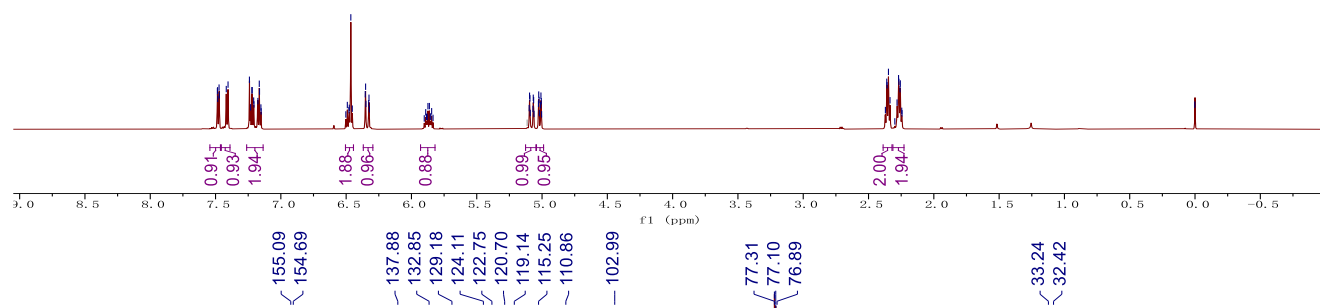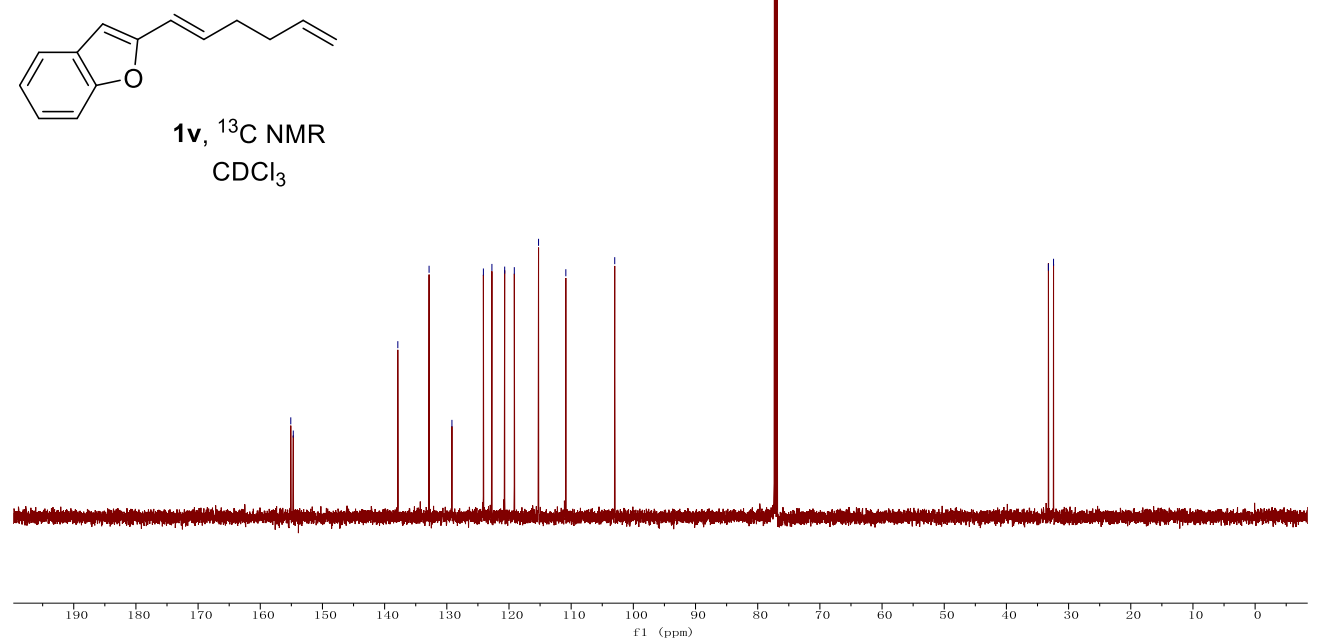

**Supplementary Fig. 77.**  $^1\text{H NMR}$  and  $^{13}\text{C NMR}$  spectra of compound **1v**.

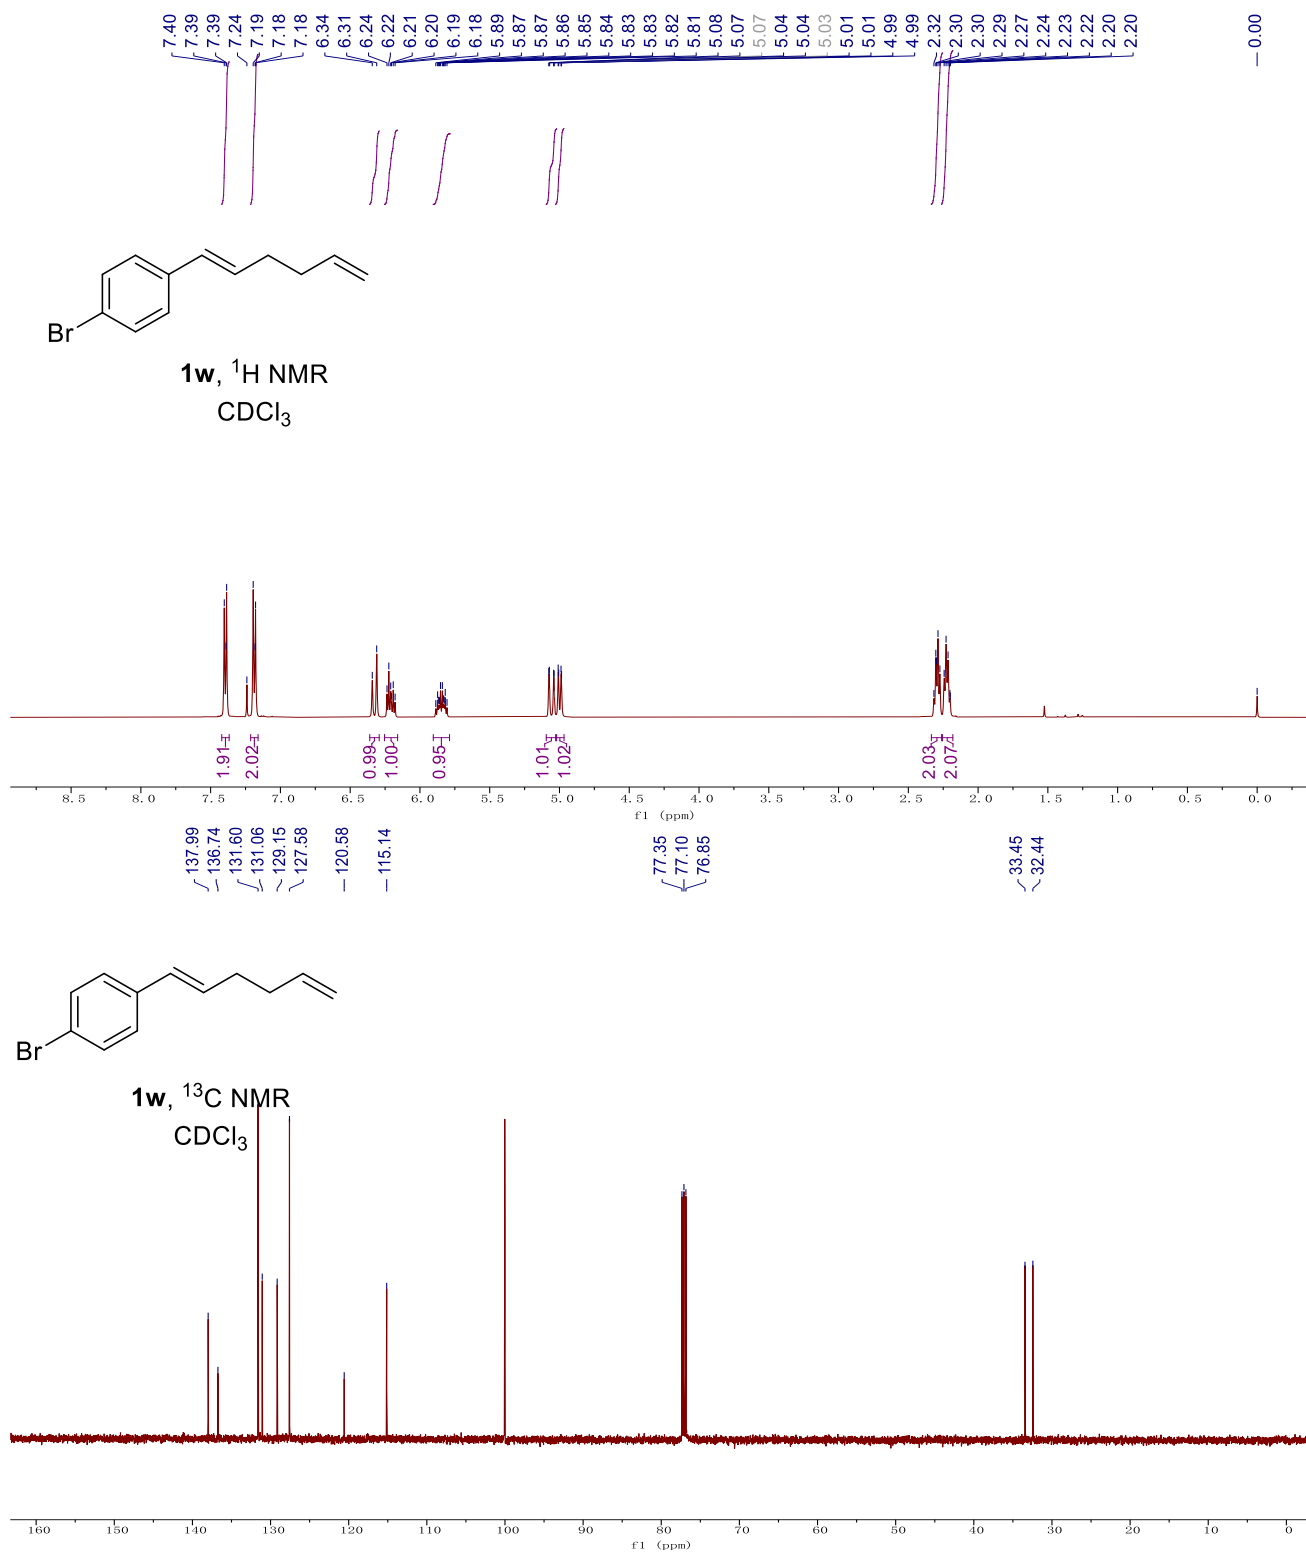

Supplementary Fig. 78.  $^1\text{H}$  NMR and  $^{13}\text{C}$  NMR spectra of compound **1w**.

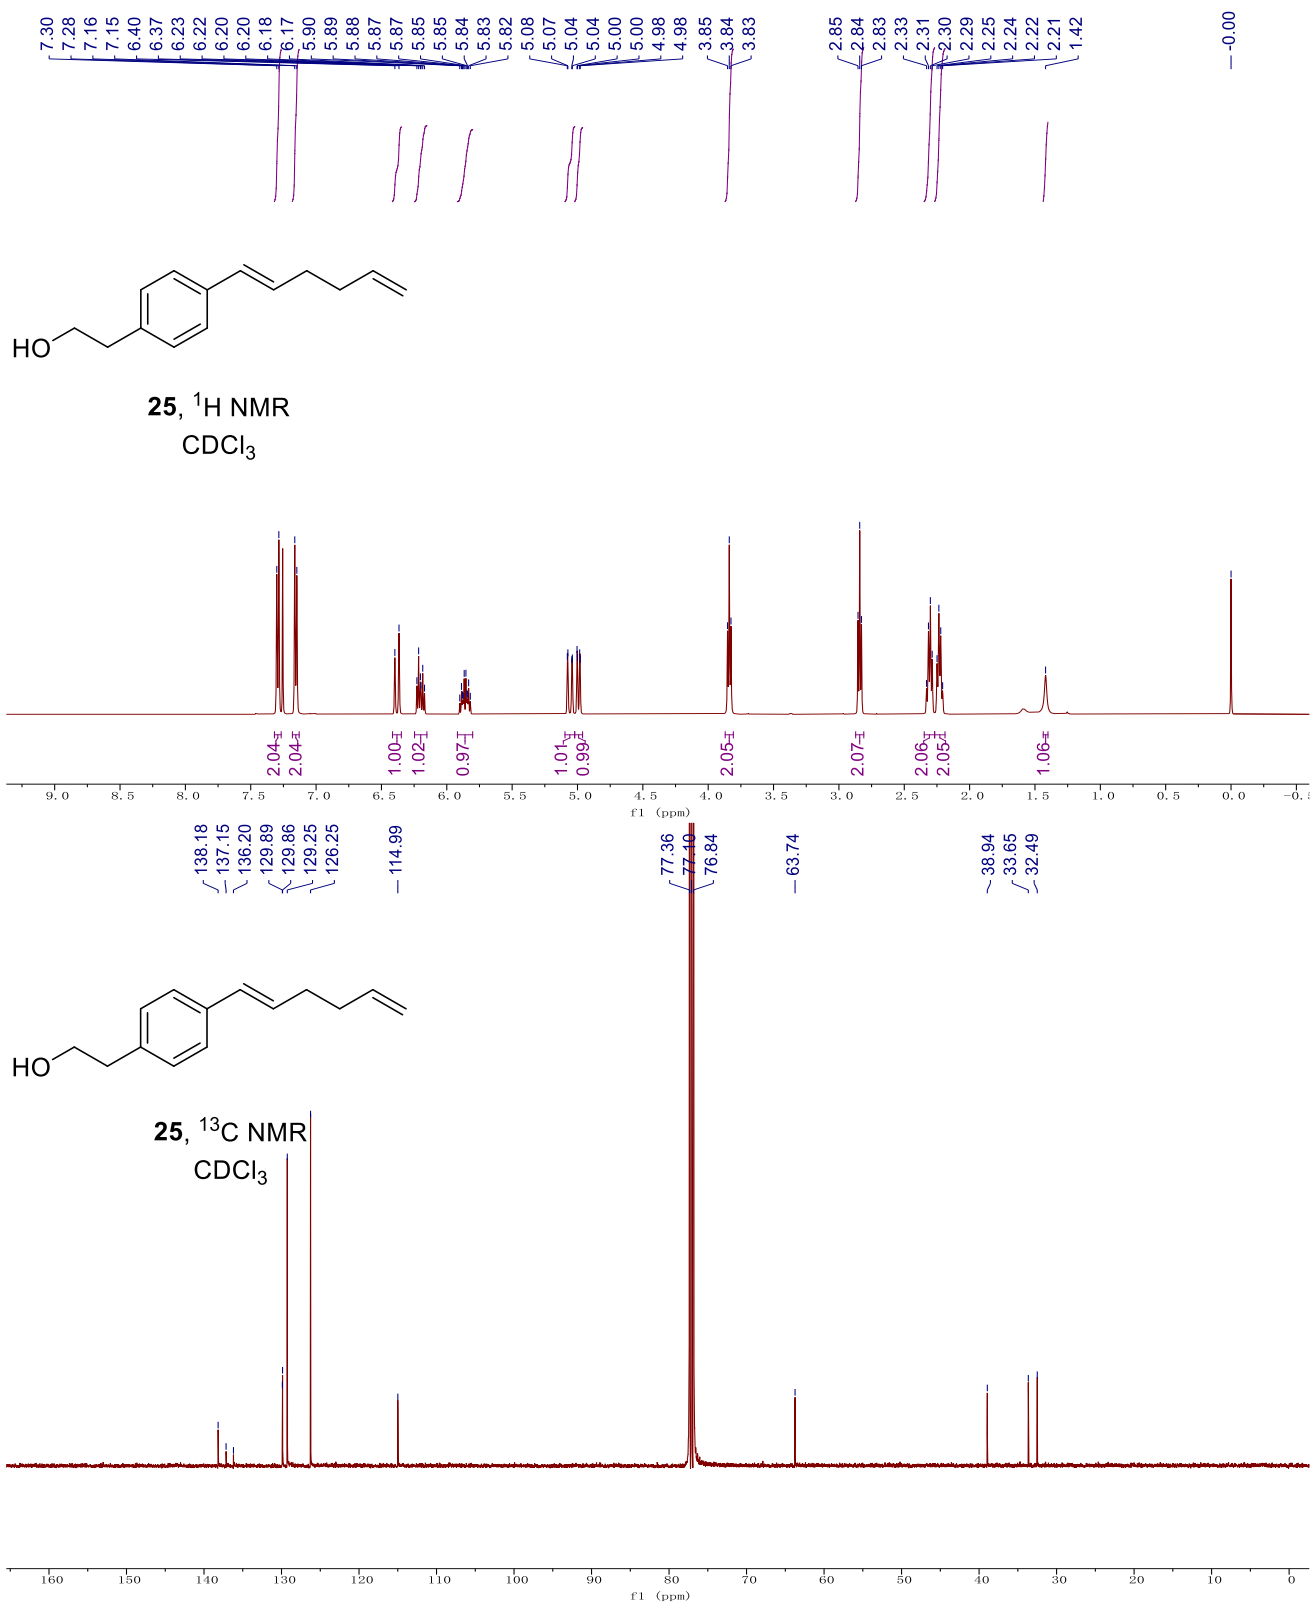

Supplementary Fig. 79. <sup>1</sup>H NMR and <sup>13</sup>C NMR spectra of compound 25.

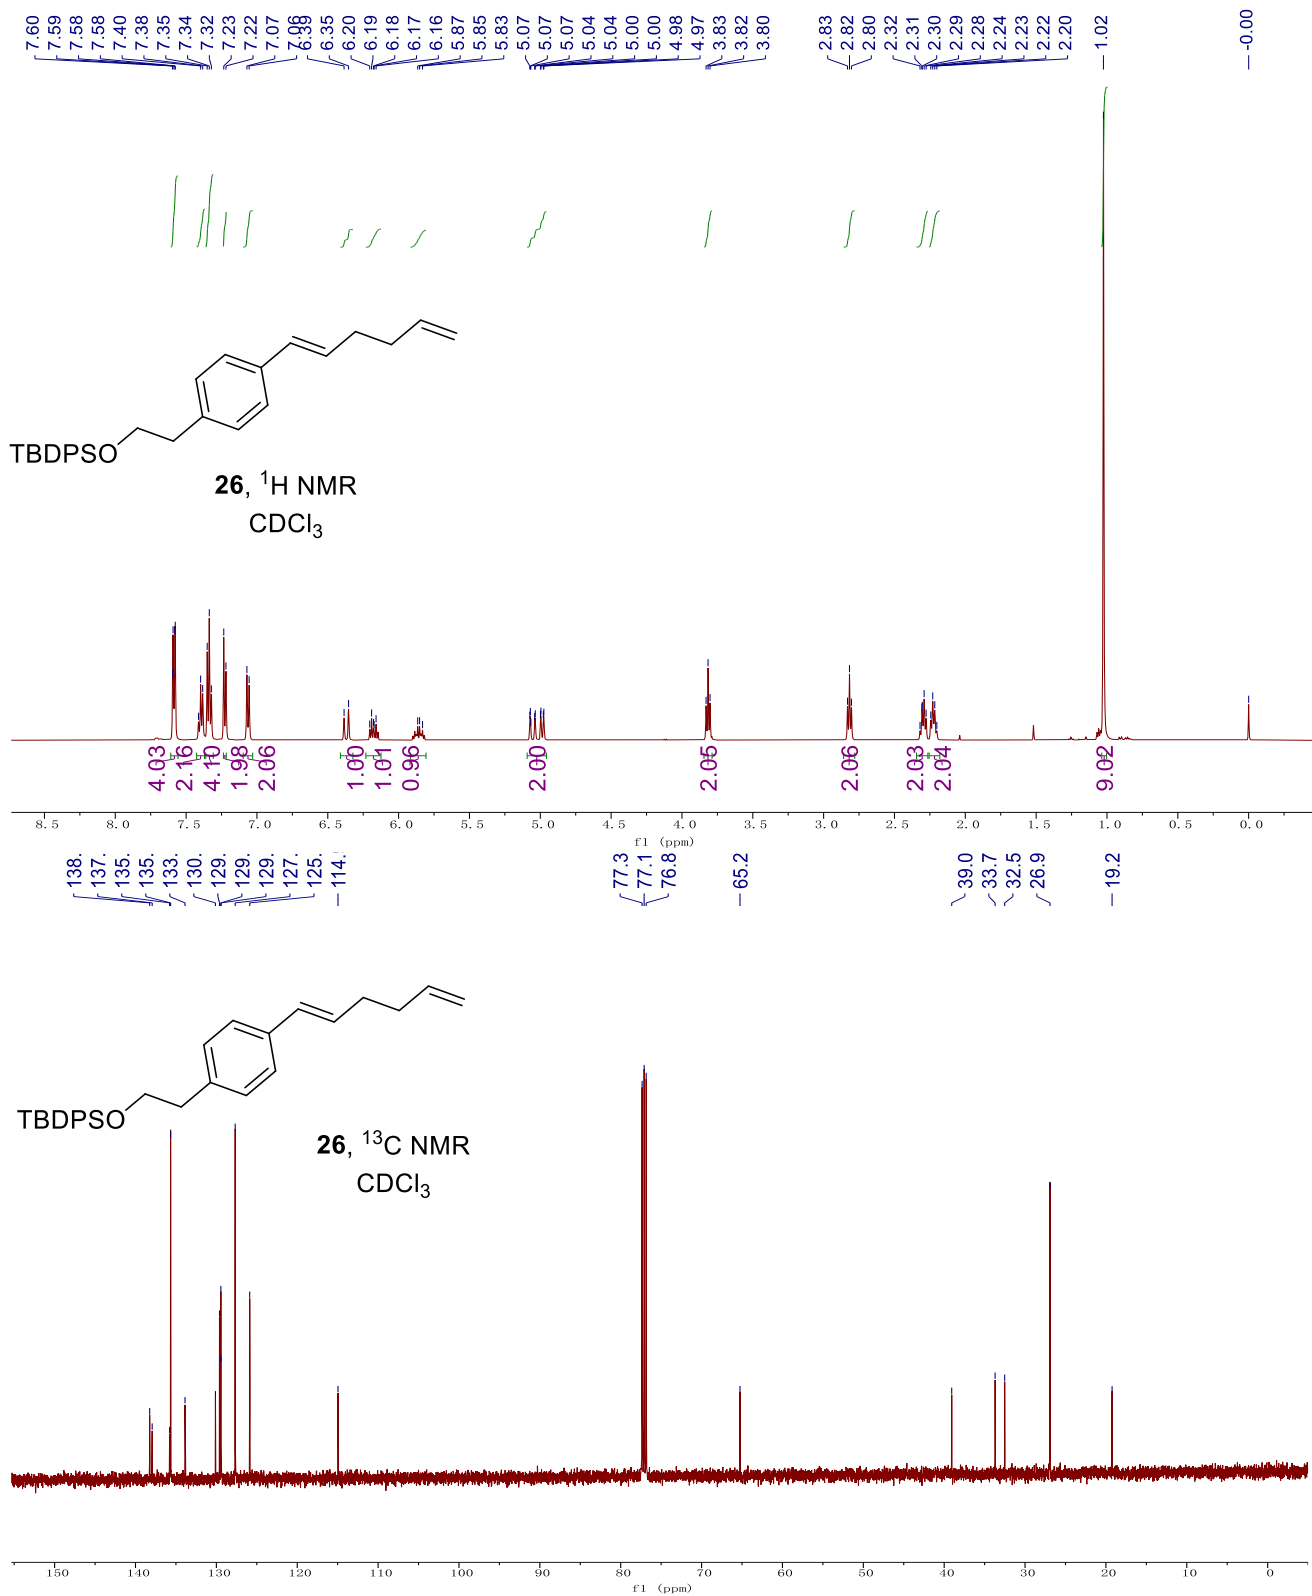

Supplementary Fig. 80. <sup>1</sup>H NMR and <sup>13</sup>C NMR spectra of compound 26.

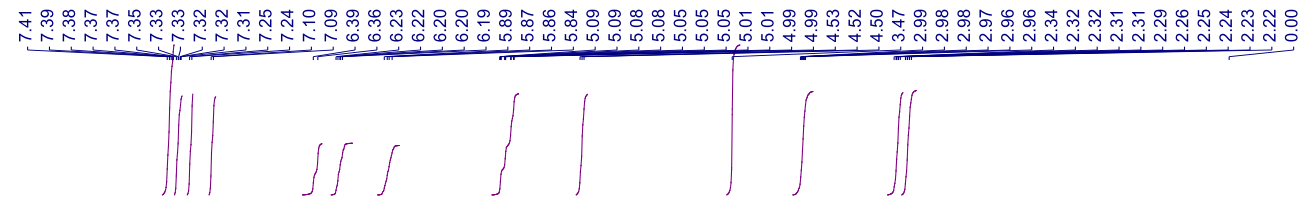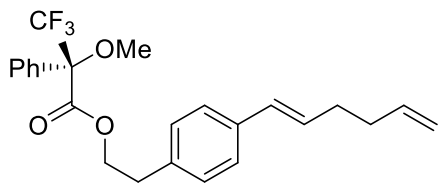

27, <sup>1</sup>H NMR  
CDCl<sub>3</sub>

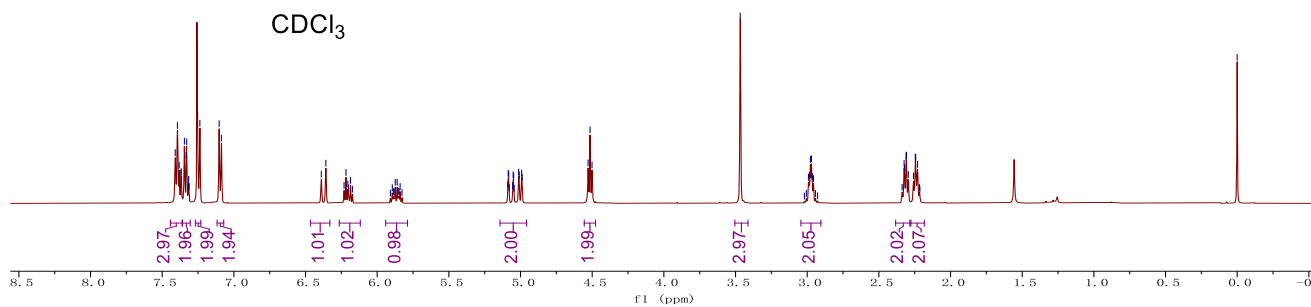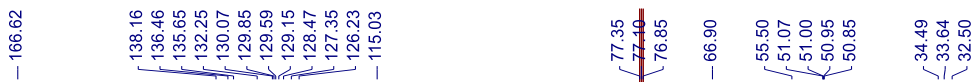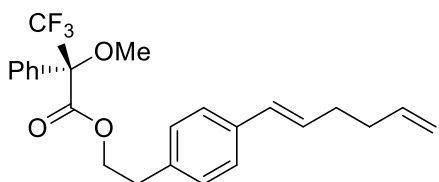

27, <sup>13</sup>C NMR  
CDCl<sub>3</sub>

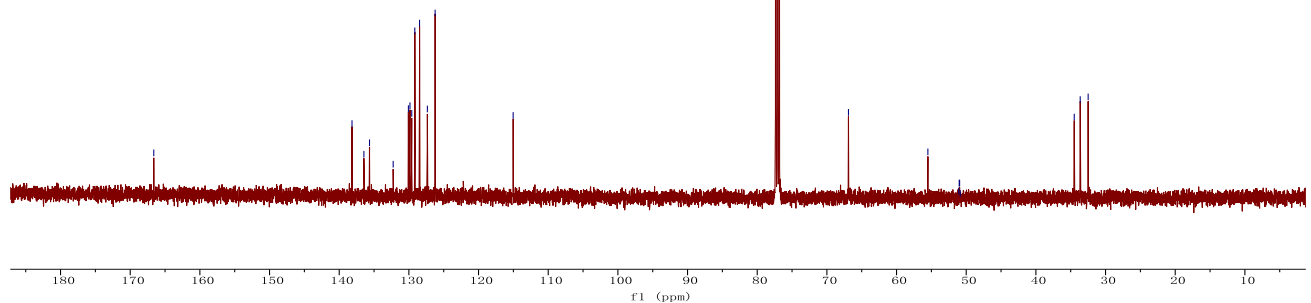

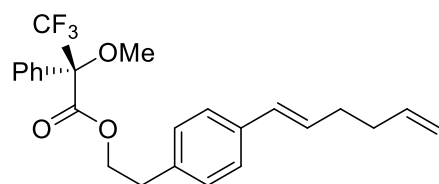

**27**, <sup>19</sup>F NMR  
CDCl<sub>3</sub>

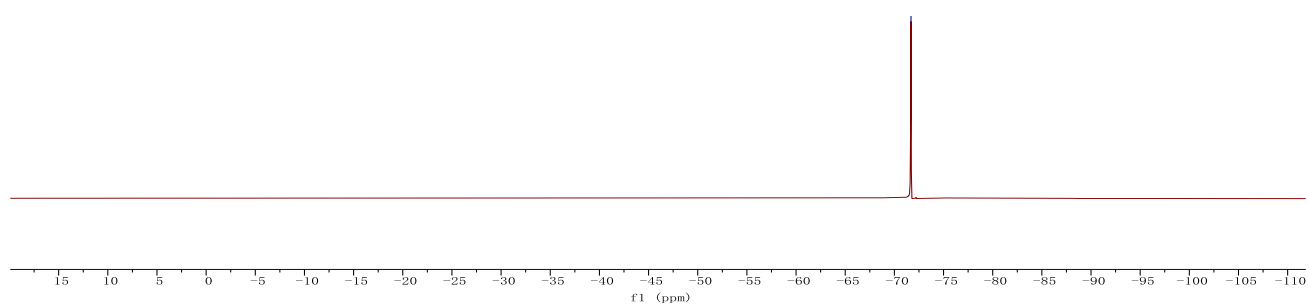

**Supplementary Fig. 81.** <sup>1</sup>H NMR, <sup>13</sup>C NMR and <sup>19</sup>F NMR spectra of compound **27**.

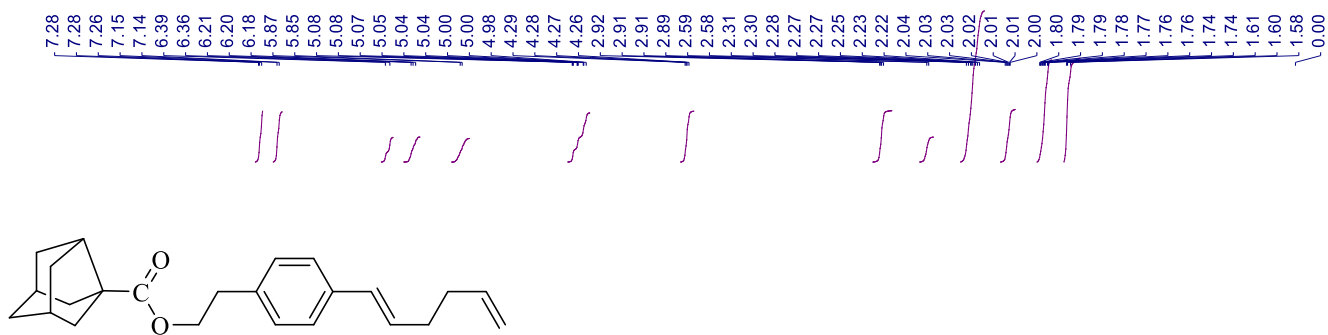

**28**,  $^1\text{H}$  NMR  
 $\text{CDCl}_3$

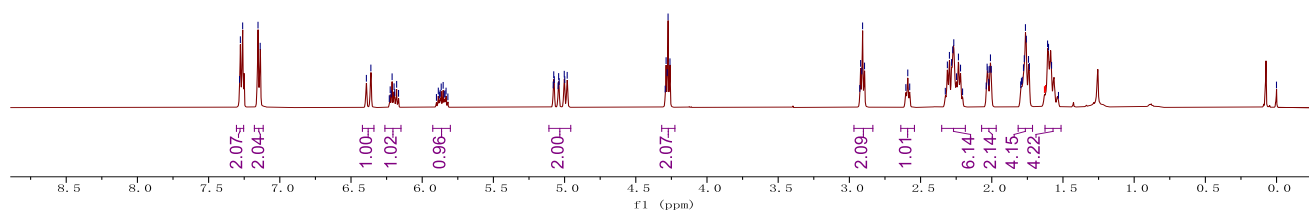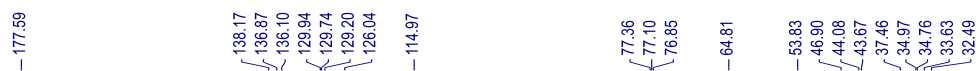

**28**,  $^{13}\text{C}$  NMR  
 $\text{CDCl}_3$

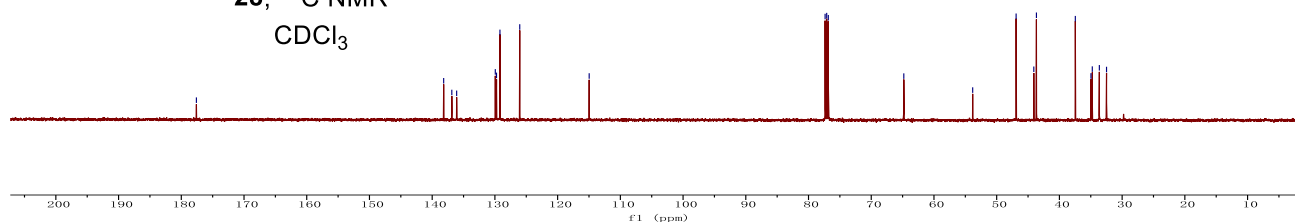

**Supplementary Fig. 82.**  $^1\text{H}$  NMR,  $^{13}\text{C}$  NMR and  $^{19}\text{F}$  NMR spectra of compound **28**.



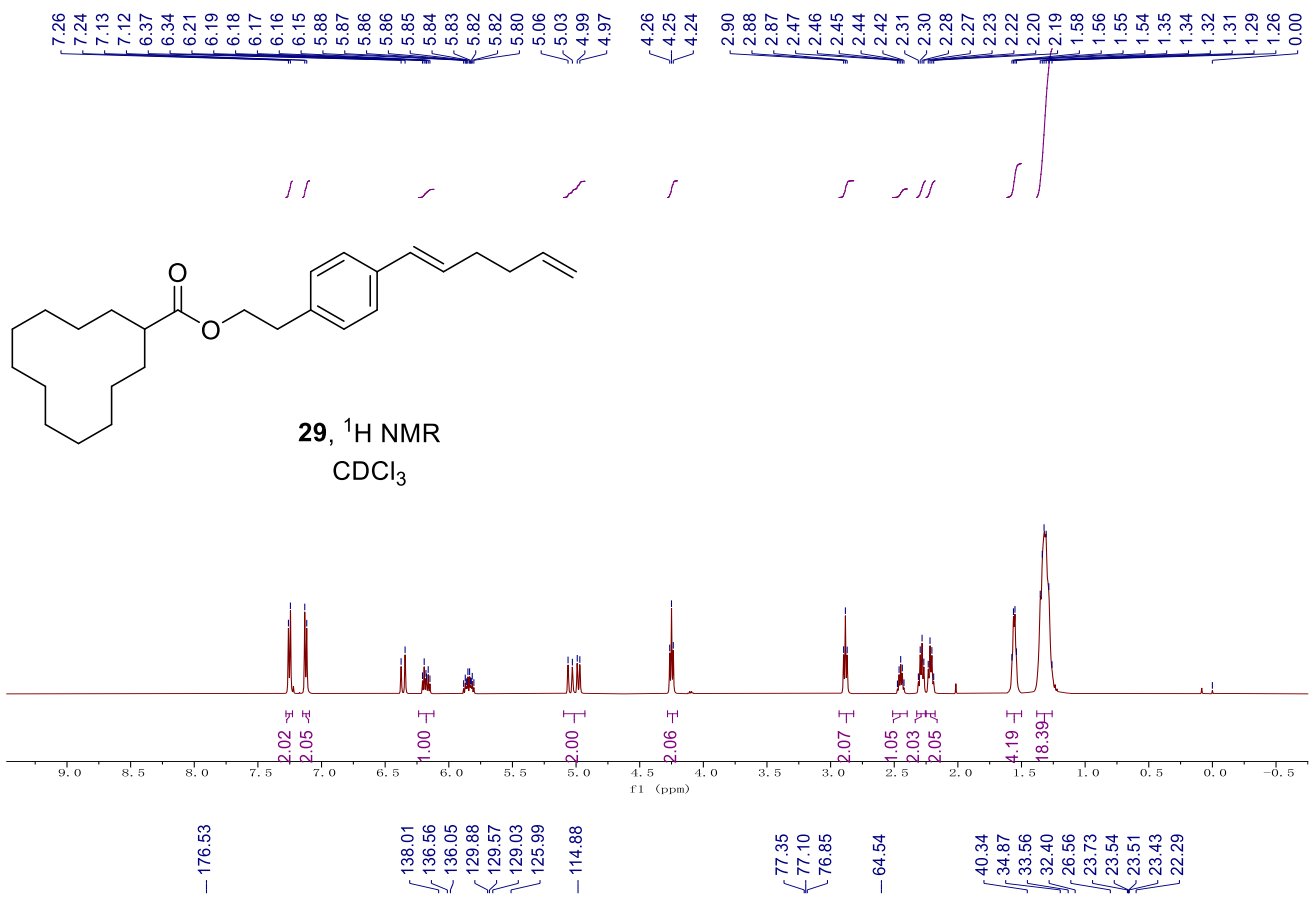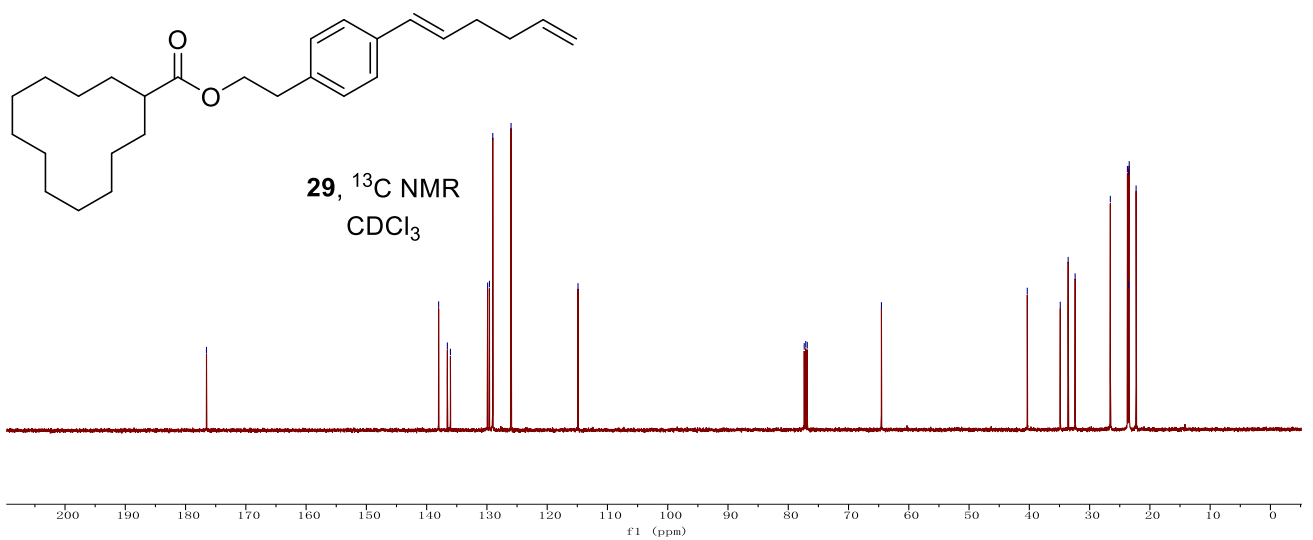

Supplementary Fig. 83.  $^1\text{H}$  NMR and  $^{13}\text{C}$  NMR spectra of compound **29**.

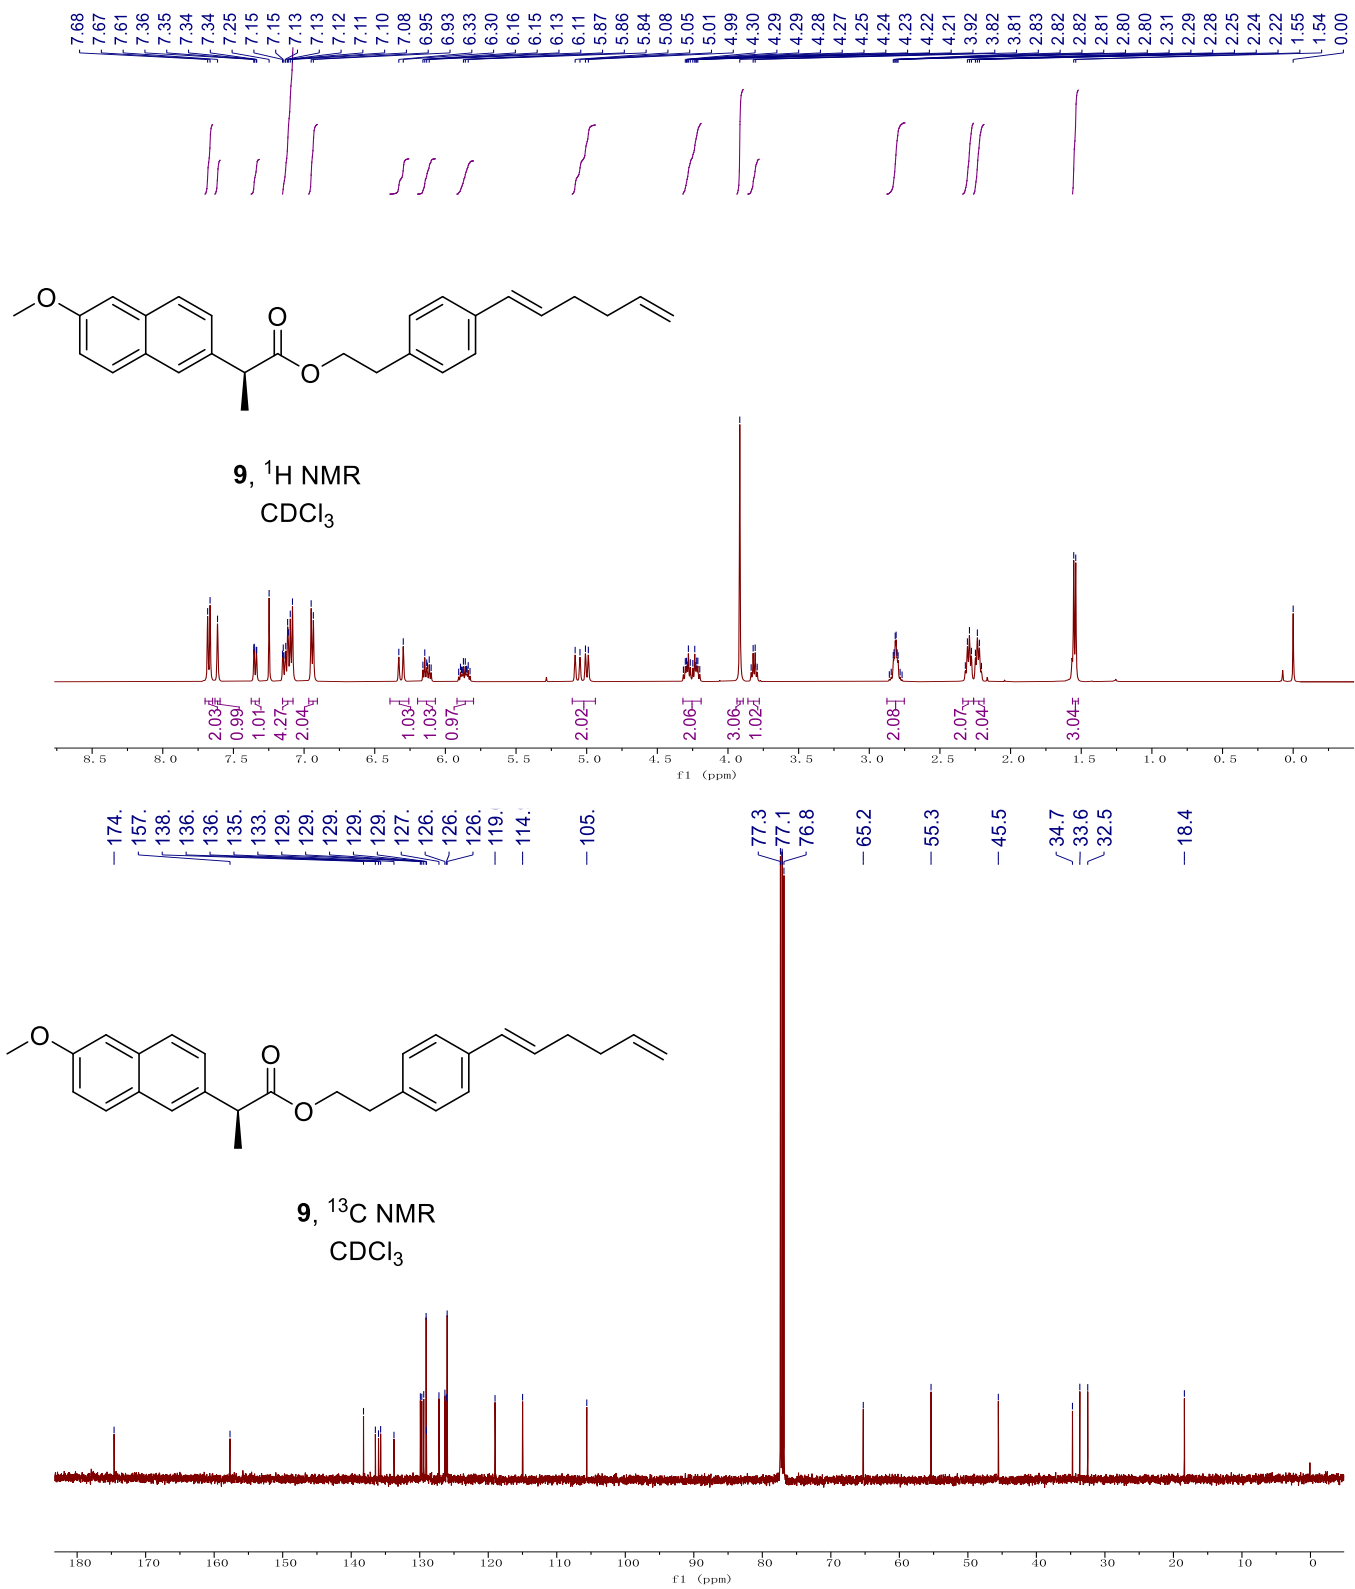

Supplementary Fig. 84. <sup>1</sup>H NMR and <sup>13</sup>C NMR spectra of compound 9.

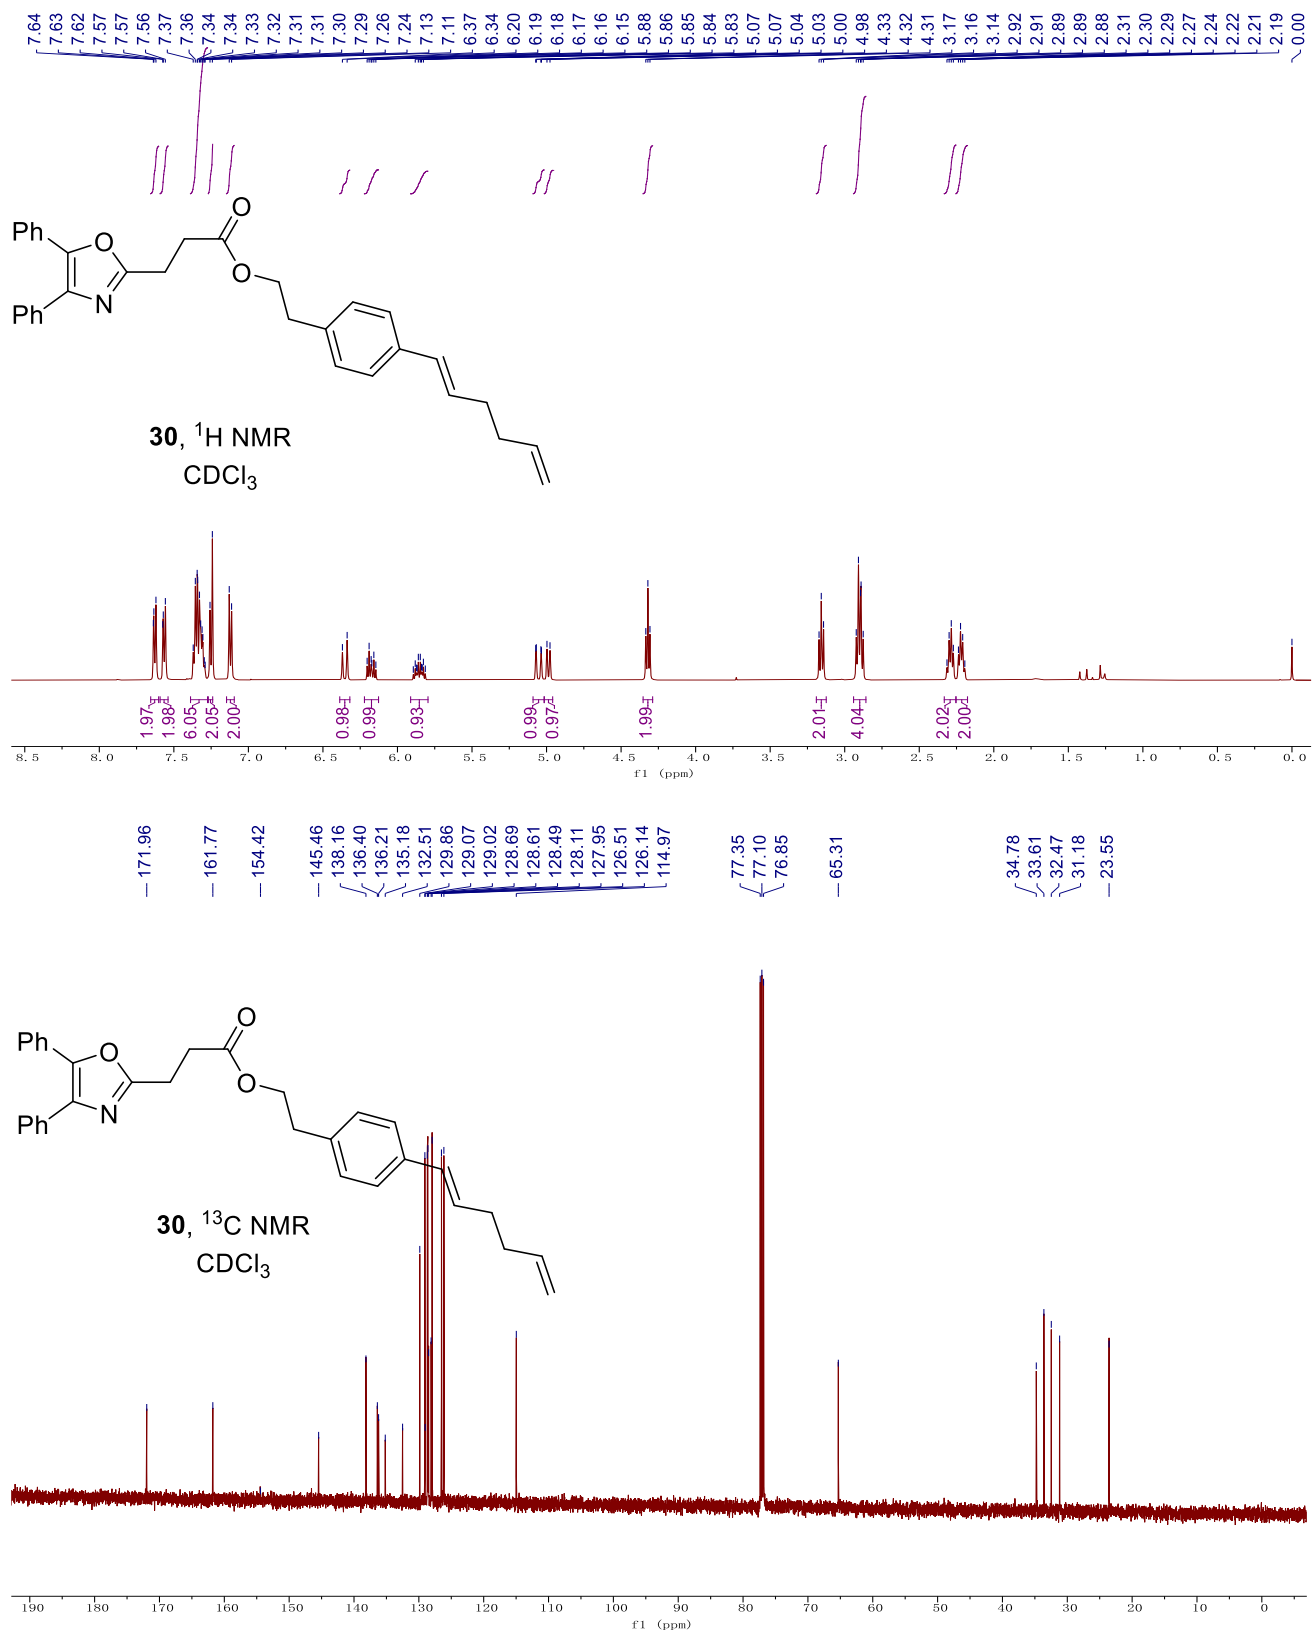

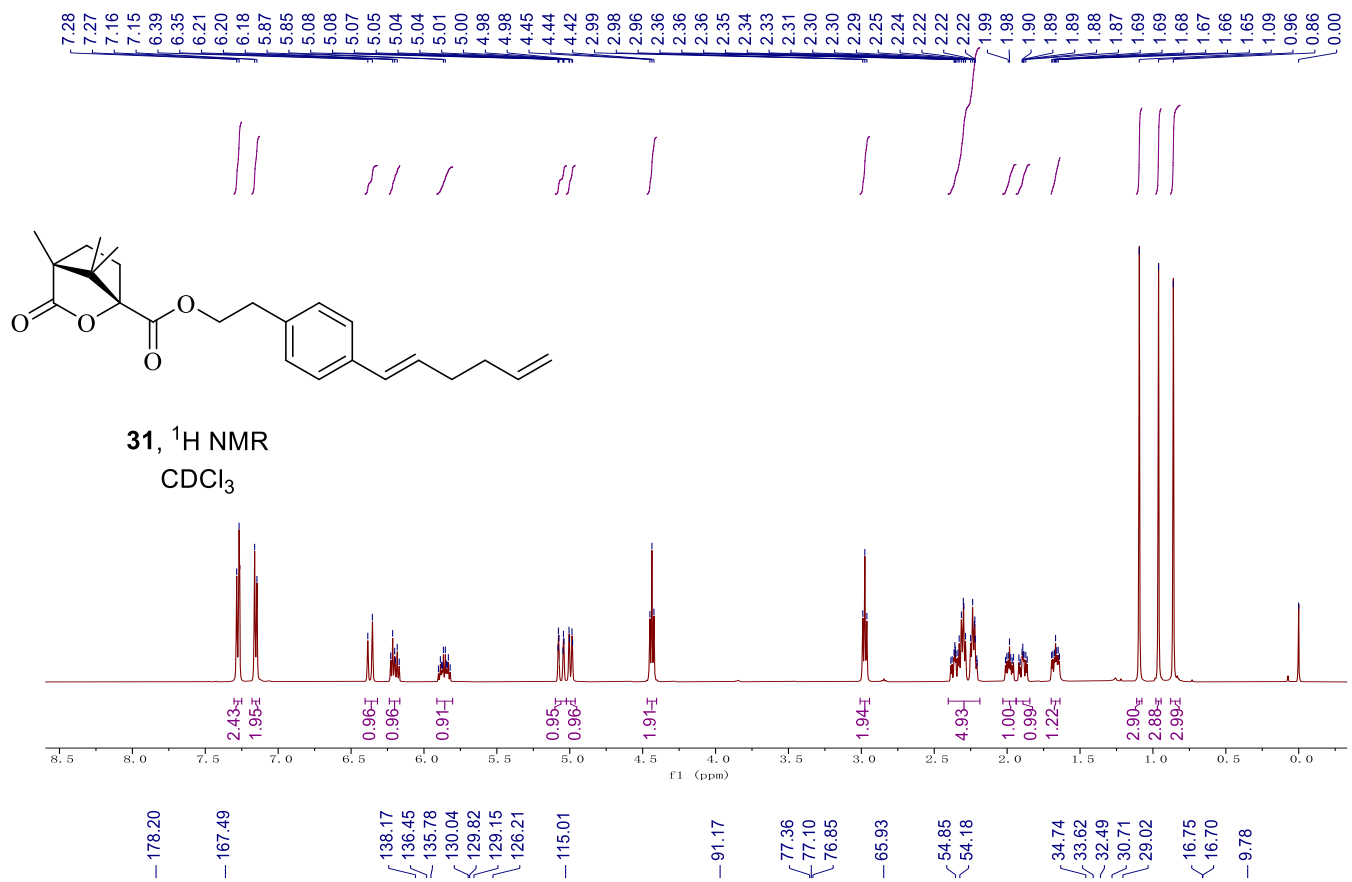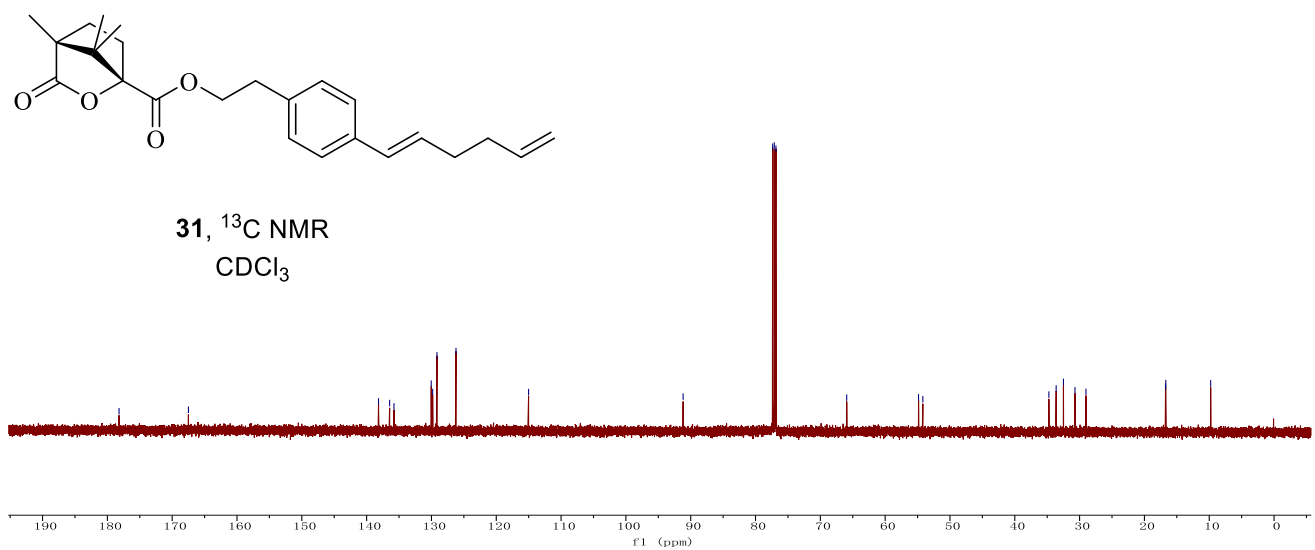

**Supplementary Fig. 86.** <sup>1</sup>H NMR and <sup>13</sup>C NMR spectra of compound **31**.

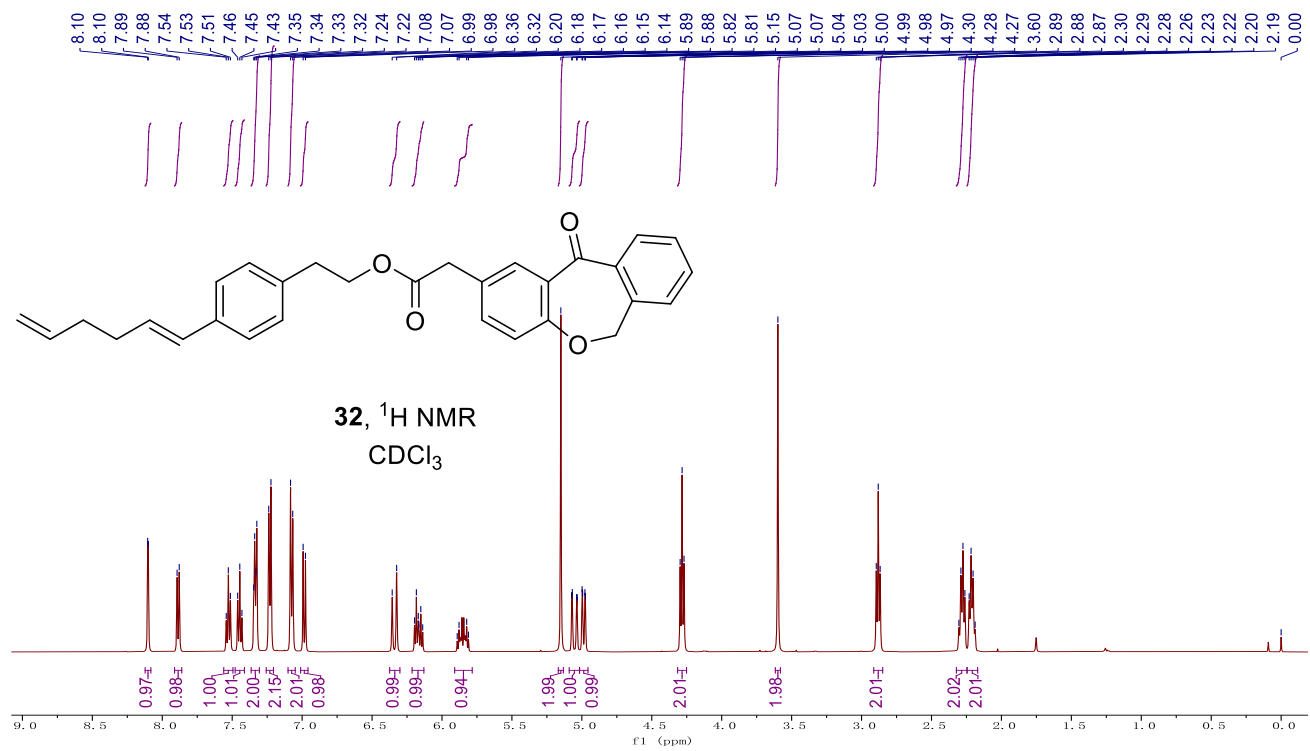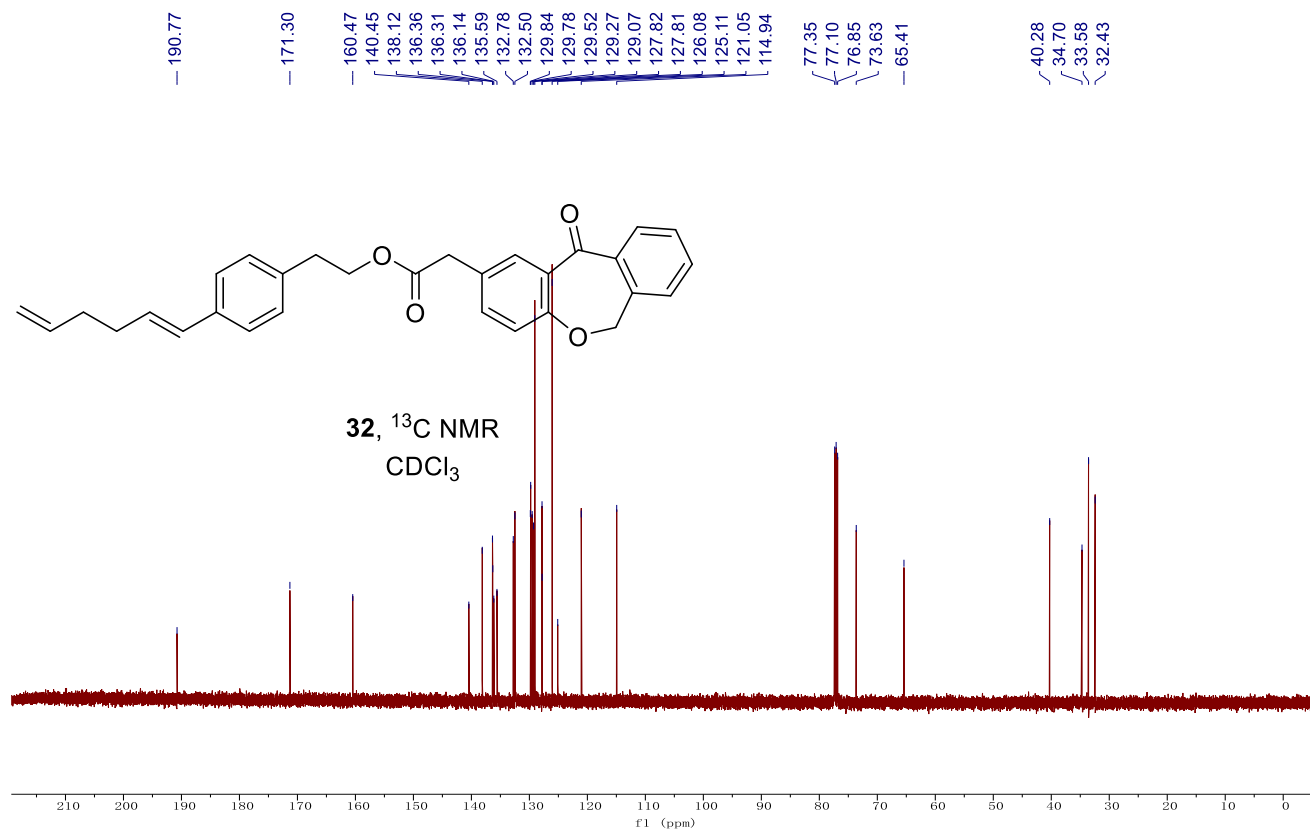

Supplementary Fig. 87.  $^1\text{H NMR}$  and  $^{13}\text{C NMR}$  spectra of compound **32**.

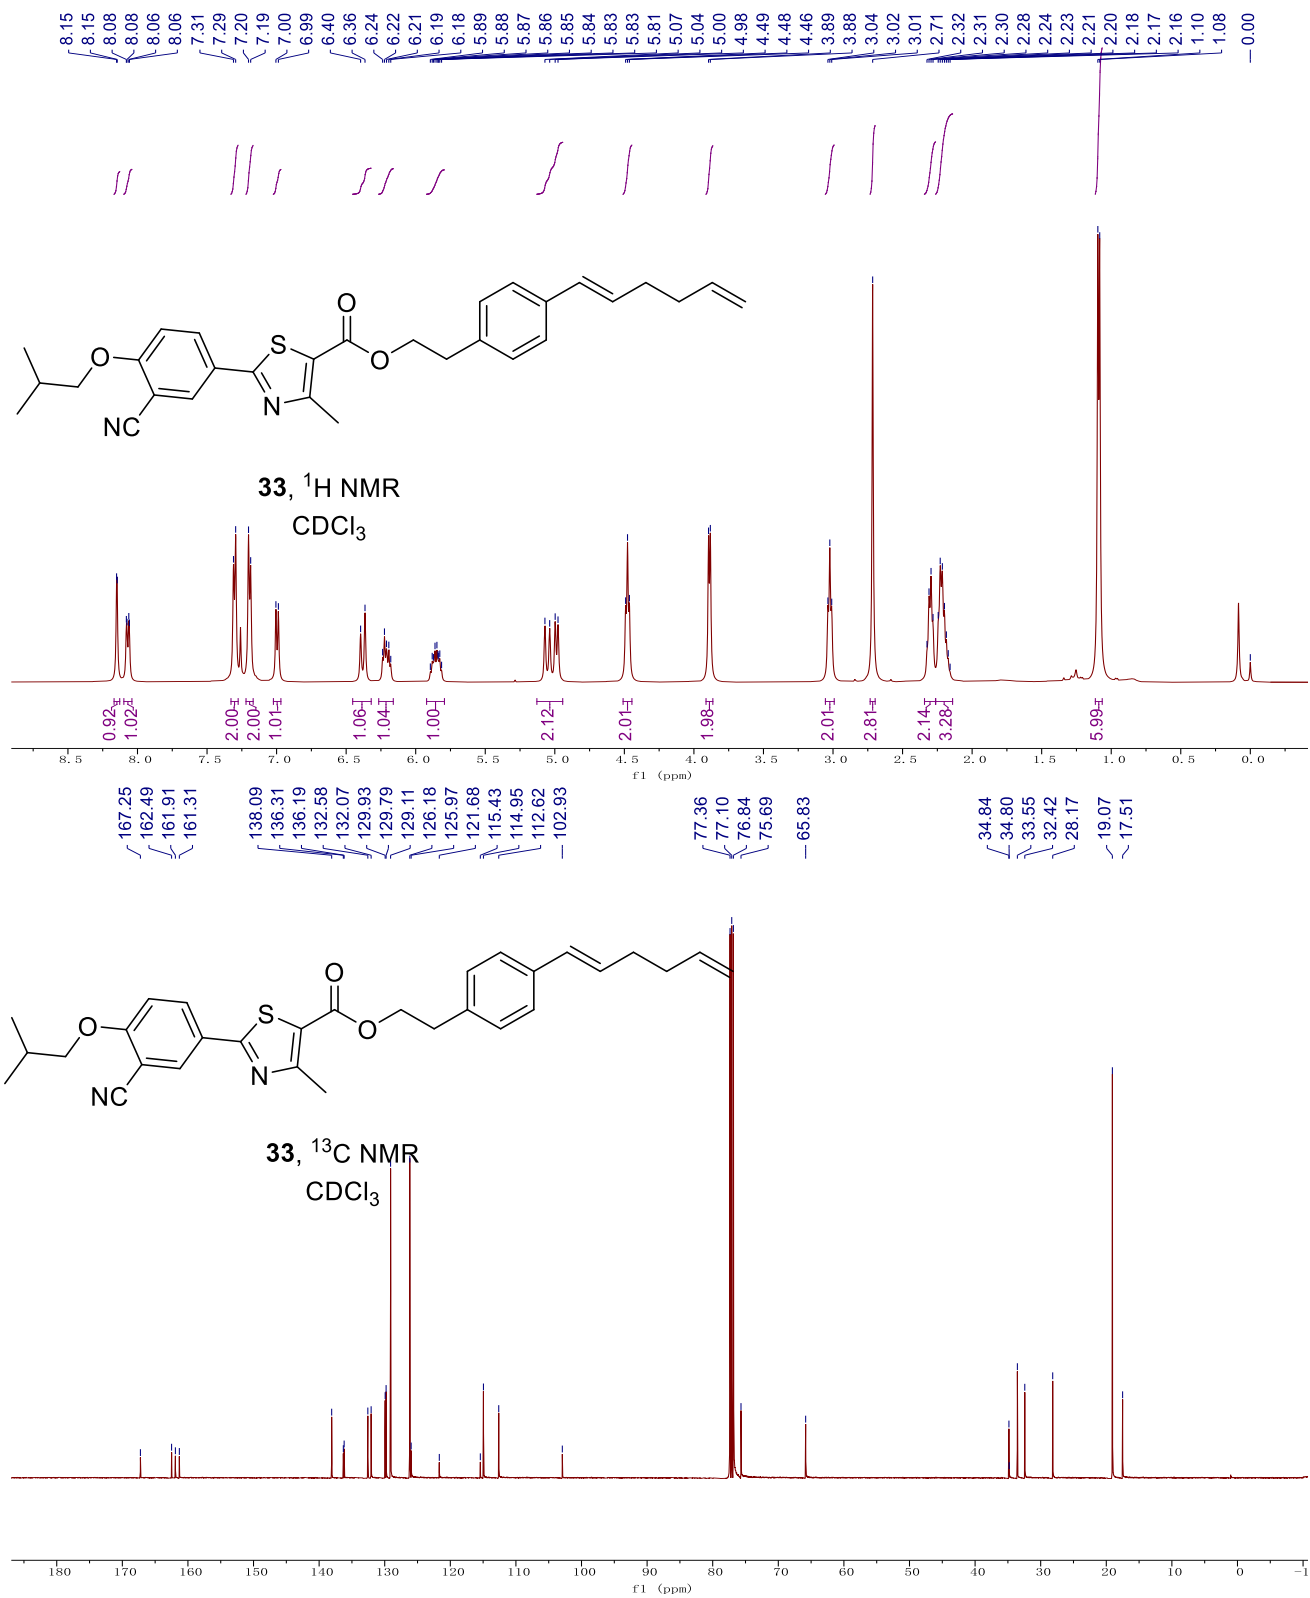

**Supplementary Fig. 88.**  $^1\text{H NMR}$  and  $^{13}\text{C NMR}$  spectra of compound **33**.

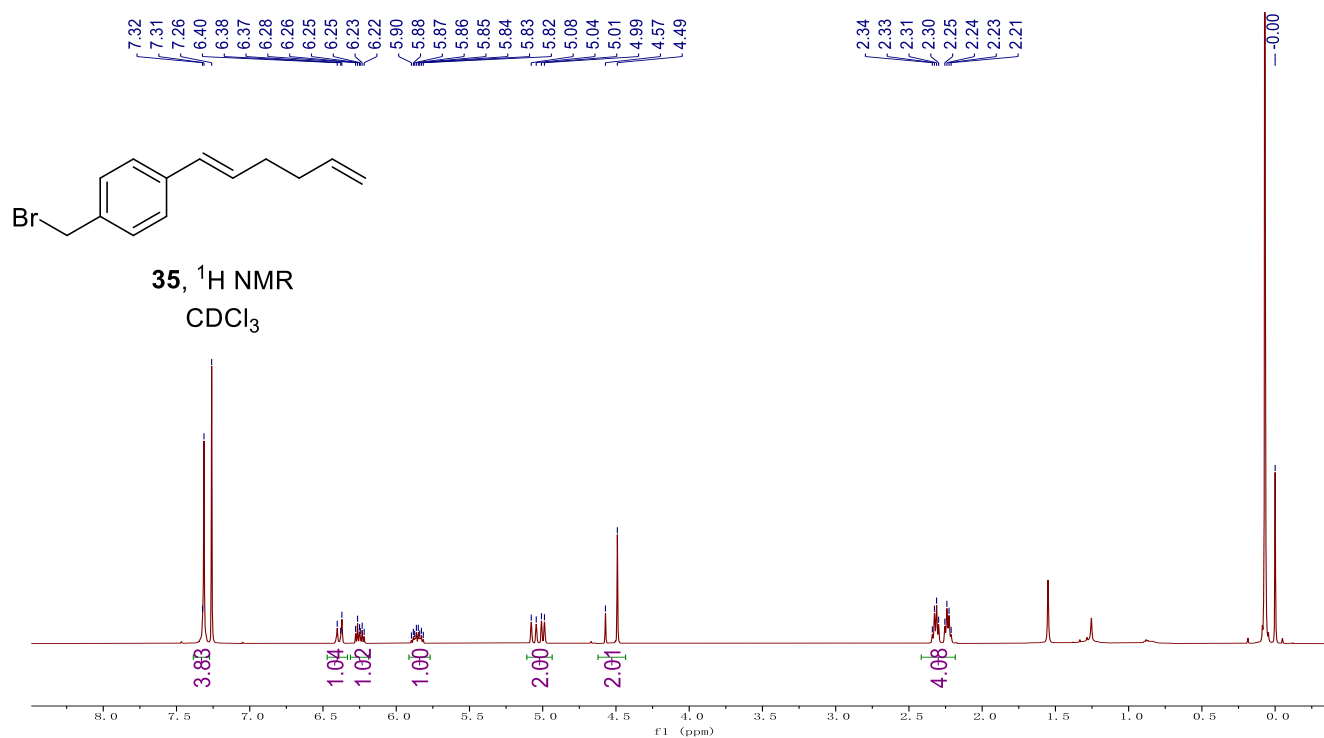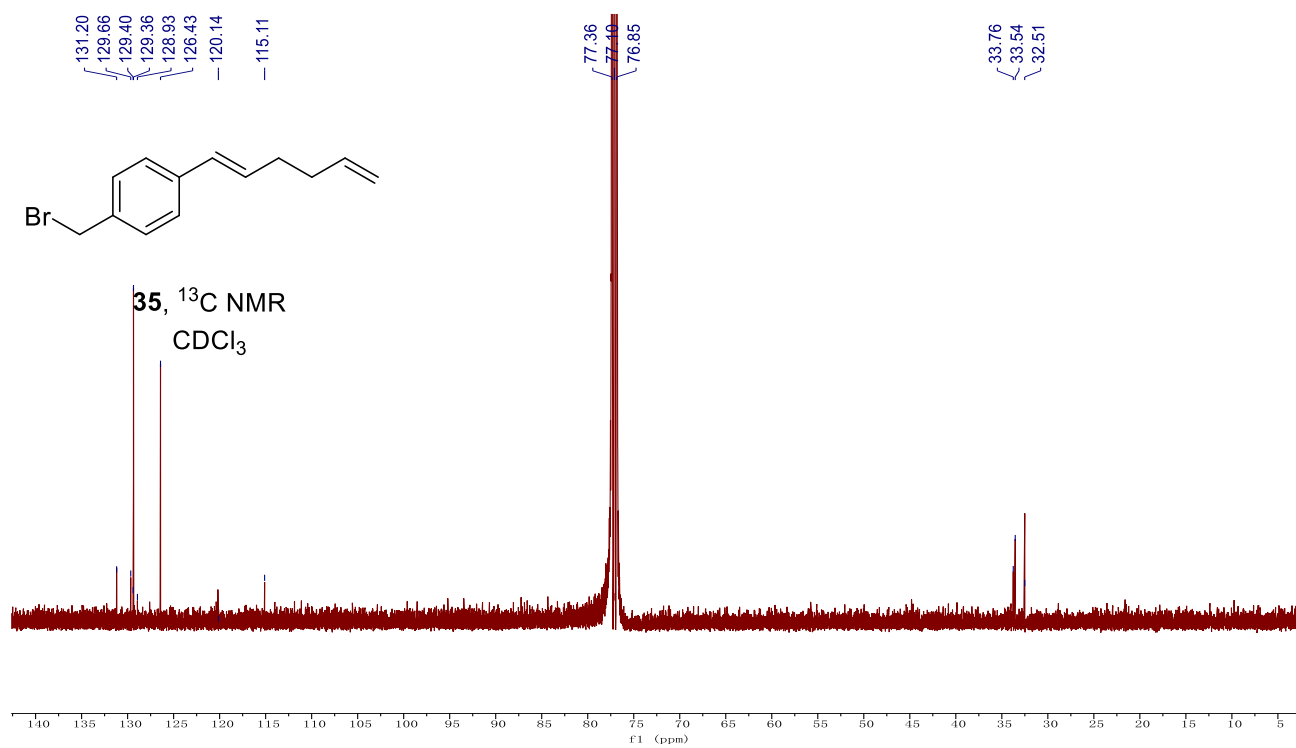

**Supplementary Fig. 89.**  $^1\text{H}$  NMR and  $^{13}\text{C}$  NMR spectra of compound **35**.

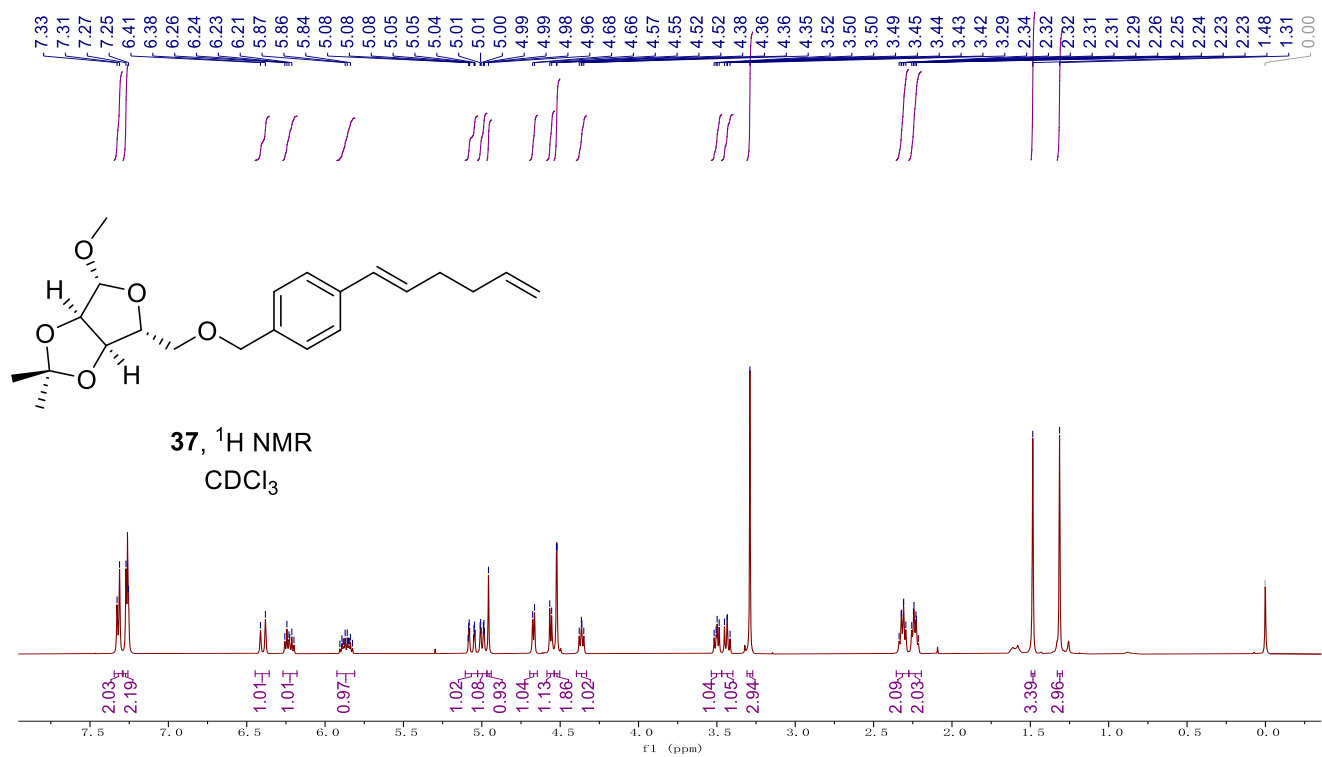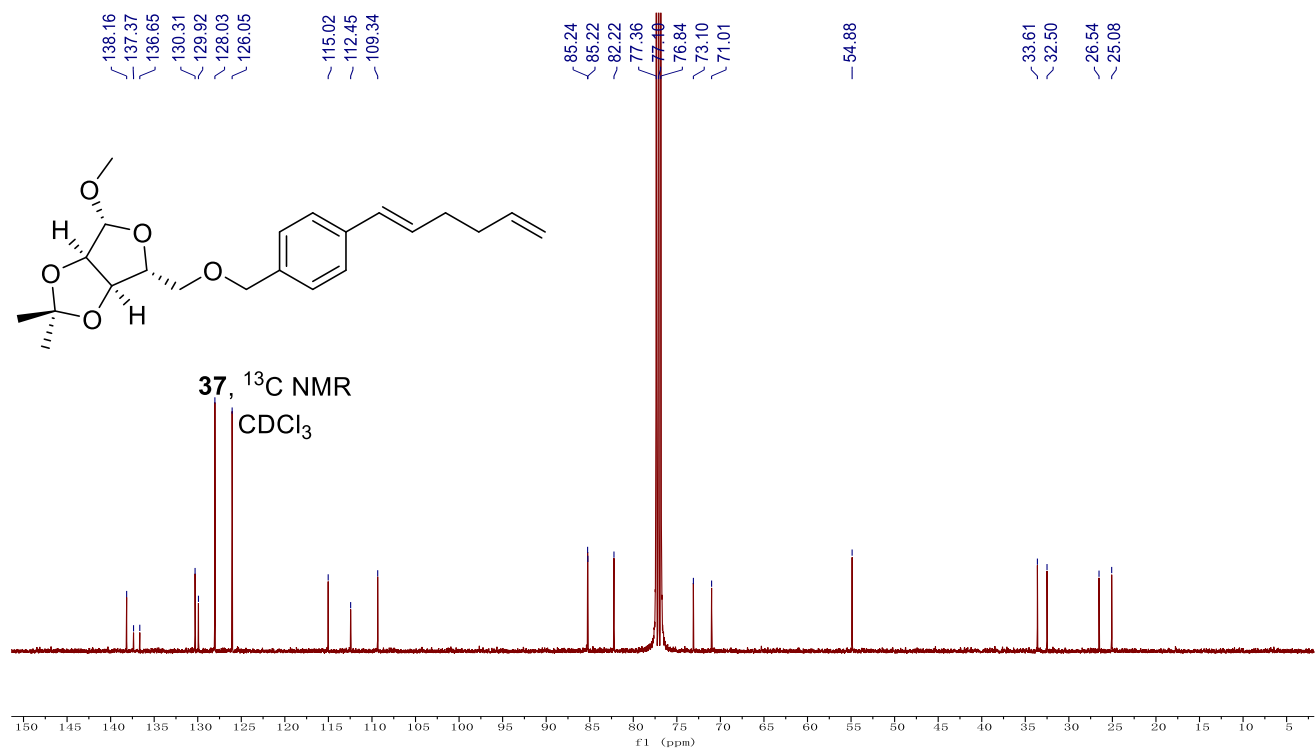

Supplementary Fig. 90. <sup>1</sup>H NMR and <sup>13</sup>C NMR spectra of compound 37.



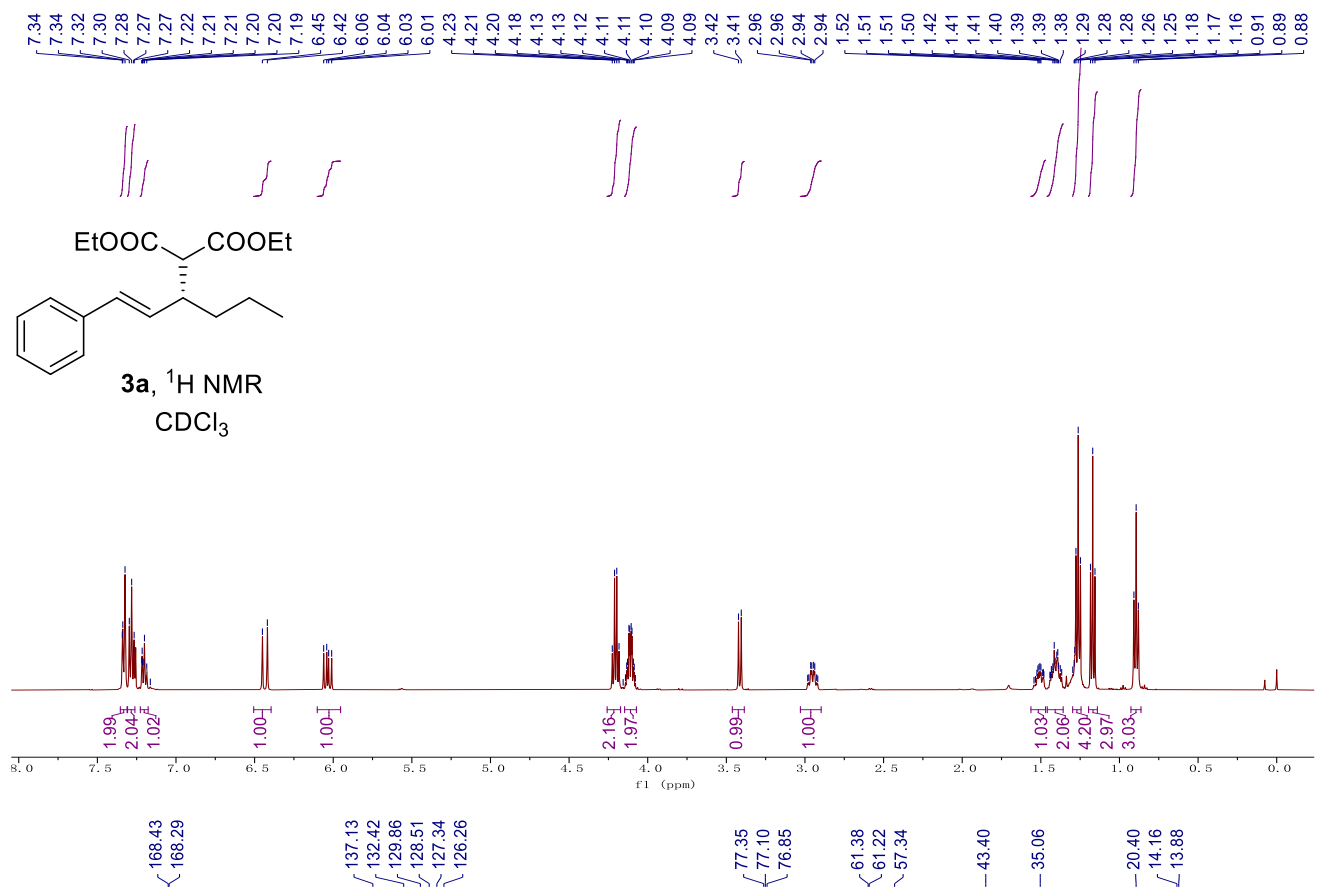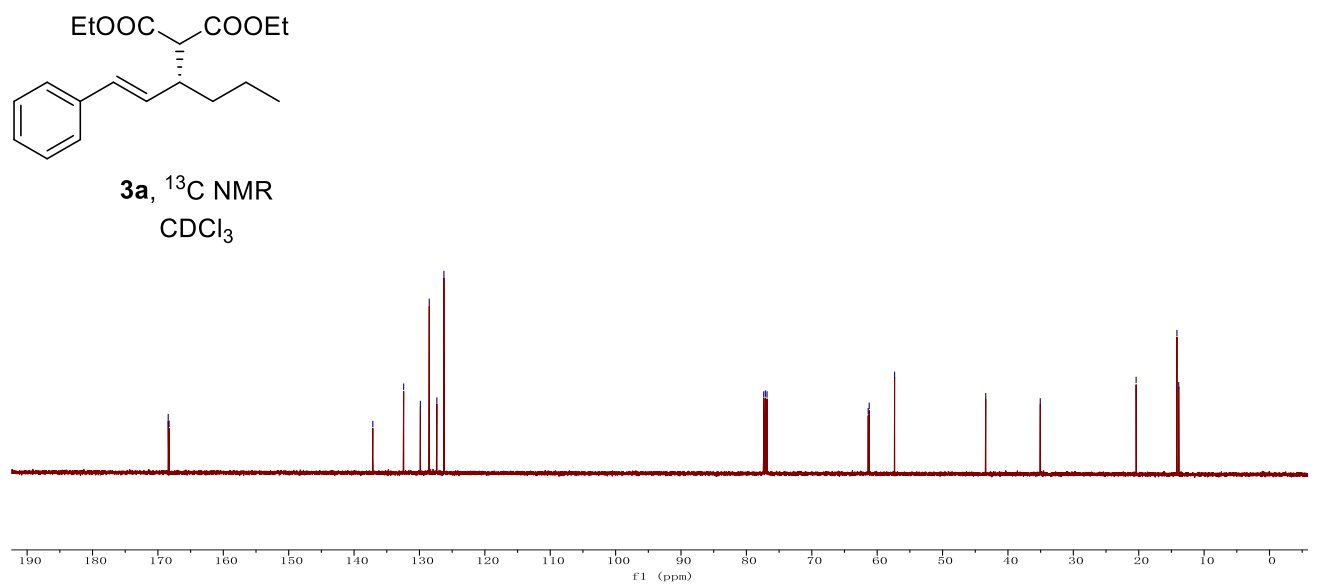

Supplementary Fig. 91.  $^1\text{H NMR}$  and  $^{13}\text{C NMR}$  spectra of compound **3a**.

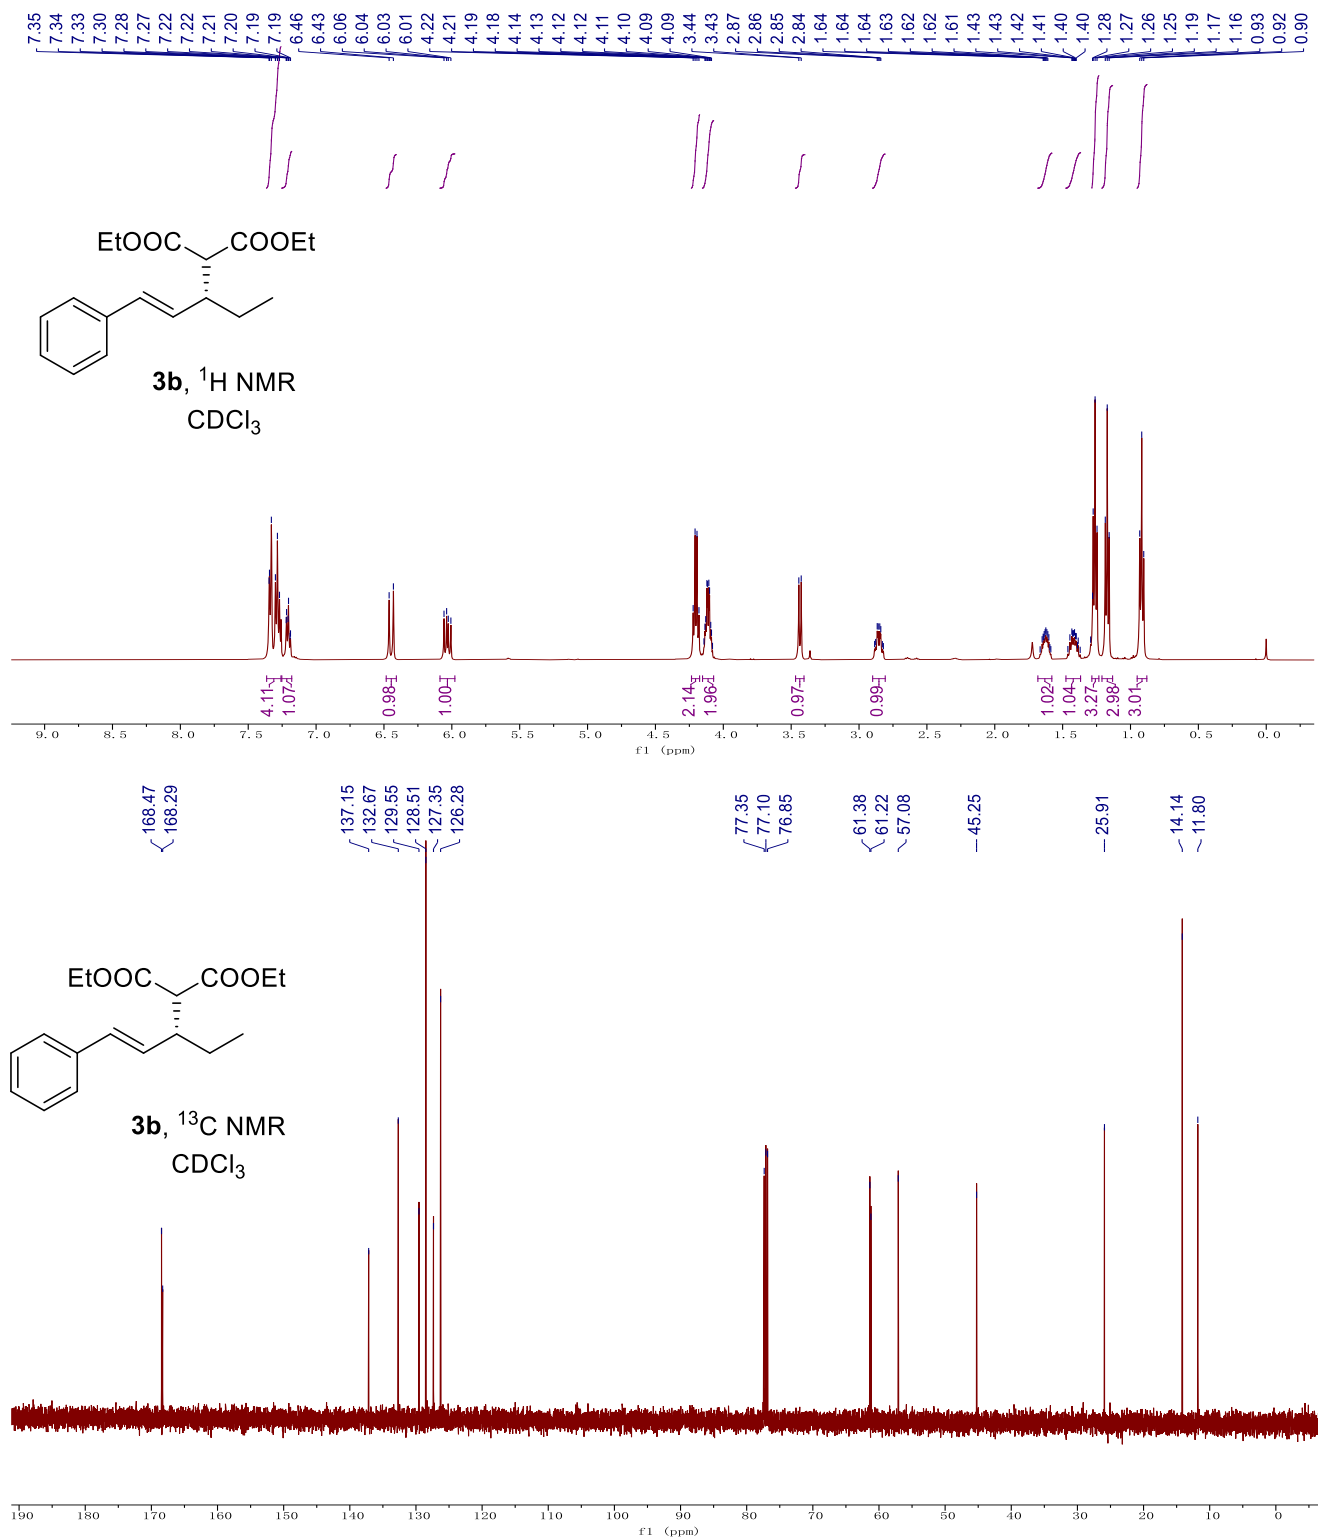

Supplementary Fig. 92.  $^1\text{H}$  NMR and  $^{13}\text{C}$  NMR spectra of compound **3b**.

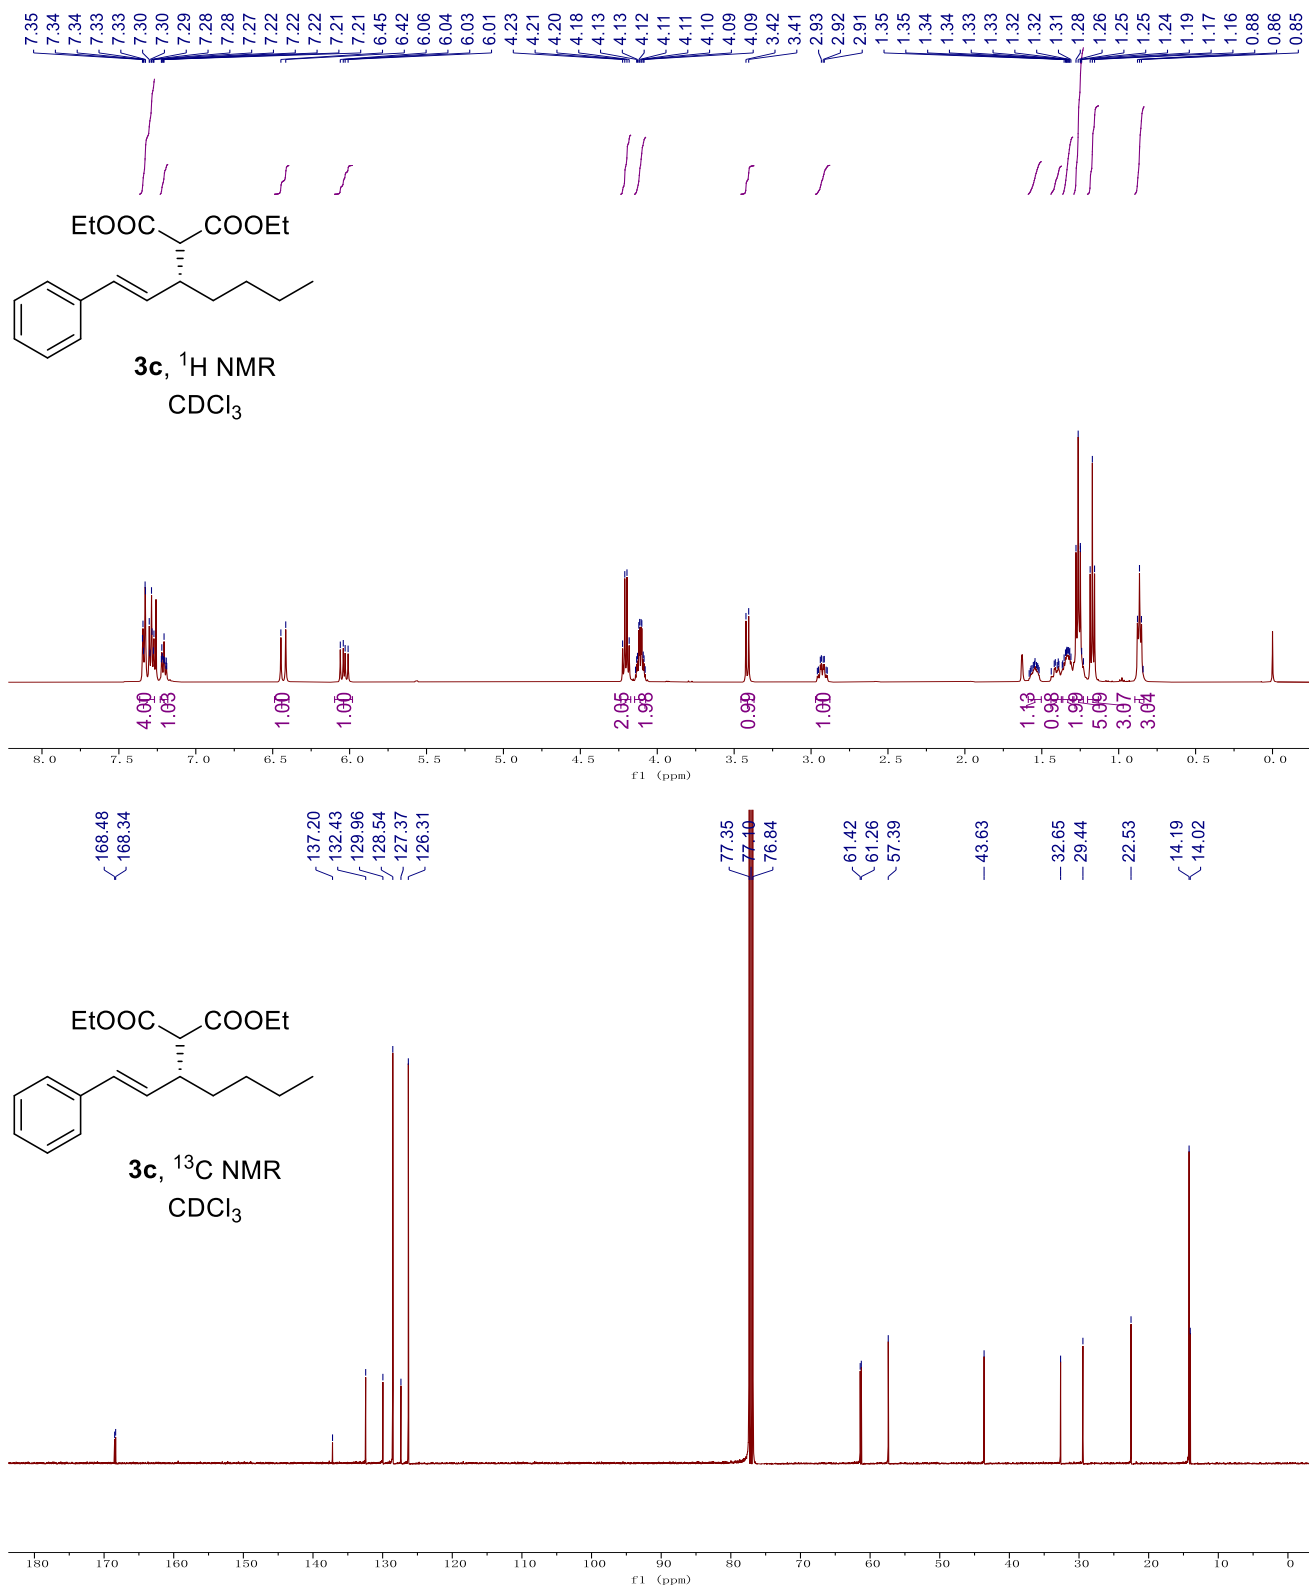

Supplementary Fig. 93.  $^1\text{H NMR}$  and  $^{13}\text{C NMR}$  spectra of compound **3c**.

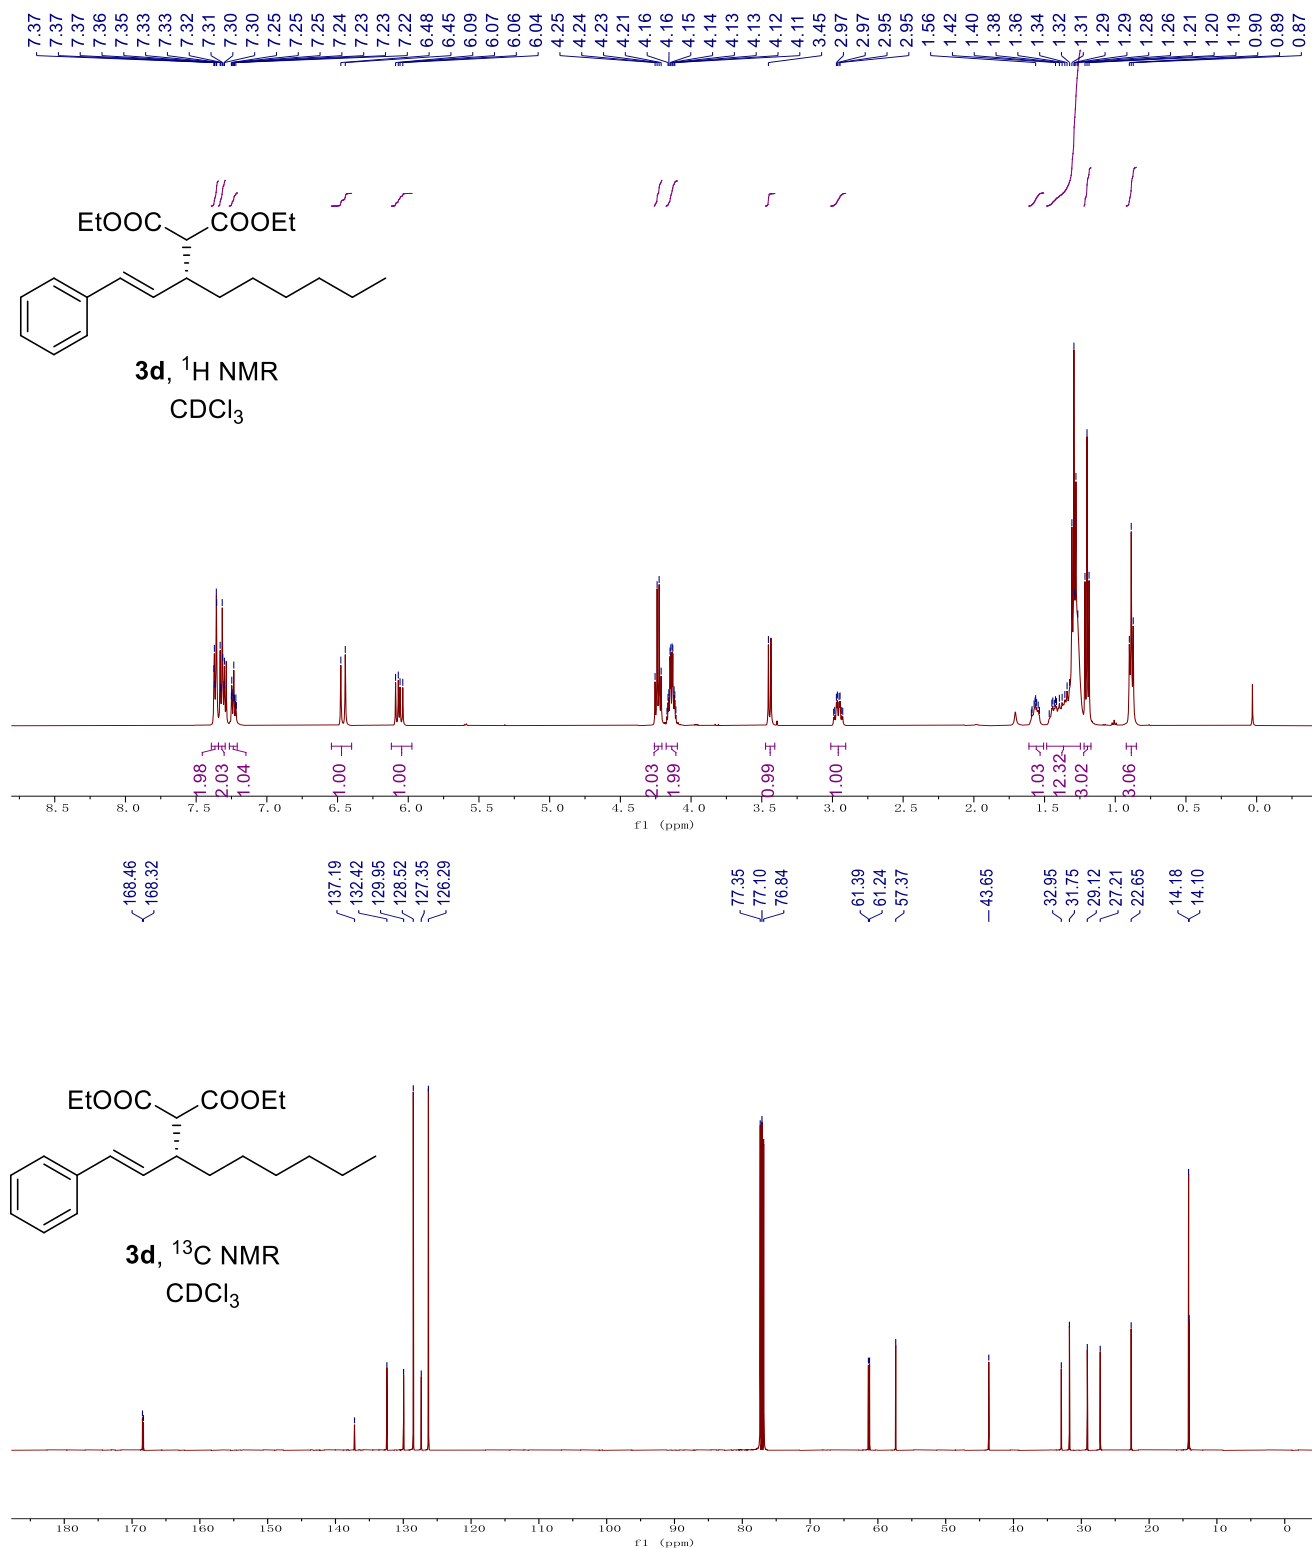

**Supplementary Fig. 94.** <sup>1</sup>H NMR and <sup>13</sup>C NMR spectra of compound **3d**.

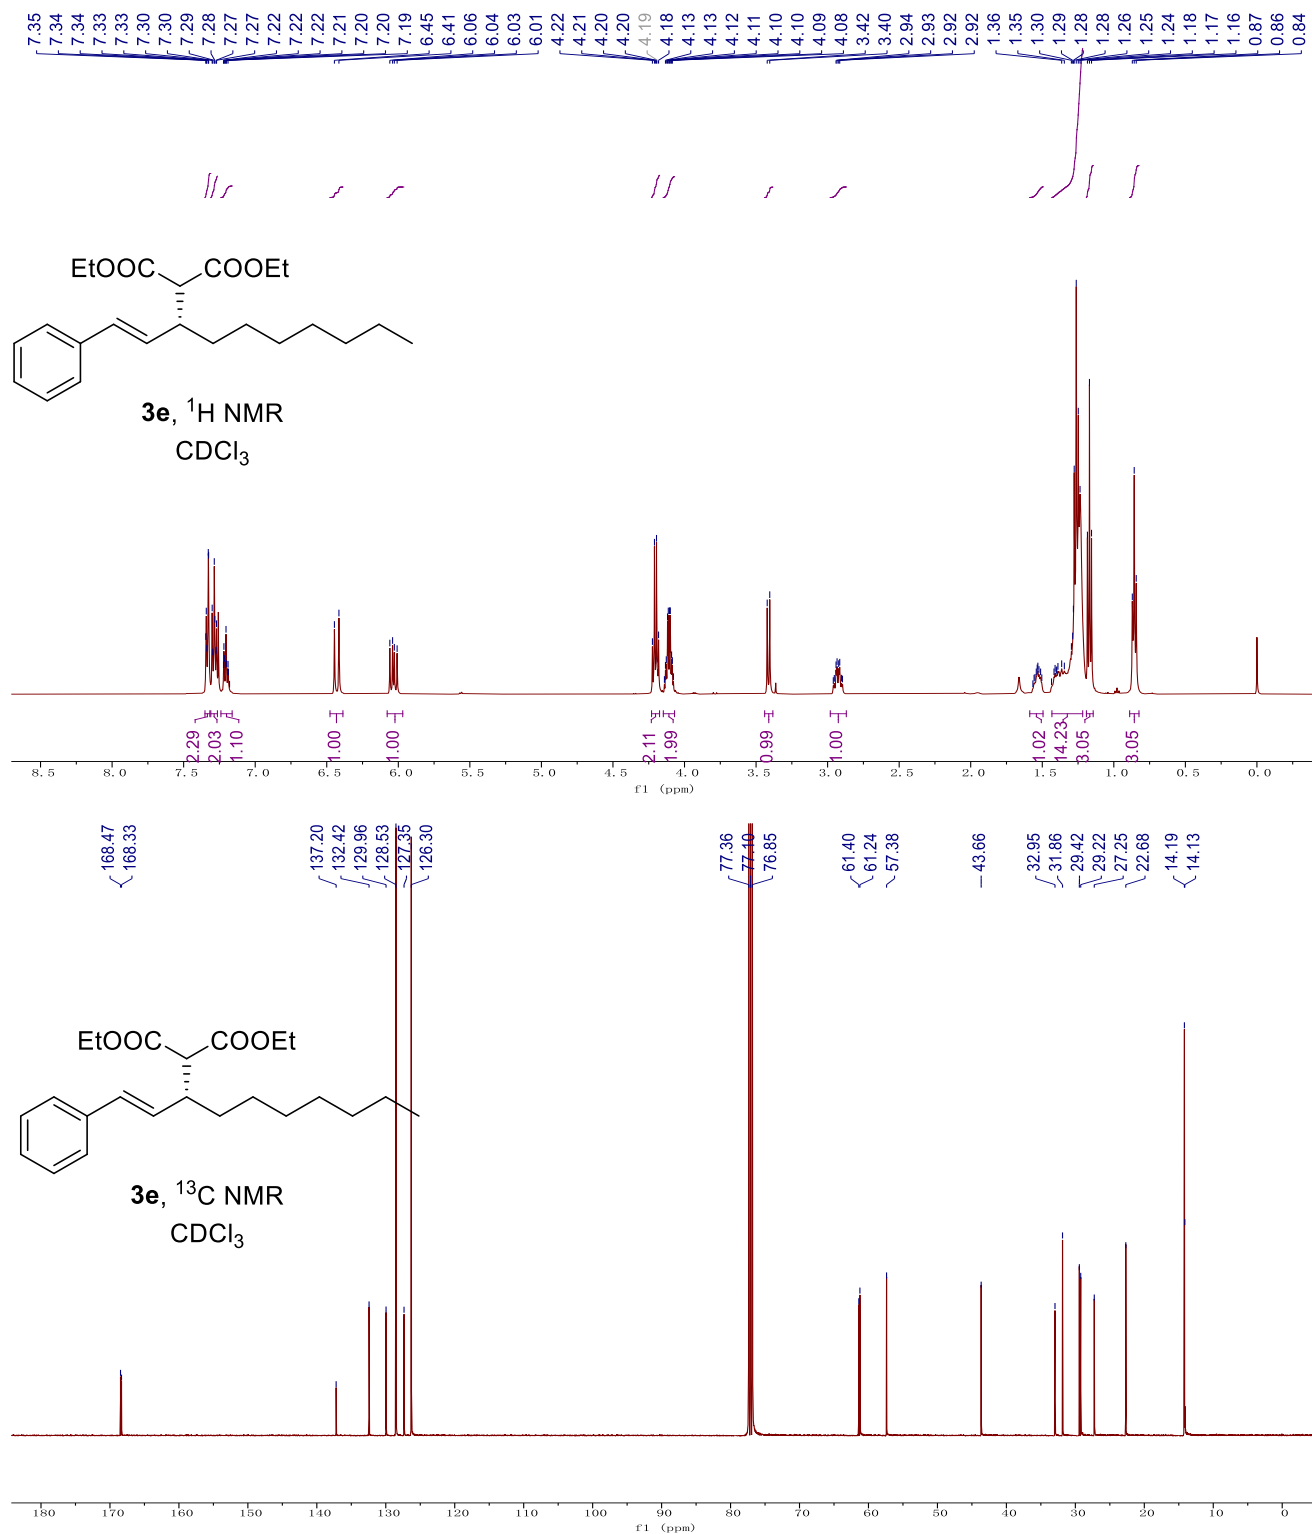

Supplementary Fig. 95.  $^1\text{H}$  NMR and  $^{13}\text{C}$  NMR spectra of compound **3e**.

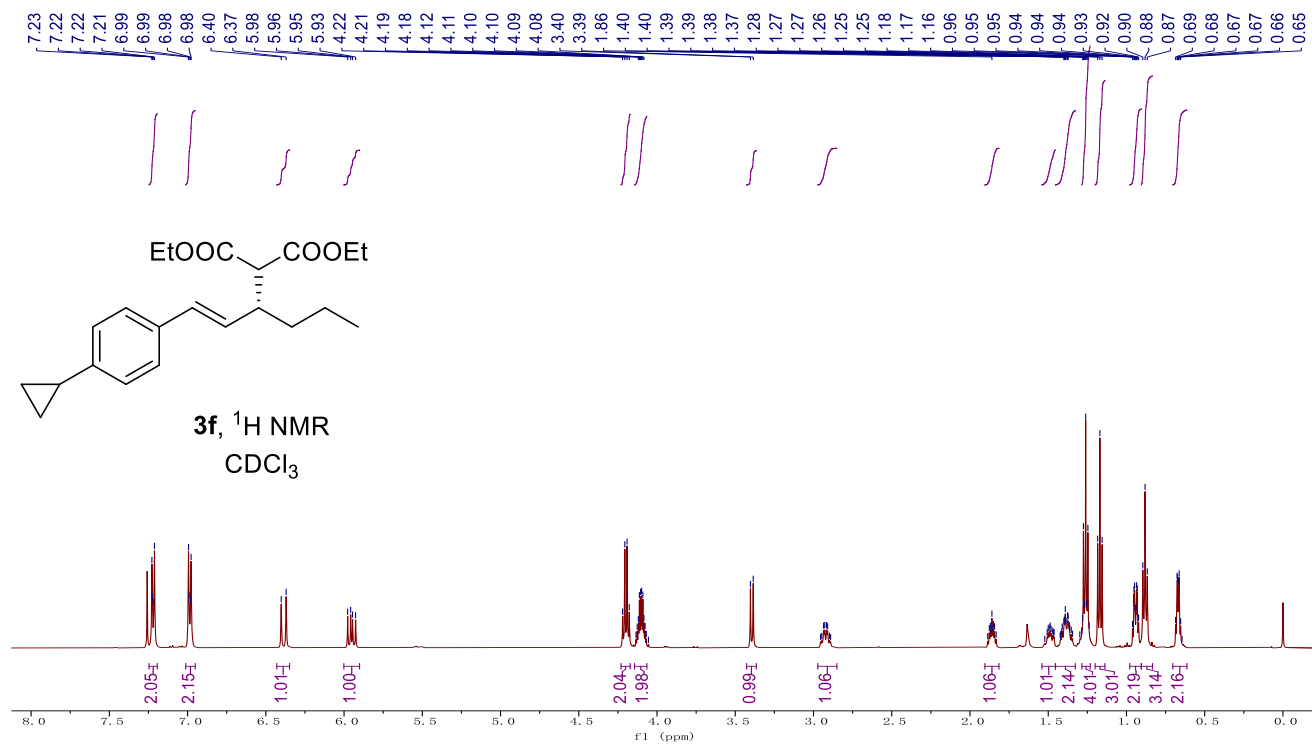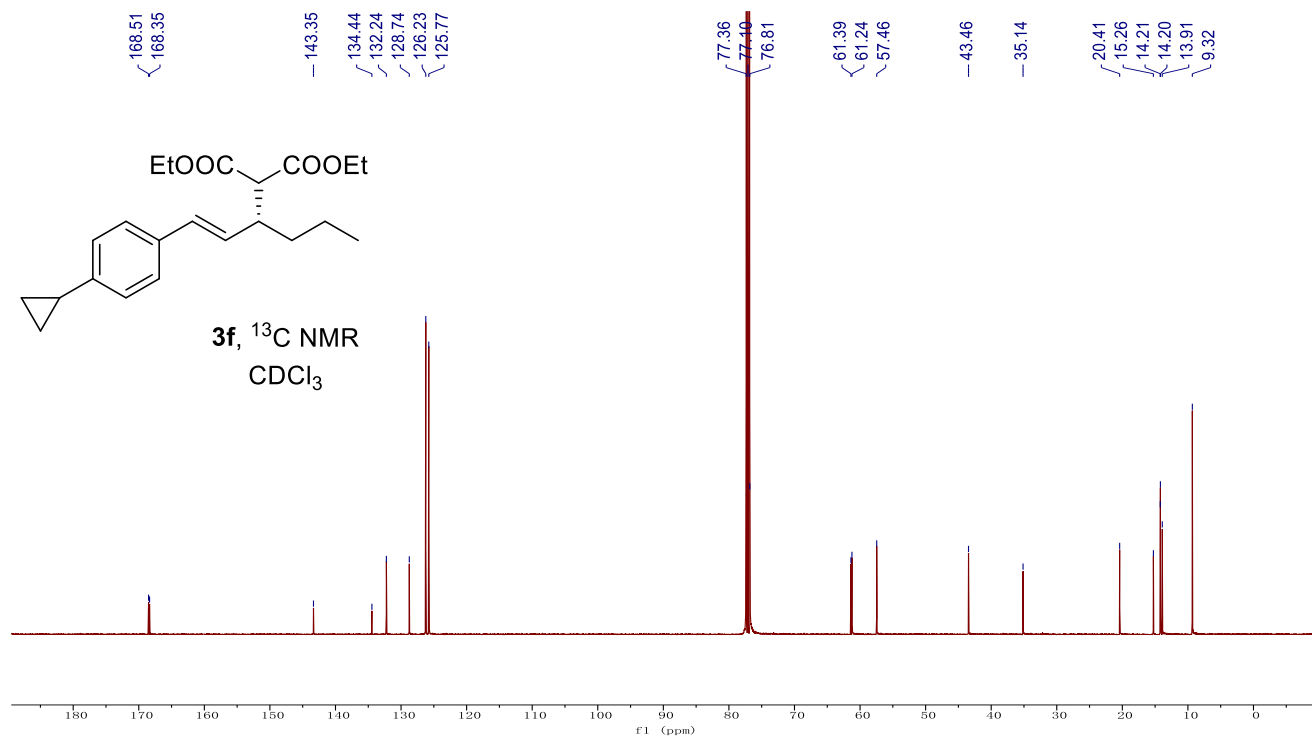

Supplementary Fig. 96.  $^1\text{H}$  NMR and  $^{13}\text{C}$  NMR spectra of compound **3f**.

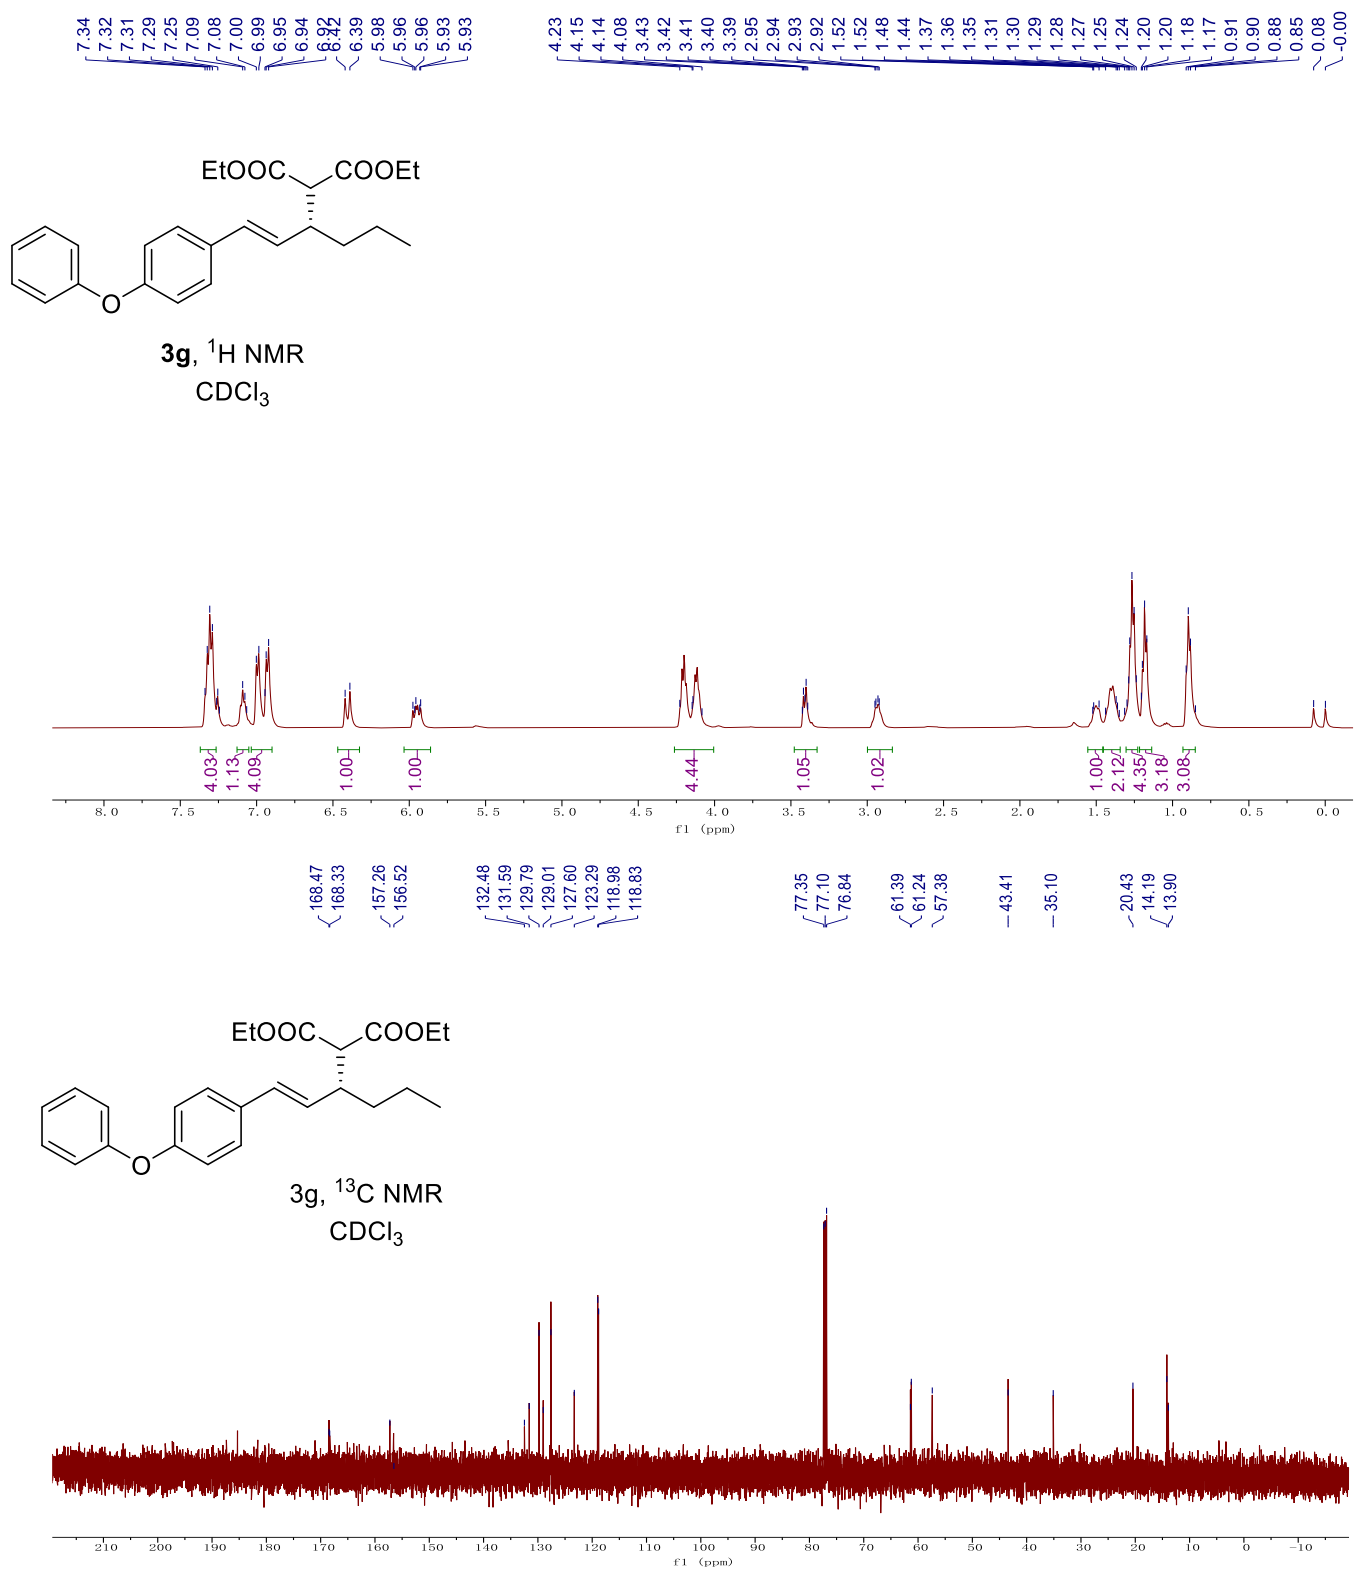

Supplementary Fig. 97.  $^1\text{H NMR}$  and  $^{13}\text{C NMR}$  spectra of compound **3g**.

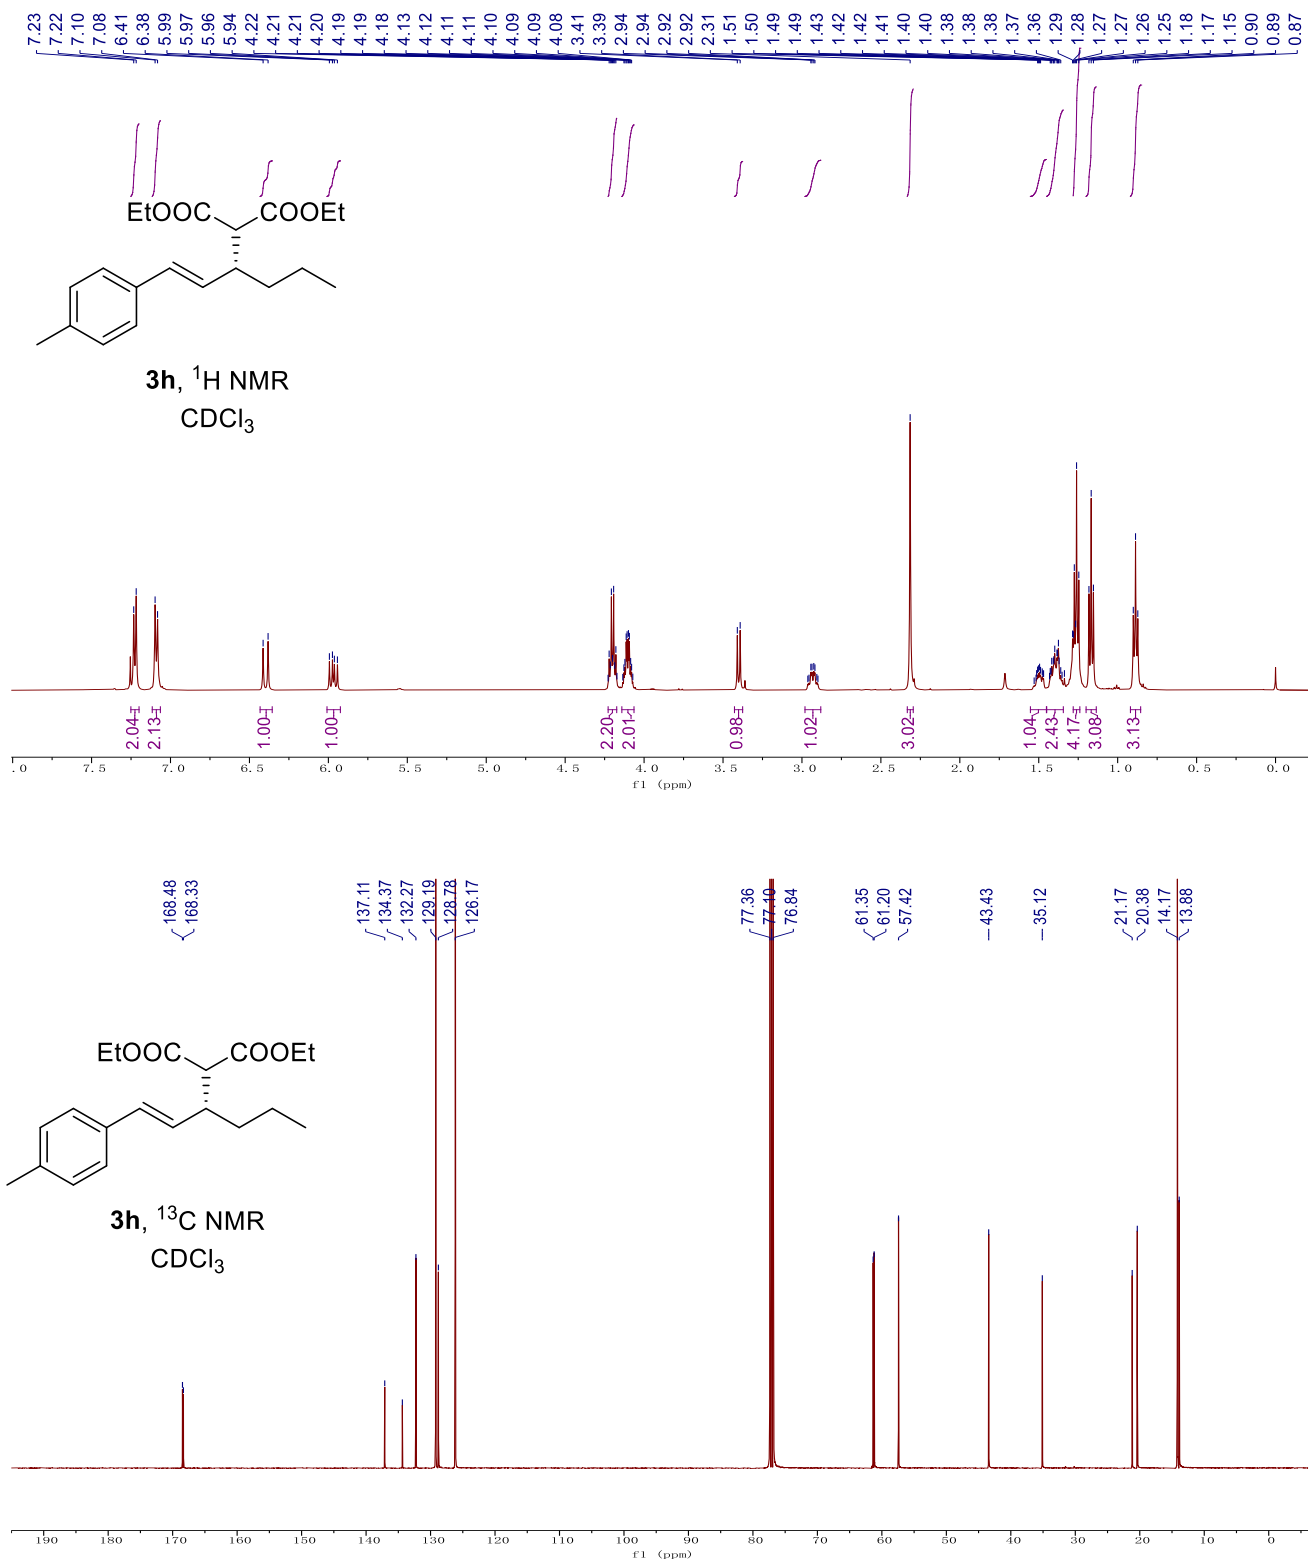

Supplementary Fig. 98.  $^1\text{H NMR}$  and  $^{13}\text{C NMR}$  spectra of compound **3h**.



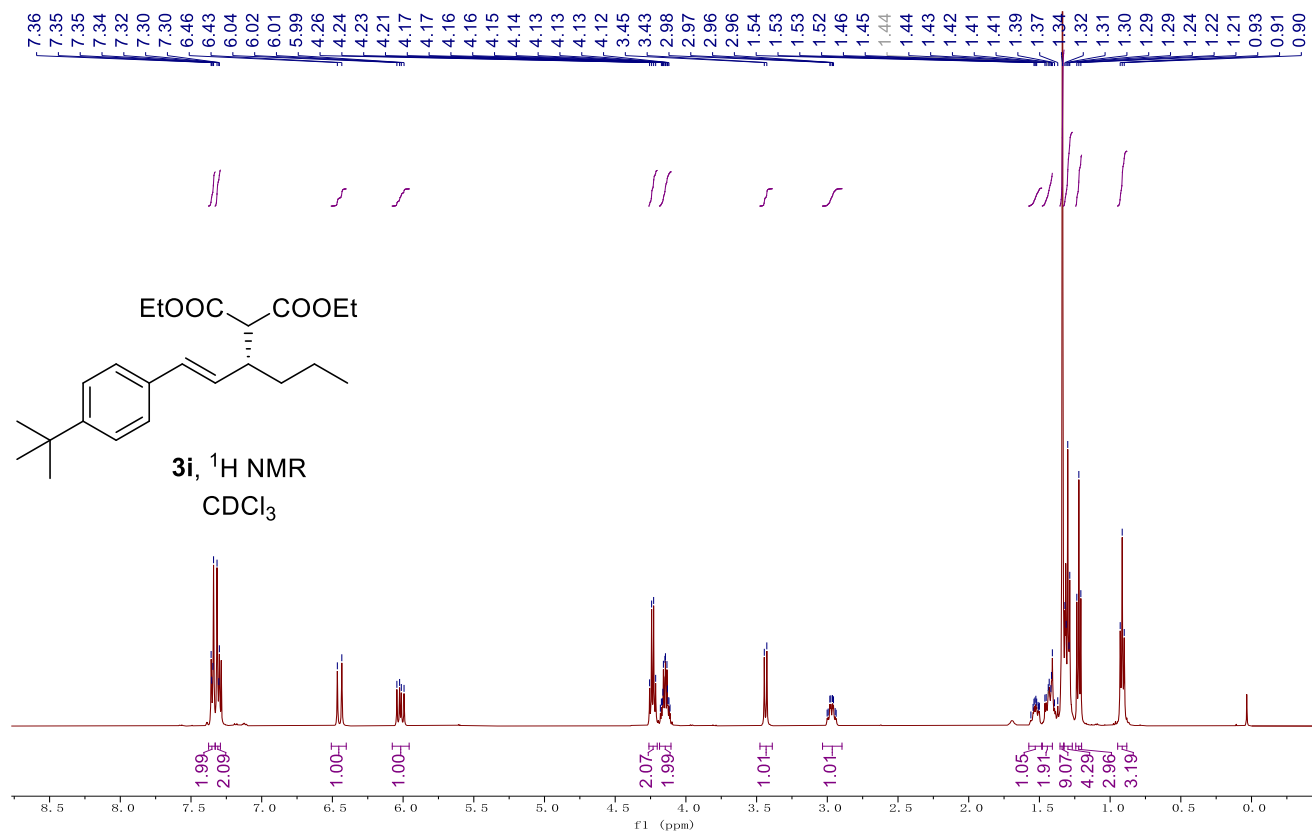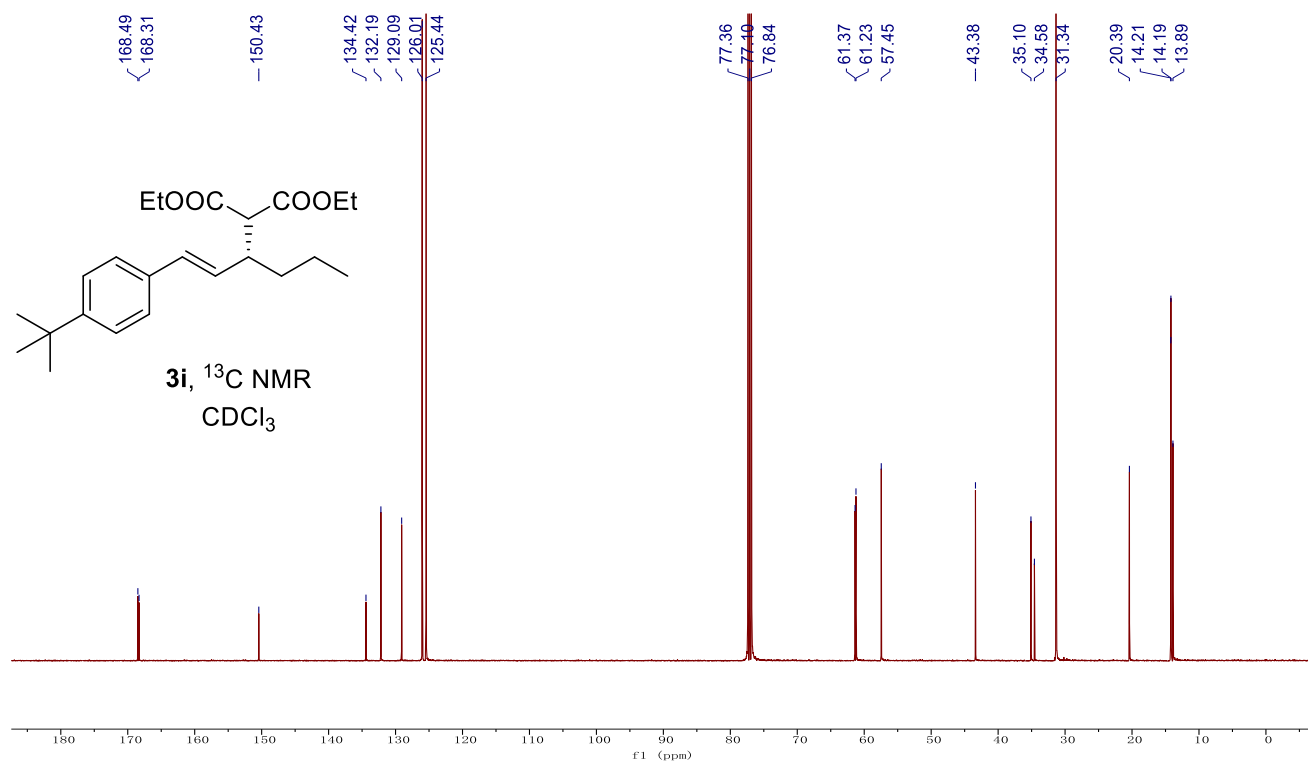

**Supplementary Fig. 99.** <sup>1</sup>H NMR and <sup>13</sup>C NMR spectra of compound **3i**.

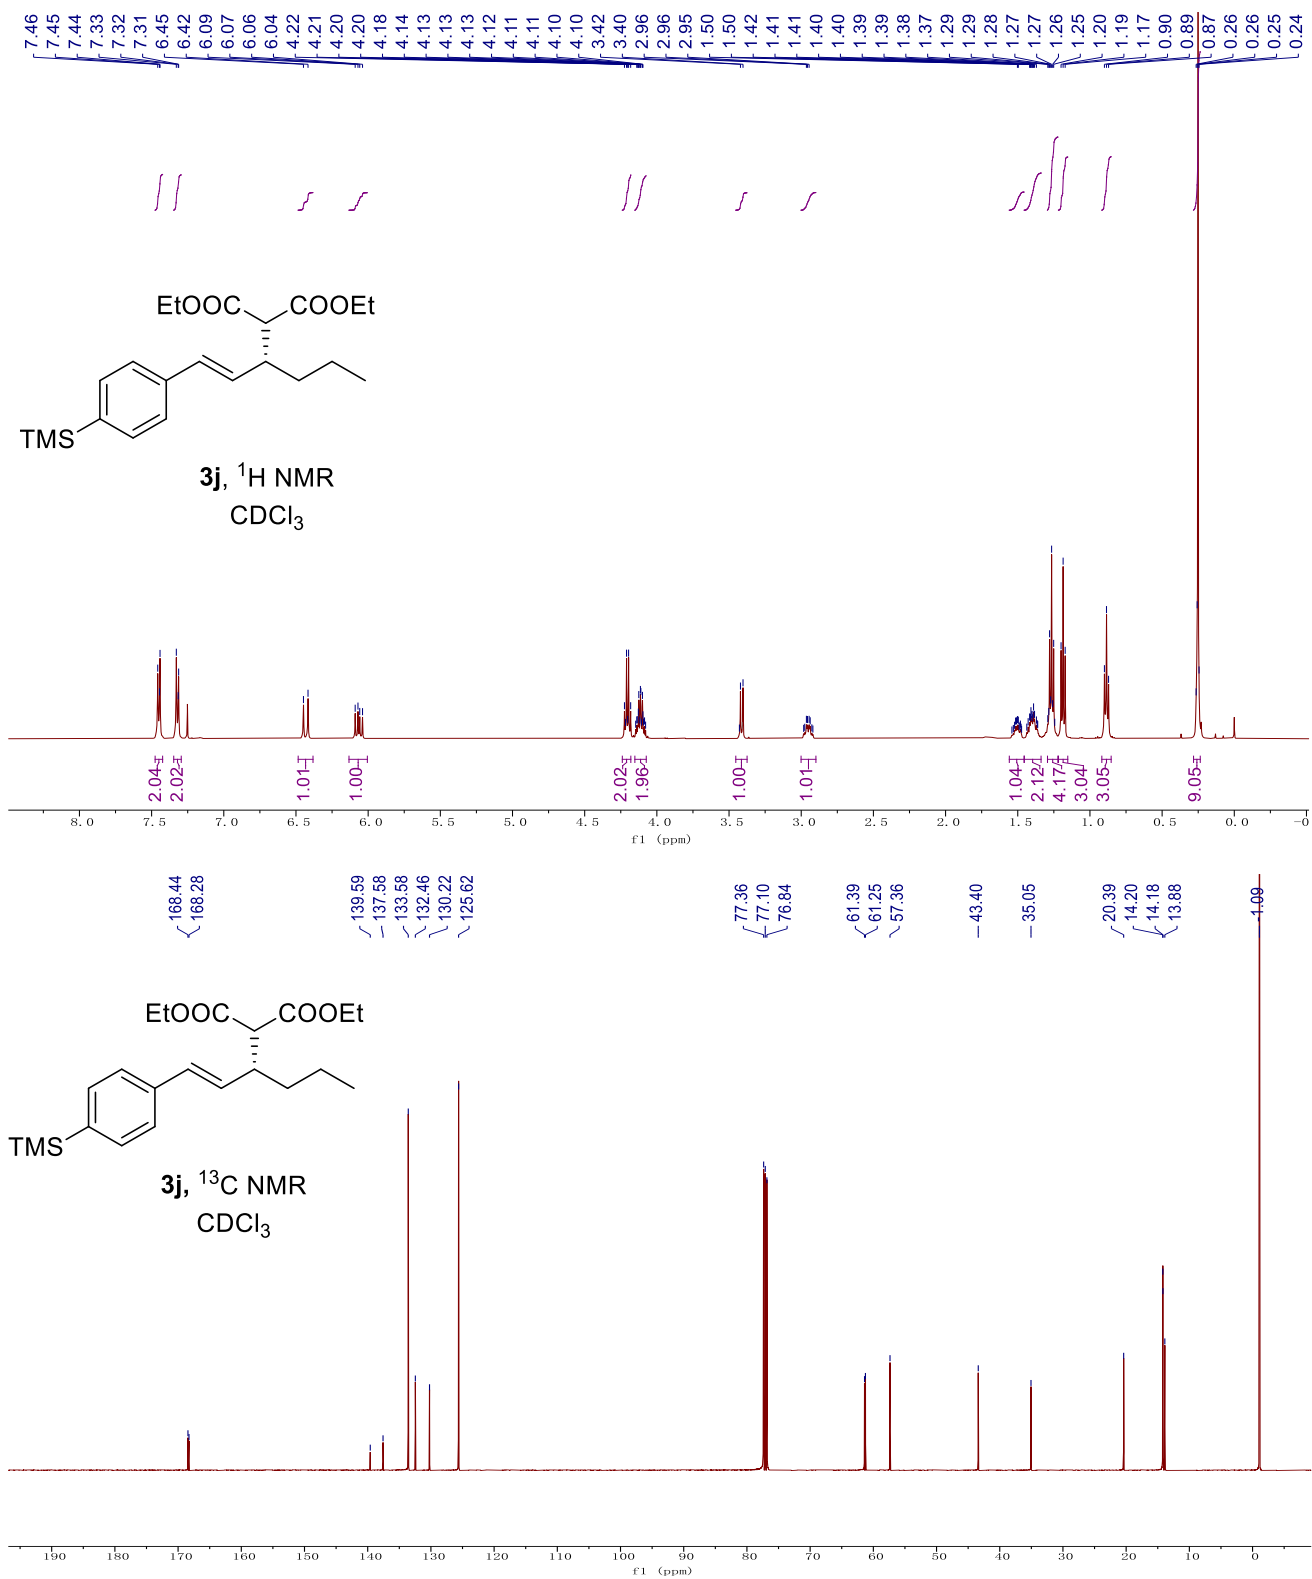

Supplementary Fig. 100.  $^1\text{H}$  NMR and  $^{13}\text{C}$  NMR spectra of compound **3j**.

7.32  
7.31  
7.30  
7.29  
7.28  
7.28  
6.99  
6.97  
6.95  
6.41  
6.38  
5.99  
5.97  
5.95  
5.94  
4.23  
4.21  
4.20  
4.18  
4.15  
4.14  
4.13  
4.12  
4.12  
4.11  
4.11  
4.10  
4.10  
4.09  
3.42  
3.40  
2.96  
2.96  
2.95  
2.94  
2.93  
2.92  
1.52  
1.52  
1.51  
1.50  
1.50  
1.48  
1.44  
1.43  
1.42  
1.41  
1.39  
1.38  
1.30  
1.29  
1.29  
1.28  
1.26  
1.25  
1.20  
1.20  
1.19  
1.17  
1.16  
0.91  
0.90  
0.88

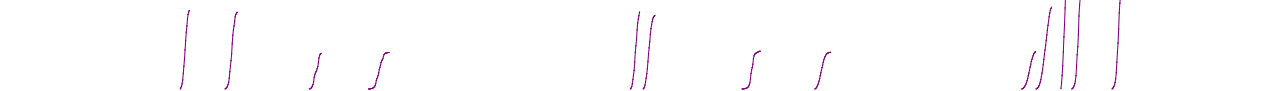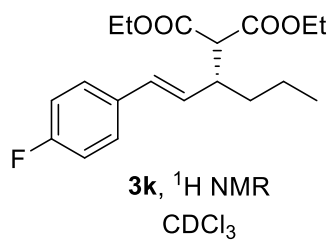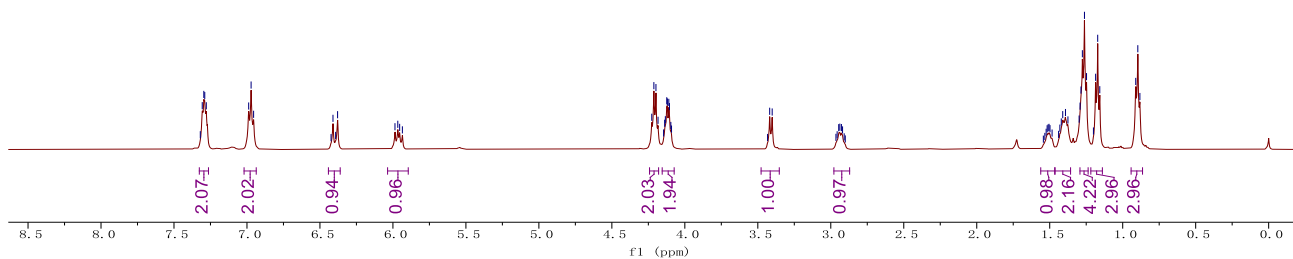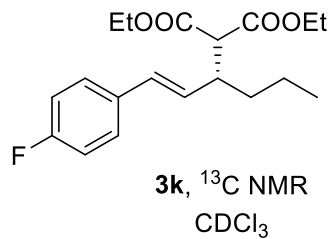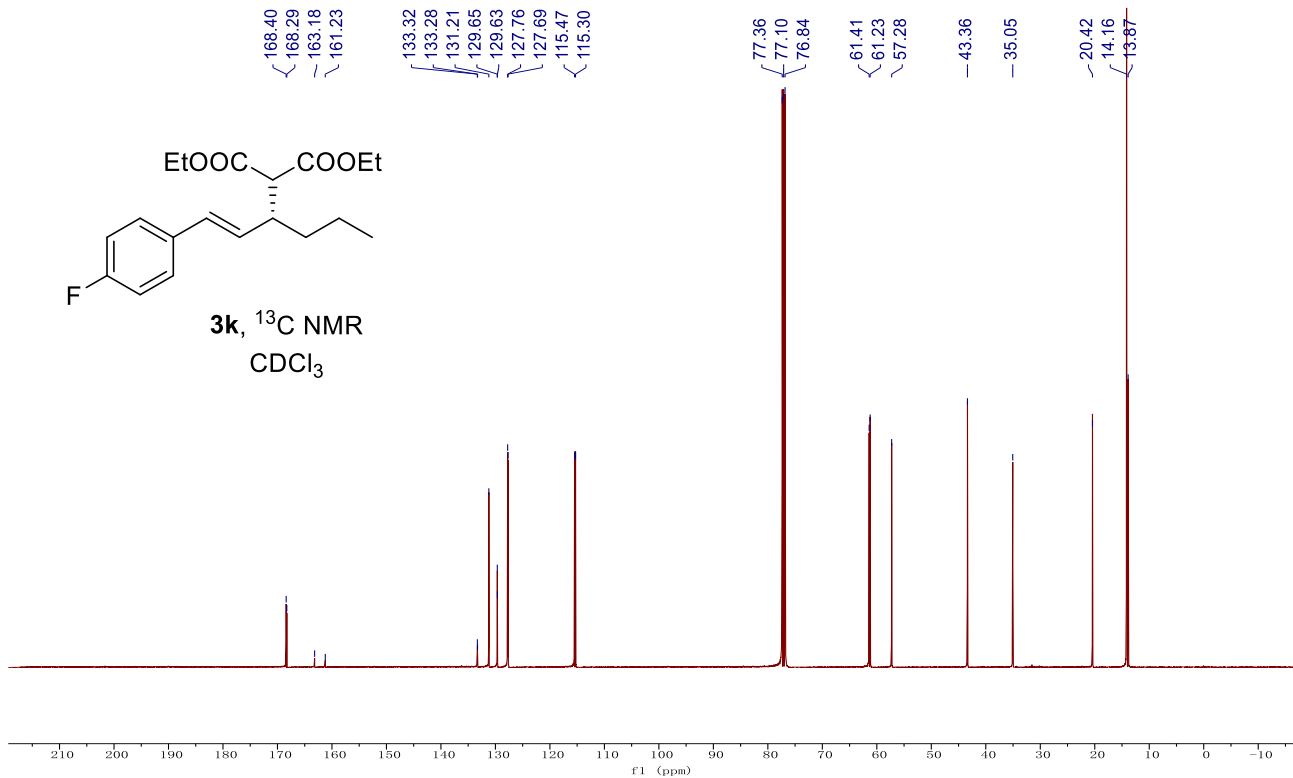

-115.03

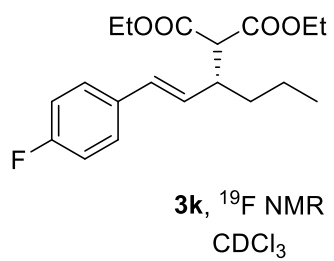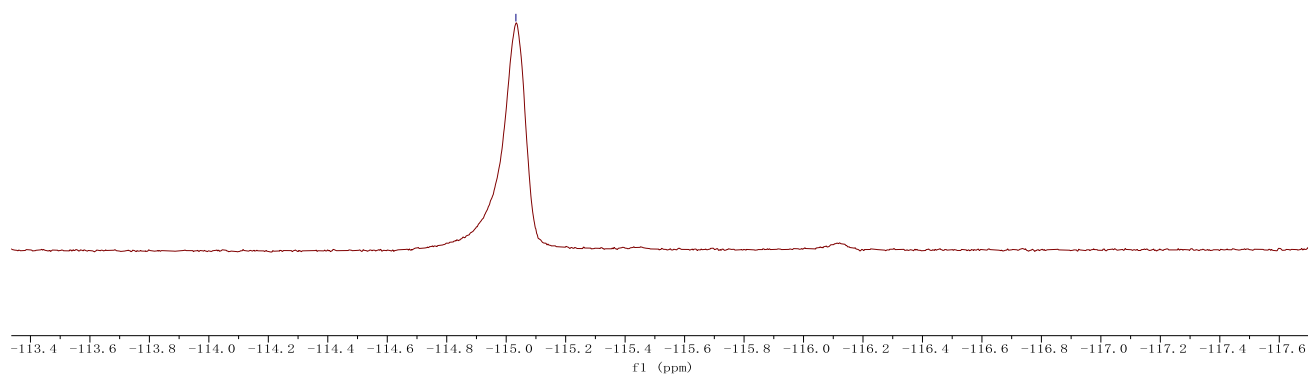

**Supplementary Fig. 101.**  $^1\text{H}$  NMR  $^{13}\text{C}$  NMR and  $^{19}\text{F}$  NMR spectra of compound **3k**.

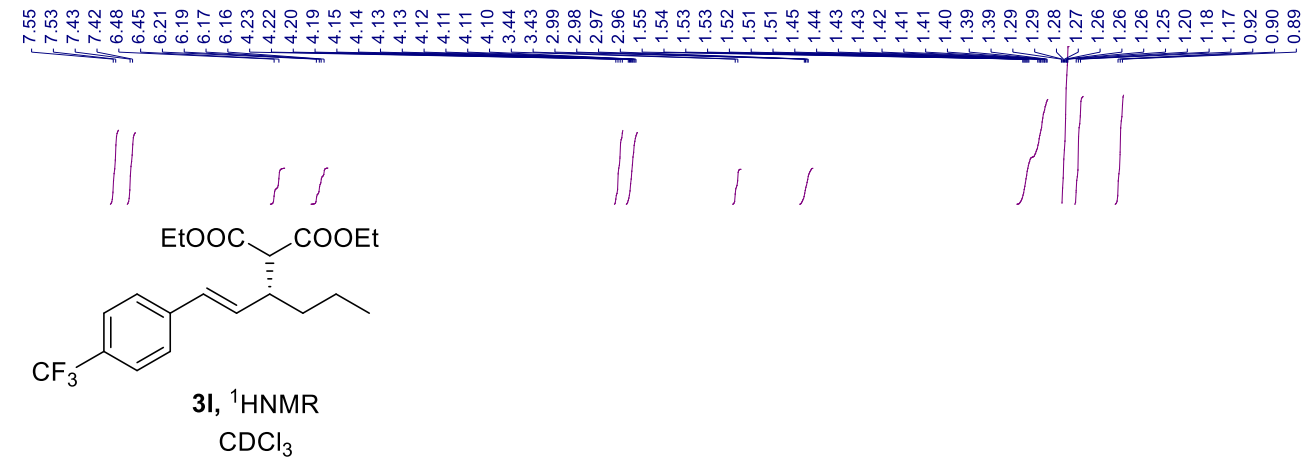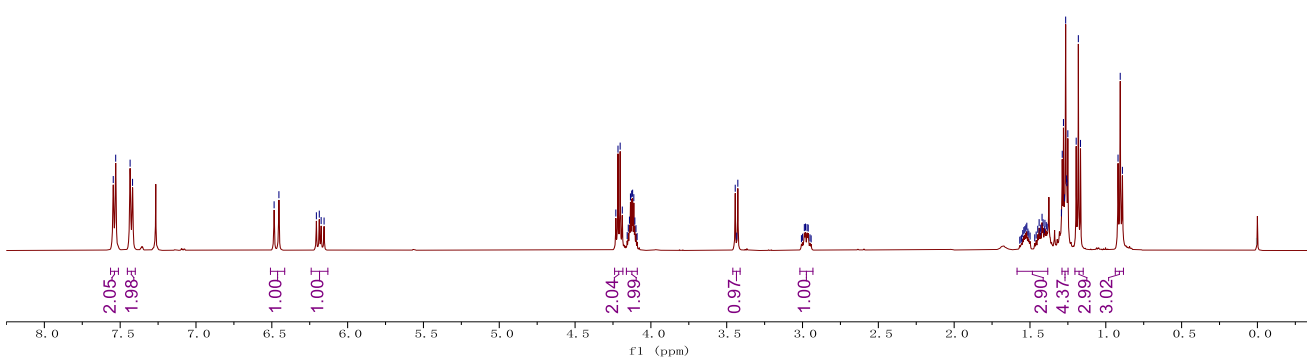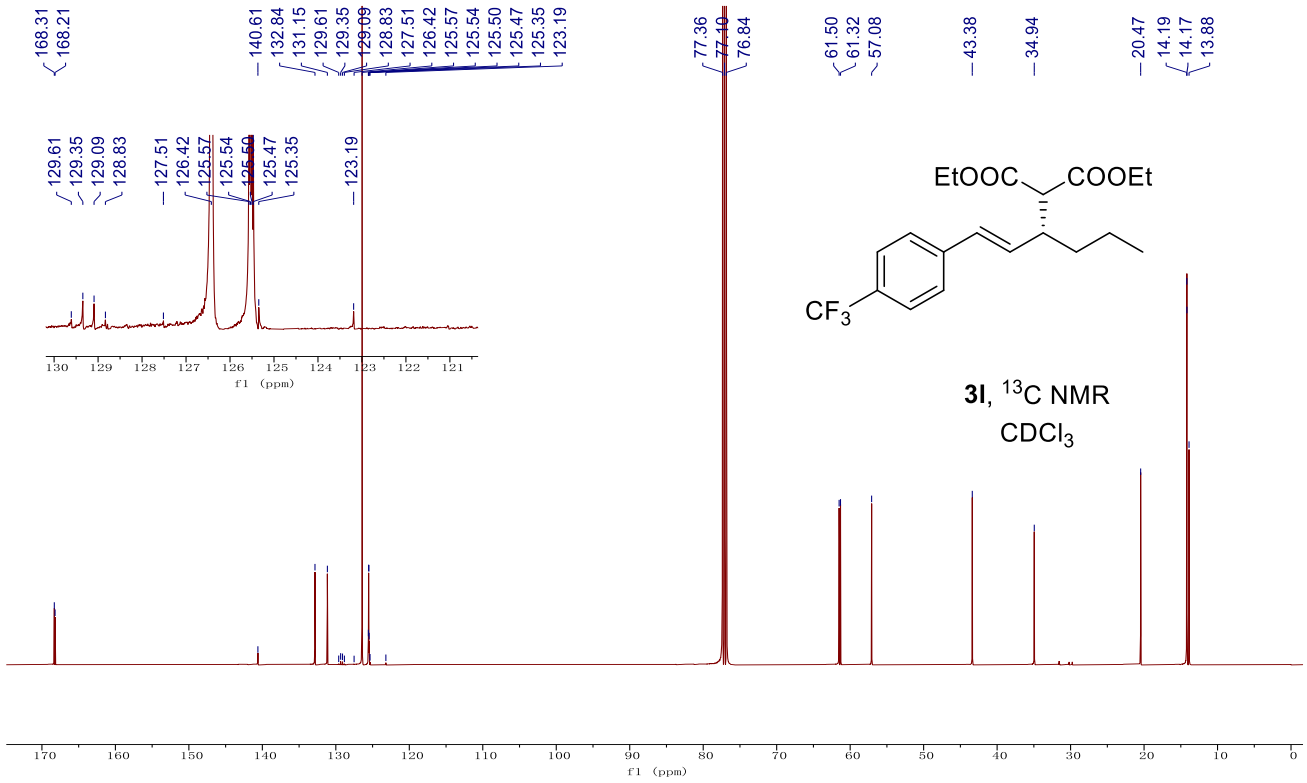

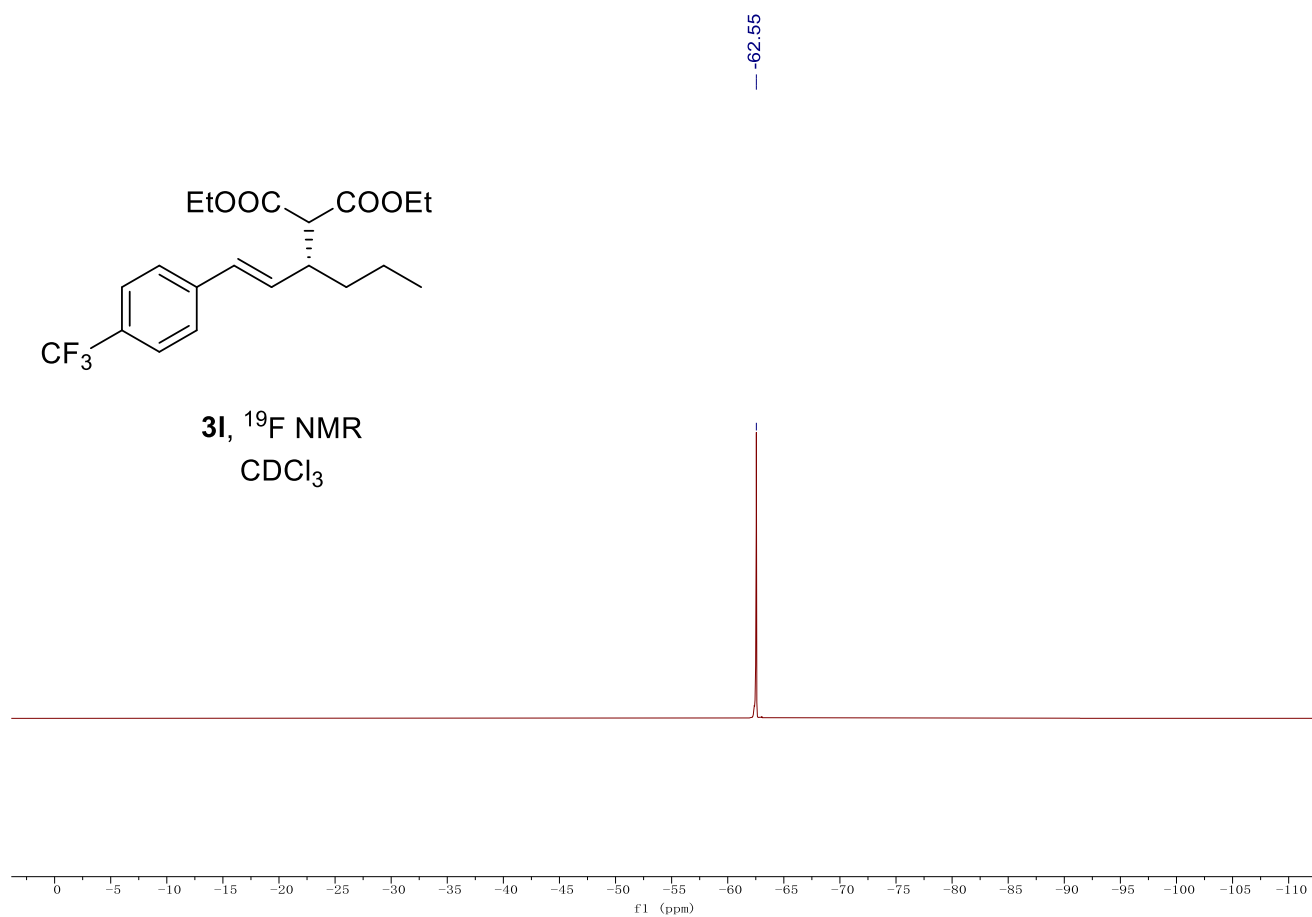

**Supplementary Fig. 102.**  $^1\text{H}$  NMR,  $^{13}\text{C}$  NMR and  $^{19}\text{F}$  NMR spectra of compound **31**.

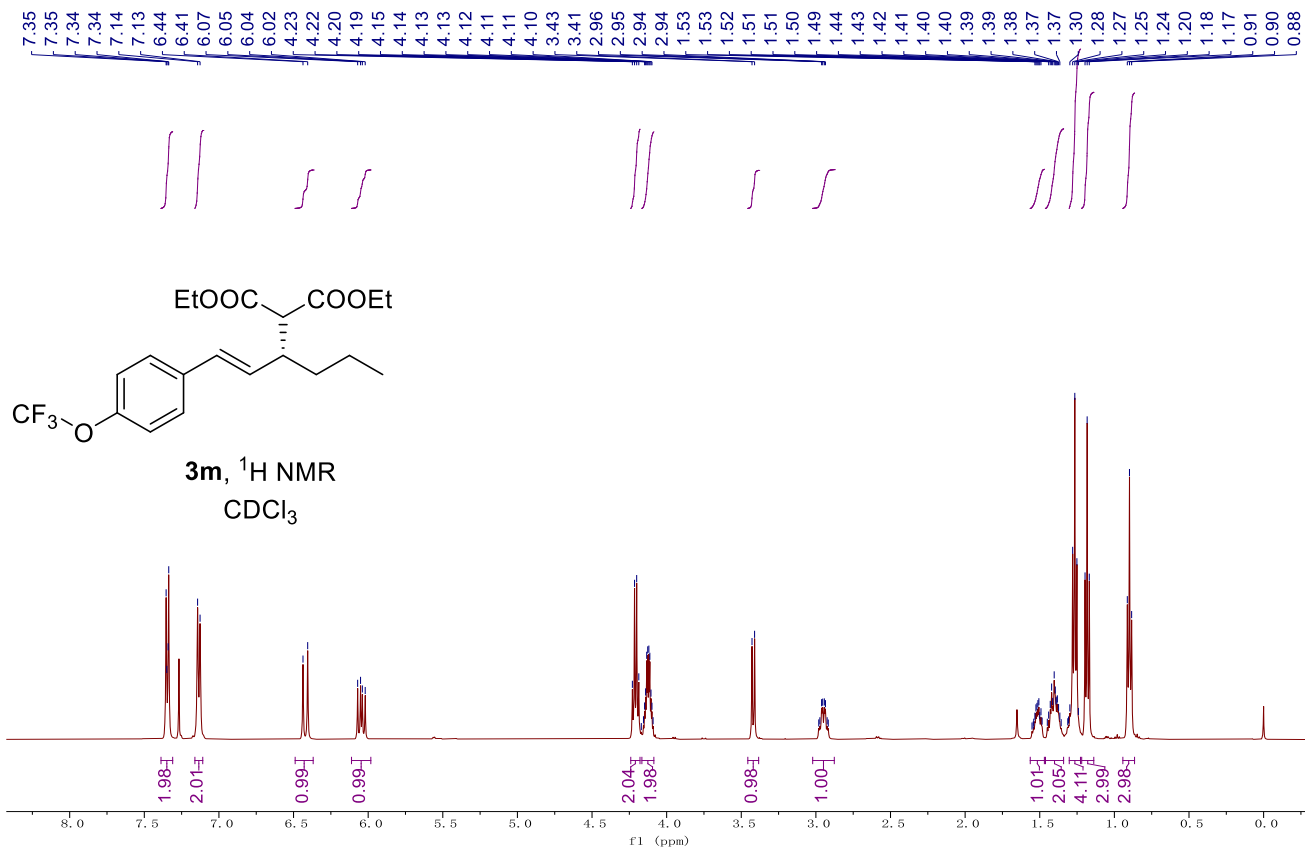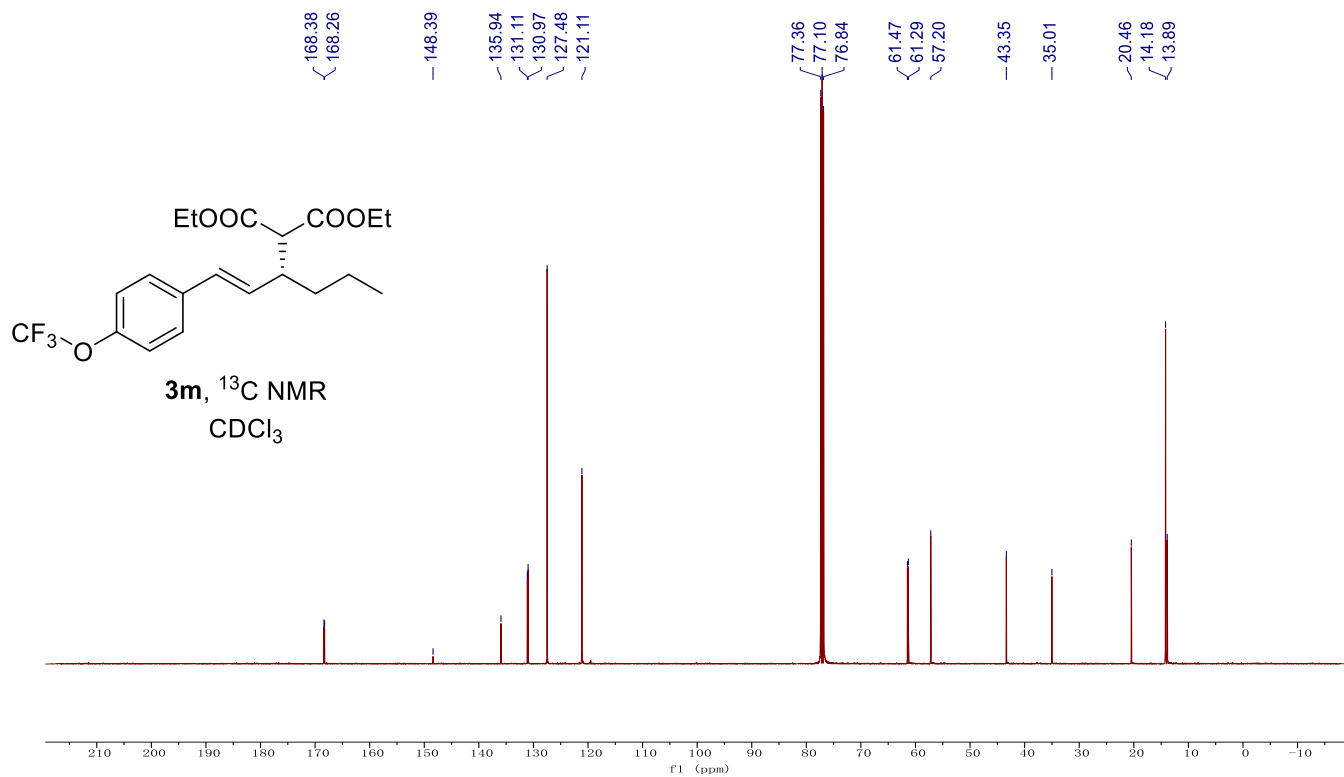

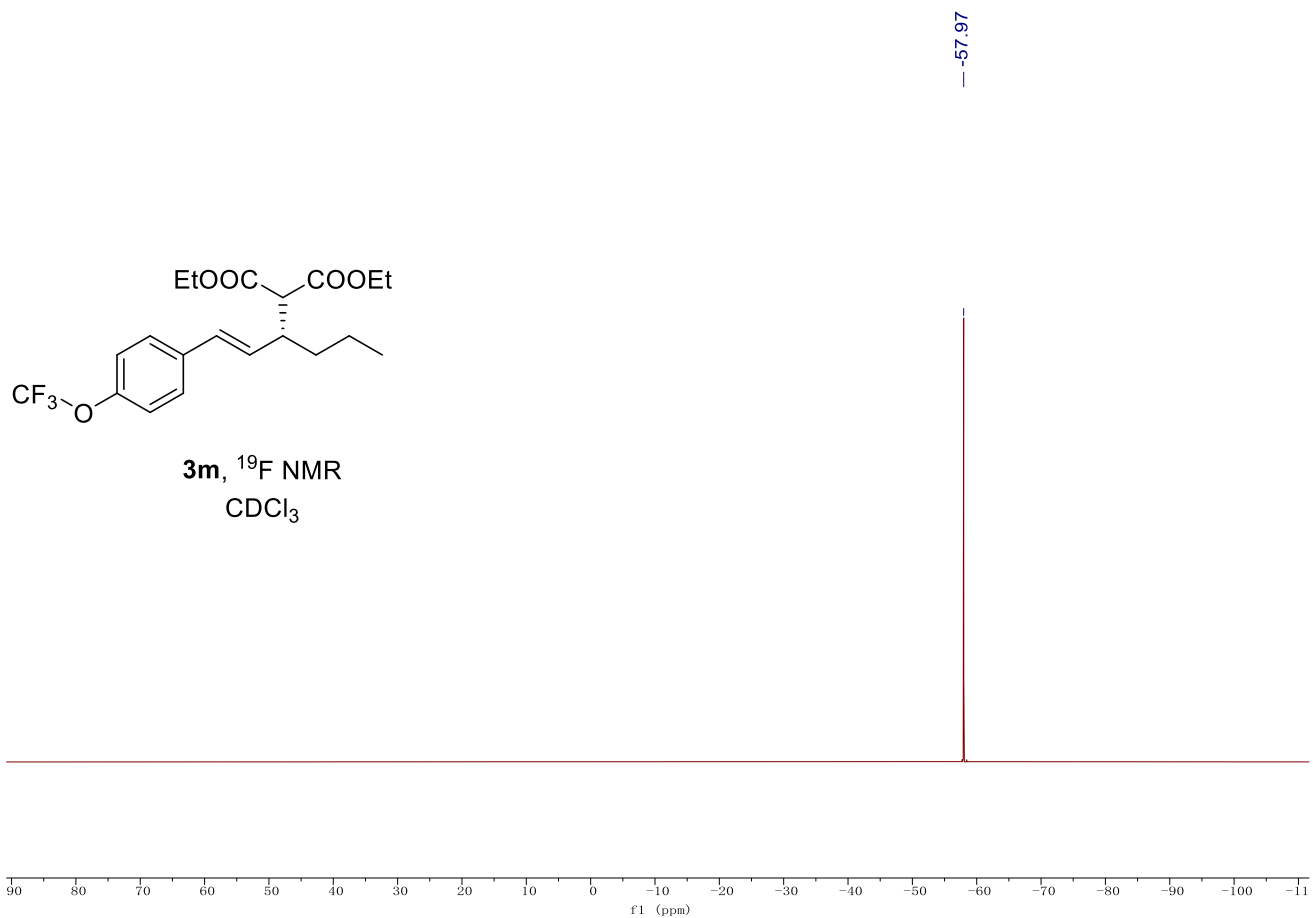

**Supplementary Fig. 103.**  $^1\text{H}$  NMR,  $^{13}\text{C}$  NMR and  $^{19}\text{F}$  NMR spectra of compound **3m**.



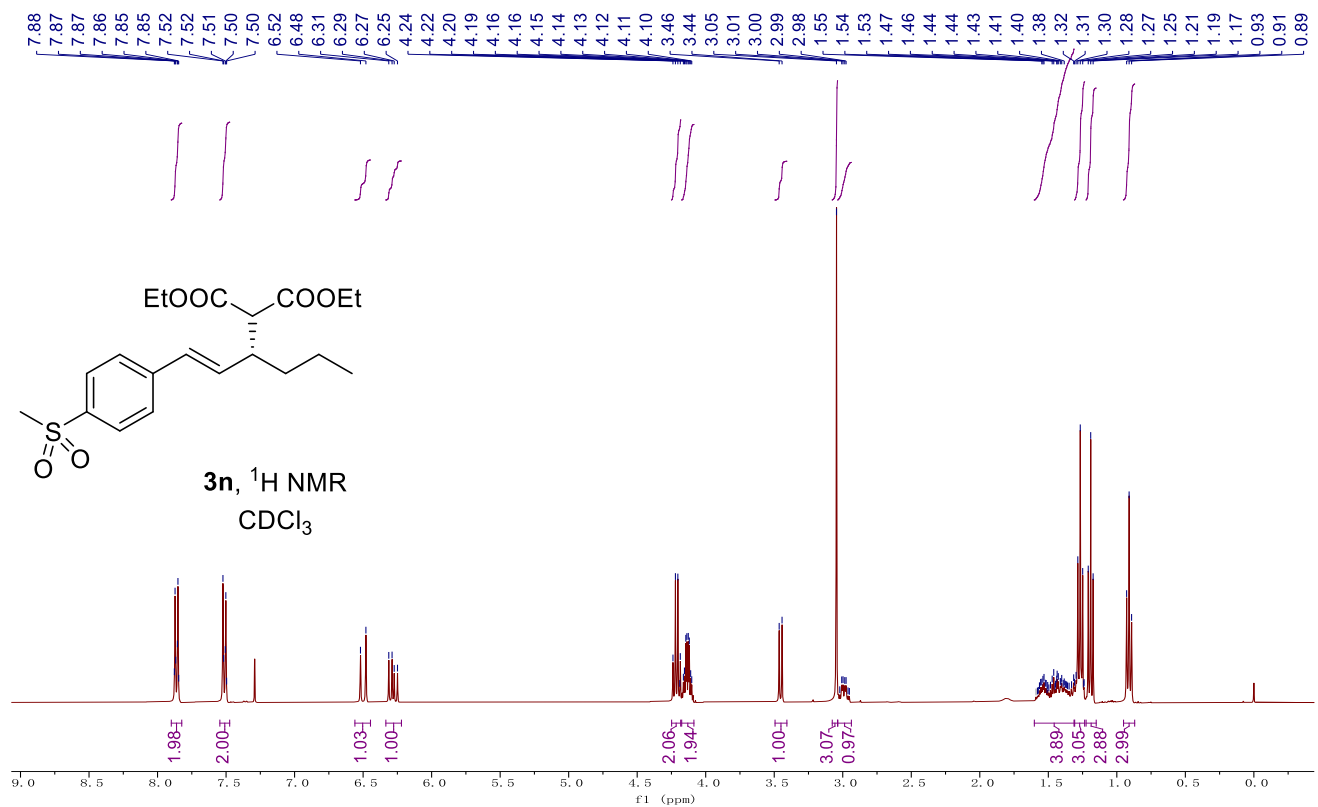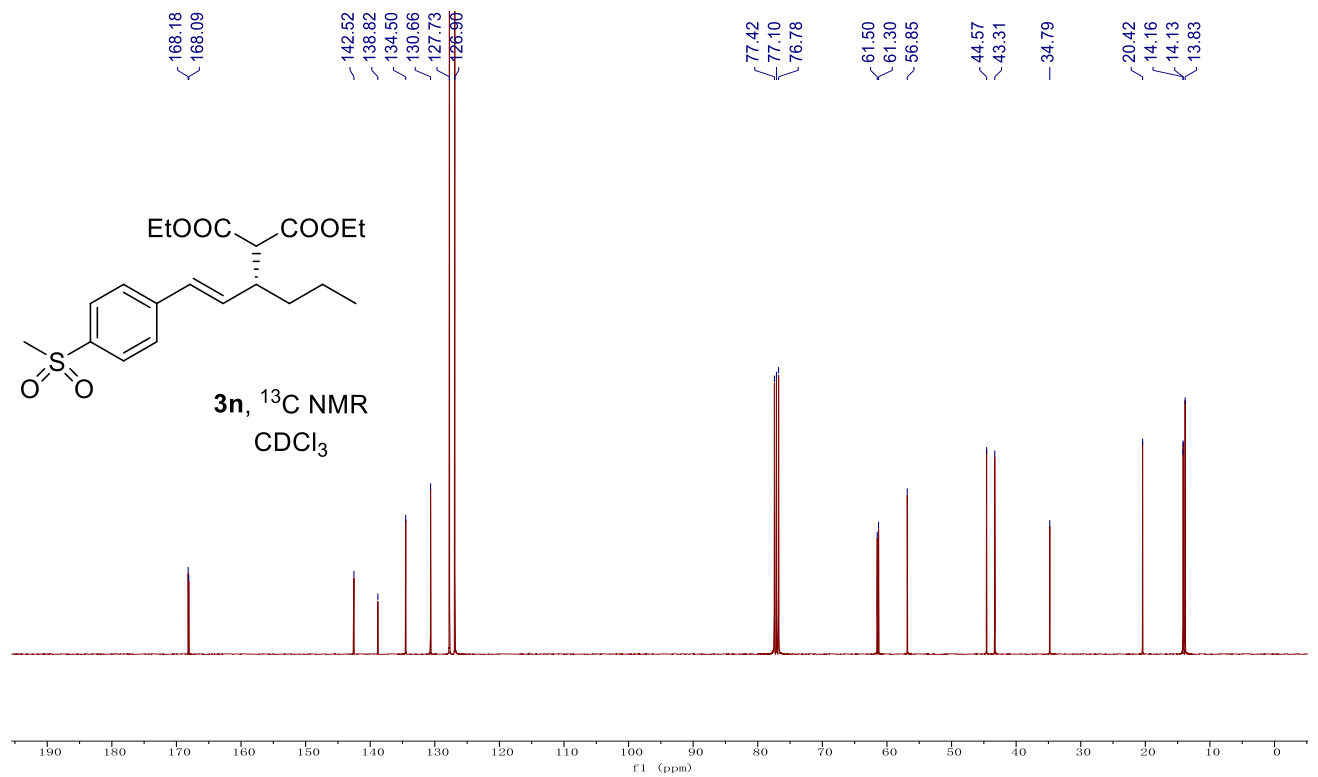

**Supplementary Fig. 104.**  $^1\text{H}$  NMR and  $^{13}\text{C}$  NMR spectra of compound **3n**.

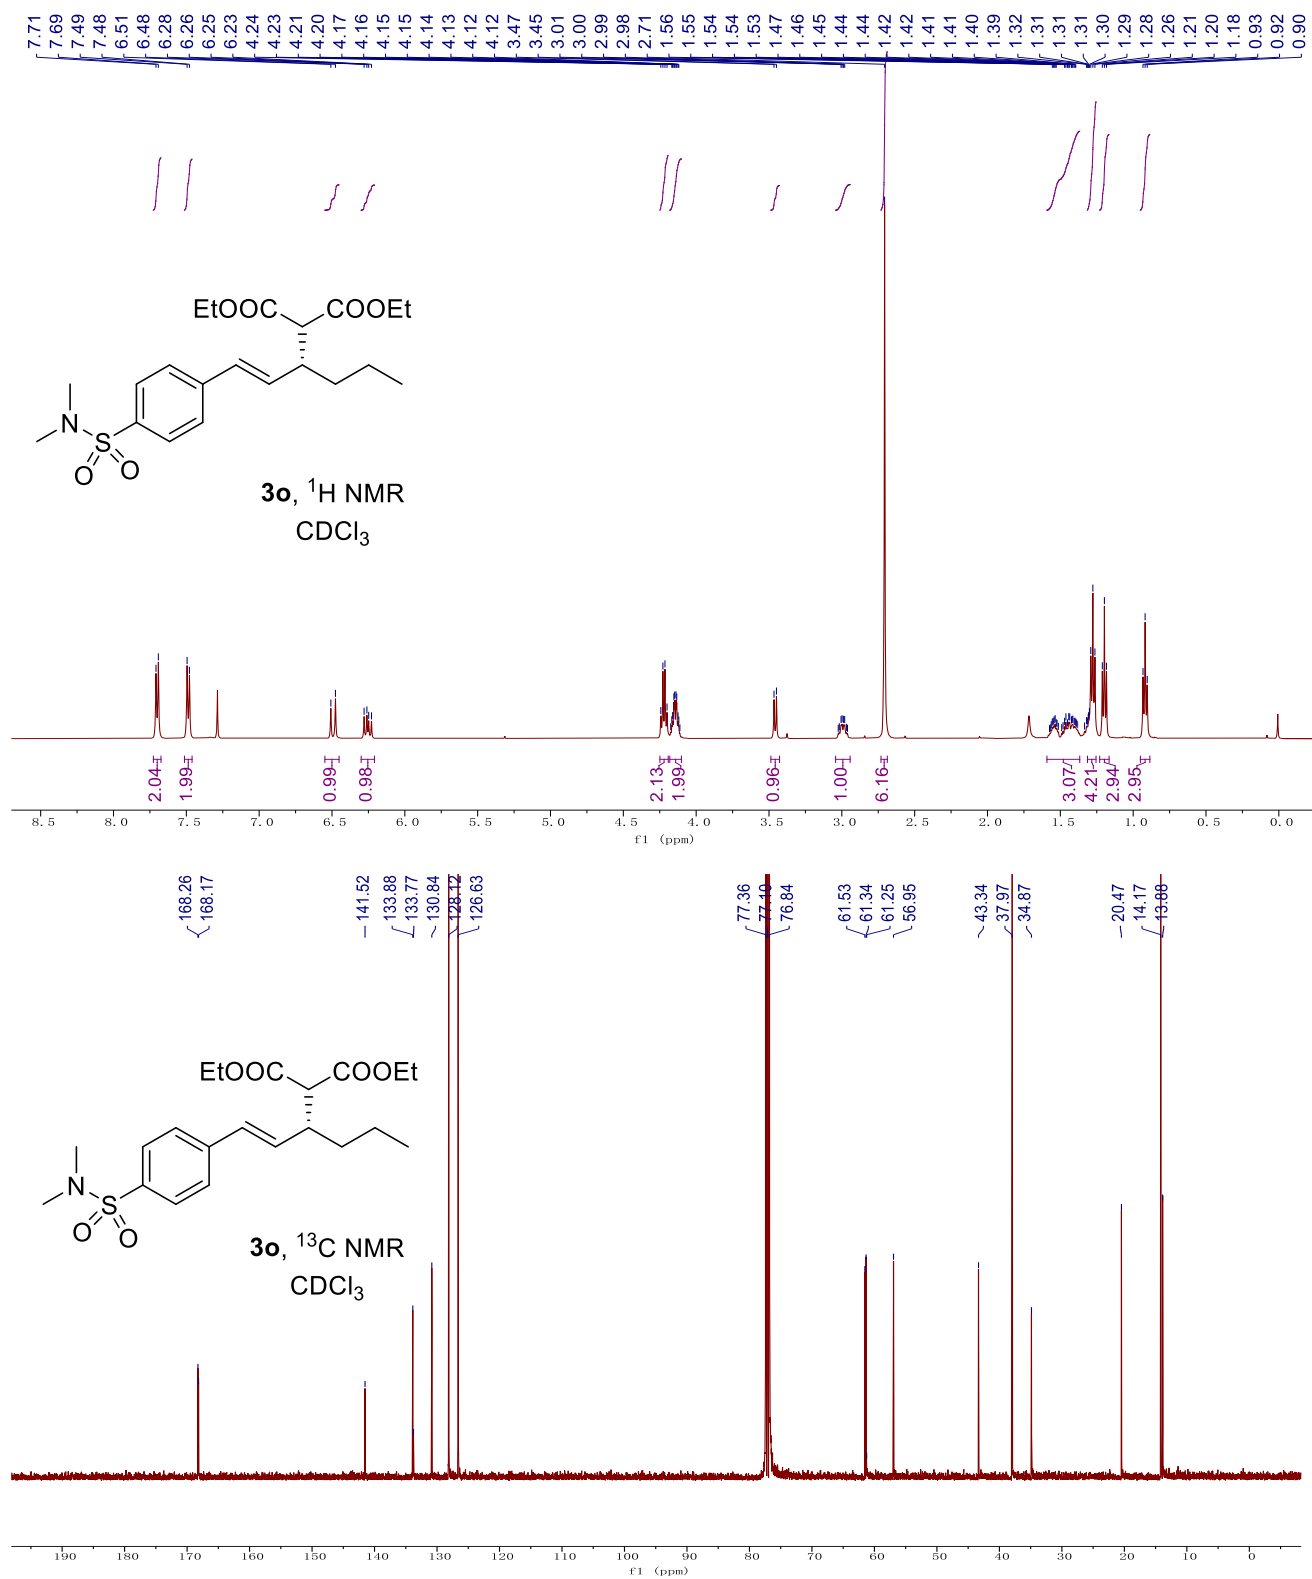

**Supplementary Fig. 105.** <sup>1</sup>H NMR and <sup>13</sup>C NMR spectra of compound **3o**.

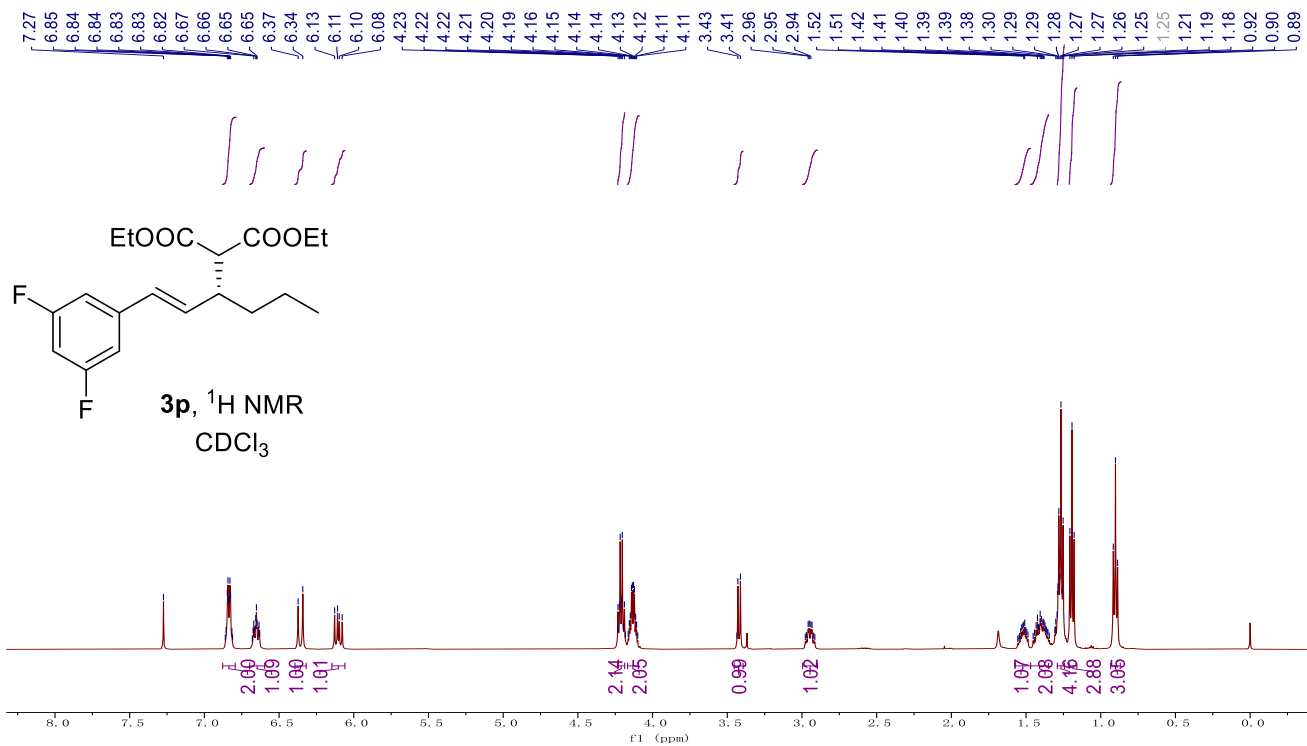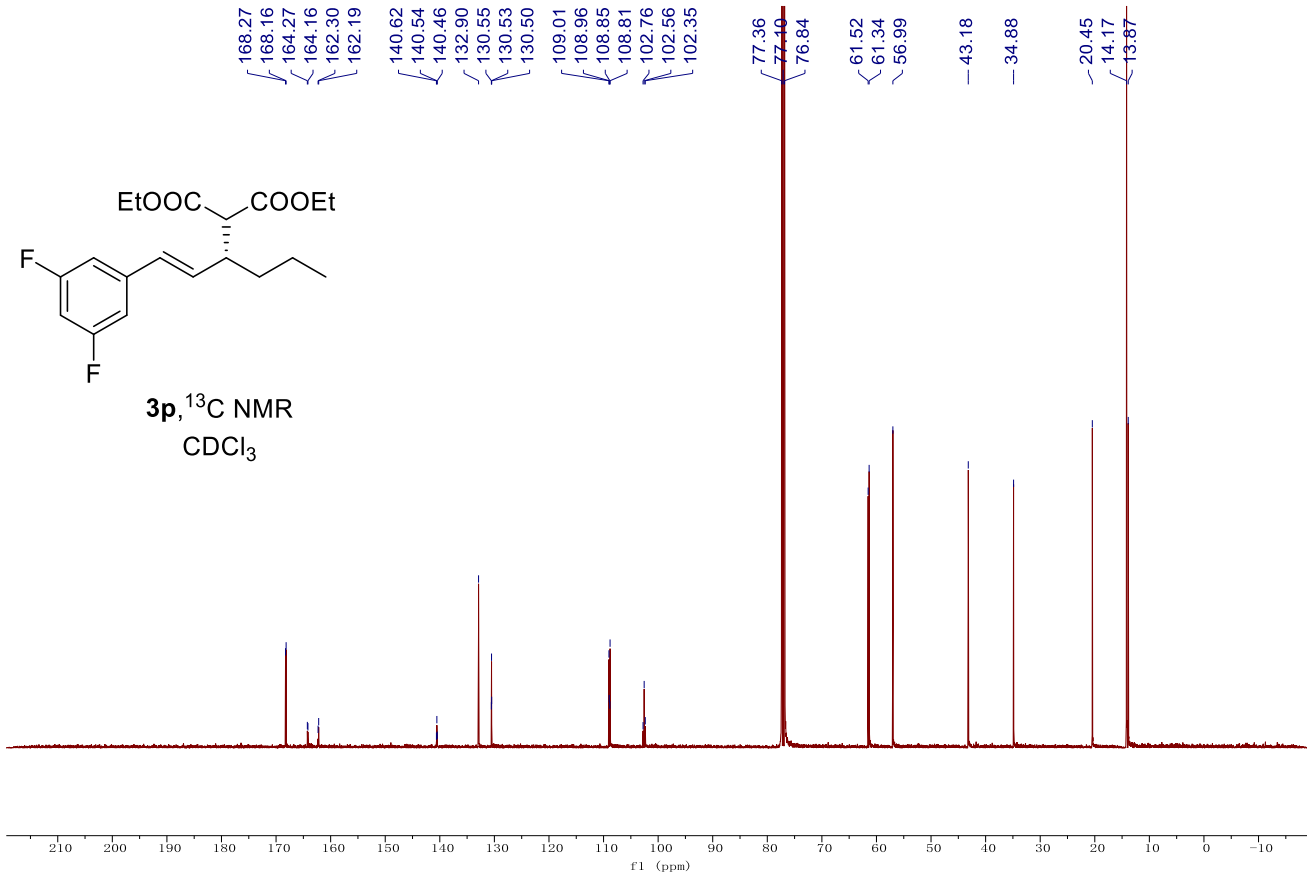

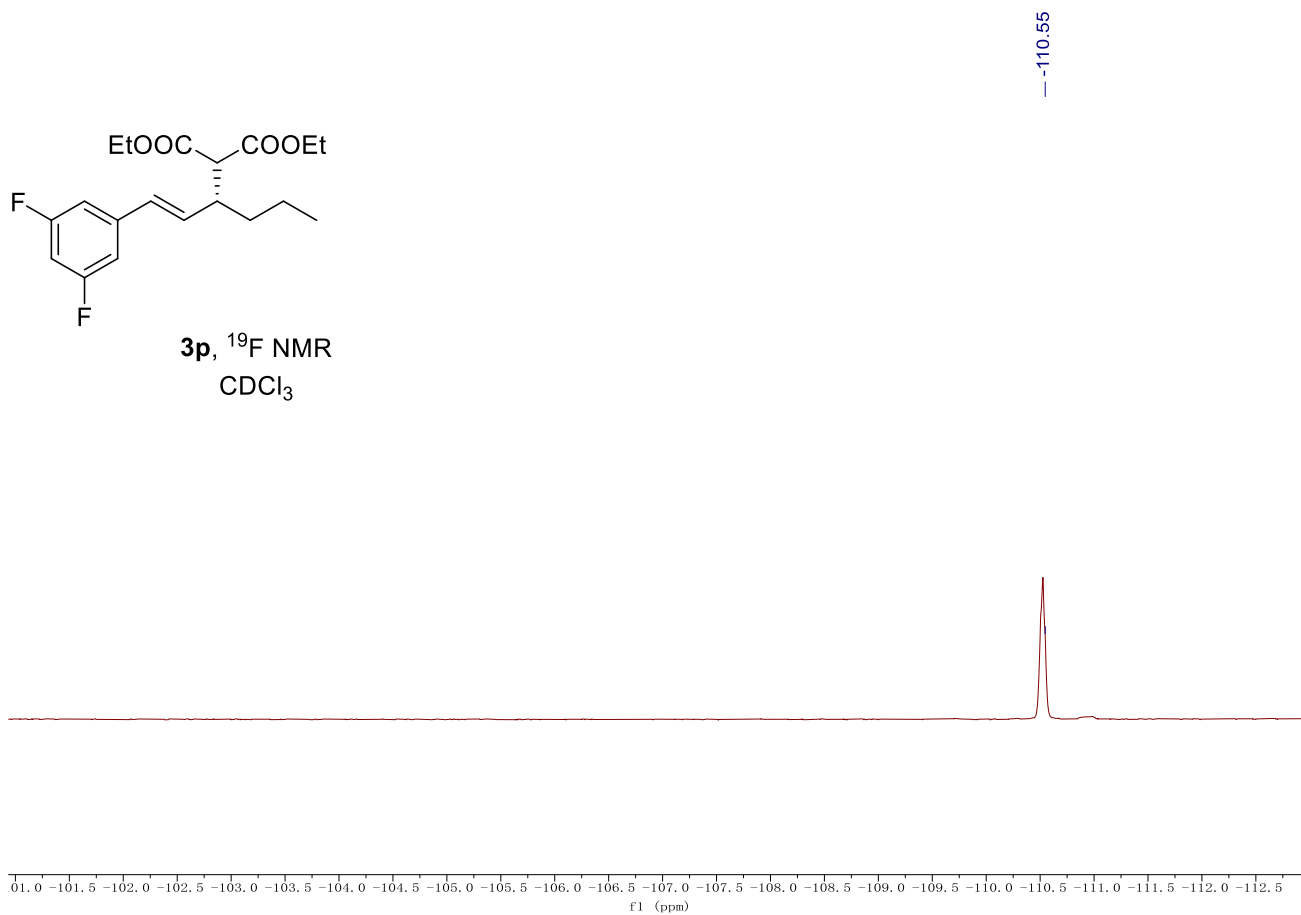

**Supplementary Fig. 106.**  $^1\text{H}$  NMR,  $^{13}\text{C}$  NMR and  $^{19}\text{F}$  NMR spectra of compound **3p**.

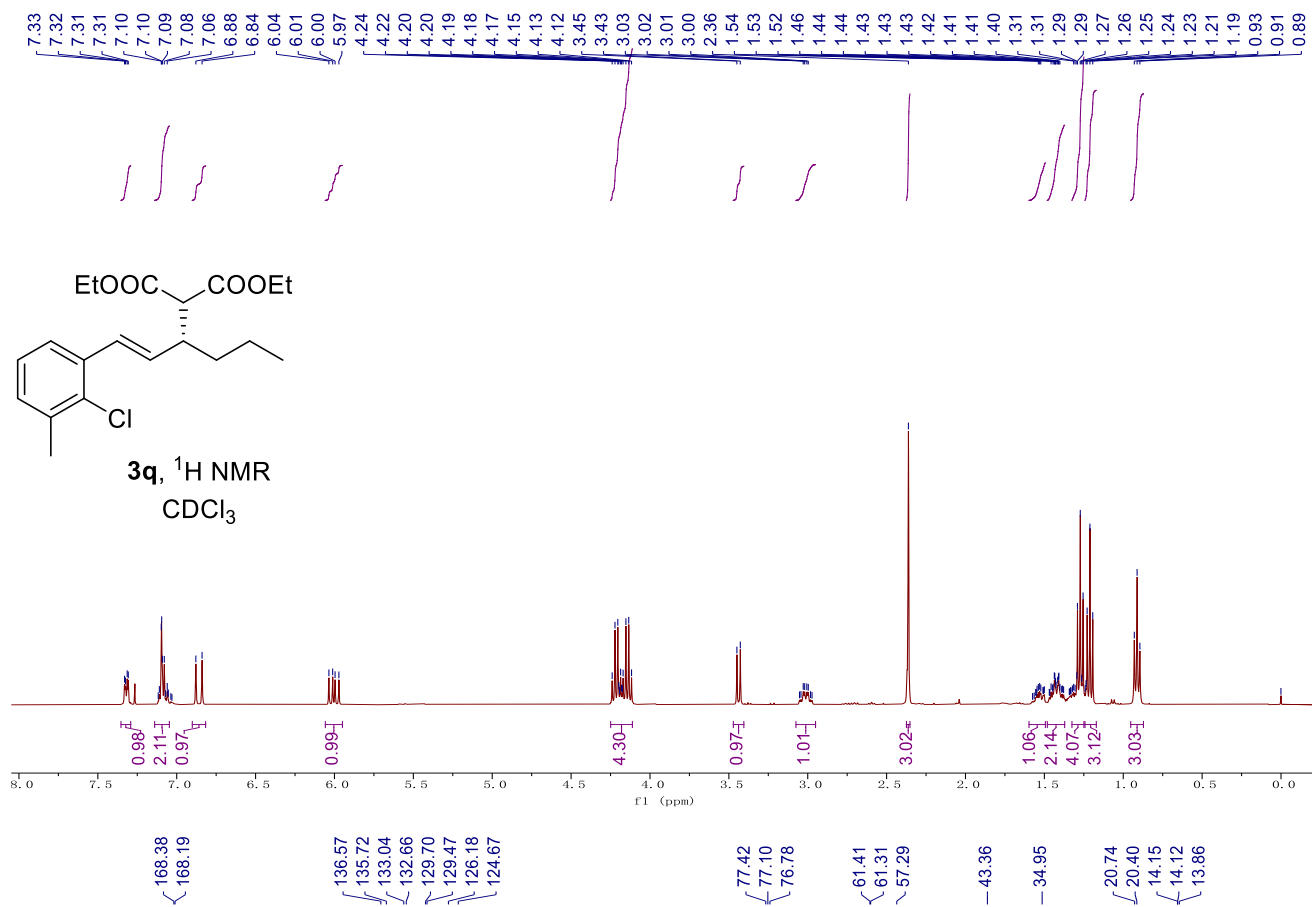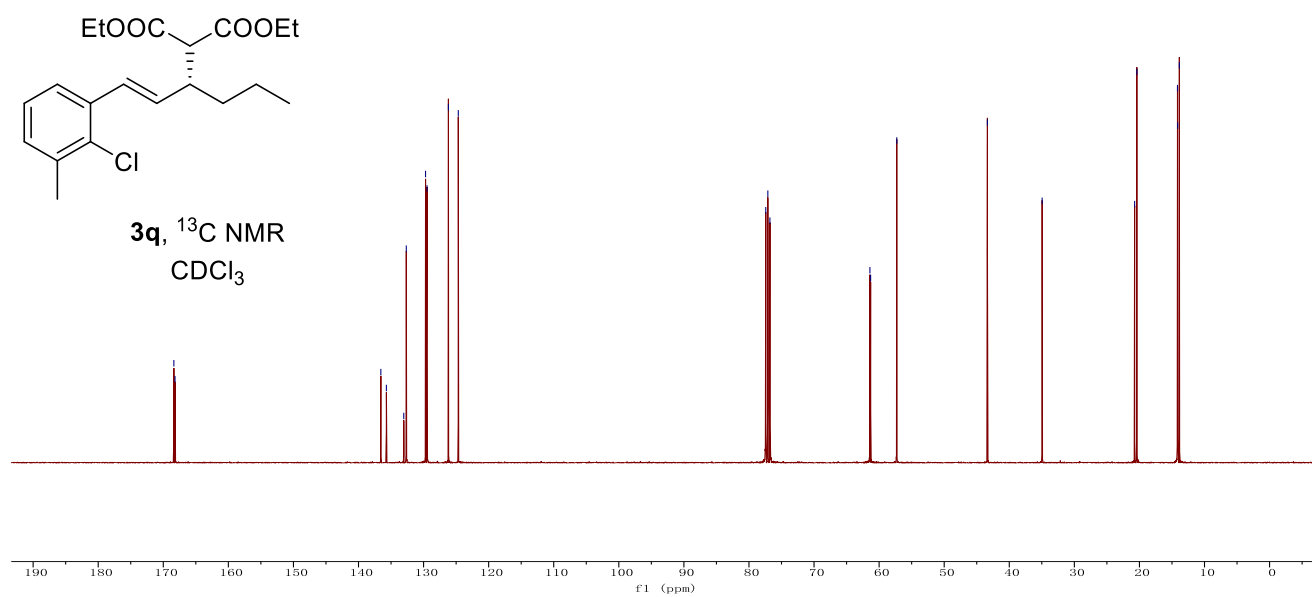

Supplementary Fig. 107.  $^1\text{H}$  NMR and  $^{13}\text{C}$  NMR spectra of compound **3q**.

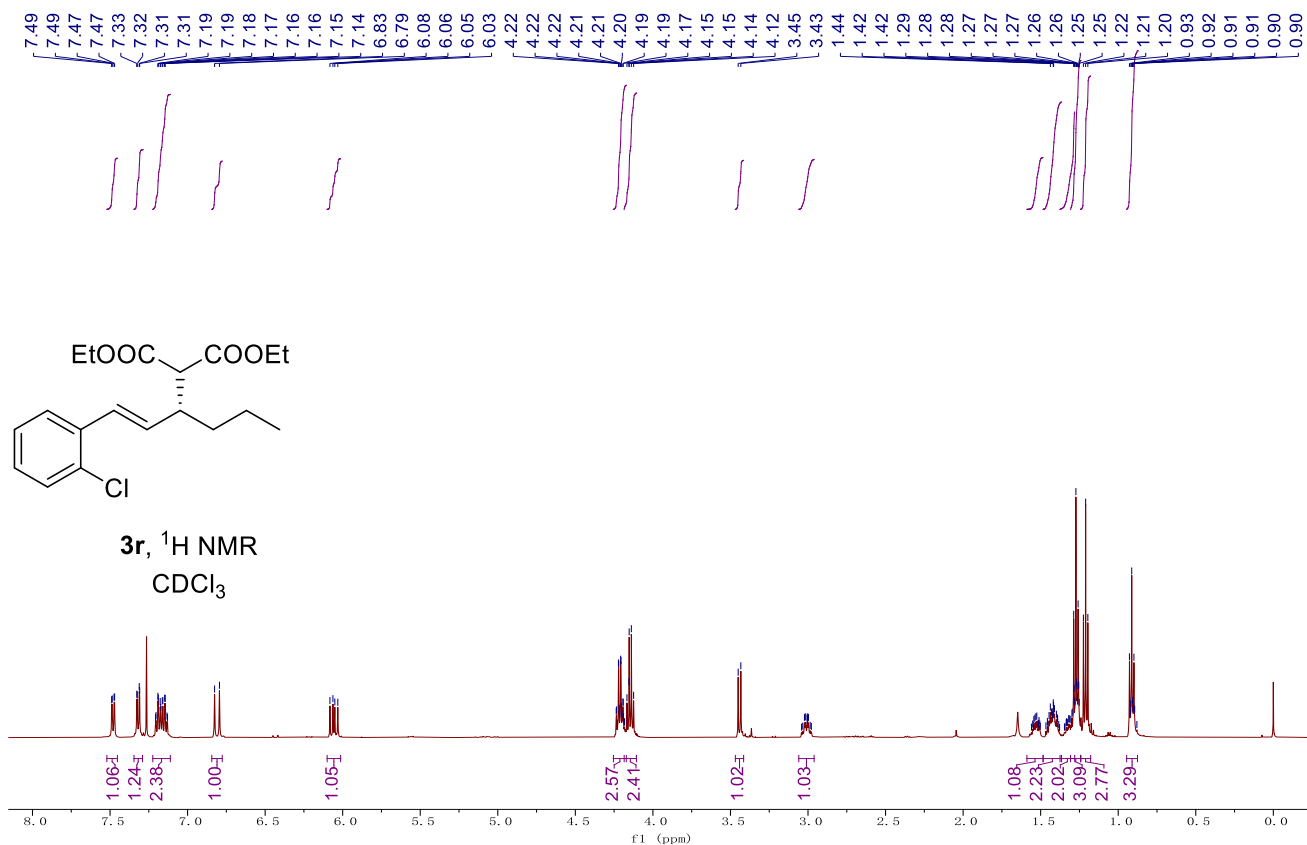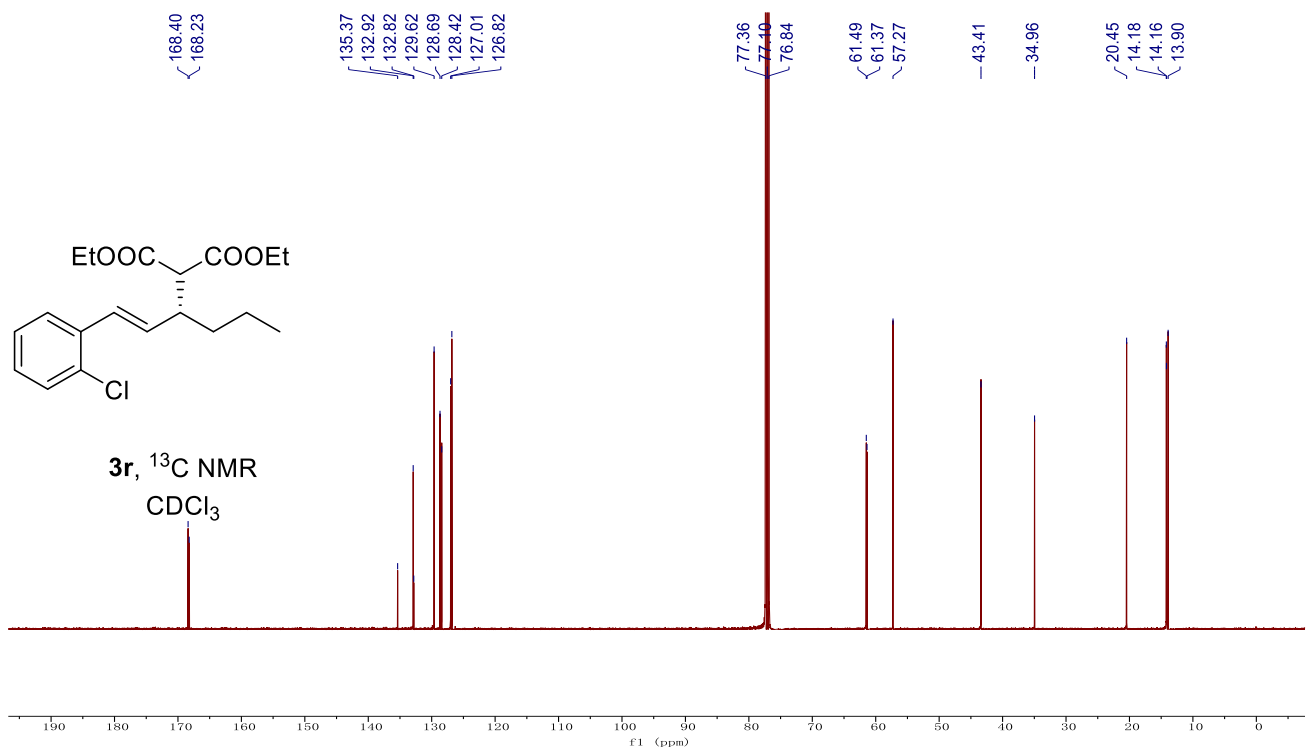

**Supplementary Fig. 108.**  $^1\text{H}$  NMR and  $^{13}\text{C}$  NMR spectra of compound **3r**.

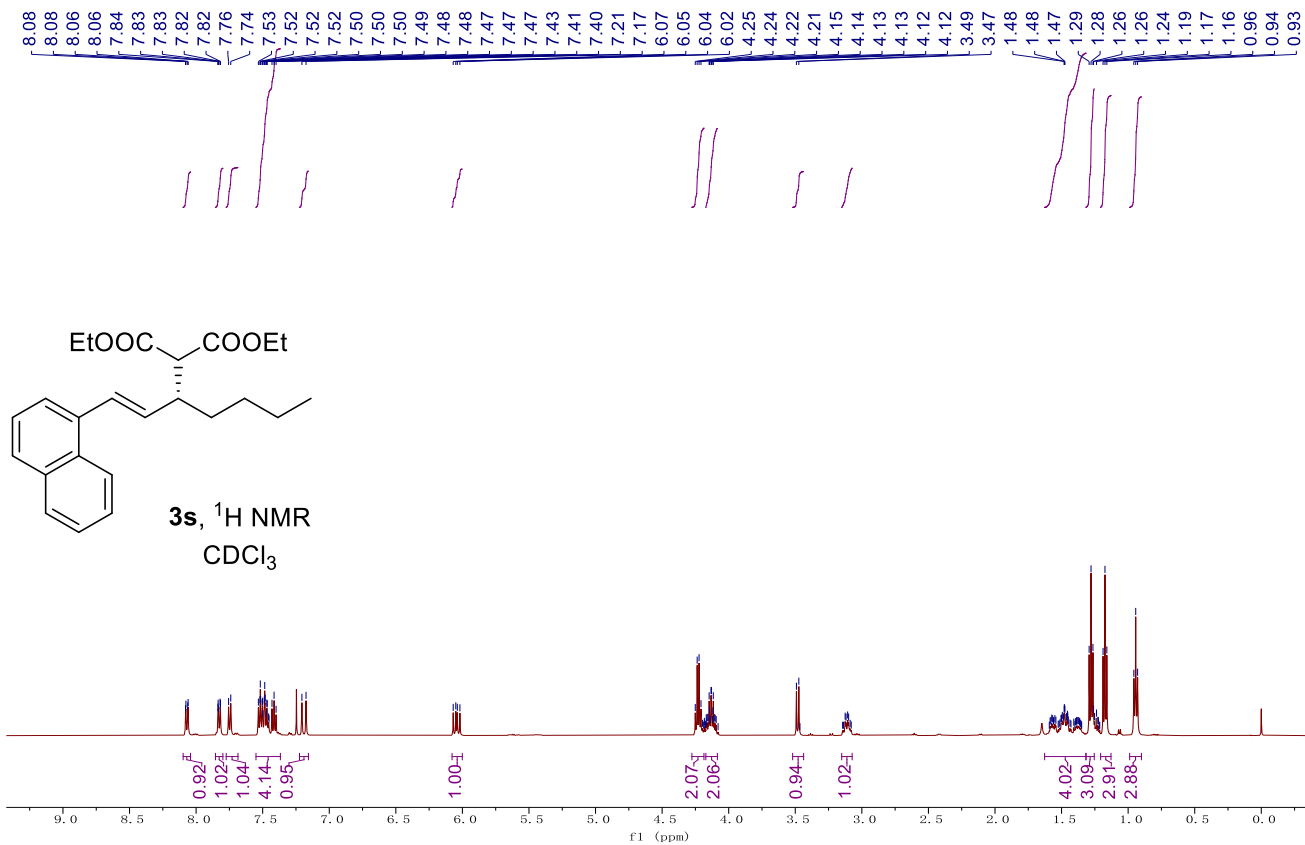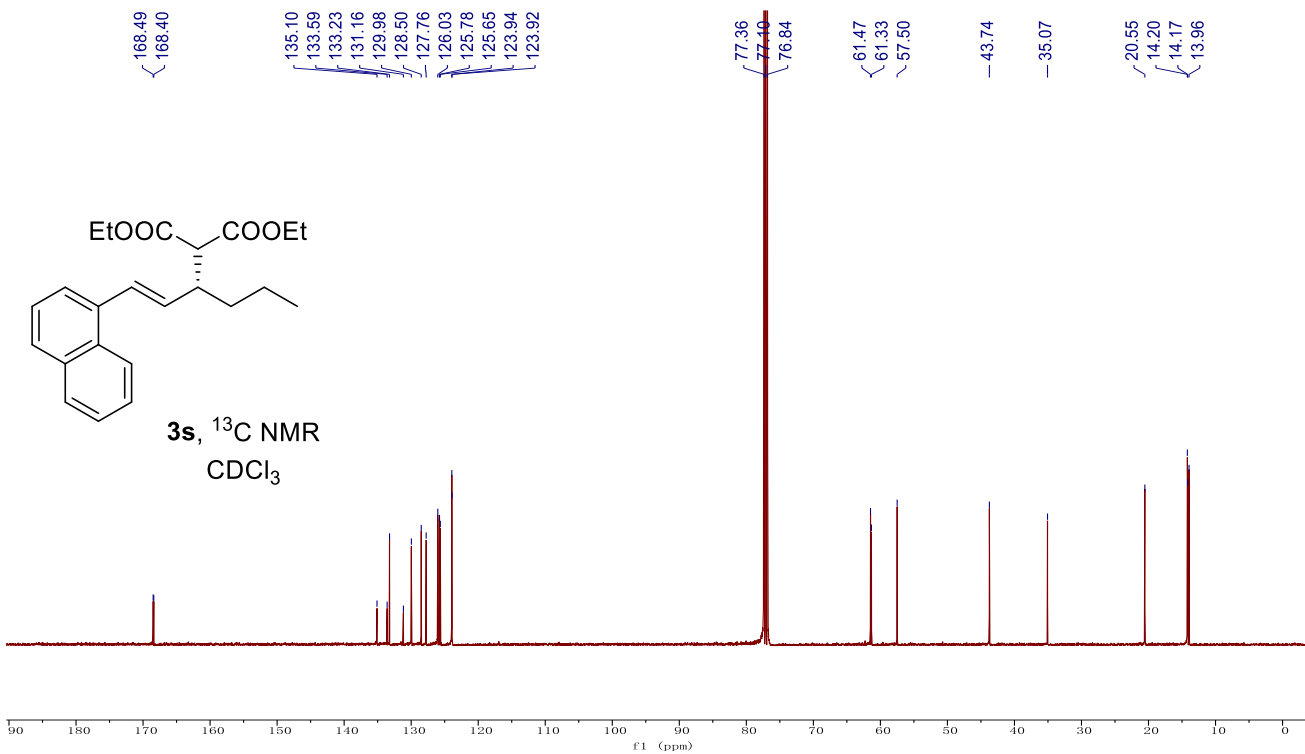

Supplementary Fig. 109. <sup>1</sup>H NMR and <sup>13</sup>C NMR spectra of compound **3s**.

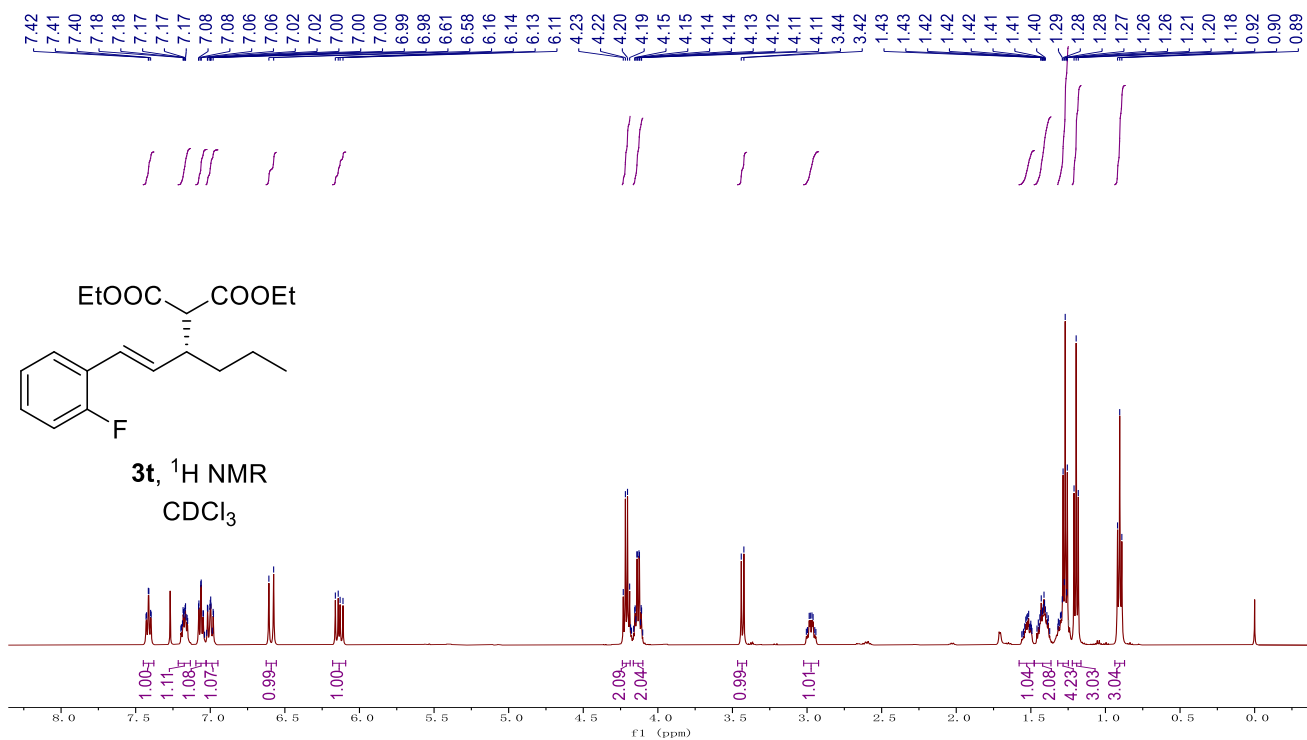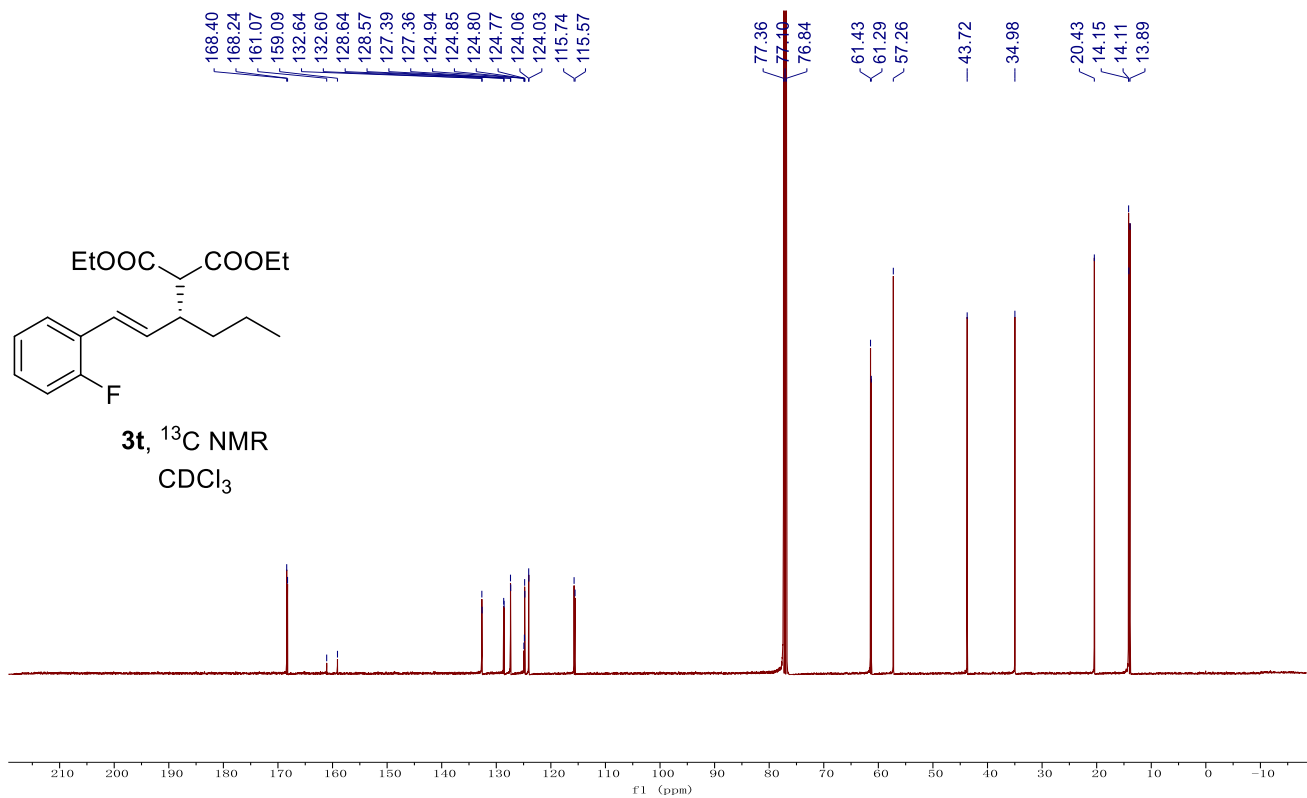



-118.52

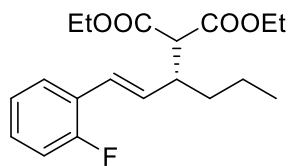

**3t**,  $^{19}\text{F}$  NMR  
 $\text{CDCl}_3$

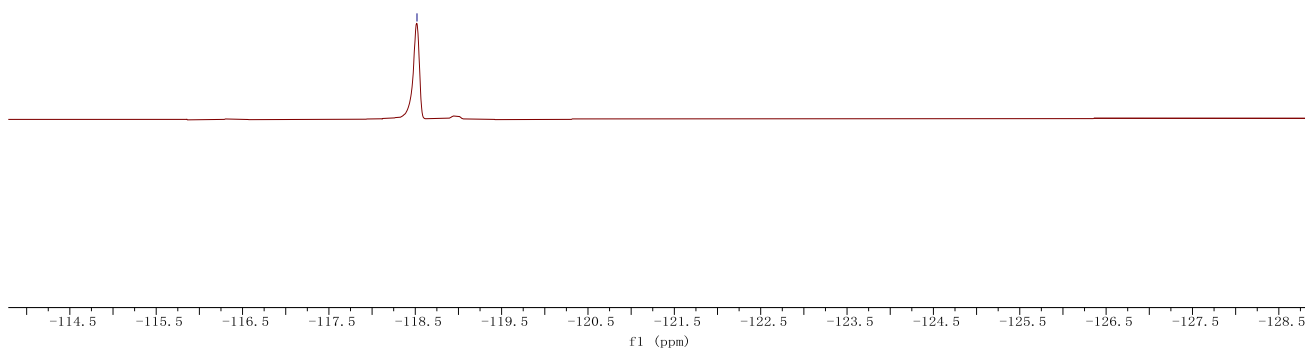

**Supplementary Fig. 110.**  $^1\text{H}$  NMR,  $^{13}\text{C}$  NMR and  $^{19}\text{F}$  NMR spectra of compound **3t**.

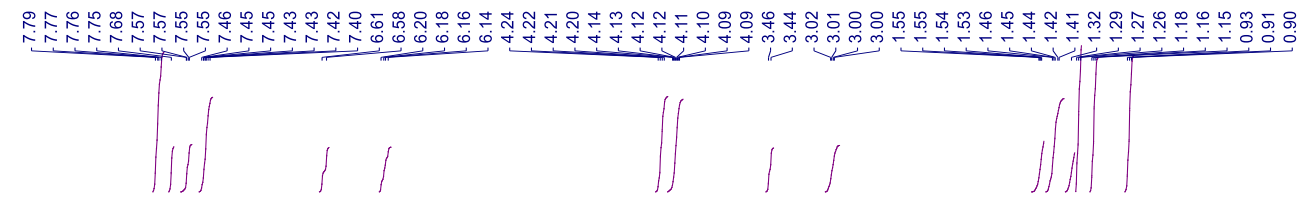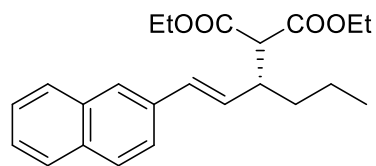

**3u**, <sup>1</sup>H NMR  
CDCl<sub>3</sub>

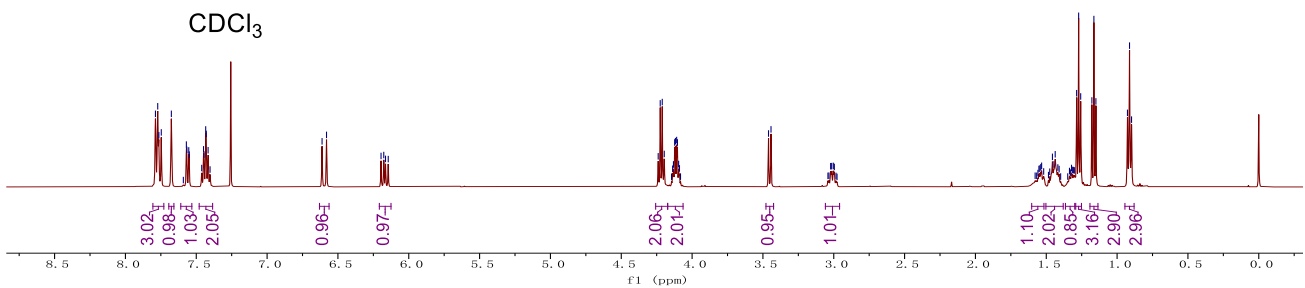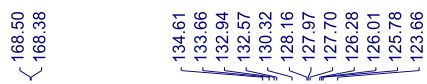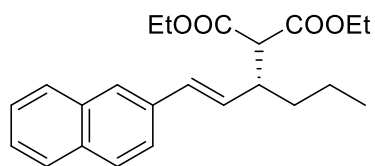

**3u**, <sup>13</sup>C NMR  
CDCl<sub>3</sub>

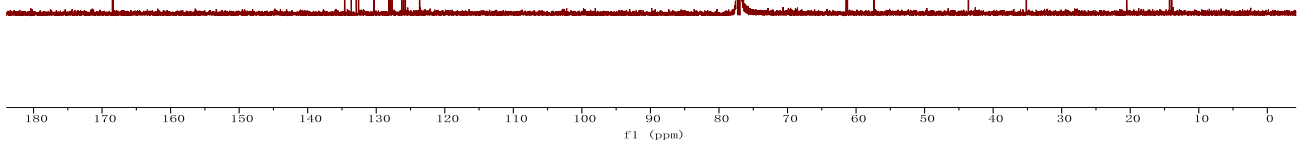

**Supplementary Fig. 111.** <sup>1</sup>H NMR and <sup>13</sup>C NMR spectra of compound **3u**.

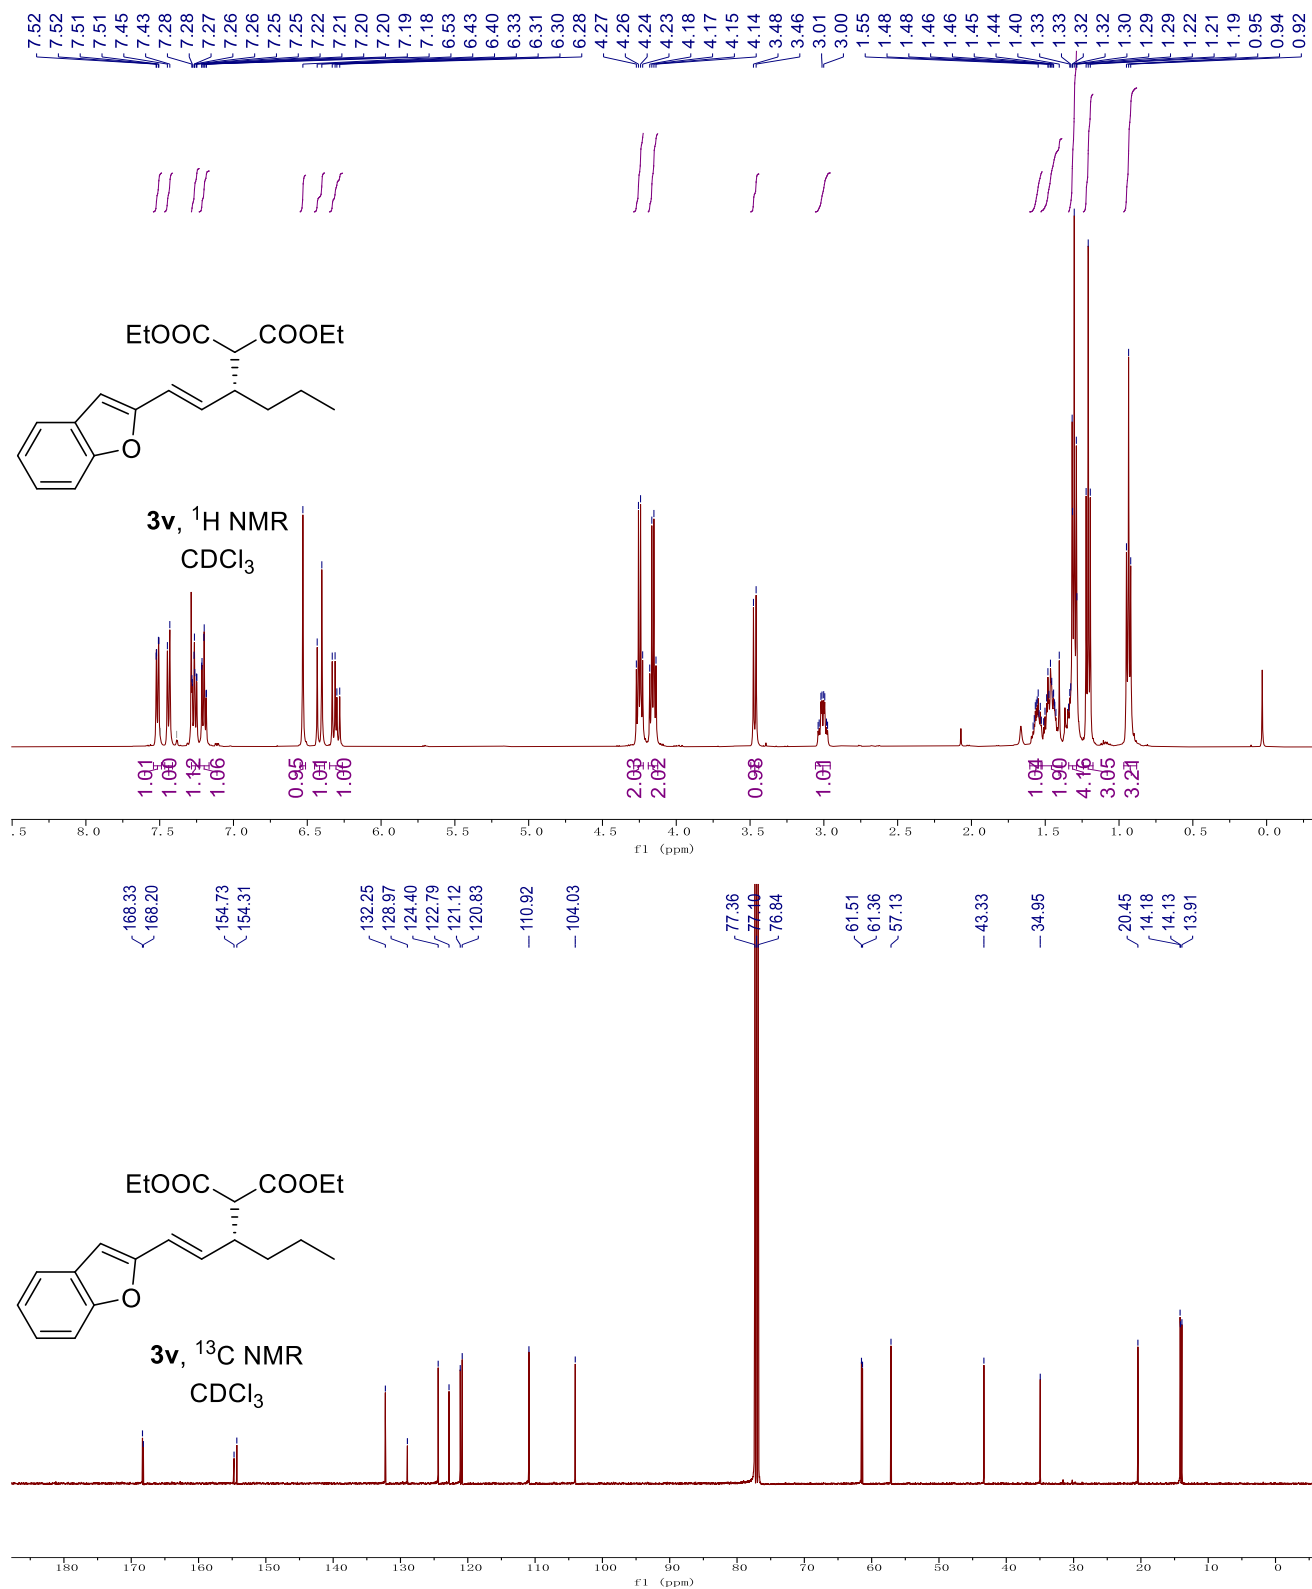

Supplementary Fig. 112. <sup>1</sup>H NMR and <sup>13</sup>C NMR spectra of compound **3v**.

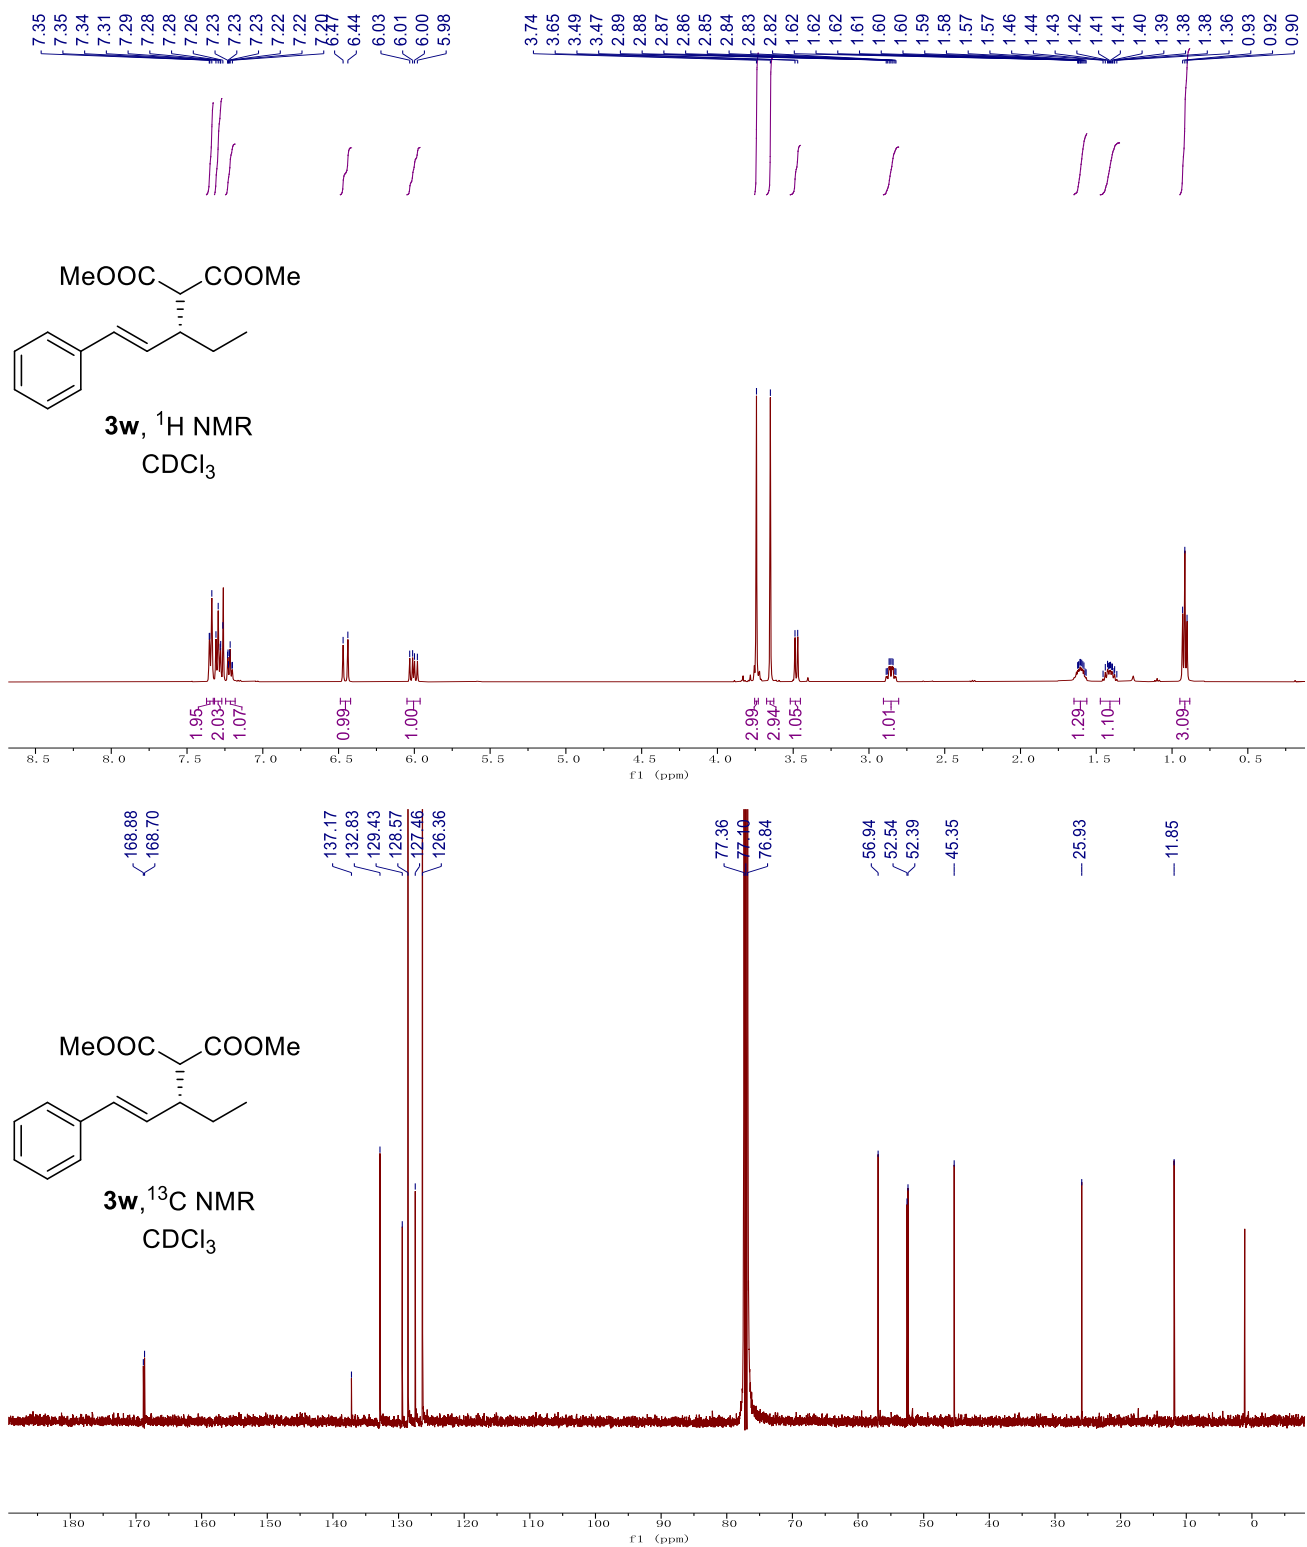

Supplementary Fig. 113.  $^1\text{H}$  NMR and  $^{13}\text{C}$  NMR spectra of compound **3w**.

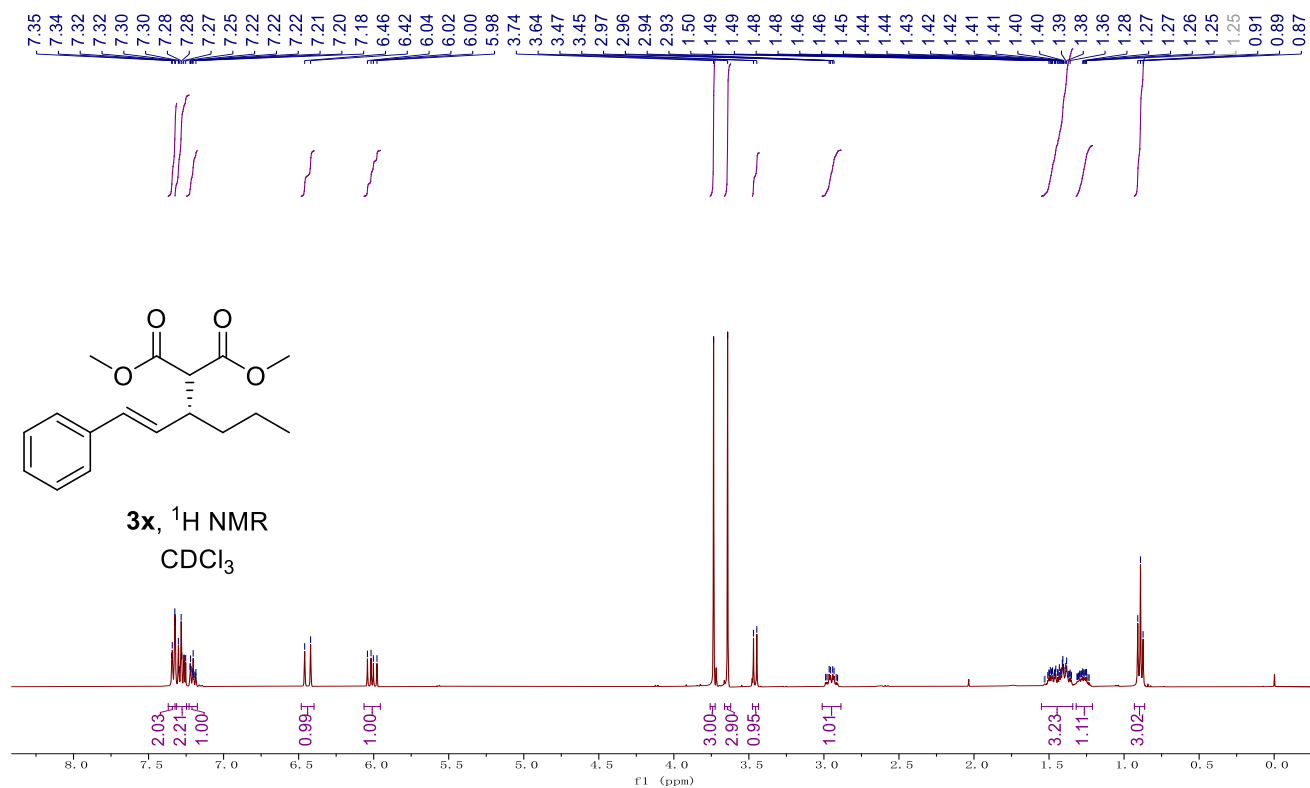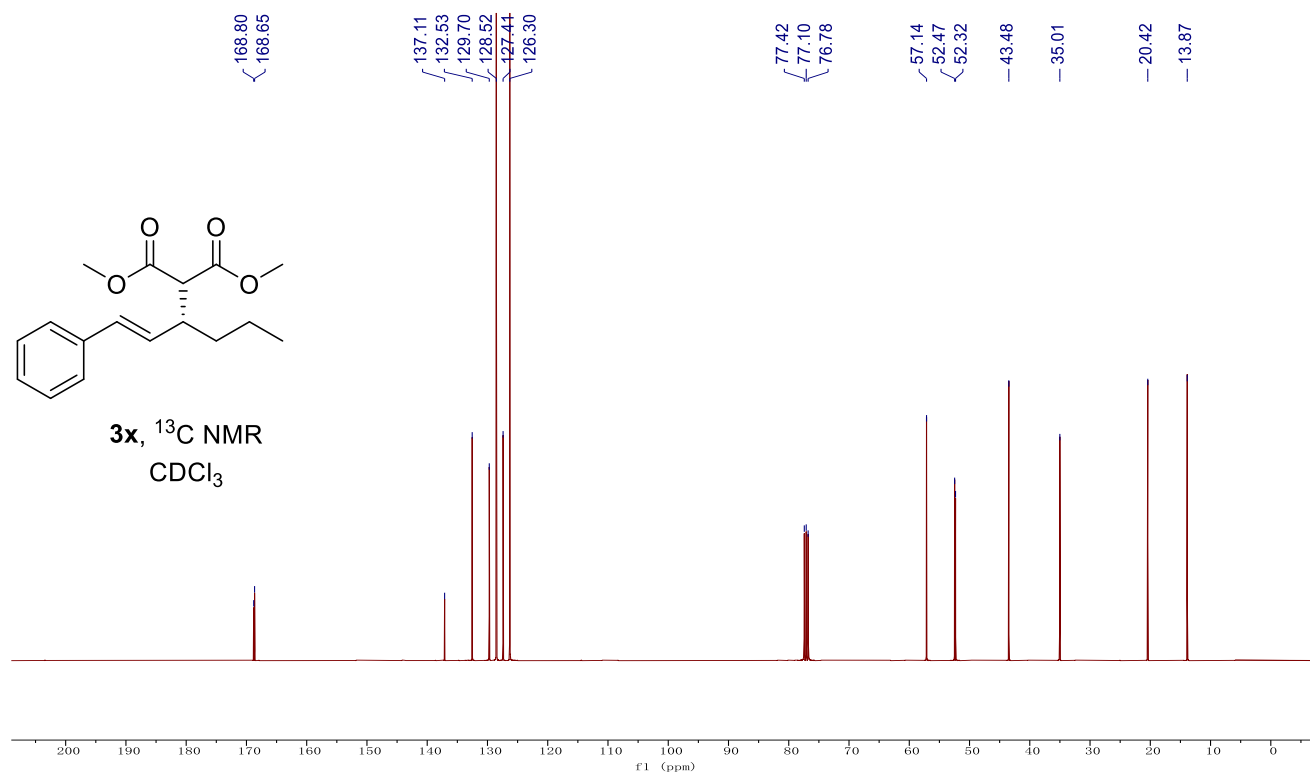

**Supplementary Fig. 114.** <sup>1</sup>H NMR and <sup>13</sup>C NMR spectra of compound **3x**.

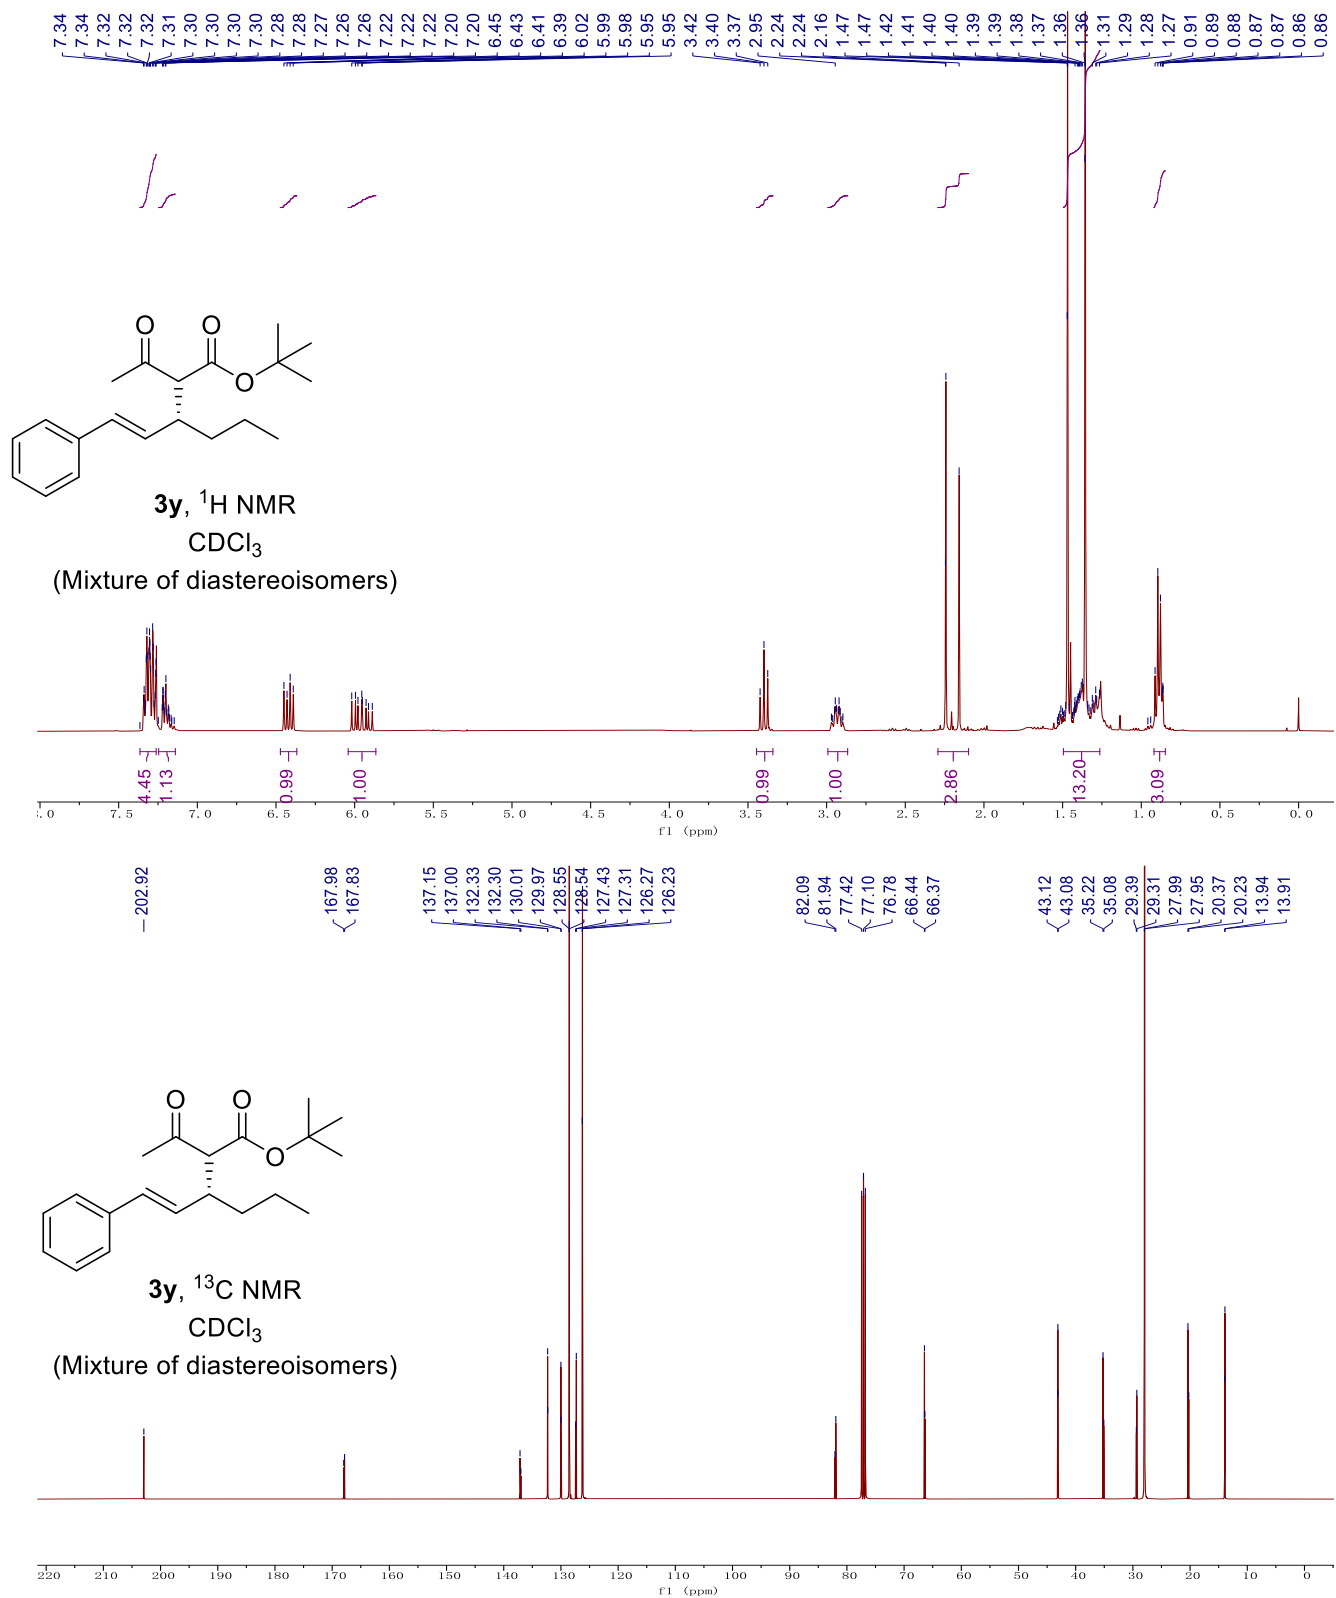

**Supplementary Fig. 115.**  $^1\text{H}$  NMR and  $^{13}\text{C}$  NMR spectra of compound **3y**.

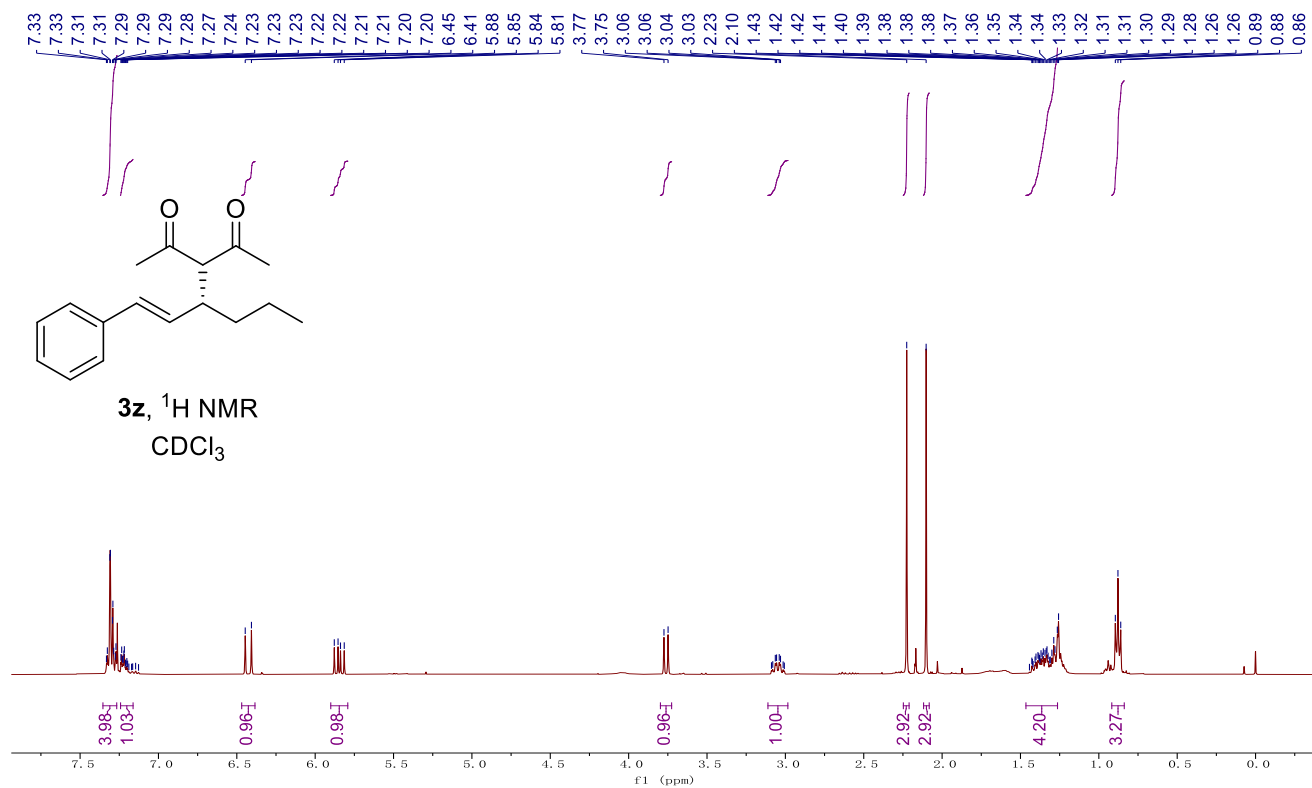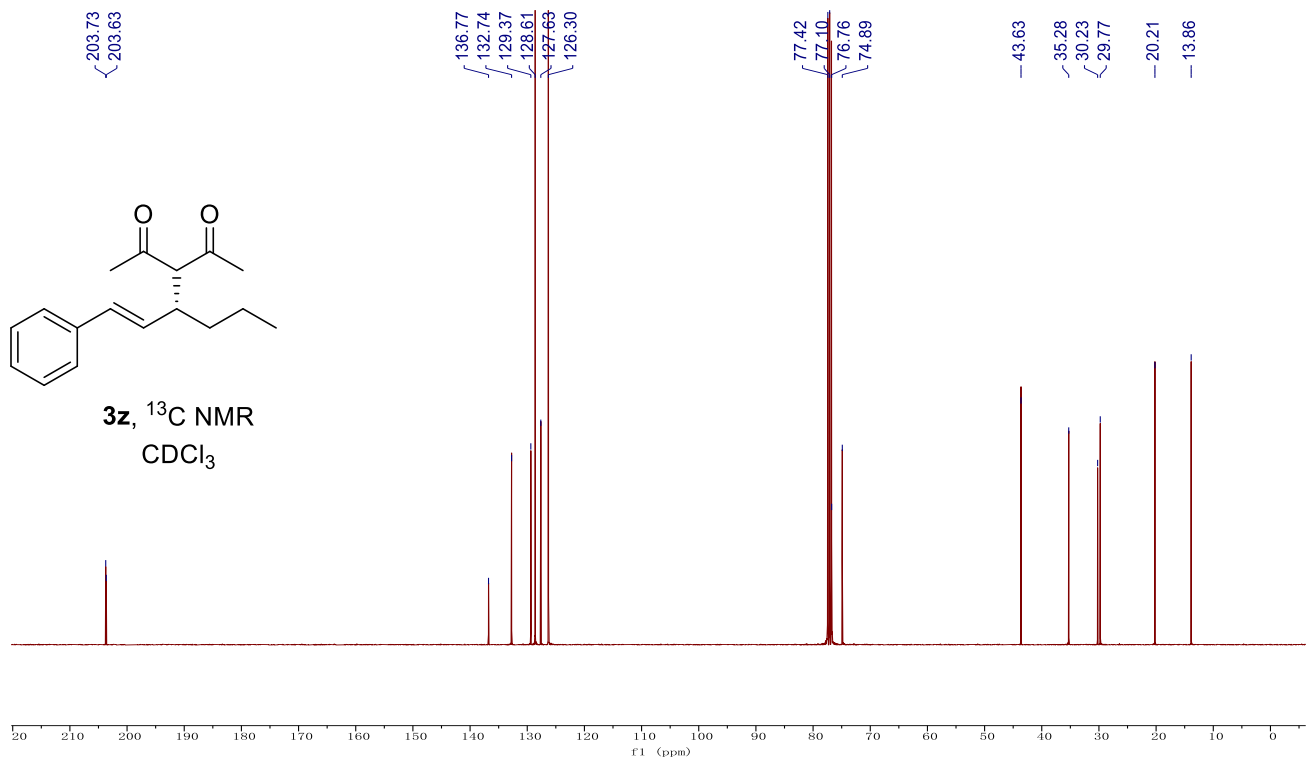

**Supplementary Fig. 116.** <sup>1</sup>H NMR and <sup>13</sup>C NMR spectra of compound **3z**.

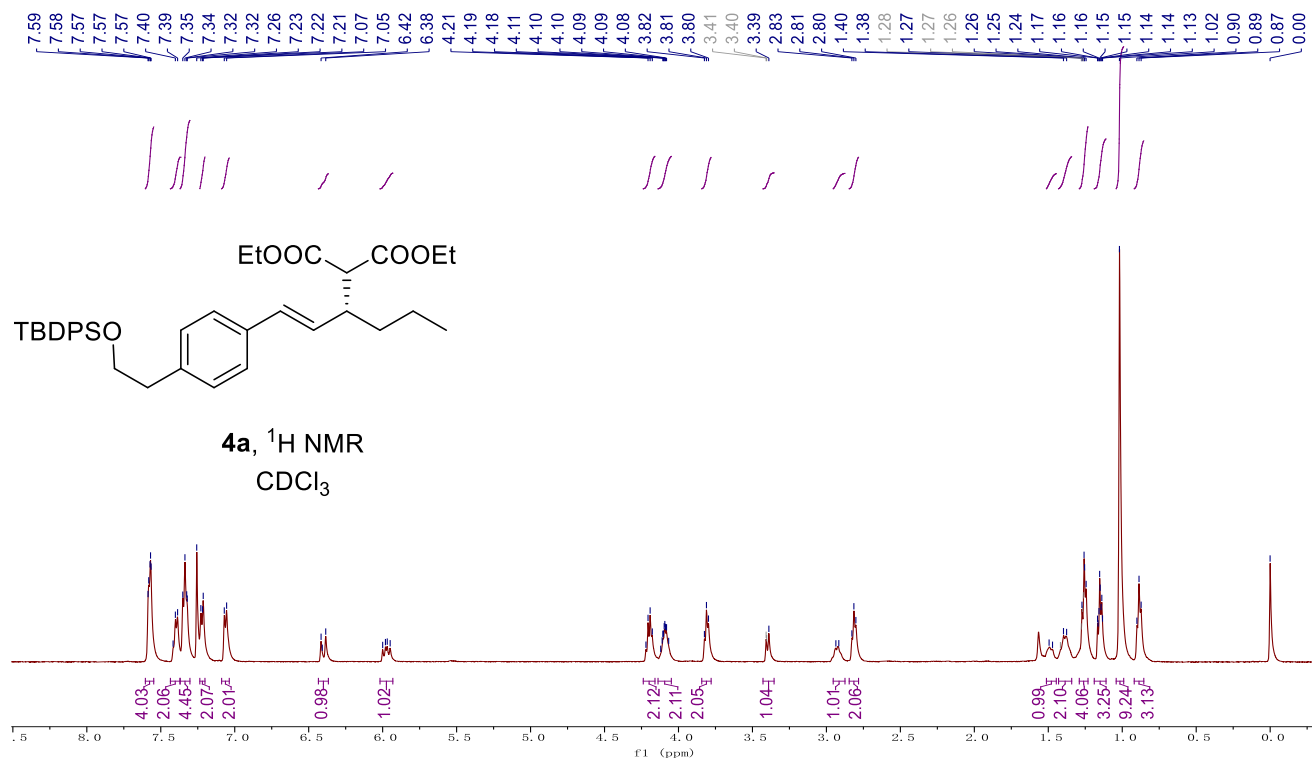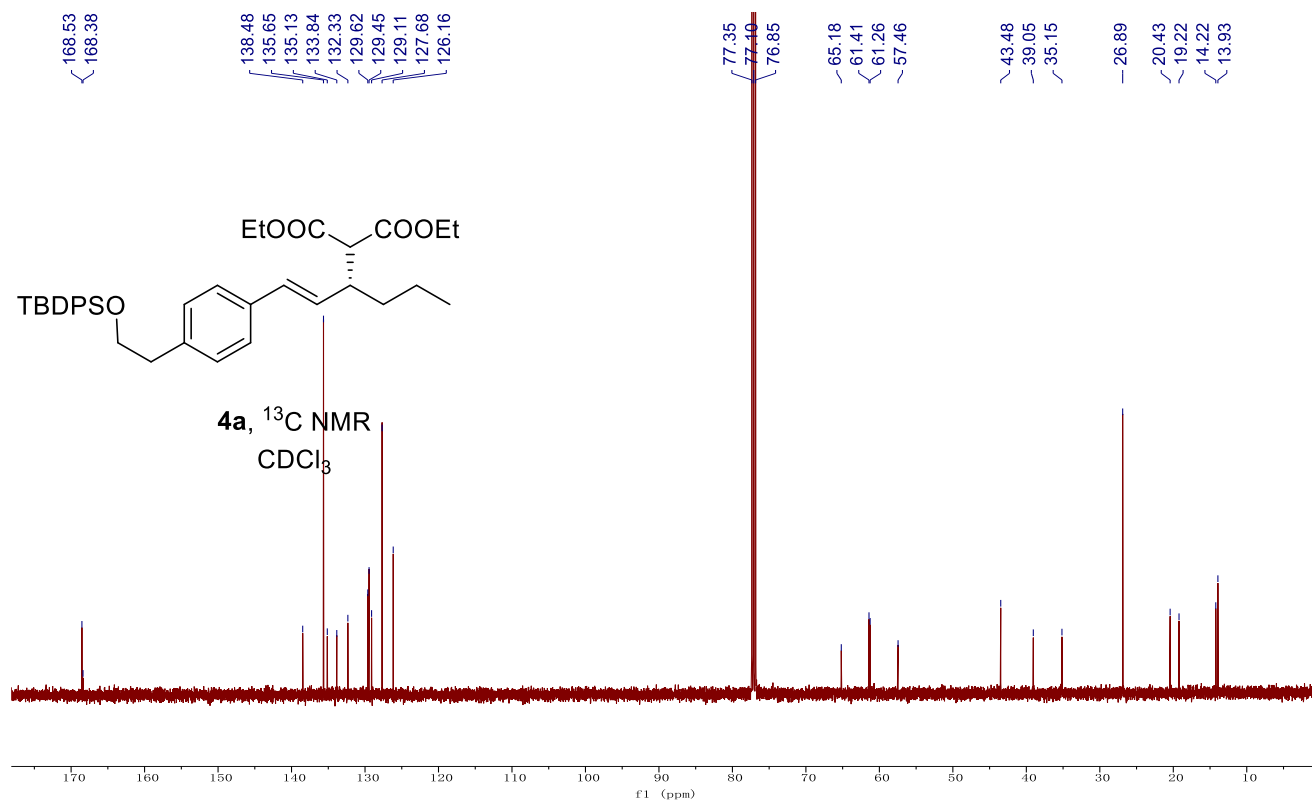

Supplementary Fig. 117.  $^1\text{H}$  NMR and  $^{13}\text{C}$  NMR spectra of compound **4a**.



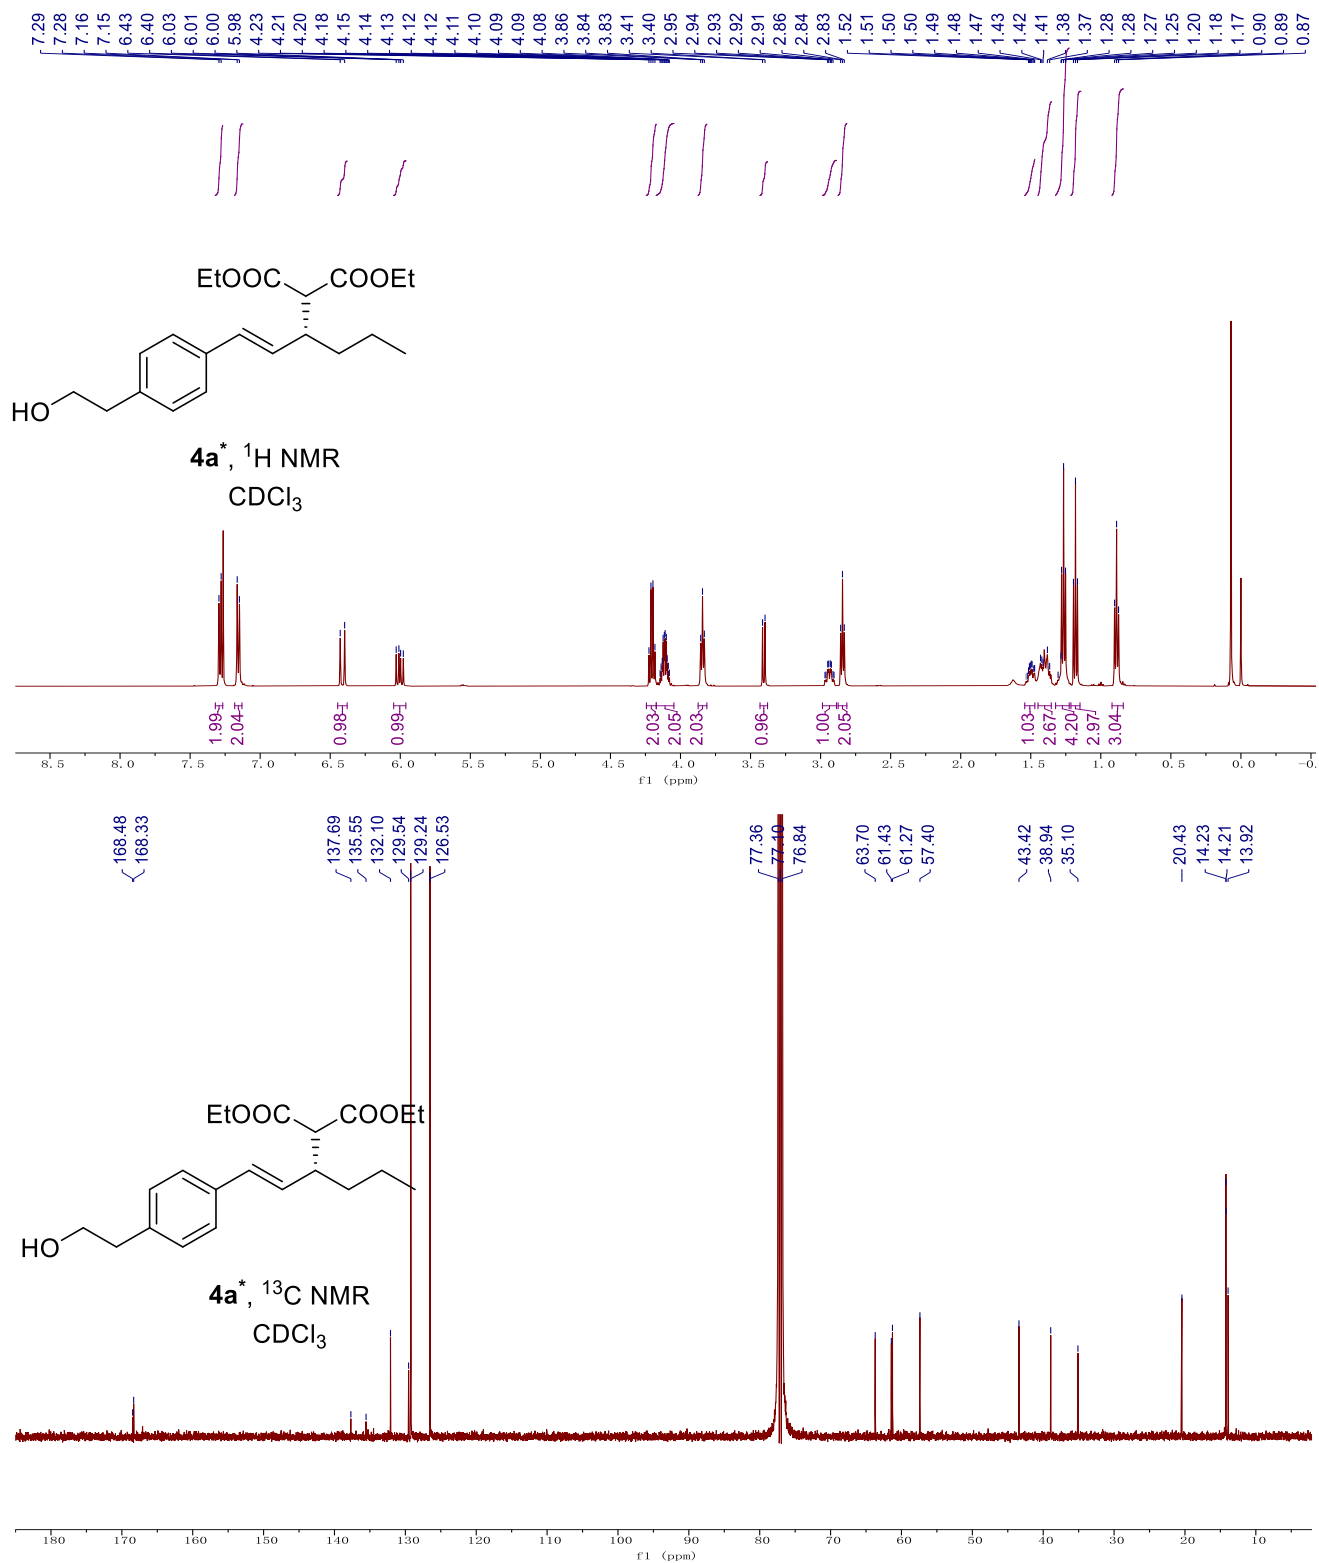

Supplementary Fig. 118.  $^1\text{H NMR}$  and  $^{13}\text{C NMR}$  spectra of compound **4a'**.

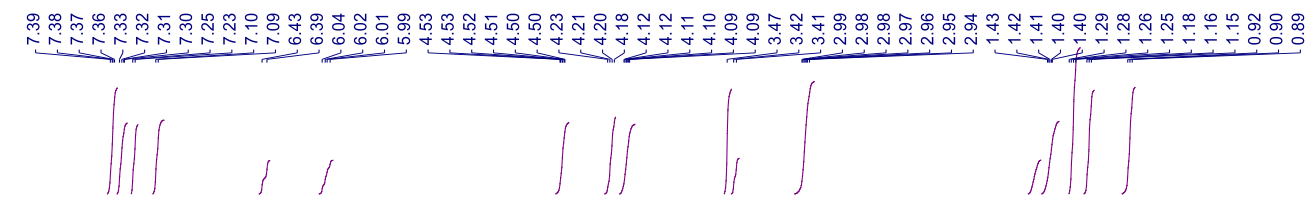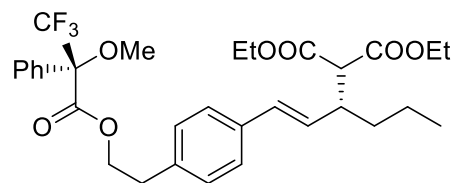

**4b, <sup>1</sup>H NMR**  
CDCl<sub>3</sub>

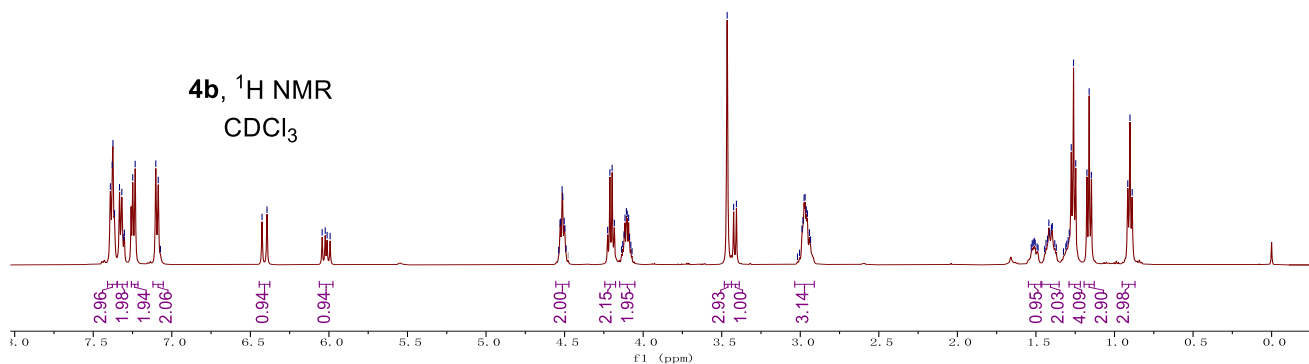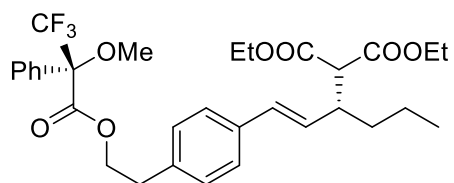

**4b, <sup>13</sup>C NMR**  
CDCl<sub>3</sub>

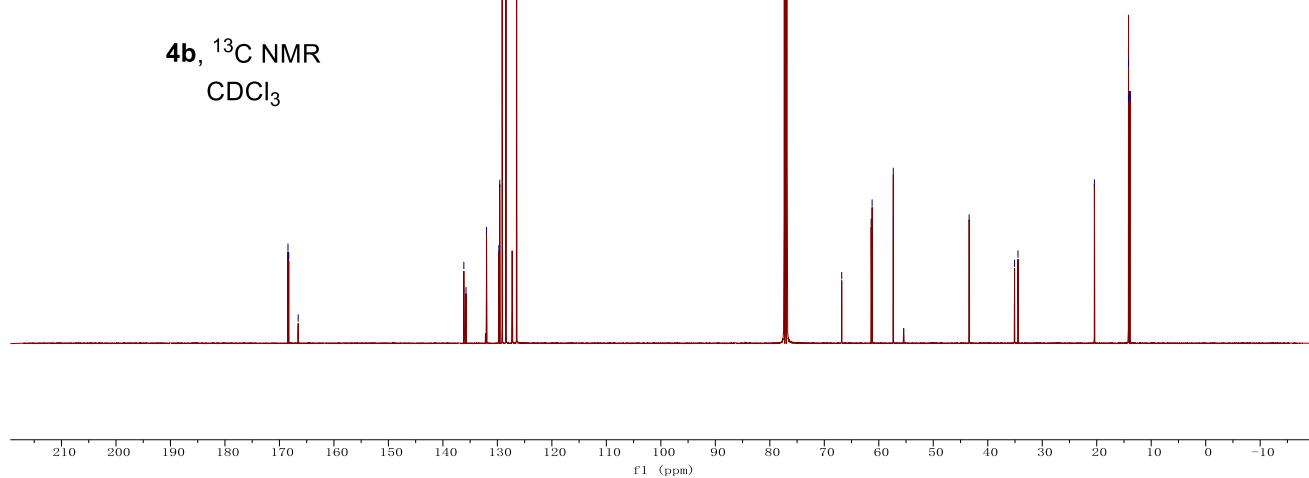

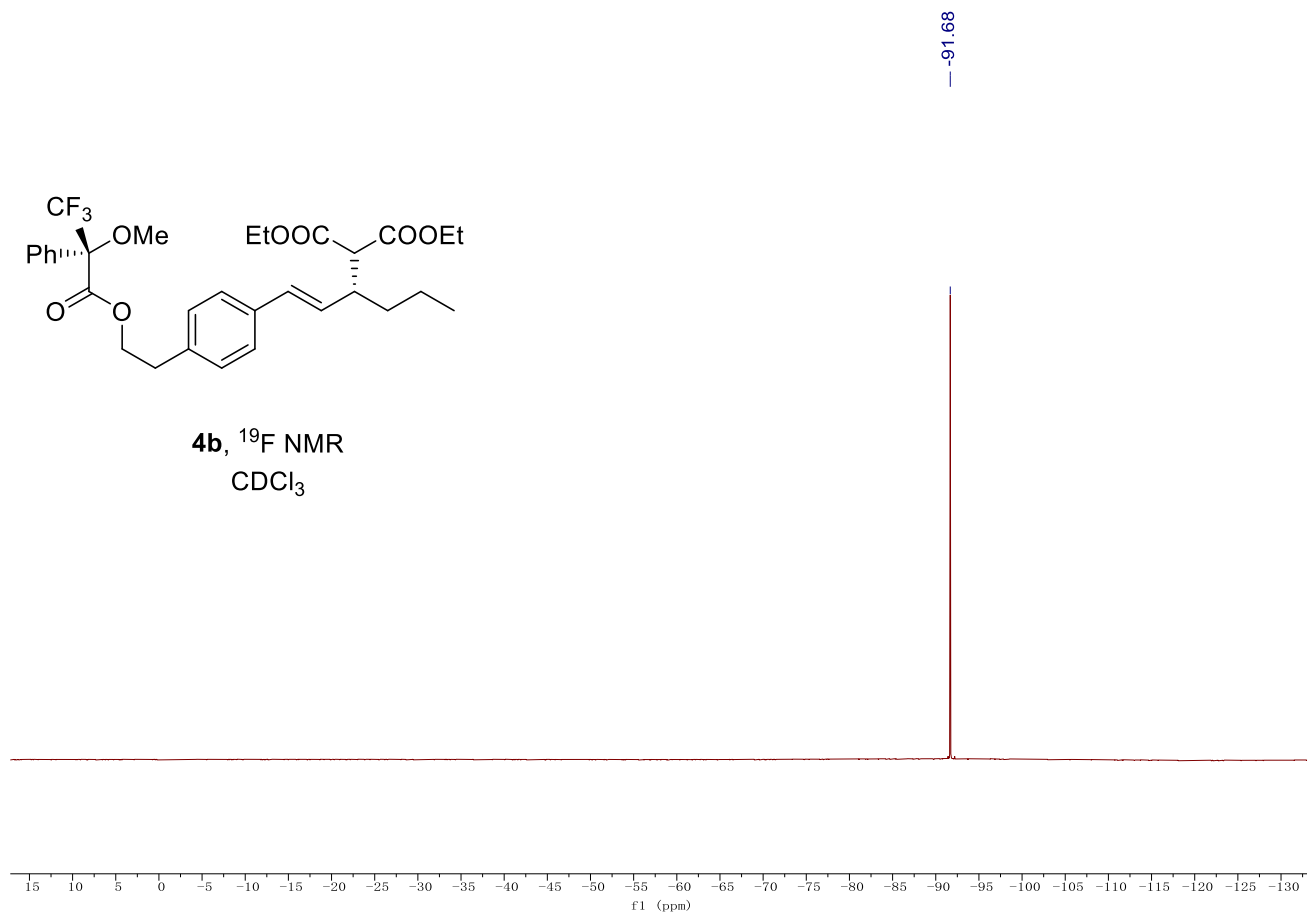

**Supplementary Fig. 119.**  $^1\text{H}$  NMR,  $^{13}\text{C}$  NMR and  $^{19}\text{F}$  NMR spectra of compound **4b**.

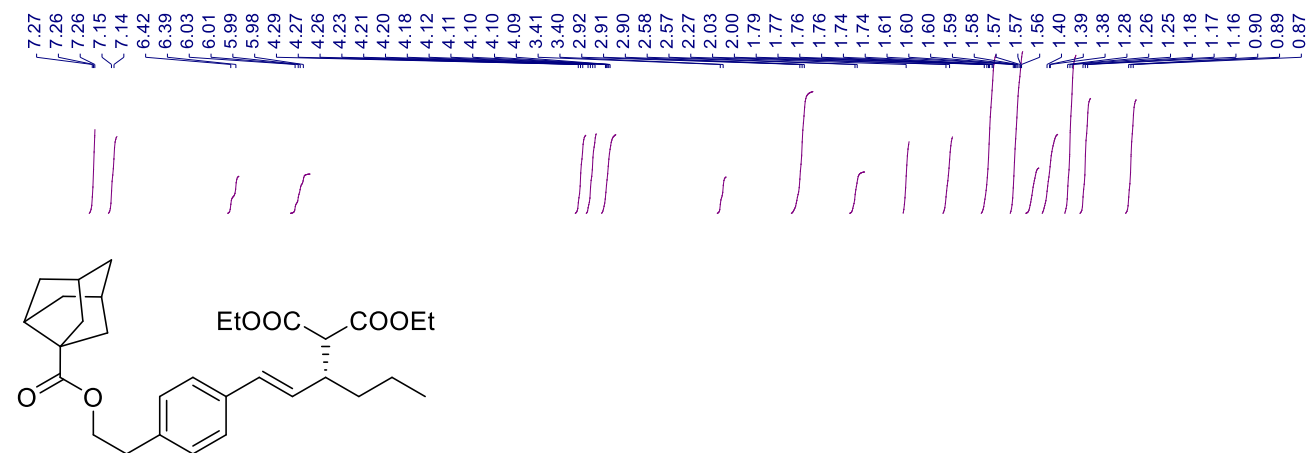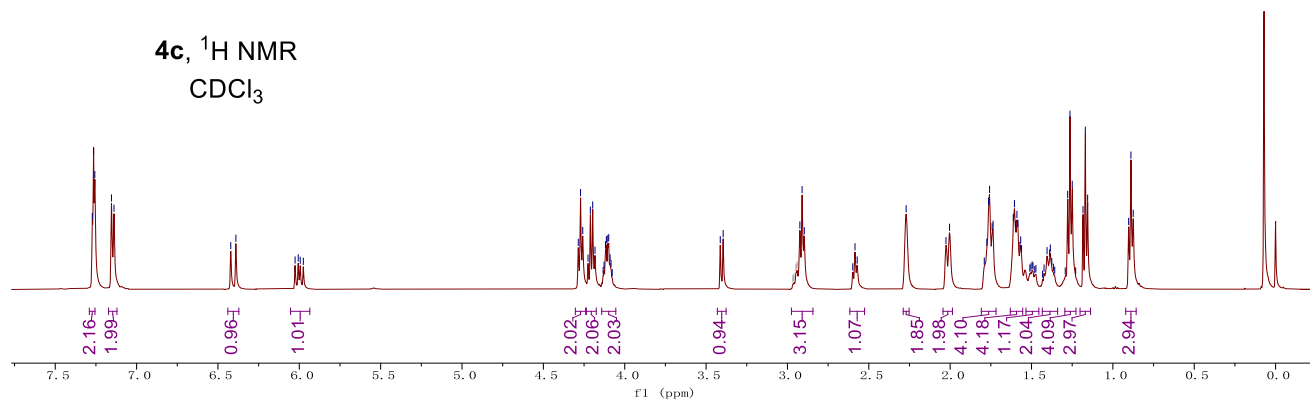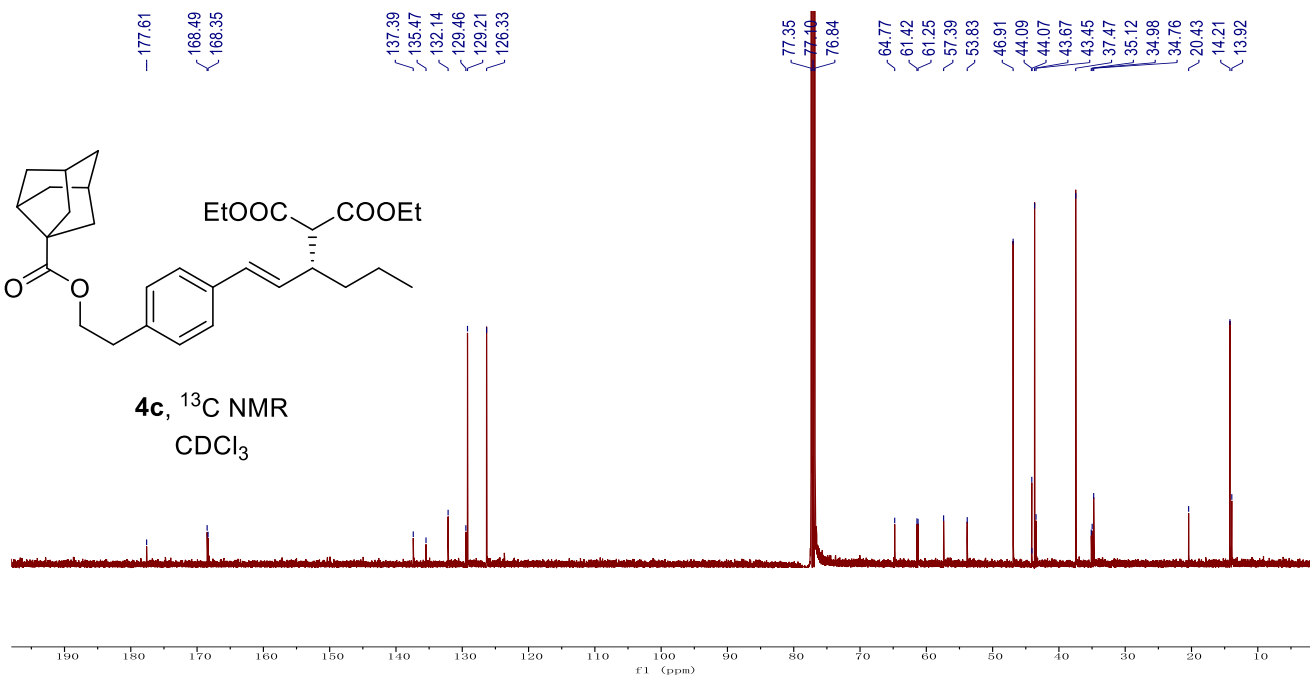

Supplementary Fig. 120.  $^1\text{H NMR}$  and  $^{13}\text{C NMR}$  spectra of compound **4c**.

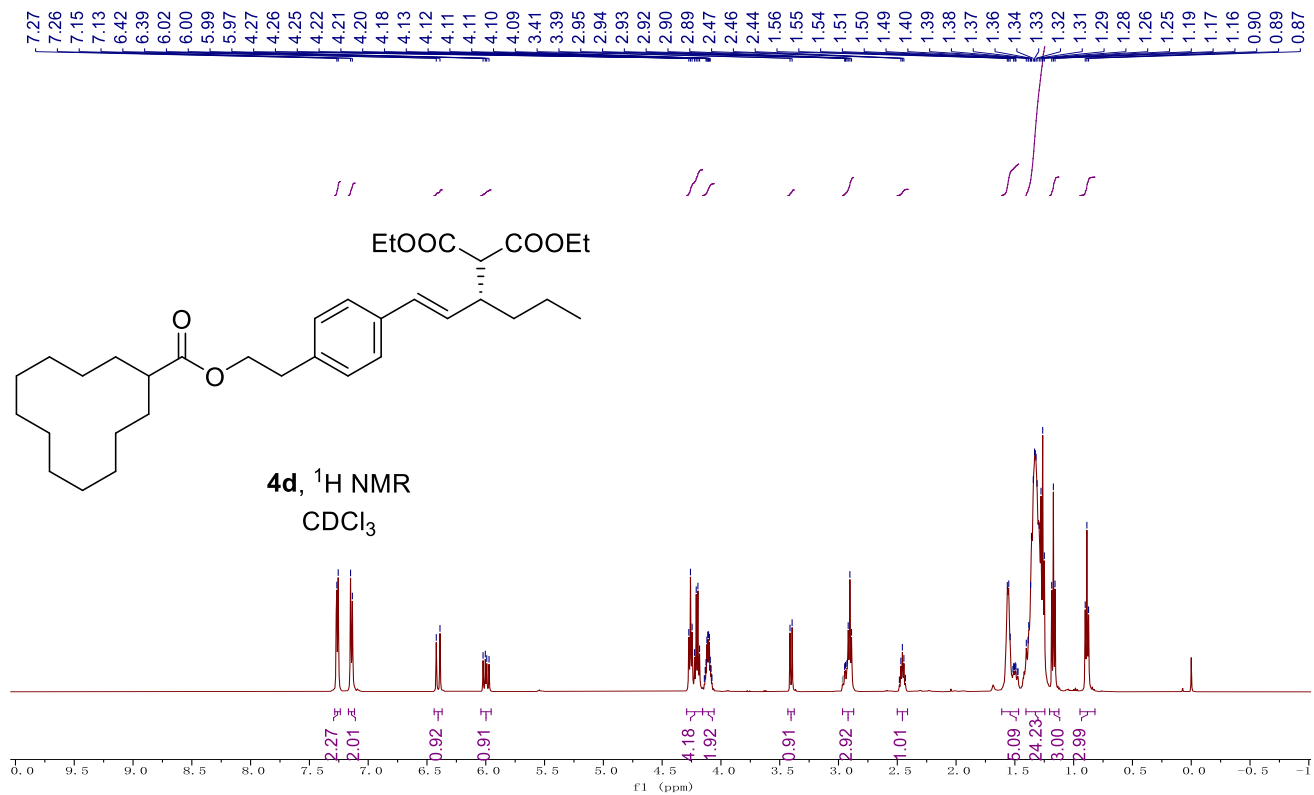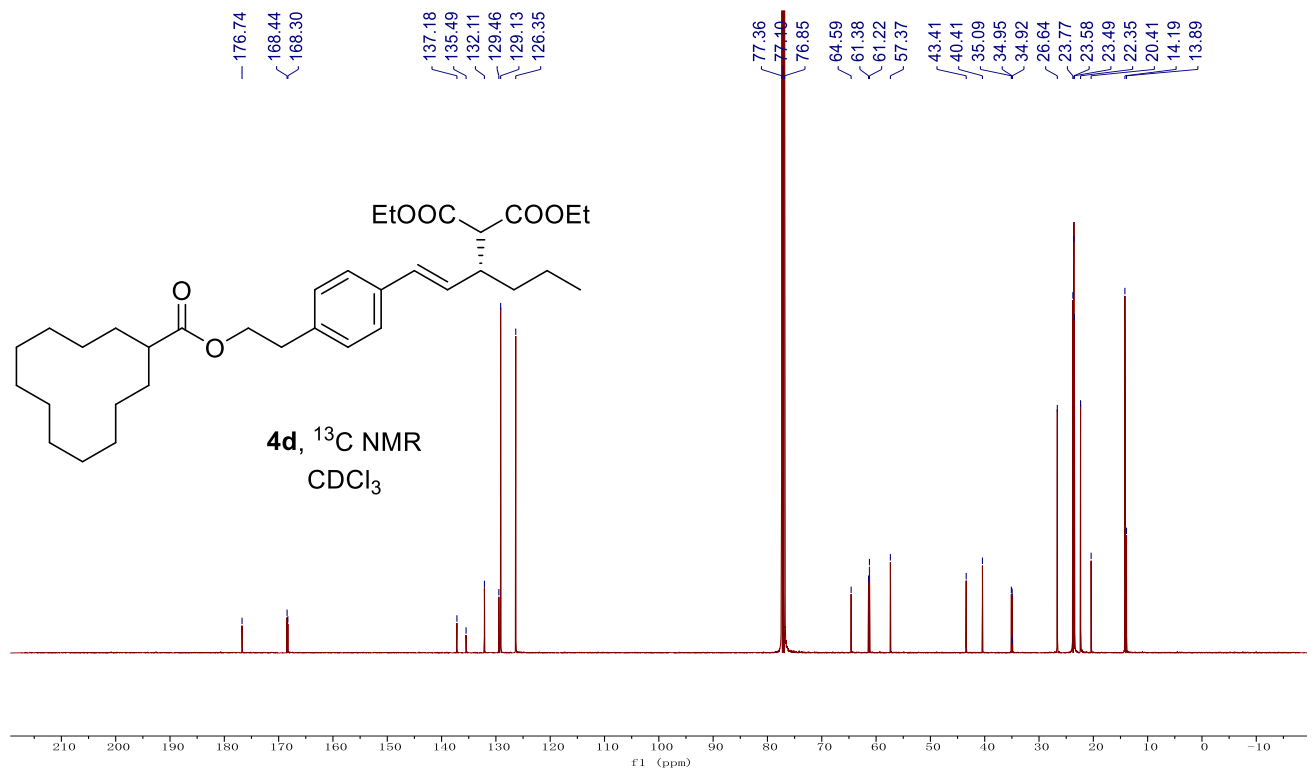

**Supplementary Fig. 121.**  $^1\text{H}$  NMR and  $^{13}\text{C}$  NMR spectra of compound **4d**.

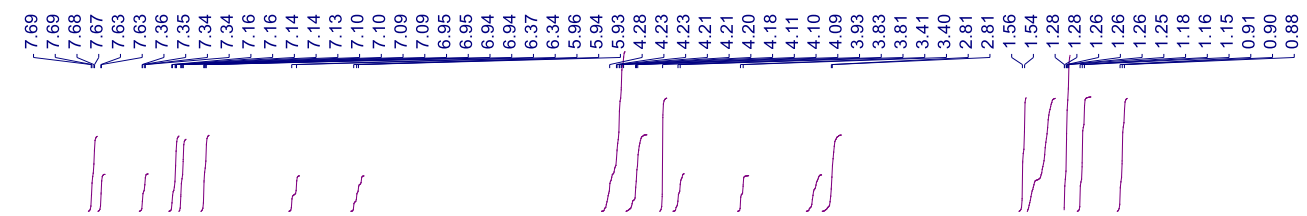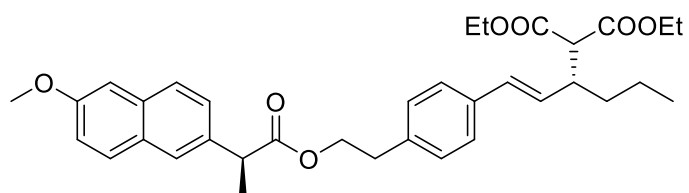

**4e**, <sup>1</sup>H NMR  
CDCl<sub>3</sub>

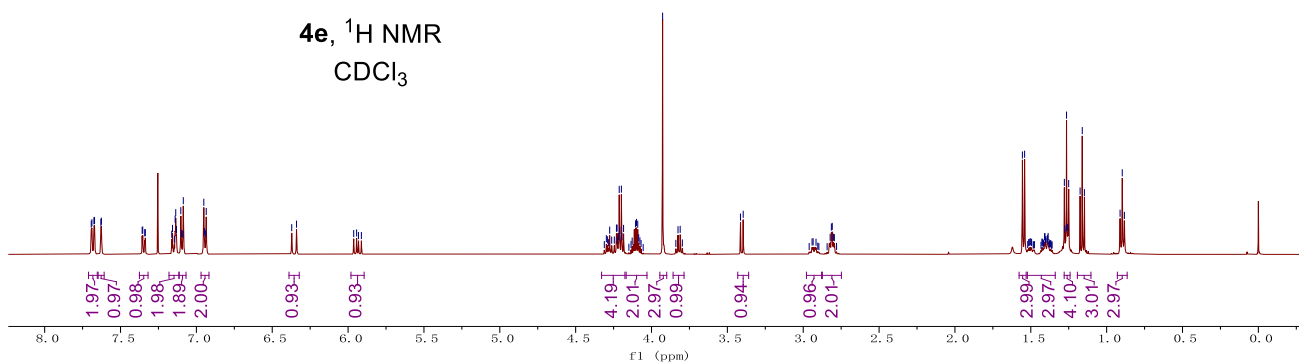

**4e**, <sup>13</sup>C NMR  
CDCl<sub>3</sub>

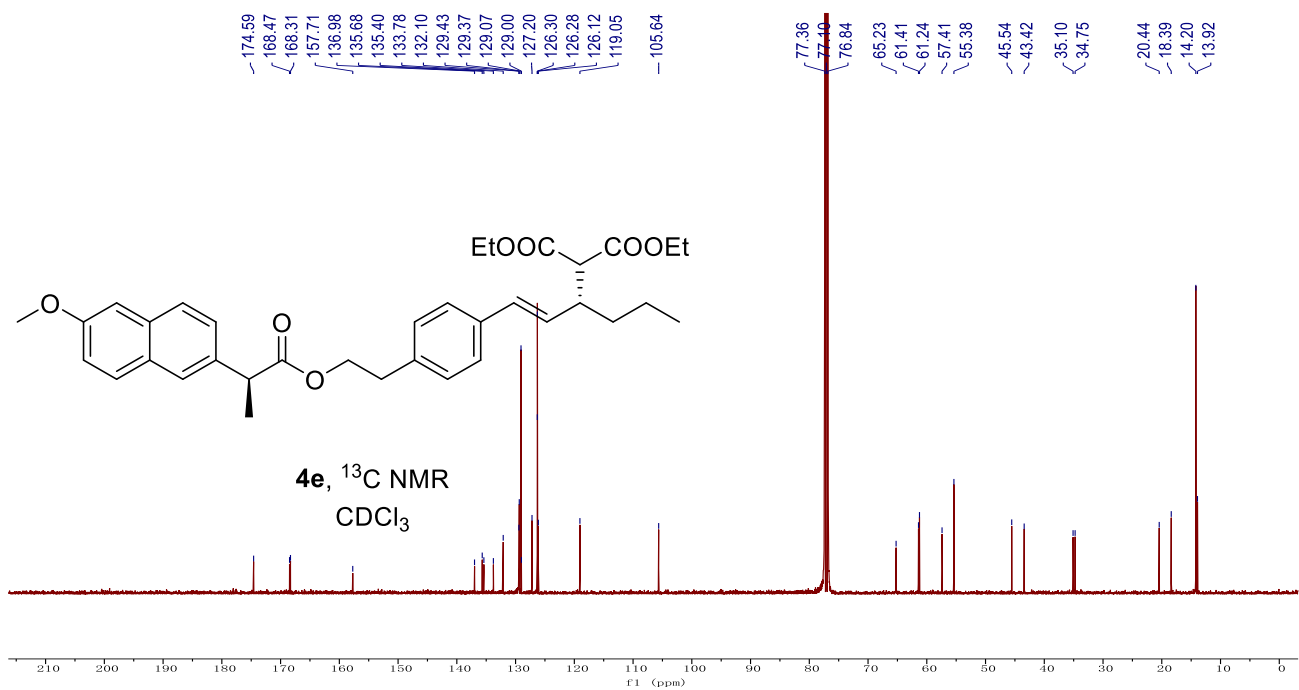

**Supplementary Fig. 122.** <sup>1</sup>H NMR and <sup>13</sup>C NMR spectra of compound **4e**.

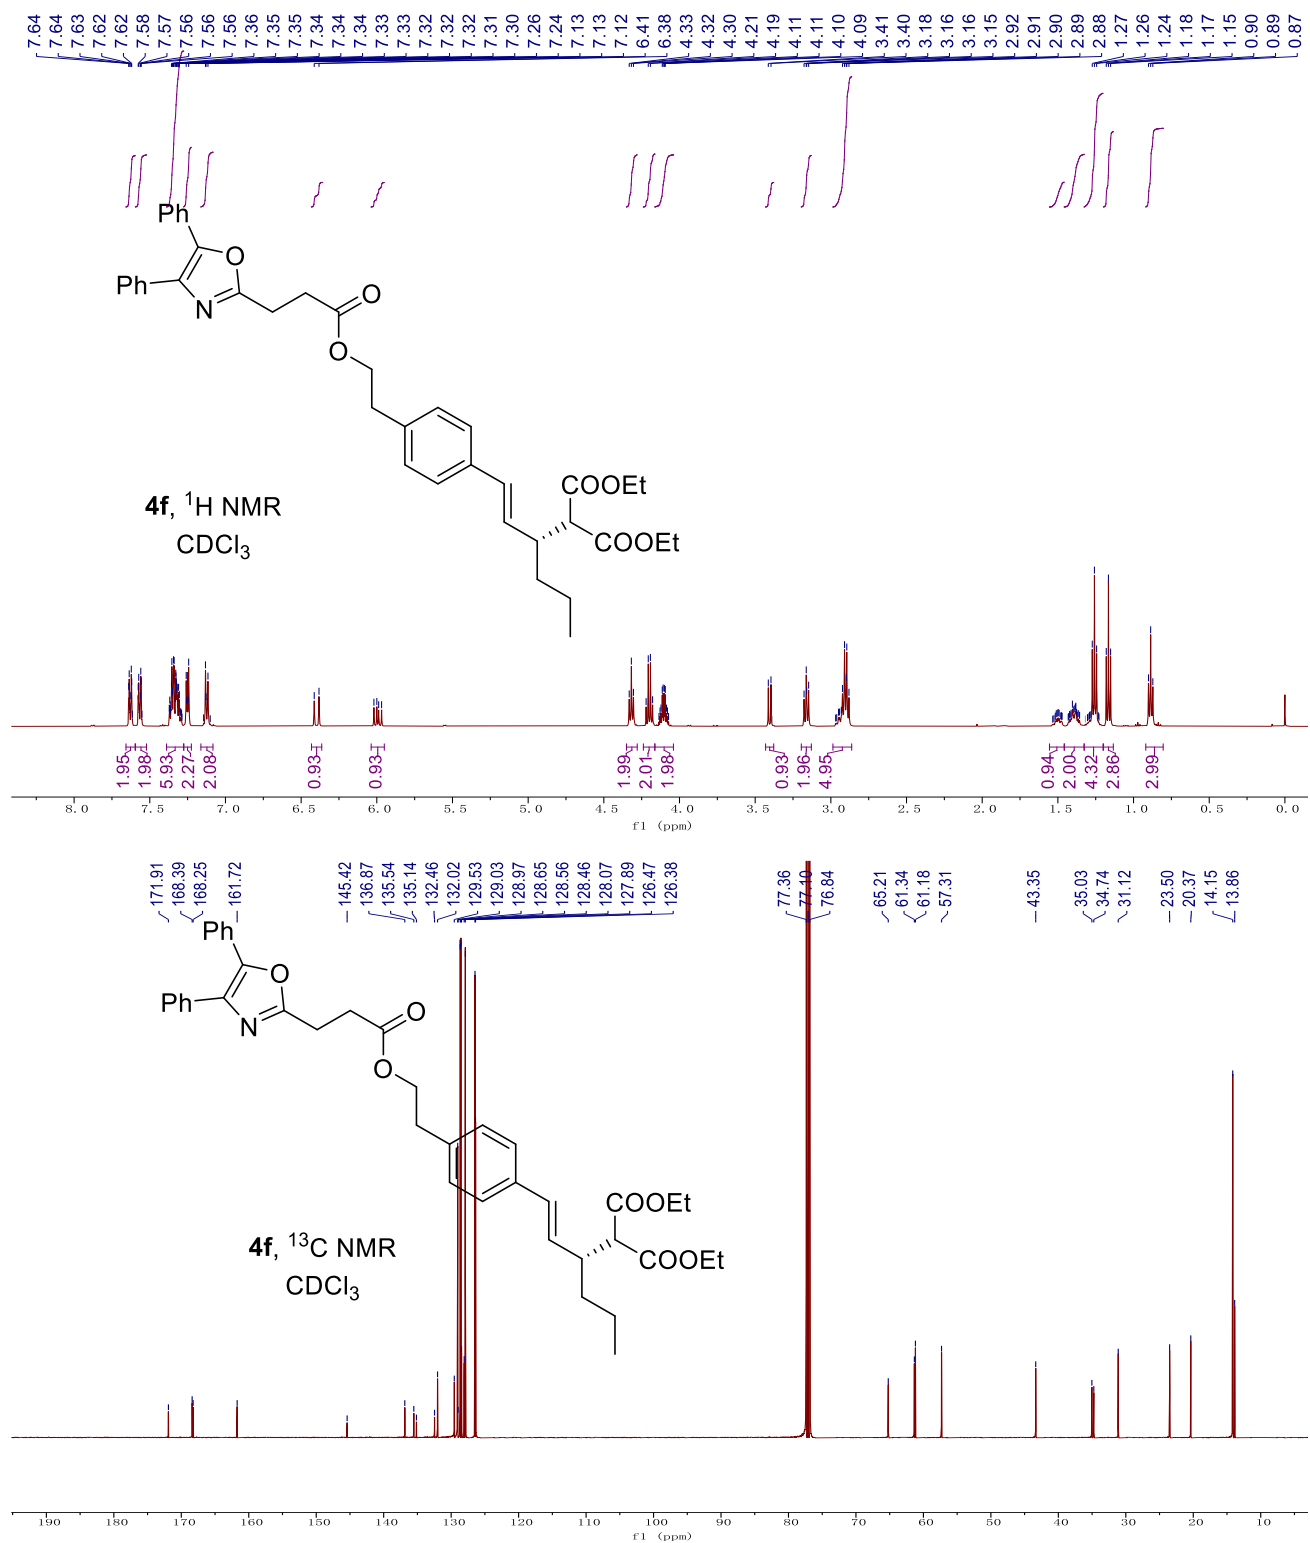

**Supplementary Fig. 123.** <sup>1</sup>H NMR and <sup>13</sup>C NMR spectra of compound **4f**.

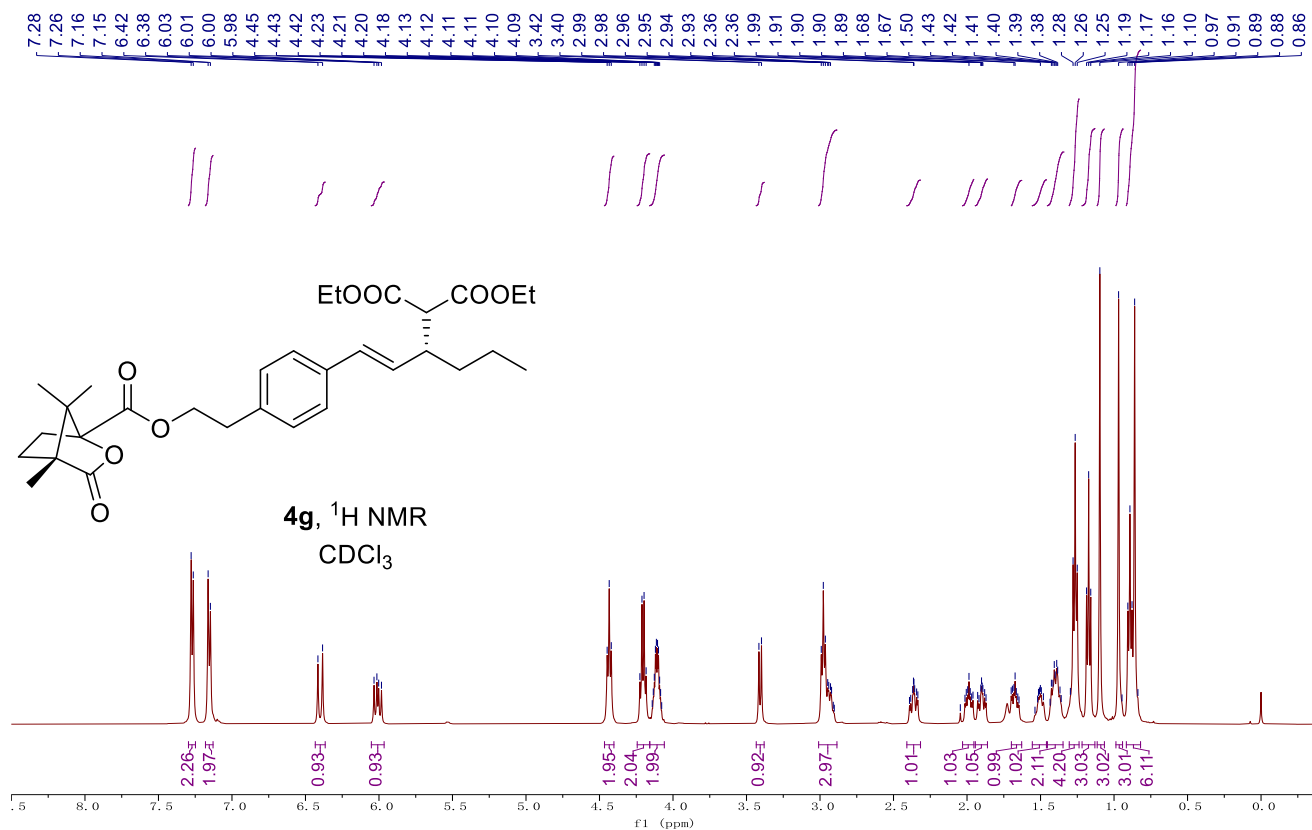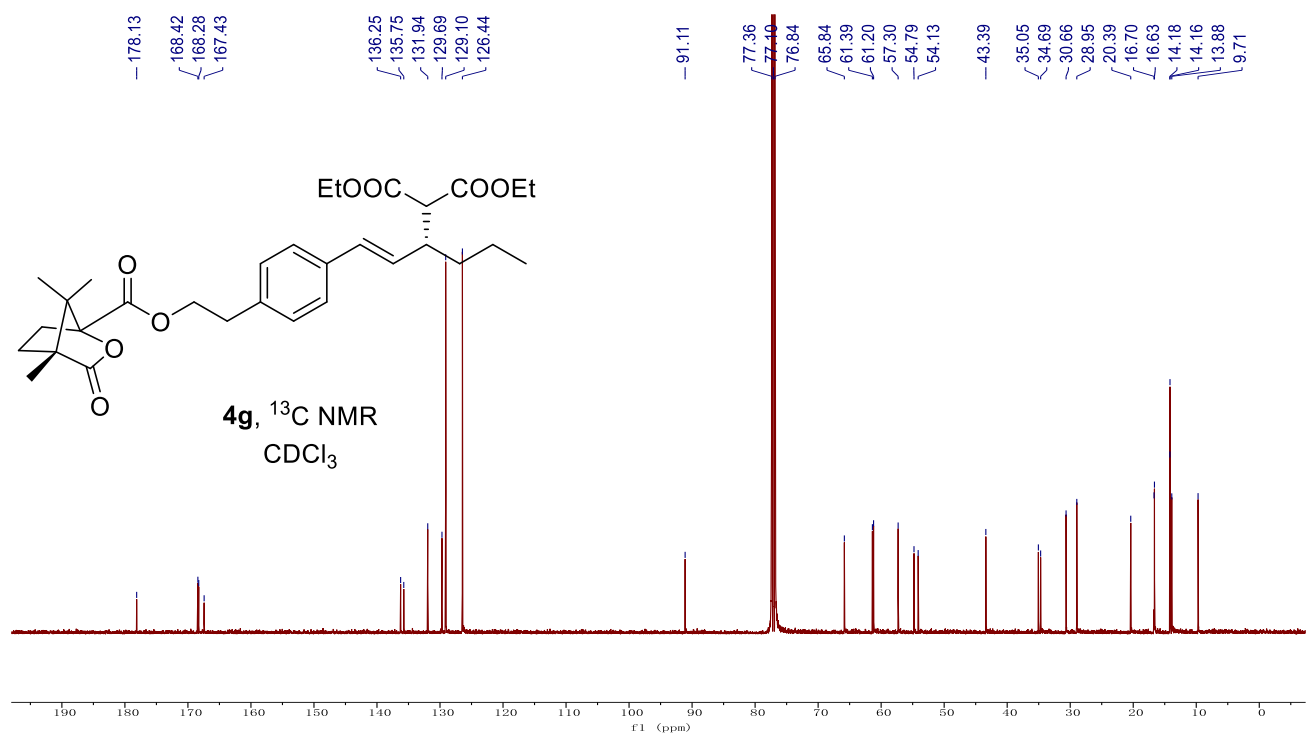

**Supplementary Fig. 124.** <sup>1</sup>H NMR and <sup>13</sup>C NMR spectra of compound **4g**.



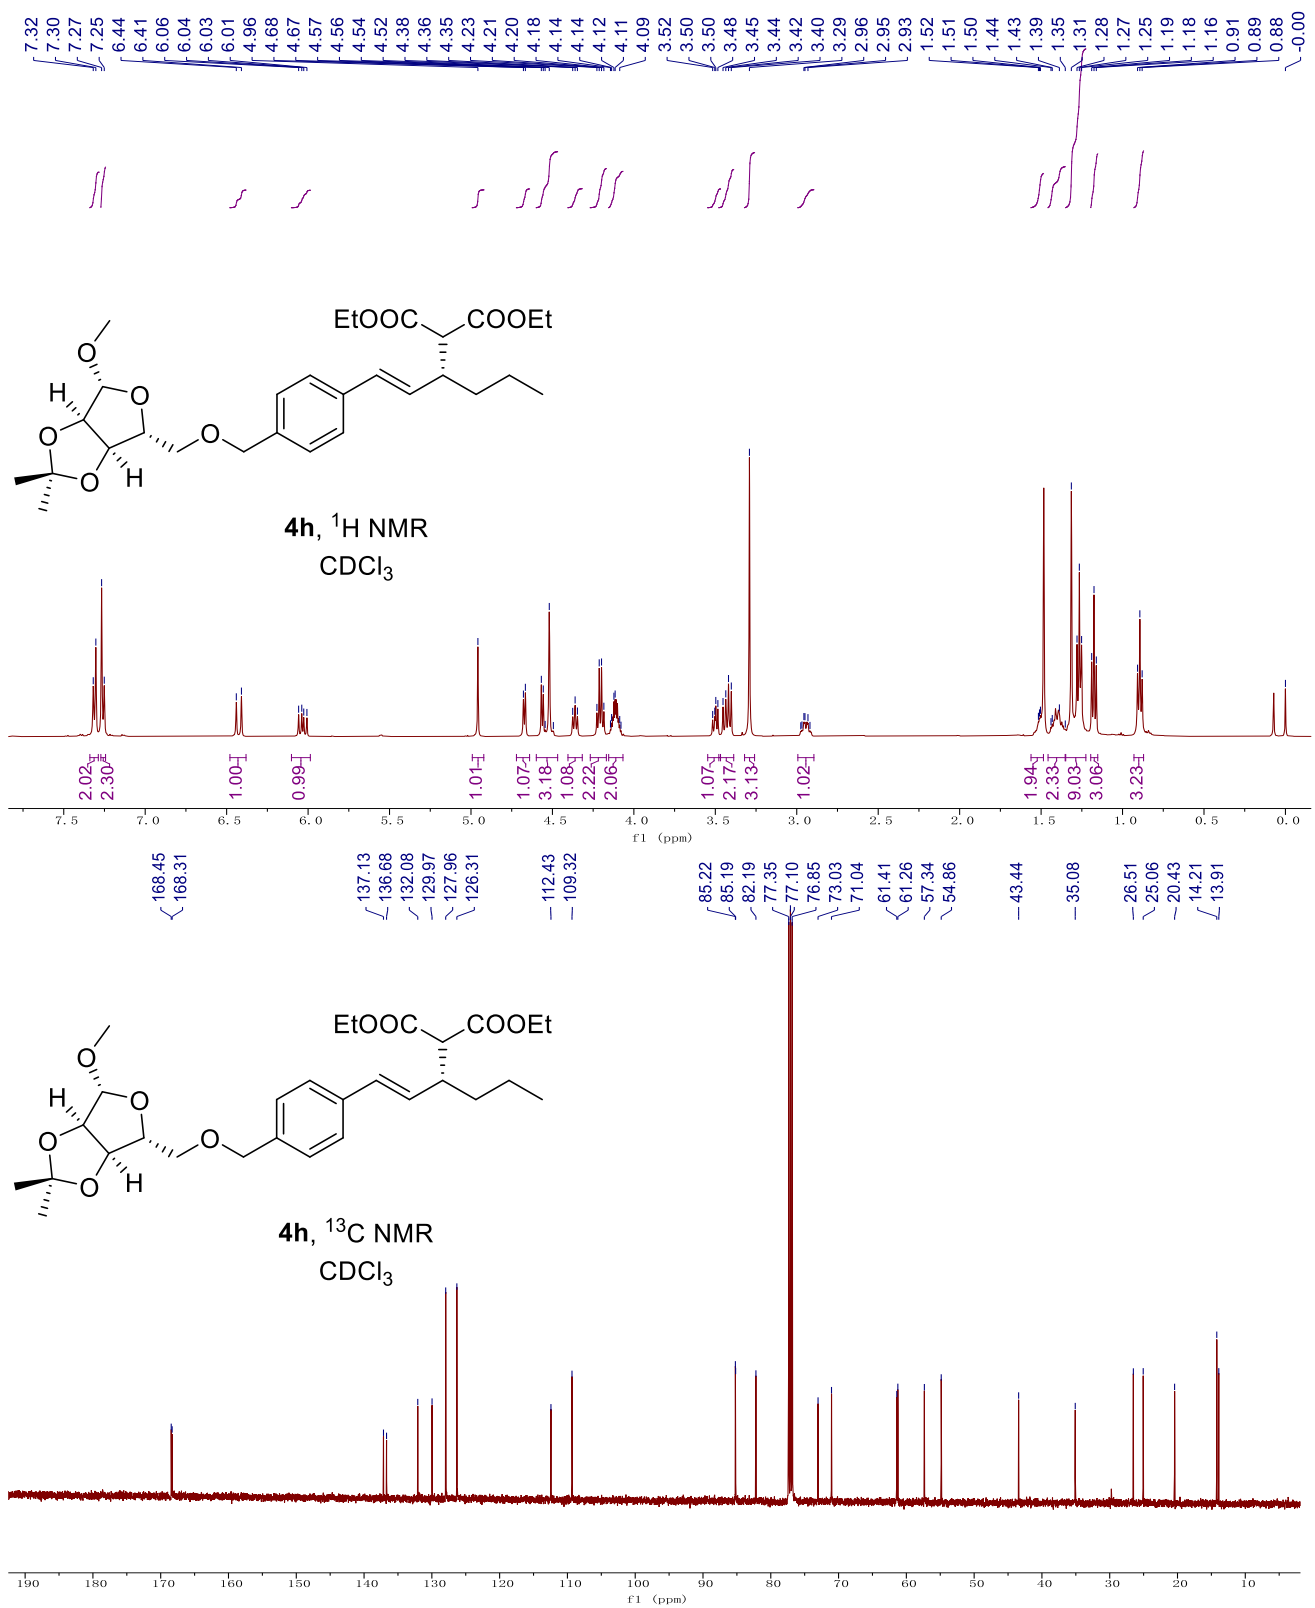

Supplementary Fig. 125. <sup>1</sup>H NMR and <sup>13</sup>C NMR spectra of compound 4h.

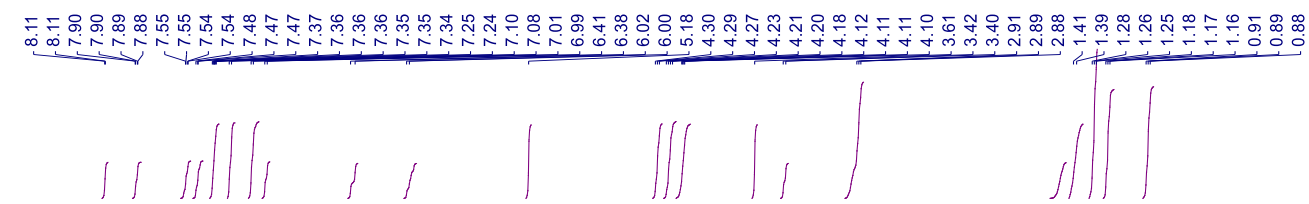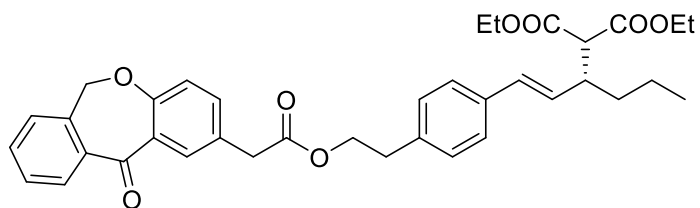

**4i**, <sup>1</sup>H NMR  
CDCl<sub>3</sub>

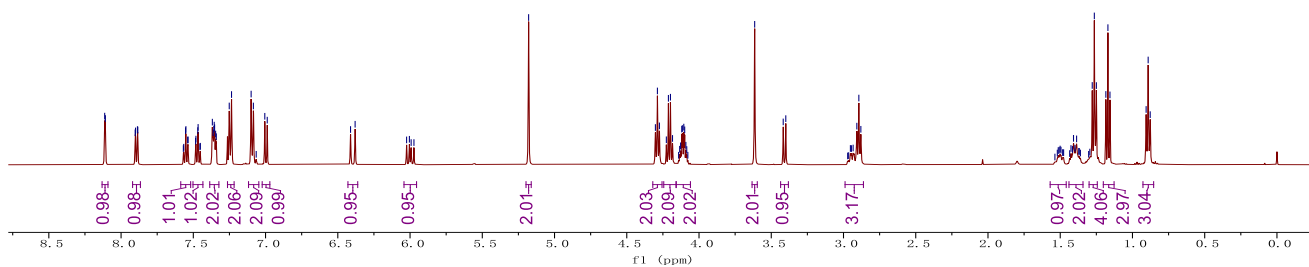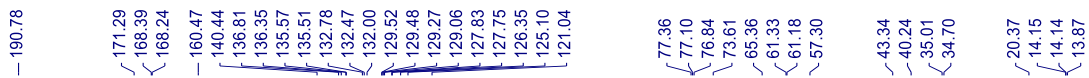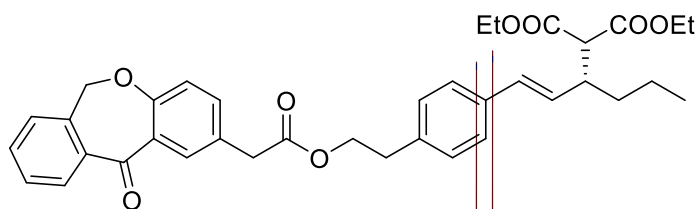

**4i**, <sup>13</sup>C NMR  
CDCl<sub>3</sub>

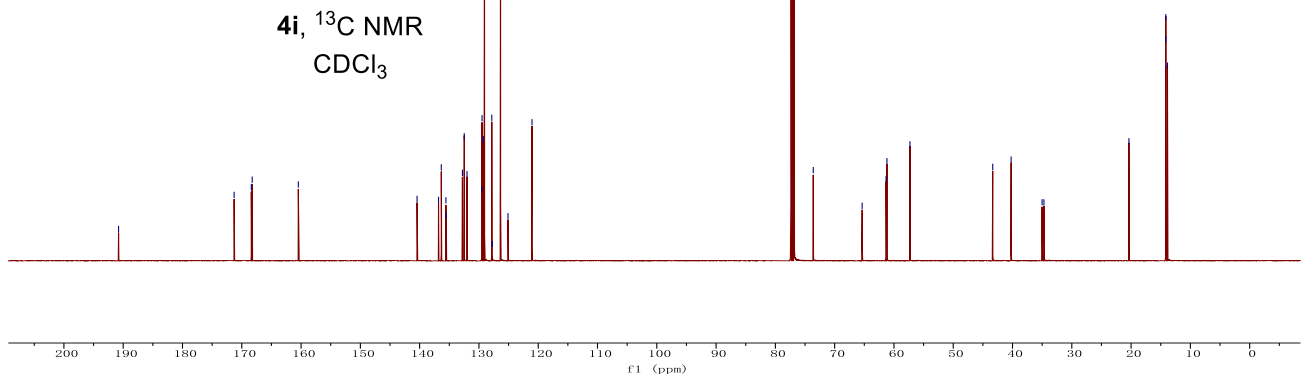

**Supplementary Fig. 126.** <sup>1</sup>H NMR and <sup>13</sup>C NMR spectra of compound **4i**.

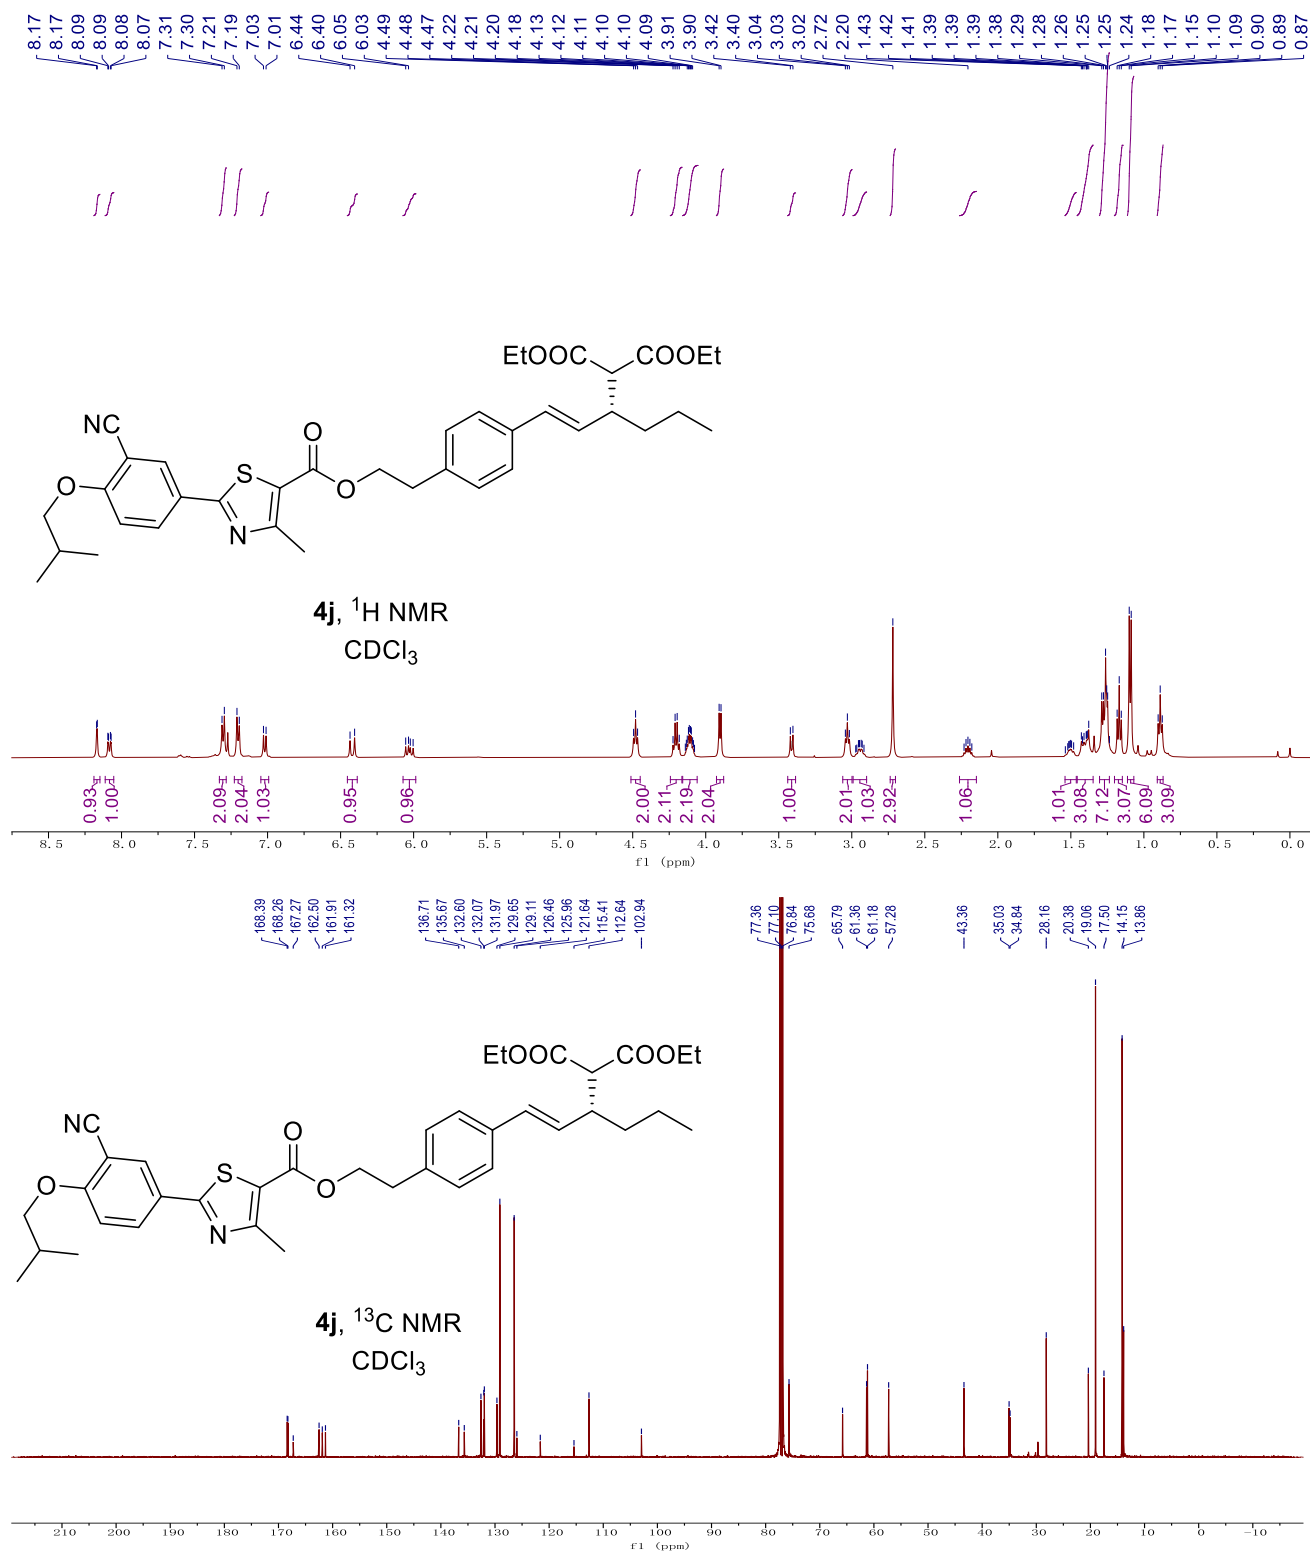

**Supplementary Fig. 127.** <sup>1</sup>H NMR and <sup>13</sup>C NMR spectra of compound **4j**.

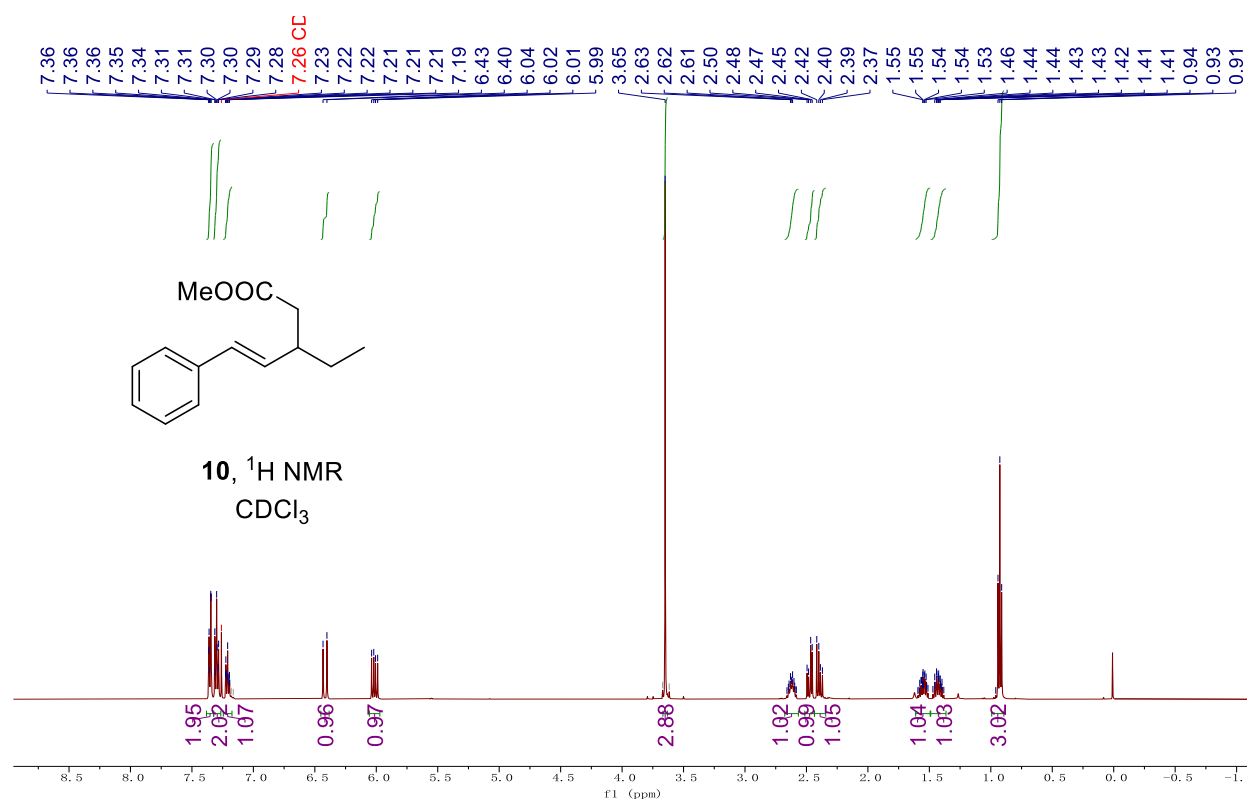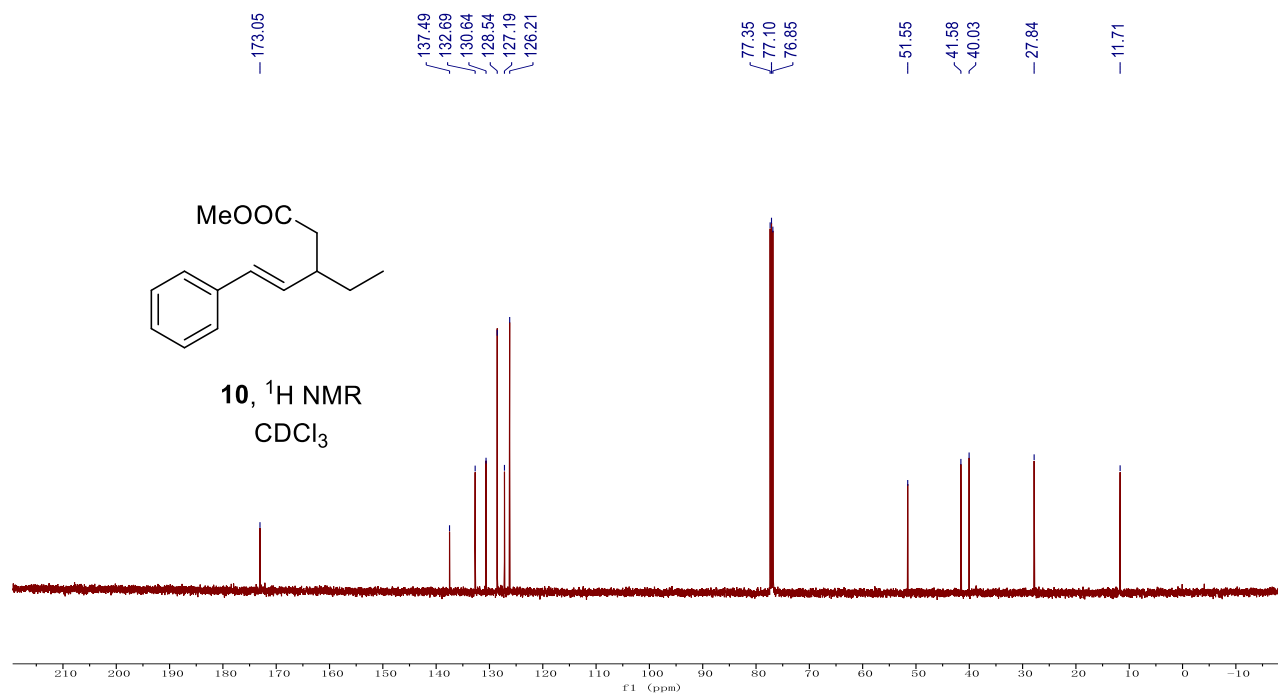

Supplementary Fig. 128. <sup>1</sup>H NMR and <sup>13</sup>C NMR spectra of compound 10.

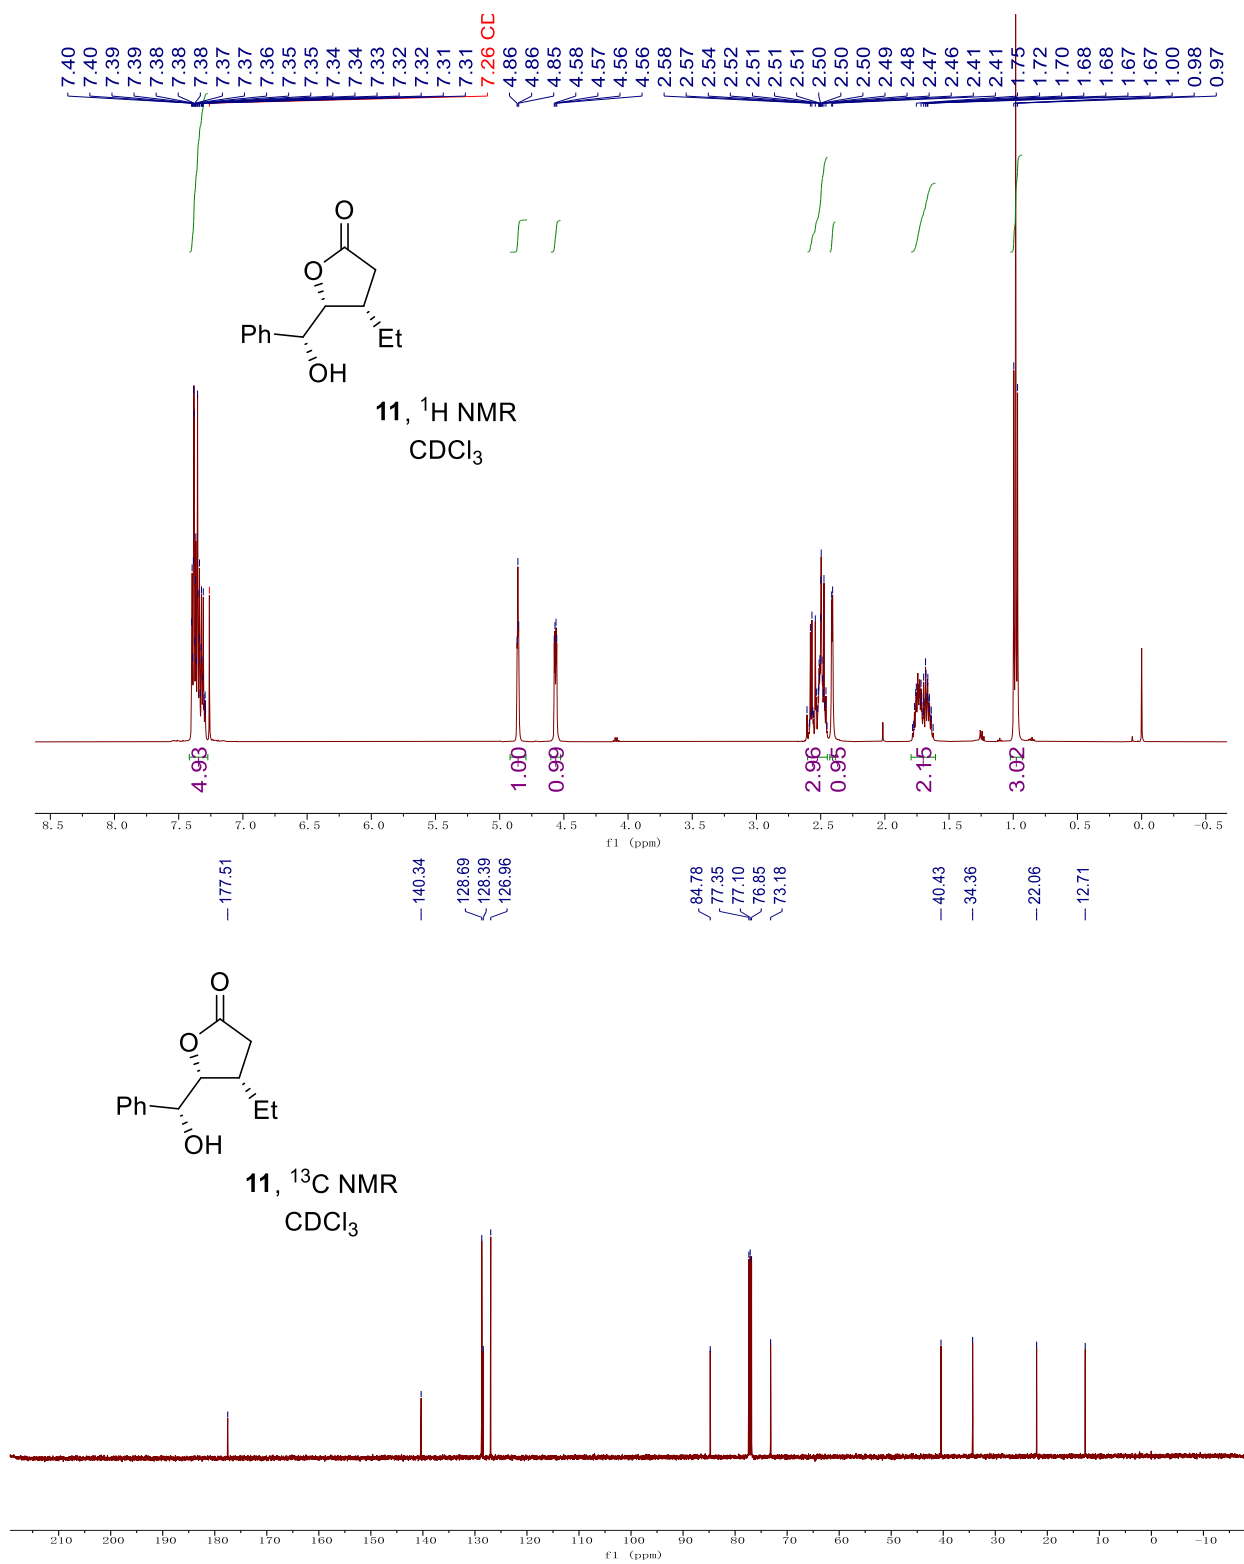

Supplementary Fig. 129. <sup>1</sup>H NMR and <sup>13</sup>C NMR spectra of compound 11.

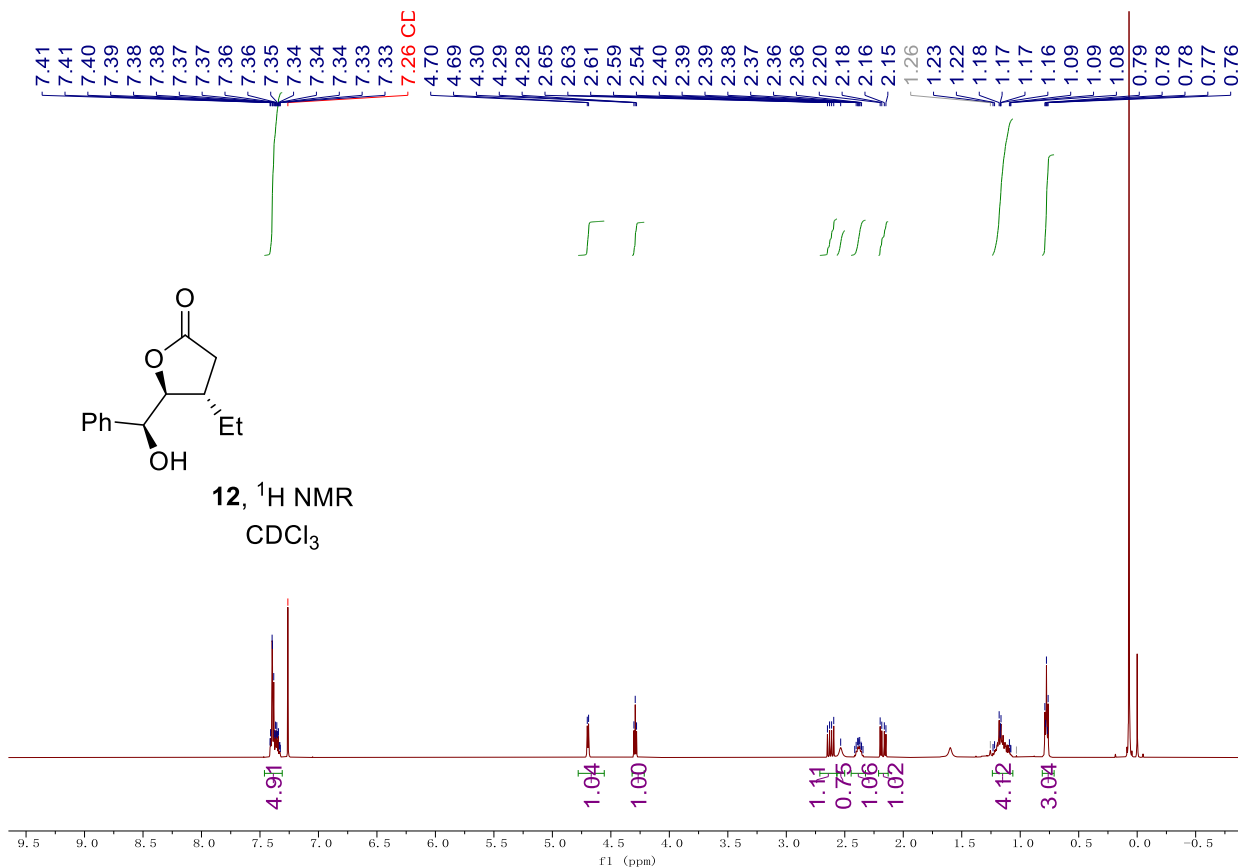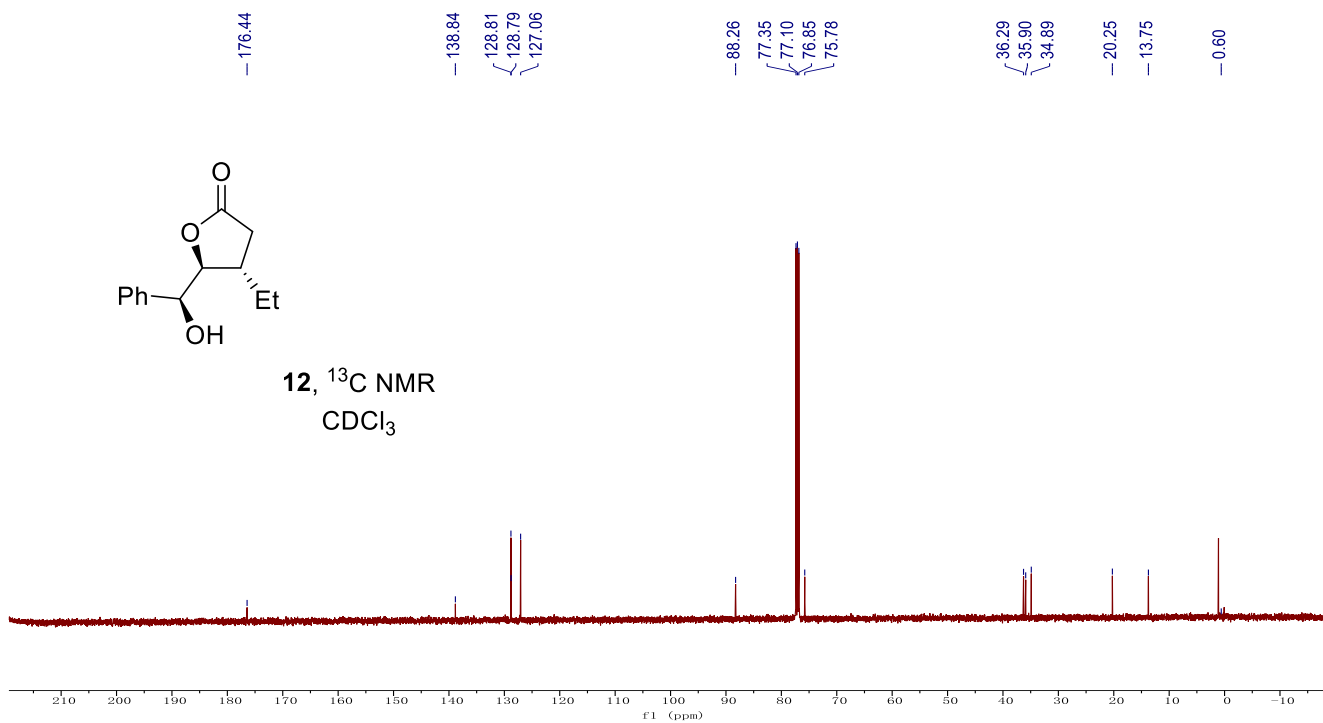

**Supplementary Fig. 130.**  $^1\text{H NMR}$  and  $^{13}\text{C NMR}$  spectra of compound **12**.

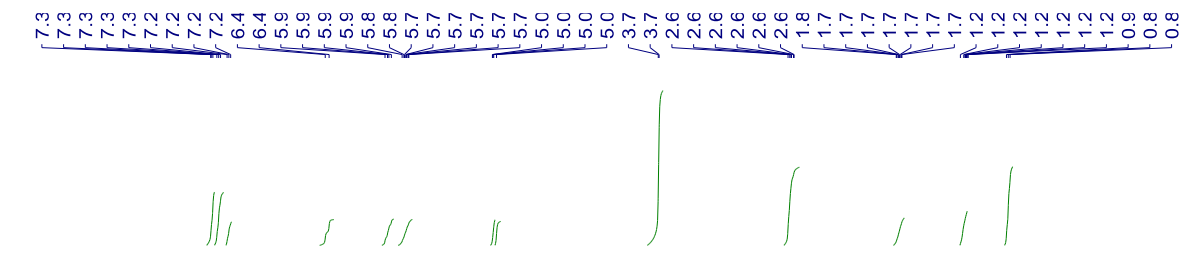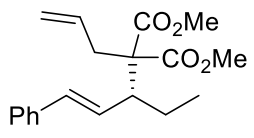

**13**, <sup>1</sup>H NMR  
CDCl<sub>3</sub>

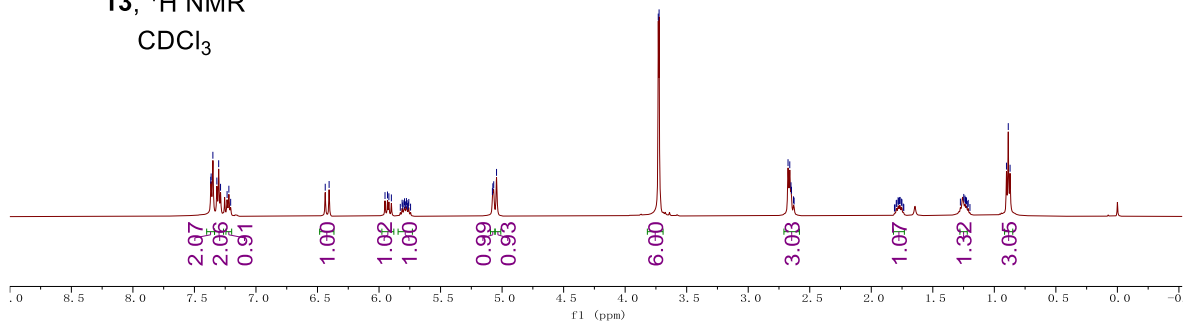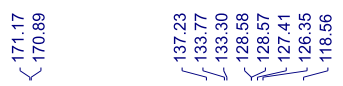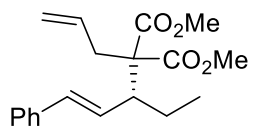

**13**, <sup>13</sup>C NMR  
CDCl<sub>3</sub>

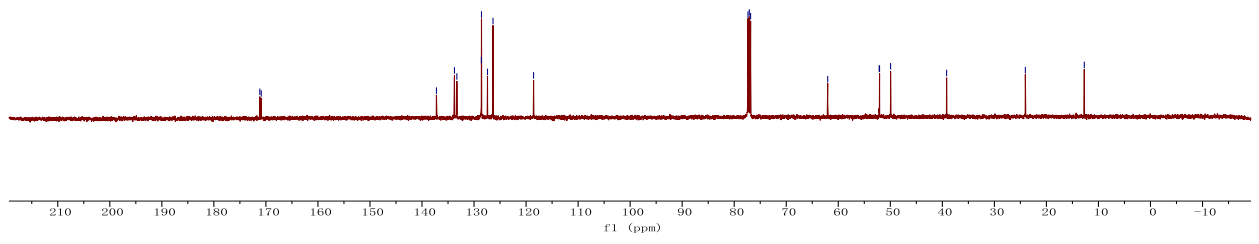

**Supplementary Fig. 131.** <sup>1</sup>H NMR and <sup>13</sup>C NMR spectra of compound **13**.

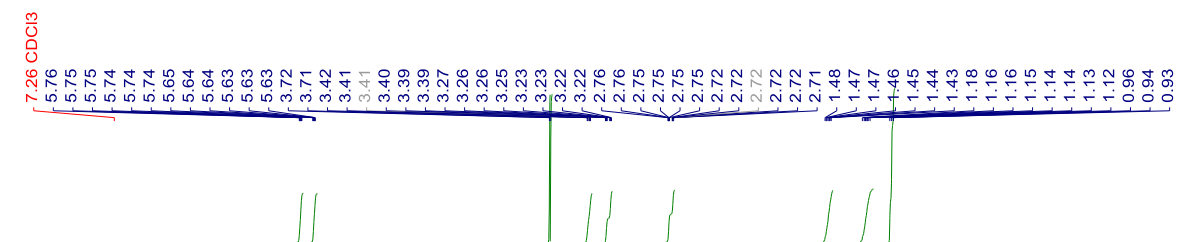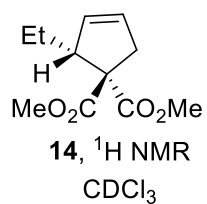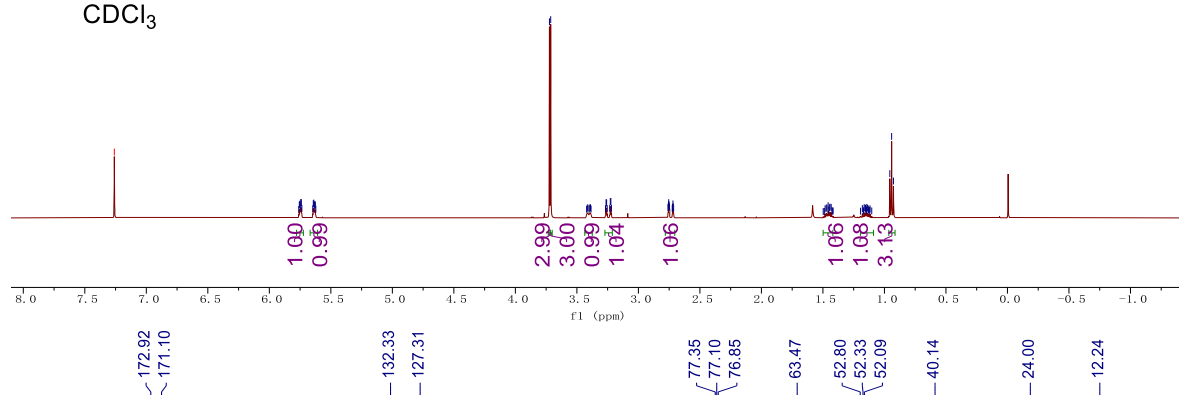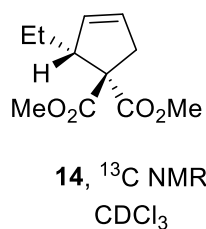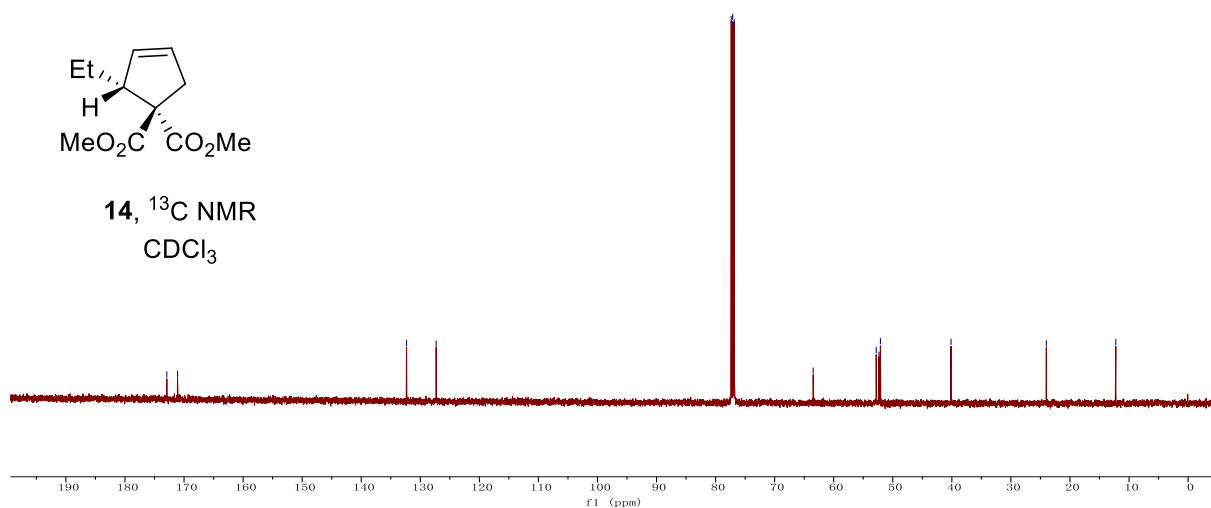

**Supplementary Fig. 132.** <sup>1</sup>H NMR and <sup>13</sup>C NMR spectra of compound **14**.



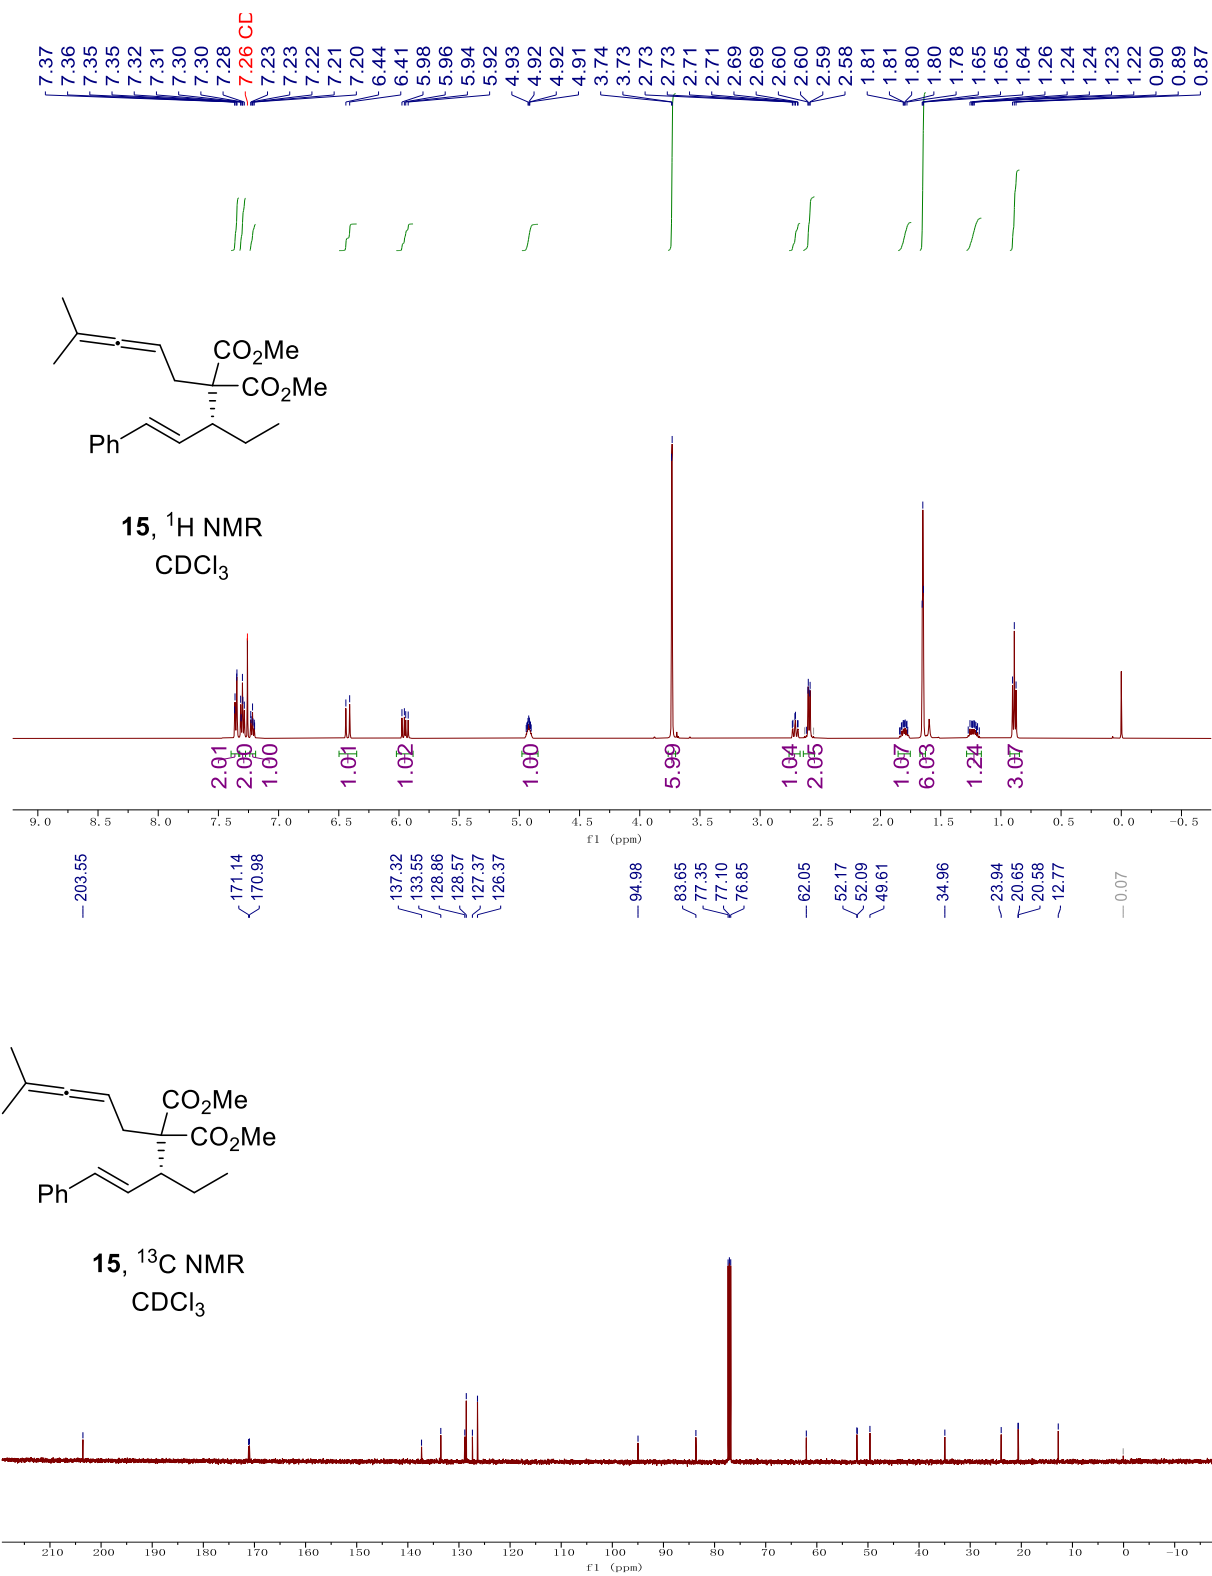

**Supplementary Fig. 133.** <sup>1</sup>H NMR and <sup>13</sup>C NMR spectra of compound **15**.

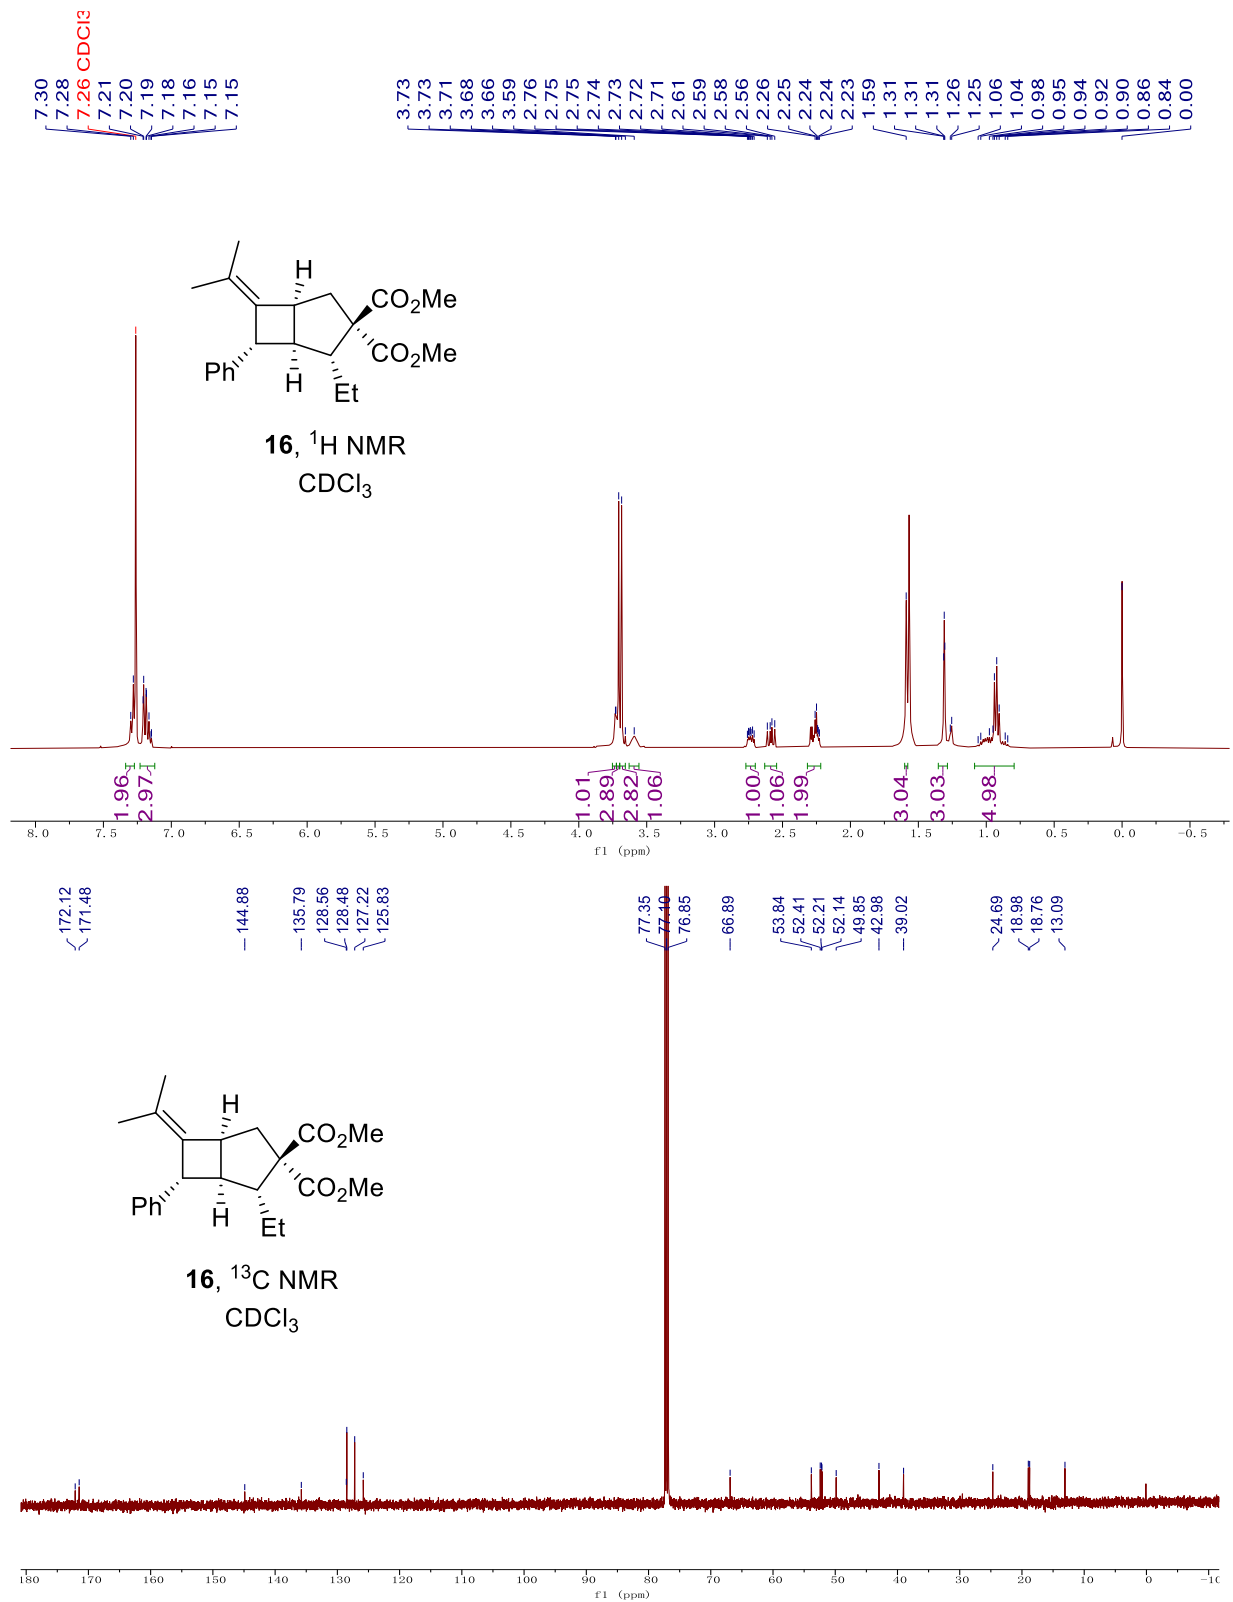

**Supplementary Fig. 134.** <sup>1</sup>H NMR and <sup>13</sup>C NMR spectra of compound **16**.

## Supplementary References

- [1] Li, M. B., Wang, Y., Tian, S.-K. *Angew. Chem. Int. Ed.* **51**, 2968–2971 (2012).
- [2] Affo, W., Ohmiya, H., Fujioka, T., Ikeda, Y., Nakamura, T., Yorimitsu, H., Oshima, K., Imamura, Y., Mizuta, T., Miyoshi, K. *J. Am. Chem. Soc.* **128**, 8068–8077 (2006).
- [3] Krasovskiy, A. L.; Haley, S.; Voigtritter, K.; Lipshutz, B. H. *Org. Lett.* **2014**, *16*, 4066–4069.
- [4] Liu, X., Zhang, W., Wang, Y., Zhang, Z.-X., Jiao, L., Liu, Q. *J. Am. Chem. Soc.* **140**, 6873–6882 (2018).
- [5] Sumida, Y., Hayashi, S., Hirano, K., Yorimitsu, H., Oshima, K. *Org. Lett.* **10**, 1629–1632 (2008).
- [6] Wang, G.-Z., Shang, R., Fu, Y. *Org. Lett.* **20**, 888–891 (2018).
- [7] Ji, D.-W., Hu, Y.-C., Zheng, H., Zhao, C.-Y., Chen, Q.-A., Dong, V. M. *Chem. Sci.* **10**, 6311–6315 (2019).
- [8] Azemi, T., Kitamura, M., Narasaka, K. *Tetrahedron* **60**, 1339–1344 (2004).
- [9] Jiménez-Aquino, A.; Flegeau, E. F.; Schneider, U.; Kobayashi, S. *Chem. Commun.*, **2011**, *47*, 9456–9458.
- [10] Gan, Y., Hu, H., Liu, Y. *Org. Lett.* **22**, 4418–4423 (2020).
- [11] Zhang, J.-J., Yang, J.-C., Guo, L.-N., Duan, X.-H. *Chem. Eur. J.* **23**, 10259–10263 (2017).
- [12] Sharpless, K. B., Amberg, W., Bennani, Y. L., Crispino, G. A., Hartung, J., Jeong, K. S., Kwong, H. L., Morikawa, K., Wang, Z. M. *J. Org. Chem.* **57**, 2768–2771 (1992).
